# Supplementary material for: Dynamic evolution and biogenesis of small RNAs during sex reversal
Source: PubMed Central journal article supplement (PMC4421800; doi:10.1038/srep09999), 2015-05-06
Supplement: srep09999-s1.pdf [file srep09999-s1.pdf]

---

**Supplementary information for**

**Dynamic evolution and biogenesis of small RNAs during sex reversal**

**Running title:**

Small RNA and sex reversal

Jie Liu, Majing Luo, Yue Sheng, Qiang Hong, Hanhua Cheng<sup>\*</sup>, Rongjia Zhou<sup>\*</sup>

Department of Genetics, College of Life Sciences, Wuhan University, Wuhan 430072, P. R. China

<sup>\*</sup>Corresponding authors: Professors Rongjia Zhou and Hanhua Cheng, Department of Genetics and Center for Developmental Biology, College of Life Sciences, Wuhan University, Wuhan 430072, P. R. China, Fax: 0086-27-68756253, E-mail: rjzhou@whu.edu.cn, hhcheng@whu.edu.cn

---

Including:

Supplementary Table S1

Supplementary Table S2

Supplementary Table S2

Supplementary Table S2

Supplementary Figure S1

Supplementary Figure S2

Supplementary Figure S3

---

**Supplementary Table S1 | Small RNA classifications**

---

| Type             | Ovary           |       | Ovotestis       |       | Testis          |       |
|------------------|-----------------|-------|-----------------|-------|-----------------|-------|
|                  | Reads<br>number | %     | Reads<br>number | %     | Reads<br>number | %     |
| Exon_antisense   | 556,913         | 4.69  | 558,917         | 4.20  | 1,178,458       | 5.27  |
| Exon_sense       | 739,801         | 6.23  | 656,688         | 4.93  | 1,857,518       | 8.31  |
| Intron_antisense | 401,011         | 3.37  | 457,397         | 3.43  | 926,393         | 4.15  |
| Intron_sense     | 1,416,121       | 11.92 | 1,602,473       | 12.03 | 3,706,984       | 16.59 |
| miRNA            | 709,265         | 5.97  | 1,065,014       | 7.99  | 1,707,05        | 7.64  |
| rRNA             | 2,591,369       | 21.81 | 2,493,059       | 18.71 | 367,666         | 1.65  |
| Repeat           | 8,512           | 0.07  | 7,531           | 0.06  | 43,213          | 0.19  |
| snRNA            | 6,139           | 0.05  | 9,352           | 0.07  | 16,703          | 0.07  |
| snoRNA           | 2,865           | 0.02  | 2,839           | 0.02  | 6,942           | 0.03  |
| tRNA             | 213,729         | 1.80  | 170,644         | 1.28  | 629,270         | 2.82  |
| piRNA            | 5,222,740       | 44.07 | 6,275,011       | 47.1  | 11,833,225      | 52.95 |
| Novel miRNA      | 14,243          | 0.12  | 11,309          | 0.08  | 37,063          | 0.17  |
| Total            | 11,882,708      | 100   | 13,321,543      | 100   | 22,347,593      | 100   |

---

**Supplementary Table S2 | Conserved miRNA information**

| Conserved miRNA ID | Precursors                                                                                       | MFE    | Mature ID        |                  | Mature sequences        |                         |
|--------------------|--------------------------------------------------------------------------------------------------|--------|------------------|------------------|-------------------------|-------------------------|
|                    |                                                                                                  |        | Mature miRNA -5p | Mature miRNA -3p | Mature miRNA -5p        | Mature miRNA -3p        |
| let-7a-1           | CCTAGCAAGGTGAGGTAGTAGGTTGTATAGTTTGGGGATGGAGTAACTCCTACCCAGGTGATAACTATACAGTCTATTACCTTCTTGAGA       | -50.8  | let-7a-5p        | let-7a-1-3p      | TGAGGTAGTAGGTTGTATAGTT  | CTATACAGTCTATTACCTT     |
| let-7a-2           | CACTGTGGGCTGAGGTAGTAGGTTGTATAGTTTGGGTCACACCCGCACAGGAGATAAATTTCAACCTACTGTCTTCTCAAAGTGTC           | -36.5  | let-7a-5p        | let-7a-2-3p      | TGAGGTAGTAGGTTGTATAGTT  | CTATTAACCTACTGTCTTTC    |
| let-7a-3           | GCTCCCAGGTTGAGGTAGTAGGTTGTATAGTTGAGAATTACACCCAGGAGATAACTGTACAACCTCCTAGCTTTCCTGAGGTATG            | -33.01 | let-7a-5p        | let-7a-3-3p      | TGAGGTAGTAGGTTGTATAGTT  | CTGTACAACCTCCTAGCTTTC   |
| let-7a-4           | CTCCGAGGTTGAGGTAGTAGGTTGTATAGTTACAGAGTACACCAAAGGAGATAACTGTACAGCCTCCTAGCTTTCCTGAGGACAC            | -33.01 | let-7a-5p        | let-7a-4-3p      | TGAGGTAGTAGGTTGTATAGTT  | CTGTACAGCCTCCTAGCTTTC   |
| let-7a-5           | TCCTTTGGGGTGAAGGTAGTAGGTTGTATAGTTTGGGTCCTCCCAAGTTGCAGATGACTATACAACCTTACTGTCTTTCCTGGAGCGACT       | -38.3  | let-7a-5p        | let-7a-5-3p      | TGAGGTAGTAGGTTGTATAGTT  | CTATACAGTCTATTGCCTTCC   |
| let-7a-6           | TCTGTACAGGTTGAGGTAGTAGGTTGTATAGTTTGGTGGTGGGATTGCACCTGCTCAGGTGATAACTATACAGTCTATTGCCTTCTTGAGGAGCTC | -45.1  | let-7a-5p        | -                | TGAGGTAGTAGGTTGTATAGTT  | -                       |
| let-7a-7           | TCCTTTGGGGTGAAGGTAGTAGGTTGTATAGTTTGGGTCATACCCCTCGTGTGAGATAACTATACAACCTTACTGTCTTTCCTAAAGTGGCT     | -45.1  | let-7a-5p        | -                | TGAGGTAGTAGGTTGTATAGTT  | -                       |
| let-7b-1           | TCGTACAGGTTGAGGTAGTAGGTTGTGTGGTTTCAGGTTGTGATTTACCCCATCAGGAGCTAATATACAACCTACTGCCTTCCCTGGAGGCCA    | -49.1  | let-7b-5p        | let-7b-3p        | TGAGGTAGTAGGTTGTGTGG    | CTATACAGTCTATTGCCTTCC   |
| let-7b-2           | TCGTACAGGTTGAGGTAGTAGGTTGTGTGGTTTCAGGTTGTGATTTGCCCAATCAGGAGATAACTATACAACCTACTGCCTTCCCGAA         | -50.8  | let-7b-5p        | let-7b-3p        | TGAGGTAGTAGGTTGTGTGG    | CTATACAGTCTATTGCCTTCC   |
| let-7c             | GCATCCGGTTGAGGTAGTAGGTTGTATAGTTTGAAGTACACCCCTGGGAGTTAACTGTACAACCTTCTAGCTTTCCTTGGAGTA             | -33.91 | let-7c-5p        | let-7c-3p        | TGAGGTAGTAGGTTGTATAGTT  | CTGTACAACCTTCTAGCTTTC   |
| let-7d-1           | CTCTGCAGTGTAGGTAGTTGGTTGTATGGTTTGCATAATAAACAGCTTGGAGATAACTGTACAACCTTCTAGCTTTCCTGCGGTGT           | -31.2  | let-7d-5p        | let-7d-3p        | TGAGGTAGTTGGTTGTATAGTT  | CTGTACAACCTTCTAGCTTTC   |
| let-7d-2           | CTCTGCGGTGTAGGTAGTTGGTTGTATGGTTTGCATAATAAACAGCCTGGAGATAACTGTACAACCTTCTAGCTTTCCTGCGGAGT           | -33.91 | let-7d-5p        | let-7d-3p        | TGAGGTAGTTGGTTGTATAGTT  | CTGTACAACCTTCTAGCTTTC   |
| let-7j             | CACTTTGGTCTGAGGTAGTTGTTGTACAGTTTGGGTTCTGTGATTTGCCCATACAGGAGCTAATGTACAAGTACTGCCTTCCCGACGGTT       | -36.7  | let-7j-5p        | -                | TGAGGTAGTTGTTGTACAGTT   | -                       |
| let-7k-1           | TCCTAAGGCTGAGGTAGTAGATTGAATAGTTGGGGTCTGAGTCTCTCTGAGATAACTATACAATCTACTGTCTTTCCTAAGGAG             | -43.5  | let-7k-5p        | -                | TGAGGTAGTTGTTGTACAGTT   | -                       |
| let-7k-2           | TCCTGGGGCTGAGGTAGTAGATTGAATAGTTGGGGTTGTGTAACCTCTTTTGGAGATAACTATACAATCTACTGTCTTTCCTAAGGAA         | -48.2  | let-7k-5p        | -                | TGAGGTAGTTGTTGTACAGTT   | -                       |
| miR-103a-1         | GCTCTACGCTTTTACGCTCTTTACAGTCTGCTCCCTGTCTGATCATGTTCAAGCAGCATTGTACAGGGCTATGACAGCATAGAG             | -35.7  | miR-103a-5p      | miR-103a-3p      | AGCAGCATTGTACAGGGCTATGA | AGCCTCTTTACGGTCTGCC TTG |
| miR-103a-2         | CTTTGCATTCAGCCTCTTTACGGTCTGCTCCCTGTGGCATCTTGTCAAGCAGCATTGTACAGGGCTATGAAGGCATAGAG                 | -31.7  | miR-103a-5p      | miR-103a-3p      | AGCAGCATTGTACAGGGCTATGA | AGCCTCTTTACGGTCTGCC TTG |
| miR-107            | GTGTGCAGTGAAGCTTTTACAGTGTGCTTGTGGCATGGGCATCAAGCAGCATTGTACAGGGCTATCACTGCATA                       | -35.5  | -                | miR-107-3p       | -                       | AGCAGCATTGTACAGGGCTA    |
| miR-10a-1          | ACCTATACACACCTGTAGATCCGAATTTGTGTAATAACAACGGCAGCCACAAGTTTCGCATCTTGGGGAGTTTGTAGGTG                 | -30.99 | miR-10a-5p       | -                | CACCCTGTAGATCCGAATTTGT  | -                       |
| miR-10a-2          | ACCTATACACACCTGTAGATCCGAATTTGTGTAATAACAACGGCAGCCACAAGTTTCGCATCTTGGGGAGTTTGTAGGTG                 | -30.99 | miR-10a-5p       | -                | CACCCTGTAGATCCGAATTTGT  | -                       |
| miR-10b-1          | CGTCTATATACCTCTGAGAACC GAATTTGTGTGATAAAAACACAGTACAGATTCCGATTCTAGGGGAGTATATGGTCTGA                | -33.16 | -                | miR-10b-3p       | -                       | AGATTTCGATTCTAGGGGAGT A |
| miR-10b-2          | TAGTTGTCTATATGACCCTGTAGAACC GAATTTGTGTAAGTCCAAACAGTCGCAAAATACGTTCTACAGGAATACATGGGCAA             | -32.7  | miR-10b-5p       | miR-10b-3p       | TACCCTGTAGAACC GAATTTGT | AGATTTCGATTCTAGGGGAGT A |
| miR-10c            | CTTCTATATCTACCCTGTAGATCCGGATTTGTGTAATAAATCATTAAAACATCACAATTCGCTTCTAGGGGAGTATATAGTGA              | -27.61 | miR-10c-5p       | -                | TACCCTGTAGATCCGGATTTGT  | -                       |
| miR-10d            | TGCCTATATACCTCTGAGAACC GAATGTGTGGAGCTGCCTCAGTCACAGATTGGGTTCTAGGGGAGTCTATGGGCGA                   | -39.1  | miR-10d-5p       | -                | TACCCTGTAGAACC GAATGTGT | -                       |
| miR-122            | TCCAGAGCTGTGGAGTGTGACAAATGGTGTGTTGTCTGTATGTCAAACGCCATTATCACACTAAATAGCTACAGT                      | -33.5  | miR-122-5p       | -                | AAAGCCATTATCACACTAAA    | -                       |
| miR-1238           | GTTTCAGATCATTCTCGTCTGTCTGCTCCAATCTCGCTGCTCTGAATGCAAAACCCATCTGTGGAAGCTGTACAGGAATATGAGTGTGGGC      | -20.47 | miR-1238-5p      | -                | ATTCTCGTCTGTCTGCTCCA    | -                       |
| miR-125a-1         | TGCTTCATTGTCCCTGAGACCCCTAACCTGTGATGATATGAAAGGTCACAGGTGAGGTCCTTGGGAAACAAGGTGCAT                   | -33.4  | miR-125a-5p      | miR-125a-3p      | TCCCTGAGACCCTTAACCTGTG  | CAGGTGAGGTCCTTGGGAAAC   |
| miR-125a-2         | TGCCCTCTGTCCCTGAGACCCCTAACCTGTGAGGTCAAAGTAGGTCACAGGTGAGGTCCTCGGGAACAGGGCTGCAT                    | -38.7  | miR-125a-5p      | miR-125a-3p      | TCCCTGAGACCCTTAACCTGTG  | CAGGTGAGGTCCTTGGGAAAC   |

|             |                                                                                     |        |               |               |                       |                           |
|-------------|-------------------------------------------------------------------------------------|--------|---------------|---------------|-----------------------|---------------------------|
| miR-125b-1  | TTTTCTCTGTCCCTGAGACCCTAACTGTGACGTTGTGCTTTCATGTCCACGGGTTAGGCTCTGGGAGCTGGGAGGGA       | -36.3  | miR-125b-5 p  | miR-125b-3 p  | ACGGGTTAGGCTCTGGGAGC  | TCCCTGAGACCCTAACTGTGA     |
| miR-125b-2  | CTTCACCTGCTCCCTGAGACCCTAACTGTGACGCTCTTGATAAAAAATCACGGGTTAGGCTCTGGGACGCGGGCGGAGGG    | -40.93 | miR-125b-5 p  | miR-125b-3 p  | ACGGGTTAGGCTCTGGGAGC  | TCCCTGAGACCCTAACTGTGA     |
| miR-125b-3  | CCTCTCTCATTCCCTGAGACCCTAACTGTGACGTTGGCTGTGATGTGCACGGGTTGGGTTCTGGGAGCTGCGAGGGGCA     | -41    | miR-125b-5 p  | miR-125b-3 p  | ACGGGTTAGGCTCTGGGAGC  | TCCCTGAGACCCTAACTGTGA     |
| miR-128-1   | GAGAGGTGGGATACGGGACCGGGACGCTGTCTGAGAGGTCTCTATGAATCTCACAGTGAACCGGTCTCTTTTCAGCCCT     | -35.7  | miR-128-5p    | miR-128-3p    | TCACAGTGAACCGGTCTCTTT | GGGGGCCGTTACTACTGCAG A    |
| miR-128-2   | CAGCAGTAGAGGAGGGGGCCGTTACACTGTCAGAGATGAGTCTGAGGGTCTCACAGTGAACCGGTCTCTTTCTGCTGCT     | -42.1  | miR-128-5p    | miR-128-3p    | TCACAGTGAACCGGTCTCTTT | GGGGGCCGTTACTACTGCAG A    |
| miR-130a    | TGTTCTGTCCGTTGCCCTTTTCTGTTGCACACTGGACATTGAGATGAGCAGTGAATATTAAGGGCATTGGCTGATGA       | -30.8  | -             | miR-130a-3 p  | -                     | CAGTGAATATTAAGGGC AT      |
| miR-130b-1  | GTTGTCCAAGGCTCTTTTCTGTTGACTACTGTGAAATCAGATGAGCAGTGAATATTAAGGGCATTGGCTGACAA          | -27.32 | miR-130b-5 p  | miR-130b-1-3p | GCTCTTTTCTGTTGACTACT  | CAGTGAATATTAAGGGC AT      |
| miR-130b-2  | TCACTGCCTGACACTCTTTACATGTTGCACTACTGAGGGAGCTACAGCAAGCAGTGAATACGAAAGGGCATTGATCAGCTG   | -27.6  | miR-130b-5 p  | miR-130b-2-3p | GCTCTTTTCTGTTGACTACT  | CAGTGAATACGAAAGGGC AT     |
| miR-133b    | CACGCTTGTCTGGCTGGTCAAACGGAACCAAGTCAGGTGTTGGTCCCCTTCAACCAGCTAAACCAGCTACTGCGTCGT      | -30.9  | -             | miR-133b-3 p  | -                     | TTGGTCCCCTTCAACCAGC TA    |
| miR-133a-1  | GCTTGTCAAAGCTGGTAAATGGAACCAATCACTCTTGAATGGATTGGTCCCCTTCAACCAGCTGTAGCTATGCTT         | -31.6  | miR-133a-5 p  | miR-133a-3 p  | AGCTGGTAAATGGAACCAAA  | TTGGTCCCCTTCAACCAGC GT    |
| miR-133a-2  | GCTTGTCAAAGCTGGTAAATGGAACCAATCACTCTTGAATGGATTGGTCCCCTTCAACCAGCTGTAGCTGTGCAT         | -32.1  | miR-133a-5 p  | miR-133a-3 p  | AGCTGGTAAATGGAACCAAA  | TTGGTCCCCTTCAACCAGC GT    |
| miR-135a-1  | CAGTGCCTGTATGGCTTTTATTCTATCTGACTGTAATGTTTCAATAGGGATGGAAGCCATGCAATGCGCTGG            | -41    | miR-135a-1-5p | miR-135a-1-3p | TATGGCTTTTATTCTATCTGA | ATATGGGATGGAAGCCATG C     |
| miR-135a-2  | ACTTGTCTTATGGCTTTTATTCTATCTGTAATCTTTTCAATATGTCATGAGGGTTAAAGCCATTGGATACAATG          | -29.46 | miR-135a-2-5p | miR-135a-2-3p | TATGGCTTTTATTCTATCTGA | ATATGGGATGGAAGCCATG GG    |
| miR-135c-1  | ACTTGTCTTATGGCTTTTATTCTATCTGTAATCTTTTCAATATGTCATGAGGGTTAAAGCCATTGGATACAATG          | -29.46 | miR-135c-5 p  | miR-135c-3p   | TATGGCTTTTATTCTATCTG  | ATATGGGATGGAAGCCATG GG    |
| miR-135c-2  | TGCTGTGTTTATGGCTTTTATTCTATCTGTAATCTTTTATAGCATGTCACATAGGGTCTAAAGCCATTGGTACAGAG       | -32.1  | miR-135c-5 p  | miR-135c-3p   | TATGGCTTTTATTCTATCTG  | ATATGGGATGGAAGCCATG GG    |
| miR-137a    | ACTCTCTCCGGTACCGGTTATTCTGGTGGATAATACGGATCACGTTGTTATTGCTTAAAGATAACCGTAGTCGAGGAGAG    | -41.9  | -             | miR-137a-3 p  | -                     | TTATTGCTGAGAATACGCGT A    |
| miR-137b    | CTCCGGTCTCGACCACGGTATTCTGGTGGATAATACAGATGGATGTTATTGCTTGAAGATAACCGTAGTCGAGTGGAA      | -36.2  | -             | miR-137b-3 p  | -                     | TTATTGCTTGAAGATAACGCGT AG |
| miR-138-1   | GGAGAGGGTCAGCTGGTGTGGAATCAGGCCGCTGAAGTGTGCAGACCGCTTTTTCATAACACCAGGGTTCTCCCT         | -40.9  | miR-138-5p    | -             | AGCTGGTGTGGAATCAGGC   | -                         |
| miR-138-2   | GGGGCCGACAGCTGGTGTGGAATCAGGCCGCCACAGTGCAGGACCGGCTACTTCCAAACACCAGGGTCTCACCAT         | -36.2  | miR-138-5p    | -             | AGCTGGTGTGGAATCAGGC   | -                         |
| miR-138-3   | TGTGTCTACAGCTGGTGTGGAATCAGGCCGATGACAAACCTGCTATAACCCGGCTATTTCACAACACCAGGGTGGCACTGCAC | -41.35 | miR-138-5p    | -             | AGCTGGTGTGGAATCAGGC   | -                         |
| miR-138b-1  | TGTGCCATGGTTGTCAGTTTCCAAAACAGACAAGGATCCCTCTGGTTTTGTGAATCAGCTGACATGGTATG             | -27.6  | -             | miR-138b-3 p  | -                     | CTGGTTTTGTGAATCAGCTG      |
| miR-138b-9  | TGTGCCATGGTTGTCAGTTTCCAAAACAGACAAGGATCCCTCTGGTTTTGTGAATCAGCTGACATGGTATG             | -27.6  | -             | miR-138b-3 p  | -                     | CTGGTTTTGTGAATCAGCTG      |
| miR-138b-10 | TGTGCCATGGTTGTCAGTTTCCAAAACAGACAAGGATCCCTCTGGTTTTGTGAATCAGCTGACATGGTATG             | -27.7  | -             | miR-138b-3 p  | -                     | CTGGTTTTGTGAATCAGCTG      |
| miR-138b-11 | TGTGCATGGTTATGTCAGTTTCCAAAACAGACAAGGATCCCTCTGGTTTTGTGAATCAGCTGACATGGTATG            | -23    | -             | miR-138b-3 p  | -                     | CTGGTTTTGTGAATCAGCTG      |
| miR-138b-2  | TGTGCCATGGTTGTCAGTTTCCAAAACAGACAAGGATCCCTCTGGTTTTGTGAATCAGCTGACATGGTATG             | -27.6  | -             | miR-138b-3 p  | -                     | CTGGTTTTGTGAATCAGCTG      |
| miR-138b-3  | TGTGCCATGGTTGTCAGTTTCCAAAACAGACAAGGATCCCTCTGGTTTTGTGAATCAGCTGACATGGTATG             | -21    | -             | miR-138b-3 p  | -                     | CTGGTTTTGTGAATCAGCTG      |
| miR-138b-4  | TGTGCCATGGTTGTCAGTTTCCAAAACAGACAAGGATCCCTCTGGTTTTGTGAATCAGCTGACATGGTATG             | -26.6  | -             | miR-138b-3 p  | -                     | CTGGTTTTGTGAATCAGCTG      |
| miR-138b-5  | TGTGCCATGGTTGTCAGTTTCCAAAACAGACAAGGATCCCTCTGGTTTTGTGAATCAGCTGACATGGTATG             | -27.6  | -             | miR-138b-3 p  | -                     | CTGGTTTTGTGAATCAGCTG      |
| miR-138b-6  | TGTGCCATGGTTGTCAGTTTCCAAAACAGACAAGGATCCCTCTGGTTTTGTGAATCAGCTGACATGGTATG             | -31.6  | -             | miR-138b-3 p  | -                     | CTGGTTTTGTGAATCAGCTG      |
| miR-138b-7  | TGTGCCATGGTTGTCAGTTTCCAAAACAGACAAGGATCCCTCTGGTTTTGTGAATCAGCTGACATGGTATG             | -24    | -             | miR-138b-3 p  | -                     | CTGGTTTTGTGAATCAGCTG      |
| miR-138b-8  | TGTGCCATGGTTGTCAGTTTCCAAAACAGACAAGGATCCCTCTGGTTTTGTGAATCAGCTGACATGGTATG             | -31    | -             | miR-138b-3 p  | -                     | CTGGTTTTGTGAATCAGCTG      |
| miR-139     | TGGTTGATTTACAGTGCATGTCTCCAGTATGTTAGTGATGCTACTGGAGCCAGCTCTGTTGGAATAACAACCA           | -39.5  | miR-139-5p    | miR-139-3p    | TCTACAGTGCATGTCTCCAG  | TGGAGACCAGCTCTGTTGG A     |
| miR-140     | AGTGTACAGTCAAGTTTACCCTATGGTAGTGACATCATGCTGTTCTACCACAGGGTAGAACCCAGGACGGGATGTTGG      | -42.8  | miR-140-5p    | miR-140-3p    | CAGTGGTTTACCCTATGGTAG | ACCACAGGGTAGAACCCAGG AC   |
| miR-142-1   | TGTTGTCAACATAAAGTAGAAAGCACTACTAACTTTACTGCACAGTGTAGTGTCTTCTACTTTATGGATGAGTATAC       | -28.87 | miR-142-5p    | miR-142-3p    | CATAAAGTAGAAAGCACTACT | TGTAGTGTCTACTTTATG G      |
| miR-142-2   | TGCAGTCAACATAAAGTAGAAAGCACTACTAACTCCTCACCACAGTGTAGTGTCTTCTACTTTATGGATGAGTGTAC       | -38.97 | miR-142-5p    | miR-142-3p    | CATAAAGTAGAAAGCACTACT | TGTAGTGTCTACTTTATG G      |

|            |                                                                                             |        |               |               |                         |                           |
|------------|---------------------------------------------------------------------------------------------|--------|---------------|---------------|-------------------------|---------------------------|
| miR-143    | TGTGGCCCATGGTGCAGTGTGCATCTCTGGTCAGTTGGTAGTCTGAGATGAAGCACTGTAGCTCGGGACGGAG                   | -31.3  | miR-143-5p    | miR-143-3p    | GGTGCAGTGTGCATCTCTGG    | TGAGATGAAGCACTGTAGCT      |
| miR-144    | GCCCTGGACAGGATATCATCTTATACTGTAAGTTTATTAAGAGACACTACAGTATAGATGATGACTATCCAGGGT                 | -37    | miR-144-5p    | miR-144-3p    | GGATATCATCTTATACTGTAAGT | CTACAGTATAGATGATGAC       |
| miR-145    | CTCTCTCGGGTCCAGTTTTCCCGAATCCCTTGACCTATCAGAAAGGGGATTCTGGAATACTGTTCTTGGGGTGAG                 | -39.4  | miR-145-5p    | miR-145-3p    | GTCCAGTTTTCCCGAATCC     | GGATTCTGGAAACTGTTCT       |
| miR-146a   | TGCTCTACTATGAGAAGTAAATCCATAGATGGTGGCTACTTCAGGTGTCTATGGGCTCAGTTCTTTGGCATGGTAC                | -33.1  | miR-146a-5p   | -             | TGAGAAGTAAATCCATAGATGG  | -                         |
| miR-148    | TTTCCAAATAAAGTCTGTGATACACTAGACTCTAATTGCCTGCAGTCACTGACATTACAGAACTTTGTTTGGGAGT                | -31.6  | miR-148-5p    | miR-148-3p    | AAGTTCTGTGATACACTTAGACT | TCAGTGCATTACAGAACTTTG     |
| miR-150    | TGGTCTGGTCACTCCCAATCCTTGTACCAGTGTCTTGATACCAAGTGACGCTGGCAGGTTTGGGGGGGCTTTGCTAA               | -37.32 | miR-150-5p    | -             | ACTCCCAATCCTTGTACCAGTG  | -                         |
| miR-153-1  | CGGTTGCCAGTGTCACTTTTTGTGATGTTGCAGCTAGTAATATAAGCCAGTGCATAGTCACAAAAGTATCATTGGAGACT            | -36.7  | -             | miR-153-3p    |                         | TTGCATAGTCACAAAAGTATC     |
| miR-153-2  | CGGTTGCCAGTGTCACTTTTTGTGATGTTGCAGCTAGTAATAGAGCCAGTGCATAGTCACAAAAGTATCATTGGAACT              | -36.2  | -             | miR-153-3p    |                         | TTGCATAGTCACAAAAGTATC     |
| miR-155    | CAGATTGAGGATAATGCTAATCGTGATAGGGGTTGTTCCATTACCAGACACCTAACATGTTAGCATTAGCTTCGCTTTGG            | -28.3  | miR-155-5p    | miR-155-3p    | ACCTAACATGTTAGCATTAG    | ATAATGCTAATCGTGATAGG      |
| miR-15a    | GGTGATGCTGTAGCAGCACGGAATGGTTTGTGGTTACACTGAGATACAGCCATACTGTGCTGCTGCATTAACCT                  | -40.5  | miR-15a-5p    | miR-15a-3p    | TAGCAGCACGGAATGGTTTGT   | CAGGCCATACTGTGCTGCTGCA    |
| miR-15b-1  | TAGACTGCTATAGCAGCGCATCATGTTTGAACATTGCGGAAAAGTGCAGAACCTATTGCTGCTTTAGAATTTAA                  | -24.3  | miR-15b-1-5p  | miR-15b-3p    | TAGCAGCGCATCATGTTTGA    | TGCGAACCTATTGCTGCTTT      |
| miR-15b-2  | GGGTGCACTGTAGCAGCACATCATGTTTGCAGATATGACTGAATCACTCCAAAACCTATGCGCTGCTACTGTGAGCTCA             | -31.9  | miR-15b-2-5p  | miR-15b-3p    | TAGCAGCACATCATGTTTGA    | TGCGAACCTATTGCTGCTTT      |
| miR-16a    | TGCCACGCTTTCAGCAGCAGTAAATATTGGTGTGACAATAGACCCCAACCTAATTAGCAGTGTCTTCAAGTGTGGCTGG             | -39.89 | miR-16a-5p    | miR-16a-3p    | TAGCAGCAGTAAATATTGGT    | CAATATTAGCAGTGTGCTTCA     |
| miR-1657   | CATTAAGTACTAGTGTAGTTTGTGGTGTGCATTAAACAGATAATGAAATTAACCAAGGATTAAGCGGTAGAAAATGAATGA           | -22.3  | miR-1657-5p   | -             | TACTAGTGTAGTTTGTGGTGTGG | -                         |
| miR-16b    | CACCTTACTGTAGCAGCACGTAATATTGGAGTTAAGACTAAGTGAAGCCCTCAGTATTGATCGTGTCTGAAGCAAAGCTGA           | -33.53 | miR-16b-5p    | miR-16b-3p    | TAGCAGCACGTAATATTGGAG   | CCAGTATTGATCGTGTGCTGCTGAA |
| miR-17a-1  | TGTGATTGTCAAAGTCTTACAGTGCAGGTAGTACTGTGTAATACCTACTGCAGTGAAGGCACCTTACAGCAATCACT               | -33.5  | miR-17a-5p    | miR-17a-1-3p  | CAAAGTCTTACAGTGCAGGTA   | TACTGCAGTGAAGGCACCTTACA   |
| miR-17a-2  | AGTGTAGTGCCAAAGTCTTACAGTGCAGGTAGTTTTATAAGATCTACTGCAGTGAAGGCACCTTTCAGCACTGTTT                | -30.6  | miR-17a-5p    | miR-17a-2-3p  | CAAAGTCTTACAGTGCAGGTA   | ACTGCAGTGAAGGCACCTTTC     |
| miR-17a-3  | TGTGATTGTCAAAGTCTTACAGTGCAGGTAGTACTGTGTAATACCTACTGCAGTGAAGGCACCTTACAGCAATCACT               | -33.5  | miR-17a-5p    | -             | CAAAGTCTTACAGTGCAGGTA   | -                         |
| miR-1814a  | CTGCTCTGTTGTTTTTAAAGTTTTGATTTTTGTAGCATTGGATGAGAAAATCAAAGCCCTAAAGAAAATACAGCGCTG              | -29.8  | miR-1814a-5p  | -             | GTTTTTTAGTTTTGATTTT     | -                         |
| miR-181a-1 | TGCCTCGGTGAACATTCAACGCTGTCGGTGAAGTTTGGATGATGATCATAAAAACCATCGACCGTTGACTGTGCCCCGGCTC          | -36.7  | miR-181a-5p   | miR-181a-1-3p | AACATTCACGCTGTCGGTGAG   | ACCATCGACCGTTGACTGTG      |
| miR-181a-2 | CGCCCCAGTGAACATTCAACGCTGTCGGTGAAGTTTGGATGATGATCATAAAAACCATCGACCGTTGATTGTACCCTGTGGCCAG       | -32.3  | miR-181a-5p   | miR-181a-2-3p | AACATTCACGCTGTCGGTGAG   | ACCATCGACCGTTGATTGTGCC    |
| miR-181a-3 | AGTCTGGGGAACATTCAACGCTGTCGGTGAAGTTTGGATGATGATCATAAAAACCATCGAGTGTGAGTGTACCCCTACACTTGTGCTGACA | -31.8  | miR-181a-5p   | -             | AACATTCACGCTGTCGGTGAG   | -                         |
| miR-181a-4 | GCCACAGTGAACATTCAACGCTGTCGGTGAAGTTTGGATGATGATCATAAAAACCATCGACCGTTGATTGTACCCTGAGGGATG        | -32    | miR-181a-5p   | miR-181a-4-3p | AACATTCACGCTGTCGGTGAG   | ACCATCGACCGTTGATTGTGCC    |
| miR-181b-2 | GGTCAATCAACATTCACTGCTGTCGGTGGTTAACTGTGTGGAAGACTCACTGAACATGAATGCAACTGTGCCCC                  | -27.3  | miR-181b-2-5p | -             | AACATTCATTGCTGTCGGTGGT  | -                         |
| miR-181b-1 | GGTCAATCAACATTCACTGCTGTCGGTGGTTAACTGTGTGGAAGACTCACTGAACATGAATGCAACTGTGCCCCA                 | -31    | miR-181b-5p   | miR-181b-1-3p | AACATTCATTGCTGTCGGTGG   | CTCACTGAACATGAATGCA       |
| miR-181b-3 | GGCCGAATAAACATTCACTGCTGTCGGTGGTTAACTGTGTGGAAGACTCACTGAACATGAATGCAACTGTGCCCCA                | -32.5  | miR-181b-5p   | miR-181b-3-3p | AACATTCATTGCTGTCGGTGG   | CTCACTGATCAATGAATGCA      |
| miR-181c   | GTTTCTGGTTCACATTCACTGCTGTCGGTGGTTAACTGTGTGGAAGACTCACTGAACATGAATGCAACTGTGCCCCA               | -26.9  | miR-181c-5p   | -             | CACATTCAGCTGTCGGTGGG    | -                         |
| miR-182    | TCTGGTGGTTTGGCAATGGTGAAGTCACTGCTGAGGTAGATGATCCGGTGGTTCTAGACTTGCCAACTACTGCTTGAAG             | -30.44 | miR-182-5p    | -             | TTTGGCAATGGTGAAGTCACT   | -                         |
| miR-183-1  | CTGTTCTGTGATGGCACTGGTGAATCACTGTGAGAGCTCACTACTCAGTGAATACCATAGGGCCATAAAGCAGAGCAGA             | -38.2  | miR-183-5p    | -             | TATGGCACTGGTGAATCACTG   | -                         |
| miR-183-2  | CTATTCTGTGATGGCACTGGTGAATCACTGTGAGAGCTCACTACTCAGTGAATACCATAGGGCCATAAAGCAGAGTGA              | -34.84 | miR-183-5p    | -             | TATGGCACTGGTGAATCACTG   | -                         |
| miR-184-1  | TTGCTCACATCTCCTATCACTTTCCAGCCAGCTATGTGTTCTGTATCTGTTGACGGAGAAGTATAAGGGCATGTGCATGA            | -29.49 | miR-184-5p    | miR-184-3p    | TTATCACTTTCCAGCCAGC     | TGGACGGAGAAGTATAAGGGC     |
| miR-184-2  | TGAGCACATCTCCTATCACTTTCCAGCCAGCTATCTATCAAATGTTTGGACGGAGAAGTATAAGGGCATGTGTCTG                | -28.4  | miR-184-5p    | miR-184-3p    | TTATCACTTTCCAGCCAGC     | TGGACGGAGAAGTATAAGGGC     |
| miR-18a-1  | GTCTTTGTGCTAAGTGCATCTAGTGCAGATAGTAAATAGACTAGCACCTACTGCCCTAAGTCTCCTTCTGGCATAAGGGG            | -31.3  | miR-18a-5p    | miR-18a-3p    | TAAGGTGCATCTAGTGCAGATA  | ACTGCCCTAAGTCTCCTTCT      |
| miR-18a-2  | GTTCTTATGCTAAGTGCATCTAGTGCAGATAGTAAATAGACTAGCACCTACTGCCCTAAGTCTCCTTCTGGCATAAGGGT            | -29.91 | miR-18a-5p    | miR-18a-3p    | TAAGGTGCATCTAGTGCAGATA  | ACTGCCCTAAGTCTCCTTCT      |
| miR-18a-3  | GTCTTTGTGCTAAGTGCATCTAGTGCAGATAGTAAATAGACTAGCACCTACTGCCCTAAGTCTCCTTCTGGCATAAGGGG            | -31.3  | miR-18a-5p    | miR-18a-3p    | TAAGGTGCATCTAGTGCAGATA  | ACTGCCCTAAGTCTCCTTCT      |

|            |                                                                                           |        |               |              |                         |                               |
|------------|-------------------------------------------------------------------------------------------|--------|---------------|--------------|-------------------------|-------------------------------|
| miR-190-1  | GGGCTCTGCTGATATGTTTGATATATTAGGTTGTTATTTCAGTCCCAACTGTATATCAAACATATTCTACAGTGTCCC            | -30.8  | miR-190-5p    | miR-190-3p   | TGATATGTTTGATATATTAGG   | ACTGTATATCAAACATATTCC<br>T    |
| miR-190-2  | GGGCTCTGCTGATATGTTTGATATATTAGGTTGTTATTTCAGTCCCAACTGTATATCAAACATATTCTACAGTGTCCC            | -30.8  | miR-190-5p    | miR-190-3p   | TGATATGTTTGATATATTAGG   | ACTGTATATCAAACATATTCC<br>T    |
| miR-193    | TGCTGAGGCTGGGCTTTGCGGGCAAGGTGAGTCTCAGTTAATTCACACTGGCCACAAAGTCCCAGTTTCTGGCTCA              | -36.8  | miR-193-5p    | miR-193-3p   | TGGGCTTTGCGGGCAAGGTGA   | AACTGGCCACAAAGTCCCA<br>GT     |
| miR-194    | GCTTGCTGGCTGTAACAGCAACTCCATGTGGAATCTCTGCTGTTCCAGTGGAAAGTGTCTTACCTGCAGAGAGCT               | -34.9  | miR-194-5p    | -            | TGTAACAGCAACTCCATGTGGA  | -                             |
| miR-196a-1 | TCGAGTGGTTAGGTAGTTTCATGTTGTTGGGGTCCATTTCAATCTCTGCAACATGAAACTGTCTTAATTGCCCA                | -31.2  | miR-196a-1-5p | -            | TAGGTAGTTTCATGTTGTTGGG  | -                             |
| miR-196a-2 | AAGCGTGGTTAGGTAGTTTCATGTTGTTGGGGTGGCTTCTGGCTCGGCAACAAGAAACTGCCTTGATTACGTCA                | -38.6  | miR-196a-2-5p | miR-196a-3p  | TAGGTAGTTTCATGTTGTTGGG  | ACTGTATATCAAACATATTCC<br>TA   |
| miR-196a-3 | GGGCTCTGCTGATATGTTTGATATATTAGGTTGTTATTTCAGTCCCAACTGTATATCAAACATATTCTACAGTGTCCC            | -30.8  | miR-196a-3-5p | miR-196a-3p  | TGATATGTTTGATATATTAGG   | ACTGTATATCAAACATATTCC<br>TA   |
| miR-196b   | TTGTGTGATGATAGGTAGTTTCAAGTTGTTGGGCTGGATTGTTAAGATCACAGGAACCTGAAACTGCCTGAATCACACCA          | -35    | miR-196b-5p   | -            | TAGGTAGTTTCAAGTTGTTGGG  | -                             |
| miR-199a-1 | CCCCGCTGCCAGTGTTCAGACTACCTGTTTCATCAGGCTACAGCTGAACAGTAGTCTGCACATTGGTTAGGCTGGGCTG           | -44    | miR-199a-5p   | miR-199a-3p  | CCCAGTGTTCAGACTACCTGTTT | ACAGTAGTCTGCACATTGGT<br>TA    |
| miR-199a-2 | GCTCCGTCACCCAGTGTTCAGACTACCTGTTTCATGTCATACTGGTGTACAGTAGTCTGCACATTGGTTAGACTGGGCAT          | -36.5  | miR-199a-5p   | miR-199a-3p  | CCCAGTGTTCAGACTACCTGTTT | ACAGTAGTCTGCACATTGGT<br>TA    |
| miR-199a-3 | AGCCCGCTGCCAGTGTTCAGACTACCTGTTTCAGGAAGTAGTGGTGTACAGTAGTCTGCACATTGGTTAGGCTGGCTGG           | -40.3  | miR-199a-5p   | miR-199a-3p  | CCCAGTGTTCAGACTACCTGTTT | ACAGTAGTCTGCACATTGGT<br>TA    |
| miR-199a-4 | GCTCCGTCATCCAGTGTTCAGACTACCTGTTTCAGGATCTTACTGGTGTACAGTAGTCTGCACATTGGTTAGACTGTGCAA         | -33.2  | miR-199a-5p   | miR-199a-3p  | CCCAGTGTTCAGACTACCTGTTT | ACAGTAGTCTGCACATTGGT<br>TA    |
| miR-19a-1  | TTCTCTGTAGTTTTGCATAGCTGCACTACAAGAATAGACGAGTTGTGCAAACTATGCAAAAATGATGGTG                    | -33.53 | -             | miR-19a-3p   | -                       | TGTGCAAAACCCATGCAAAAAC<br>TG  |
| miR-19a-2  | GTTCTCTGTAGTTTTGCATAGCTGCACTACAAGAATAGACGAGTTGTGCAAACTATGCAAAAAGCAGGAGT                   | -33.8  | -             | miR-19a-3p   | -                       | TGTGCAAAACCCATGCAAAAAC<br>TG  |
| miR-19b-1  | TCACTTGGTCAGTTTTGCTGGTTTGCATTCCGCTTAACTGATGTTTGTGTGCAAACTCATGCAAAAAGTACTAGGTTGA           | -38.5  | miR-19b-5p    | miR-19b-3p   | AGTTTTGCTGGTTTGCATTCCGC | TGTGCAAAACCCATGCAAAAAC<br>TG  |
| miR-19b-2  | AGTCTCTGGTTAGTTTTGCTGGTTTGCATTCCGCTTAACTGATGTTTGTGTGCAAACTCATGCAAAAAGTACTAGGTTGA          | -34.02 | miR-19b-5p    | miR-19b-3p   | AGTTTTGCTGGTTTGCATTCCGC | TGTGCAAAACCCATGCAAAAAC<br>TG  |
| miR-19d    | TGACCCCTGGCCAGCTTTGACAGGGTGGGAGTGCAGCTGTGTGCGTTAGGAGCAGCTGTGCAAAACCCATGCAAAAAGTACTAGGTTGA | -35.2  | -             | miR-19d-3p   | -                       | TGTGCAAAACCCATGCAAAAAC<br>TGA |
| miR-1a-1   | ATTACCTCTTAGTGTACGACTCTTTTATGTACCCATATGAACATGATAGCTATGGAATGTAAGAAGTATGATTTCTTGGTGAG       | -28.72 | miR-1a-5p     | miR-1a-3p    | ACGTAATCTTTATGTACCCA    | TGGAATGTAAGAAGTATGT<br>AT     |
| miR-1a-2   | GCCTGCTGGGGACATACTCTTTATATGCCATATGAACAAGAGCAACTATGGAATGTAAGAAGTATGATATCCAGGTTGG           | -39.6  | miR-1a-5p     | miR-1a-3p    | ACGTAATCTTTATGTACCCA    | TGGAATGTAAGAAGTATGT<br>AT     |
| miR-200a   | TCTCAGGATCCATCTTACCCGACAGTGTGATGTTGACAGTGTGTTGTTCTAACAAGTGTGTAACAGTATGTTTCTGGGT           | -35.2  | -             | miR-200a-3p  | -                       | TAACACTGTCTGGTAACGAT<br>G     |
| miR-200b   | GGTATTATCTCCATCTTACGAGGCAGCATTGGAATTCATCACTTTCTCTAATACTGCCTGTAATGATGATAGTACAT             | -34.52 | miR-200b-5p   | miR-200b-3p  | TAATACTGCCTGGTAATGATGA  | CATCTTACGAGGCAGCATTG<br>GA    |
| miR-202    | CTGTTCTTTTCTCTATACATACCTTTTGGAGATGATGCTTTAAAGAGCCATAGGGCATGGGAAATGGGGCT                   | -32.7  | miR-202-5p    | miR-202-3p   | TTCCCTATGCATACCTTTTGG   | AAAGAGGCATAGGGCATGG<br>GA     |
| miR-204-1  | ACCTGGGATTCCTTTGTCATCCTATGCTGGAGCTCAAATGAGGCAAGGACCAAAAGGGTGTCTCAATTGT                    | -29.6  | miR-204-5p    | -            | TTCCCTTTGTCATCCTATGCCTG | -                             |
| miR-204-2  | ACCTATGGACTTCCCTTTGTCATCCTATGCTGGAGCTATACAAAAGGGCTGGGAAGGCAAAAGGACGCCCATGTTGT             | -31.66 | miR-204-5p    | -            | TTCCCTTTGTCATCCTATGCCTG | -                             |
| miR-205-1  | ATGATTCTATCCTTCACTCCACCGAGTCTGTGTAAGTGCCAATCAGATTTTCAGTGGTTTGAAGAGTAAACGCATG              | -26.7  | miR-205-5p    | -            | TCCTTCATCCACCGAGTCTGT   | -                             |
| miR-205-2  | ATGATTCTATCCTTCACTCCACCGAGTCTGTGTAAGTGCCAATCAGATTTTCAGTGGTTTGAAGAGTAAACGCATG              | -27.24 | miR-205-5p    | -            | TCCTTCATCCACCGAGTCTGT   | -                             |
| miR-206    | GCCCTTGTGAGGACATGCTTCTTATATCCCATATTAATACACCCTTATGGAATGTAAGGAAGTGTGGTTTCAAGGGG             | -38.02 | -             | miR-206-3p   | -                       | TGGAATGTAAGGAAGTGTGT<br>GG    |
| miR-20a-1  | TCAGTAGTATTAAGTGCTTATAGTGCAGGTAGTTTTTATGAAATCTACTGCAATTGAGCACTTAAAGTACTTCTAGAT            | -32.1  | miR-20a-5p    | miR-20a-1-3p | TAAAGTGCTTATAGTGCAGGTAG | ACTGCATTGTGAGCACTTAA          |
| miR-20a-2  | CAGTGTGTGATAAAGTGCTTACAGTGCAGGTAGTATGATAACCTGGCCACTGCAAGTGTGAGCACTTCTTCCACGCTGG           | -38.8  | miR-20a-5p    | miR-20a-2-3p | TAAAGTGCTTATAGTGCAGGTAG | TACTGCAGTGTGAGCACTTCT<br>T    |
| miR-20a-3  | TCAGCAGTAAAGTGCTTATAGTGCAGGTAGTTTTTCTCTATCTACTGCAATGTGAGCACTTGAAGTACTTCTAACT              | -30.84 | miR-20a-5p    | miR-20a-3-3p | TAAAGTGCTTATAGTGCAGGTAG | CTGCAATGTGAGCACTTGA<br>GT     |
| miR-210    | AAAGCAGGTAAGCCACTGACTAACGCACATTTGCTGCTGCCAGTCCACTGTGCGTGTGACAGCGGCTAACCTGGTTTTG           | -34    | miR-210-5p    | miR-210-3p   | AGCCACTGACTAACGCACATTTG | CTGTGCGTGTGACAGCGGCT<br>AA    |
| miR-21-1   | GCCTGTACATAGCTTATCAGACTGGTGTGGCTGTTAGATTGCAAGGCGACACAGCTGTAGGCTGTCTGACATTTT               | -36.9  | miR-21-5p     | miR-21-3p    | TAGCTTATCAGACTGGTGTGG   | CGACAACAGCTGTAGGCTG<br>T      |
| miR-21-2   | CCTTGTGCTAGCTTATCAGACTGGTGTGGCTGTTTATGACACGGCAGCAGCAGTCTGTAAGCTGGCTGACGTTGTGGG            | -48.9  | miR-21-5p     | miR-21-3p    | TAGCTTATCAGACTGGTGTGG   | CGACAACAGCTGTAGGCTG<br>T      |
| miR-214-1  | GTGGTGTGCTGCTGTCTACACTGTGCTGCAGACCTTCTGCTCTGTACAGCAGGCACAGACAGGACAGATGGCA                 | -49.4  | miR-214-5p    | miR-214-1-3p | TGCCTGTCTACACTGTGCTGTC  | TACAGCAGGCACAGACAGGC<br>AG    |
| miR-214-2  | TGCAGTGTGCTGCTATCTCCACTTGTGCTGCAGAAATCTCCAACCTGTACAGCAGGCACAGACAGCAGATAGACAACA            | -34.82 | miR-214-5p    | miR-214-2-3p | TGCCTGTCTACACTGTGCTGTC  | ACAGCAGGCACAGACAGGC<br>AG     |

|             |                                                                                                       |        |              |              |                         |                             |
|-------------|-------------------------------------------------------------------------------------------------------|--------|--------------|--------------|-------------------------|-----------------------------|
| miR-215     | GCACAAGGTGATGACCTATGAATTGACAGCCAGTGATTGTAACATCTGCCTGTGAGTCTGTAGGCCACTGCTGCG                           | -29.2  | miR-215-5p   | -            | ATGACCTATGAATTGACAGC    | -                           |
| miR-217-1   | ATGTGGTGATACTGCATCAGGAAGTATTGGCTGATGCTCAGTAGCCAAACAGTACCTGATGCATTACCATCAGCATC                         | -37.5  | miR-217-1-5p | -            | TACTGCATCAGGAAGTATTGGC  | -                           |
| miR-217-2   | ATGCTGATGGTAATGCATCAGGACTGTTGGCTACTGAGCATCAGCAATCAGTTCCTGATGCAGTATCACCACATC                           | -33.3  | miR-217-2-5p | -            | TAATGCATCAGGACTGTTGGC   | -                           |
| miR-2184-1  | TTGGGCTCTGAACAGTAAGAGTTTATGTGCTGTAGAAAGAAGCTCAGCATGTAGAGTCTTACAGTGCAGAGACAAAGACCAGG                   | -31.3  | miR-2184-5p  | -            | AACAGTAAGAGTTTATGTGCTG  | -                           |
| miR-2184-2  | CTCAGCCCTGAACAGTAAGAGTTTATGTGCTGTTGTCTACCTGTGACACATGAGCTTTTACGGTGCAGGGAGGCGAGG                        | -38.4  | miR-2184-5p  | -            | AACAGTAAGAGTTTATGTGCTG  | -                           |
| miR-2187    | GATTCTGGCTTTAATTAGTATAGCCTGTTTTAGTGATATCAGCAATCTTTACAGGCTATGCTAATCTGTGCCAGAATC                        | -36.4  | miR-2187-5p  | miR-2187-3p  | TTAATTAGTATAGCCTGTTTTAG | TTTACAGGCTATGCTAATCTG       |
| miR-2188    | TGGTGTGGGAAAGTCCAACCTCACATGTCTGTGCGGCTGAAGGAAGGCTGTGTGAGGTCAGACCTATCCACACGGC                          | -42.7  | miR-2188-5p  | miR-2188-3p  | AAGTCCAACCTCACATGTCT    | GCTGTGAGGTCAGACCTA<br>T     |
| miR-218a-1  | GGTTGTTCTTTGTGCTTATTAACCATGTGGCTGCCAGGTTCTATAGTGAACATGTTCTGTCAAGCACCATGGAACGGCCA                      | -44.4  | miR-218a-5p  | -            | TTGTGCTTATTAACCATGTG    | -                           |
| miR-218a-2  | CAGCTGTCTTGTGCTTATTAACCATGTGGCCCCGCCTATTGTGACATCACATGGTCCGTCAAGCGCCAGGACCGCCA                         | -40.8  | miR-218a-5p  | -            | TTGTGCTTATTAACCATGTG    | -                           |
| miR-2201-1  | CTTTCACAACCTGTCTGAGAAGCTGGATGCATGACTGTGTGGCTGATTGCACCCGTAGCTATGGAAGAGTGTGGGGC                         | -22.6  | miR-2201-5p  | -            | TGCTGTAGAAGCTGGATGCAT   | -                           |
| miR-2201-10 | CTTTCACAACCTGTCTGAGAAGCTGGATGCATGACTGTGTGGCTGATTGCACCCGTAGCTATGGAAGAGTGTGGGGC                         | -23.3  | miR-2201-5p  | -            | TGCTGTAGAAGCTGGATGCAT   | -                           |
| miR-2201-11 | TCCCATCATGGCACCATGCTGGAGTTTGTGAGTTCTGAAAGCGACTGATCCTTTTACAACCTGTCTGAGAAGCTGGATGCATGCTGGGT<br>GGTT     | -25.5  | miR-2201-5p  | -            | TGCTGTAGAAGCTGGATGCAT   | -                           |
| miR-2201-12 | GGACCACGCGGGGGGGCCATGCTGGAGTTTGTGAGATCCTGAGAGCGACTGATCCTTTACAACCTGTCTGAGAAGCTGGATGCATGCT<br>TGGGTGGTT | -32.9  | miR-2201-5p  | -            | TGCTGTAGAAGCTGGATGCAT   | -                           |
| miR-2201-13 | TCCCATCATGGCACCATGCTGGAGTTTATTGAGATCCTGAGAGTACTGATCCTGTCAACCTGTCTGAGAAGCTGGATGCATGCTGGG<br>TGGTT      | -27.1  | miR-2201-5p  | -            | TGCTGTAGAAGCTGGATGCAT   | -                           |
| miR-2201-2  | CTTTCATAACTGTCTGAGAAGCTGGATGCATGATAGTGGTGTGATTGCATGCACCCGTAGCTATGGAAGAGTGTGGGGC                       | -27.1  | miR-2201-5p  | -            | TGCTGTAGAAGCTGGATGCAT   | -                           |
| miR-2201-3  | CTTTCACAACCTGTCTGAGAAGCTGGATGCATGATAGTGGTGTGATTGCATGCACCCGTAGCTATGGAAGAGTGTGGGGC                      | -27.8  | miR-2201-5p  | -            | TGCTGTAGAAGCTGGATGCAT   | -                           |
| miR-2201-4  | CTTTCACAACCTGTCTGAGAAGCTGGATGCATGCTGGTGGTGTGATTGCACCTGTAGCTATGGAAGAGTGTGGGGC                          | -24.4  | miR-2201-5p  | -            | TGCTGTAGAAGCTGGATGCAT   | -                           |
| miR-2201-5  | CTTTCACAGCTGTCTGAGAAGCTGGATGCATGCTGGTGGTGTGATTGCACCCGTAGCTACGGAAGAGTGTGGGGC                           | -27    | miR-2201-5p  | -            | TGCTGTAGAAGCTGGATGCAT   | -                           |
| miR-2201-6  | CTTTCACAACCTGTCTGAGAAGCTGGATGCATGCTGGTGGTGTGATTGCACCCGTAGCTATGGAAGAGTGTGGGGC                          | -21.3  | miR-2201-5p  | -            | TGCTGTAGAAGCTGGATGCAT   | -                           |
| miR-2201-7  | CCAACACAACCTGTCTGAGAAGCTGGATGCATGCTGGTGGTGTGATTGCACCCGTAGCTATGGAAGAGTGTGGGGC                          | -23.1  | miR-2201-5p  | -            | TGCTGTAGAAGCTGGATGCAT   | -                           |
| miR-2201-8  | CTTTCACAGCTGTCTGAGAAGCTGGATGCATGCTGGTGGTGTGATTGCACCCGTAGCTATGGAAGAGTGTGGGGC                           | -23.4  | miR-2201-5p  | -            | TGCTGTAGAAGCTGGATGCAT   | -                           |
| miR-2201-9  | CTTTCACAACCTGTCTGAGAAGCTGGATGCATGCTGGTGGTGTGATTGCACCCGTAGCTATGGAAGAGTGTGGGGC                          | -24.4  | miR-2201-5p  | -            | TGCTGTAGAAGCTGGATGCAT   | -                           |
| miR-221     | TTTGTCTGAACTGGCATAACAATGTAGATTCTGTGTGGTTCATTTACAGCTACATTTGCTGTGGGTTTACAGGCTAGCA                       | -34.6  | miR-221-5p   | miR-221-3p   | ACCTGGCATAACAATGTAGATT  | AGTACATTGTCTGTGGGTT         |
| miR-22a-1   | GACACACAGCAGTTCTCACTGGCAAGCTTTATGTTCTCTGTACACATGCTAAAGCTGCCAGCTGAAGAAGTCTCTGGTGCAG                    | -43    | miR-22a-5p   | miR-22a-1-3p | AGTTCTCACTGGCAAGCTTTA   | AAGCTGCCAGCTGAAGAAGT<br>G   |
| miR-22a-2   | GACCTACAGCAGTTCTCACTGGCAAGCTTTATGTTCTCTGTACACATGCTAAAGCTGCCAGCTGAAGAAGTCTCTGGTGGC                     | -42.2  | miR-22a-5p   | miR-22a-2-3p | AGTTCTCACTGGCAAGCTTTA   | AAGCTGCCAGCTGAAGAAGT<br>GT  |
| miR-222a-1  | CCCCAGCGGCTGCTCAGTAGTCAGTGTAGATCCTGTGGGGCTGGCAGCAGCTACATCTGGCTACTGGTCTCTGCTGGCAG                      | -43.9  | miR-222a-5p  | miR-222a-3p  | TGCTCAGTAGTCAGTGTAGATC  | AGTACATCTGGCTACTGGG<br>TCT  |
| miR-222a-2  | TGCTGTCAAGTGTCTCAGTAGGCAGTGTAGATCCTGTGTAGCAATCAGCAGCTACATCTGGCTACTGGTCTCTGACGGCTC                     | -42.8  | miR-222a-5p  | miR-222a-3p  | TGCTCAGTAGTCAGTGTAGATC  | AGTACATCTGGCTACTGGG<br>TCT  |
| miR-2291    | GCATTGACCTGCAGGGTGGTGTGATGATGCAGAGCGGAGGAGTCCGTGGTCTGAAGGAGCGACTGAGGCGAGGAGGAATGA                     | -21.8  | -            | miR-2291-3p  | -                       | TCTGAAGGAGCGACTGAGGC<br>GAG |
| miR-22b     | CGTTACCTCACAGTCTTTCACTGGCTAGCTTTATGTCGCCAGCCTCAGCTAAAGCTGCCAGTGAAGAGCTGTTGTGTGAAC                     | -38.1  | -            | miR-22b-3p   | -                       | AAGCTGCCAGTGAAGAGCT<br>GT   |
| miR-23a-1   | TGTGGTGGGAGGGTCTCTGGCAGCGTATTGATGAATAAAGAGATATAAAAATCACATTTGCCAGGATTTCACCTCCTTAC                      | -33.41 | -            | miR-23a-3p   | -                       | ATCACATTGCCAGGATTTC<br>C    |
| miR-23a-2   | TTGGCTGGAGGGAATCCTGGCAGAGTGAATTTGGTCAATGTAATGTAATACATTTGCCAGGATTTCACACAGCTTC                          | -39.8  | -            | miR-23a-3p   | -                       | ATCACATTGCCAGGATTTC<br>C    |
| miR-23a-3   | TGTTGACCAGGGGAATCCTGGCAGAGTGAATTTGAGACTACAGCTAAATCACATTTGCCAGGATTTCACATGGCTGAC                        | -37.3  | -            | miR-23a-3p   | -                       | ATCACATTGCCAGGATTTC<br>C    |
| miR-23b-1   | GTGGCTGTGGGCTCTGGCATGATGATTGGGACAGACAATAAAAATCACATTTGCCAGGATTACTACATGCTA                              | -32.24 | miR-23b-5p   | miR-23b-3p   | AGGGTCTGGCGTGTGATT      | ATCACATTGCCAGGATTAC<br>CA   |
| miR-23b-2   | TGGCTGTGAGGGTCTCTGGCGTCTGATTGTGACTTATGATAAAAATCACATTTGCCAGGATTACCACACAGGCT                            | -34.62 | miR-23b-5p   | miR-23b-3p   | AGGGTCTGGCGTGTGATT      | ATCACATTGCCAGGATTAC<br>CA   |
| miR-2476    | ATCTAGTGGTCCCATATGGTCTAGCGGTTAGGATTCCTGGTTTTGCGCTGGTGTGACTCCTGGTATGGAACTACTTTAG                       | -32.4  | miR-2476-5p  | -            | TCCCATATGGTCTAGCGGTTAG  | -                           |



|            |                                                                                       |        |              |              |                         |                        |
|------------|---------------------------------------------------------------------------------------|--------|--------------|--------------|-------------------------|------------------------|
| miR-25     | TGGTGTGAGAGGCGGAGACTTGGGCAATTGCCAGCCATCCCAGAGGGCATTGCACCTGTCTCGGTCTGACAGTGCCGGC       | -34.6  | miR-25-5p    | miR-25-3p    | AGGCGGAGACTTGGGCAATTG   | CATTGCACCTGTCTCGGTCTGA |
| miR-26b    | CTGGGCGCTGATTCAGTAATCCAGGATAGGTTTGTTCAGACAAGTACAGCCTATCCCGGATGACTTGGTTCAGGAACGC       | -34.6  | -            | miR-26b-3p   | -                       | TTCAAGTAATCCAGGATAGG   |
| miR-26a-1  | CTGGGCTGTCTTCAAGTAATCCAGGATAGGCTTGTAAAGTGGGGGAAGCCTATTCCAGGATGACTTGGTTCAGAAACAA       | -35.6  | miR-26a-5p   | -            | TTCAAGTAATCCAGGATAGGCT  |                        |
| miR-26a-2  | TGTAACCTGGTTCAGTAATCCAGGATAGGCTTCTGTACCTGCTTTGGCCTATGCTTGATTACTTGCCTTGGGGCAGC         | -35.2  | miR-26a-5p   | miR-26a-2-3p | TTCAAGTAATCCAGGATAGGCT  | CCTATGCTTACTTCTGCGCT   |
| miR-26a-3  | TGTGATTCAAGTAATCCAGGATAGGCTGTGTATTCTGTGGCCTATTGATGACTTGCCTGGGGCAGC                    | -35.5  | miR-26a-5p   | miR-26a-3-3p | TTCAAGTAATCCAGGATAGGCT  | CCTATTCATGACTTGCACCT   |
| miR-27a    | TGGTTGAAGTGCAGGACTTAGCTTGTCCGTGAACAGTTCAGTGAACCTGTGTTACAGTGGCTAAGTCCGCTCCTCACAAG      | -28.5  | -            | miR-27a-3p   | -                       | TTCACAGTGGCTAAGTCCGC   |
| miR-27b    | AGCTAGGCACAGAGCTTAGCTGATTGGTGAACAGTATTGATTTCTCTTTGTTACAGTGGCTAAGTTCGCACCTGAGGAGA      | -33.3  | miR-27b-5p   | miR-27b-3p   | AGAGCTTAGCTGATTGGTGAAC  | TTCACAGTGGCTAAGTTCGCA  |
| miR-27c    | TGCGCGCAGCAGGACTTAACCCACGTGTGAACAGTATGTGTTACCATTGTTACAGTGGTAAAGTTCGCCACACCGG          | -40.6  | miR-27c-5p   | miR-27c-3p   | CAGGACTTAACCCACGTGAAC   | TTCACAGTGGTAAAGTTCGC   |
| miR-27d-1  | CTATGTGTTTTCACAGTGGCTAAGTTCAGTGCCTGAGGTGAATAGTTGATTCGATGGAGTGGATTTGTTCCGGTGAAGAAAGAAC | -18.5  | miR-27d-5p   | -            | TTCACAGTGGCTAAGTTCAGT   | -                      |
| miR-27d-2  | TTCAAGATGCAGAGCTTAGCTCATTAGTGAGCATTGAACCAACAGGAATTGTTACAGTGGCTAAGTTCAGTGTCTGACATG     | -32.5  | miR-27d-5p   | -            | TTCACAGTGGCTAAGTTCAGT   | -                      |
| miR-29a    | TCCAAGTTGACCGATTTCTTTGGTGTTCAGAGTCTGCTTTGTTTCTAGCACCATTGAAATCGGTTACAGTGAAGGA          | -29.1  | miR-29a-5p   | miR-29a-3p   | ACCGATTTCTTTGGTGTTCAGA  | TAGCACATTTGAAATCGGTTA  |
| miR-29b-1  | TCCCCAGAAACTGGTTTCAGATGGTGTCTTAGAGTAAATCTCATCTAGCACCATTGAAATCGGTTCTTGAGCAG            | -33.5  | miR-29b-1-5p | miR-29b-1-3p | ACTGGTTTCAGATGGTGTCTAGA | TAGCACATTTGAAATCGGTTG  |
| miR-29b-2  | CCCTTGAAGCTGTTTCAGATGGTGGCATAGATATGTCACCTGTCTAGCACCATTGAAATCAGTGTCTTGGGGCG            | -35.6  | miR-29b-2-5p | miR-29b-2-3p | CTGGTTTCAGATGGTGGCATAGA | TAGCACATTTGAAATCAGTGT  |
| miR-29c-1  | TCTCAACAGCTGACCGTTTCTCTGGTGTTCAGAGTTCATCATGTCTAGCACCATTGAAATCGGTTACAATGTTGAG          | -24.1  | -            | miR-29c-3p   | -                       | TAGCACATTTGAAATCGGTTA  |
| miR-29c-2  | CCACAAAAGATAACTGATTTCTCTGGTGTCTAGAGCTACTACAGCCTTCTAGCACCATTGAAATCGGTTATAAAACTGTG      | -31.3  | -            | miR-29c-3p   | -                       | TAGCACATTTGAAATCGGTTA  |
| miR-29c-3  | CTCTCAAGTTGACCGATTTCTTTGGTGTTCAGAGTCTGCTTTGTTTCTAGCACCATTGAAATCGGTTACAGTGAAGGA        | -30.6  | -            | miR-29c-3p   | -                       | TAGCACATTTGAAATCGGTTA  |
| miR-29d-1  | CCCCAAGAAGCTGTTTTCAGTGGTGTGATGTTGTTCTGTTCTAGCACCATTGAAATCAGTGTCTTGGGGAG               | -40.2  | miR-29d-1-5p | miR-29d-1-3p | CTGGTTTCAGTGGTGTGTTAGA  | TAGCACATTTGAAATCAGTGT  |
| miR-29d-2  | TGCACTCAGAACTGATTTTCATTTGGTGGCATAGATGTTGTAAGTCTCTAGCACCATTGAAATCAGTGTCTTGGGACGT       | -33.5  | -            | miR-29d-2-3p | CTGGTTTCAGTGGTGTGTTAGA  | TAGCACATTTGAAATCAGTGT  |
| miR-301a-1 | AGAGGTCAGCTGTTTTCAGATGTTGCACTACTGTACCATCCGCTAAAGCAGTGAATAGTATTGTCATAGCATTGGCCTT       | -29.94 | -            | miR-301a-3p  | -                       | CAGTGAATAGTATTGTCATAGC |
| miR-301a-2 | GAGGTCAGCTGTTTTCAGATGTTGCACTACTGTACCATCCGCTAAAGCAGTGAATAGTATTGTCATAGCATTGGCCTT        | -31.8  | -            | miR-301a-3p  | -                       | CAGTGAATAGTATTGTCATAGC |
| miR-301b   | GGTCAGCTGTTTTCAGATGTTGCACTACTGTACCATCCGCTAAAGCAGTGAATAGTATTGTCATAGCATTGGCCTT          | -27.94 | miR-301b-5p  | miR-301b-3p  | TTTGACGATGTTGCACTACTG   | CAGTGAATAGTATTGTCATAGC |
| miR-301c-1 | AGGTCAGCTGTTTTCAGATGTTGCACTACTGTACCATCCGCTAAAGCAGTGAATAGTATTGTCATAGCATTGGCCTT         | -31.8  | -            | miR-301c-3p  | -                       | CAGTGAATAGTATTGTCATAGC |
| miR-301c-2 | GAGGTCAGCTGTTTTCAGATGTTGCACTACTGTACCATCCGCTAAAGCAGTGAATAGTATTGTCATAGCATTGGCCTT        | -28.74 | -            | miR-301c-3p  | -                       | CAGTGAATAGTATTGTCATAGC |
| miR-30b    | ACTCAGTTCATGTAACATCCTACACTCAGCTGTAATCATTGACAGCAGAGGCTGAGAGAAGTTGTTACTTGAACCTGGCT      | -34    | miR-30b-5p   | miR-30b-3p   | TGTAACATCCTACACTCAGCT   | CTGAGAGAAGTTGTTACTT    |
| miR-30c-1  | TCTCCAGGCATGTAACATCCTACACTCAGCTGTTGTCATGGAGCTGGGAGAGGGGTGTTTACACTTCTGGTG              | -37.9  | miR-30c-1-5p | miR-30c-1-3p | TGTAACATCCTACACTCCTCAGC | CTGGGAGAGGGGTGTTTAC    |
| miR-30c-2  | TTCCAGGTAGTGAACATCCTACACTCAGCTGTTGTCATGGAGCTGGGAGAGGGGTGTTTACACTTCTGGTG               | -45.3  | miR-30c-2-5p | miR-30c-2-3p | TGTAACATCCTACACTCCTCGG  | CGGGAGTGGGACTGTTTGA    |
| miR-30d    | ATTTTGGGCTGTAACATCCTCCGACTGGAAGCTGTCTATCTGACAGCTTTCAGTGTGATGTTTGTCTTCTGCCACTGC        | -32.4  | miR-30d-5p   | miR-30d-3p   | TGTAACATCCTCCGACTGGAAG  | CTTTTCACTGATGTTTGTCT   |
| miR-30e-1  | TCAGGGCTACTGTAACATCCTTACTGGAAGCTGGTGTTCGGTCTGGGCTTTCAGTGGATGTTGACAGCAGCAACTGC         | -41.1  | miR-30e-5p   | miR-30e-3p   | TGTAACATCCTTACTGGAAG    | CTTTTCACTGATGTTTGTGCA  |
| miR-30e-2  | CTGGAGGGCTGTAACATCCTTACTGGAAGCTGGGTTTGGACGGTGAAGCTTTCAGTGGATGTTGACAGCAGCAACTGC        | -42.2  | miR-30e-5p   | miR-30e-3p   | TGTAACATCCTTACTGGAAG    | CTTTTCACTGATGTTTGTGCA  |
| miR-31     | CCAGAAAGAGCAAGATGTTGGCATAGCTTTGAGTTGAAAGCCCTGCTATGCCATCAAATGCCATTTTCTCTCCC            | -32    | miR-31-5p    | miR-31-3p    | AGGCAAGATGTTGGCATAGCTG  | GCTATGCCATCAAATGCCAT   |
| miR-33b-1  | TGGAGCTGTGGTCACTTAGTGTGCAATGCATGTTATGCTAACACCTGCAATGATCTGCTTTGCAACACAGAAGTGGCCAT      | -31.1  | miR-33b-5p   | miR-33b-3p   | GTGCATTGATGTCATTGCA     | CAATGTACCTGCAAGTGAAC   |
| miR-33b-2  | CAGAGCTGCGGTGCATTGATGTTGCATGATGTTGTTCTCAGCGGAGTGAAGCTTTCAGTGGATGTTGACAGCAGCAACTGC     | -40.1  | miR-33b-5p   | miR-33b-3p   | GTGCATTGATGTCATTGCA     | CAATGTACCTGCAAGTGAAC   |
| miR-33-3   | GGTGGCTGATGCACTTAGTGTGCAATGCATGATCTGAAAGTGCAGTGAAGTGTGCTGCAAGTGCAGTACAGAGGCT          | -41.8  | miR-33-5p    | miR-33-3p    | GTGCATTGATGTCATTGCA     | CAATGTACCTGCAAGTGAAC   |
| miR-338-1  | TGCTTCTGGAACAATCCTGGTGTCTGCTCGAGTGTCCATACAGACTCCAGCATCAGTATTTTGTGACGGGGCCA            | -37    | miR-338-5p   | miR-338-3p   | AACAATATCCTGGTGTCTGCA   | TCCAGCATCAGTATTTTGTG   |
| miR-338-2  | TGCCTCTGGAAACAATATCAGGATGCTGTCTGGGTGTAAAGCAGAACTCCAGCATCAGTATTTTGTGCCAGGGGAG          | -40.8  | miR-338-5p   | miR-338-3p   | AACAATATCCTGGTGTCTGCA   | TCCAGCATCAGTATTTTGTG   |



|           |                                                                                   |        |            |             |                         |                       |
|-----------|-----------------------------------------------------------------------------------|--------|------------|-------------|-------------------------|-----------------------|
| miR-92a-2 | CCCTTTCTGTGCAGGTTGGGAGAGGTTGCAATGCTCTATACATGTATGGTATTGCACTTGTCCCGGCCTGTGGAGGACATG | -38.9  | miR-92a-5p | miR-92a-3p  | AGTTGGGAGAGGTTGCAATGC   | TATTGCACTTGTCCCGCCTGT |
| miR-93    | TCTGGGTGCCAAAAGTGTCTTTGTGCAGGTAGCAGTCATCCAACACTGCAAAACCAGCACTTCAGGCAGACAGGT       | -32.6  | miR-93-5p  | -           | AAAAGTGTGTTTTGTGCAGGTAG | -                     |
| miR-99a   | ATTTGGCACAAACCCGTAGATCCGATCTTGTGGCCAATCTGACAGCACAAAGCTCGCCTCTGTGGGTCTTTGTCACTGT   | -25.52 | miR-99a-5p | miR-99a-3p  | AACCCGTAGATCCGATCTTGTG  | CAAGCTCGCCTCTGTGGGTC  |
| miR-9a-1  | TTTTTTTTCTCTTTGGTTATCTAGCTGTATGAGTTTATGAAATATCATAAAGCTAGAGAACCGAATGTATAAACTAA     | -21.5  | miR-9a-5p  | miR-9a-2-3p | TCTTTGGTTATCTAGCTGTATGA | TAAAGCTAGAGAACCGAATG  |
| miR-9a-2  | TCTGTTTTGTCTTTGGTTATCTAGCTGTATGAGTGAATACGTGTCATAAAGCTAGATAACCGAAAAGTAGAAATGA      | -31.5  | miR-9a-5p  | miR-9a-3p   | TCTTTGGTTATCTAGCTGTATGA | TAAAGCTAGATAACCGAAA   |
| miR-9a-3  | TCAGTTTGTCTTTGGTTATCTAGCTGTATGAGTTTTAATTCATAAAGCTAGAGAACCGAAAAGTAGAACTGAC         | -35.7  | miR-9a-5p  | miR-9a-3-3p | TCTTTGGTTATCTAGCTGTATGA | TAAAGCTAGAGAACCGAAA   |
| miR-9a-4  | TTGGTTGTTATCTTTGGTTATCTAGCTGTATGAGTGATGTACATTCCTCATAAAGCTAGATAACCGAAAAGTAACAAGAA  | -35.6  | miR-9a-5p  | miR-9a-3p   | TCTTTGGTTATCTAGCTGTATGA | TAAAGCTAGATAACCGAAA   |
| miR-9a-5  | TGGGTTGTTATCTTTGGTTATCTAGCTGTATGAGTGTCTGCTCATAAAGCTAGATAACCGAAAAGTAAAACTA         | -32.8  | miR-9a-5p  | miR-9a-3p   | TCTTTGGTTATCTAGCTGTATGA | TAAAGCTAGATAACCGAAA   |
| miR-9a-6  | TTGTCTGTTATCTTTGGTTATCTAGCTGTATGAGTGACGTACATTCCTCATAAAGCTAGATAACCGAAAAGTAACAAGAA  | -34.1  | miR-9a-5p  | miR-9a-3p   | TCTTTGGTTATCTAGCTGTATGA | TAAAGCTAGATAACCGAAA   |
| miR-9a-7  | CCTGTTCTTTCTTTGGTTATCTAGCTGTATGAGTGAATCATCCATCATAAAGCTAGATAACCGAAAAGTAGGAATGA     | -34    | miR-9a-5p  | miR-9a-3p   | TCTTTGGTTATCTAGCTGTATGA | TAAAGCTAGATAACCGAAA   |

**Supplementary Table S3 | Novel miRNA information**

| Novel ID       | Precursors                                                                                           | MFE        | Mature ID        |                  | Mature sequences          |                            |
|----------------|------------------------------------------------------------------------------------------------------|------------|------------------|------------------|---------------------------|----------------------------|
|                |                                                                                                      |            | Mature miRNA -5p | Mature miRNA -3p | Mature miRNA -5p          | Mature miRNA -3p           |
| Novel-mir-1    | CCCCGGGATCAAACCACGGGCGCTGCCAGTGCTTTTGGTCTCCCCCTCGTGGTTTGAAGAGTCGT                                    | -22.1      | Novel-mir-1-5p   | -                | AAACCACGGGCGCTGCCAG       | -                          |
| Novel-mir-2    | GAGCTGACTTAAATGAGTAAGCAGCTGATGTGCCAAAAAGTTGCAAAACATTGCCAGGCAGCTTGTGCTCATAGCAAGCCTCA                  | -22.6      | Novel-mir-2-5p   | -                | AAATGAGTAAGCAGCTGATGTGCC  | -                          |
| Novel-mir-3    | AACACCCAGAAATCAACAAAATAGTCAAGGACATGGCGAGCCCCCTGGCGTATTGTGCATAAGCTCCCTAGAAGCTTGGCTGTGATGTGAGGCTGGTGAA | -32.5      | Novel-mir-3-5p   | Novel-mir-3-3p   | AACAAAATAGTCAAGGACATGGC   | TAGAAGCTTGGCTGTGATGTGA     |
| Novel-mir-4    | CCTGCAGTAGAACACATTGAGTTGTCTGCTAGATGACGGTCTCTACAGCAGGGTGGATGGTTTTCTTTAGC                              | -20.1      | Novel-mir-4-5p   | -                | AACACATTCAGTTGTCTGCTAGA   | -                          |
| Novel-mir-5    | GGACACAGCAAAACATGTGGAAGAAGGTGTTCTGGTCAGGCAAAATGAACTTTTTTGGTCTACATGCAAAACGCTATGTGTGG                  | -19.2<br>6 | Novel-mir-5-5p   | -                | AACATGTGGAAGAAGGTGTTCT    | -                          |
| Novel-mir-6-1  | GCACGAAAGAAATCTCTTCAGGACTGTGCATGCGCAAGGATAAACCCAATAGCGACAGCTCTTAGAGGGAAGCCTATACAA                    | -22.3      | Novel-mir-6-5p   | -                | AATCTCTTCAGGACTGTGCATGCCG | -                          |
| Novel-mir-6-2  | GGCGCAAAAGAATCTCTTCAGGACTGTGCATGCGCGAGGATAACCCAATAGCAACAGTCTTAGAGGGCAAAAGCCT                         | -21.9<br>4 | Novel-mir-6-5p   | -                | AATCTCTTCAGGACTGTGCATGCCG | -                          |
| Novel-mir-6-3  | GGCGCAAAAGAATCTCTTCAGGACTGTGCATGCGCGAGGATAAACCCAATAGCGACAGCTCTTAGAGGGTGAAGCCT                        | -22.8<br>4 | Novel-mir-6-5p   | -                | AATCTCTTCAGGACTGTGCATGCCG | -                          |
| Novel-mir-6-4  | GGCGCAAAAGAATCTCTTCAGGACTGTGCATGCGCGAGGATAAACCCAATAGCGACAGCTCTTAGAGGGCGAAGCCT                        | -23.5      | Novel-mir-6-5p   | -                | AATCTCTTCAGGACTGTGCATGCCG | -                          |
| Novel-mir-6-5  | GGCGCAAAAGAATCTCTTCAGGACTGTGCATGCGTGAGGATAAACCCAATAGCGGACAGCTCTTAGAGGGCTACGCCT                       | -24.8      | Novel-mir-6-5p   | -                | AATCTCTTCAGGACTGTGCATGCCG | -                          |
| Novel-mir-6-6  | GGCGTGAAGAATCTCTTCAGGACTGTGCATGCGCGAGGATAAACCCAATAGCGACAGCTCTTAGAGGGCTACGCCT                         | -25.3      | Novel-mir-6-5p   | -                | AATCTCTTCAGGACTGTGCATGCCG | -                          |
| Novel-mir-6-7  | GTGCAAAAAAATCTCTTCAGGACTGTGCATGCGTGAGGATAAACCCAATAGTGACAGTTTTTAGAGGGCTATGCCA                         | -21        | Novel-mir-6-5p   | -                | AATCTCTTCAGGACTGTGCATGCCG | -                          |
| Novel-mir-7    | ATGTGAGGACACAAGGATGTGAAGCTGAACGCGTGCAATAAAATGTCTGTGCAATAACTGTGTCTTTGTCTG                             | -18.9      | Novel-mir-7-5p   | -                | ACAAGGATGTGAAGCTGAACGCG   | -                          |
| Novel-mir-8    | CCAGGCAAGAACATTTACTTTGGAGCAAGCTGCCTGGAACCTCGGCTCTCTCTGAAGTAGTGCAGTCATGGTTGA                          | -21.7      | Novel-mir-8-5p   | -                | ACATTTACTTTGGAGCAAGCTGCC  | -                          |
| Novel-mir-9    | GGGATGGACACCAGATGGAGCAGAGCAGACCTCCCCTTTTGGCCACCTCACTGCACGCATGGTCTTTATTGTCTCTTCATCCTTC                | -22.7<br>1 | Novel-mir-9-5p   | -                | ACCAGATGGAGCAGAGCAGAGCAC  | -                          |
| Novel-mir-10   | CCCGTGTAGTACCAGATGGGCGAGAGCAGACCTCCCCTTTTGGCCACCTCACTGCACGCATGGTCTTTATTGTCTCTTCATCCTTC               | -24.2      | Novel-mir-10-5p  | Novel-mir-10-3p  | ACCAGATGGGCGAGAGCAGAGCAC  | ATGGTCTGTCTTTAGCTCTTCTTCTC |
| Novel-mir-11   | ACCAAGGCTGACCGTTTTCTCTGGTGTTCAGAGTTCCATCATGTCTAGCACCAATTTGAAATCGGTTACAATGTTGAGGG                     | -22        | Novel-mir-11-5p  | -                | ACCGTTTTCTCTGGTGTTCAGAA   | -                          |
| Novel-mir-12-1 | CTTGCTAAAAACCTGTAAAAATCTGTGAGGCAGTAAGTCCATGTTGAACTGTTTACAAAAGTTTTTCTTCAGGGAATTTTTTCCAGG              | -22.1      | Novel-mir-12-5p  | -                | ACCTGTAATAATCTGTGAGGCA    | -                          |
| Novel-mir-12-2 | CTTGCTAAAAACCTGTAAAAATCTGTGAGGCAGTAAGTCCATGTTGAACTGTTTACAAAAGTTTTTCTTCAGGGAATTTTTTCCAGG              | -22.1      | Novel-mir-12-5p  | -                | ACCTGTAATAATCTGTGAGGCA    | -                          |
| Novel-mir-13   | GCGGTCAGAAACGATAGTATGGGGTGGCGTGAATATGAAAAACATGCTGAACAGGAGCTGTACGGTTCTAGAGCAG                         | -19.3      | Novel-mir-13-5p  | -                | ACGATAGTATGGGGTGGCGG      | -                          |
| Novel-mir-14   | TACTATGAGAAGTGAATCCATAGATGGTGGCTACTTCAGGTGTCTATGTGGGCTCAGTCTTTTGGCATGGTACT                           | -32.8      | Novel-mir-14-5p  | Novel-mir-14-3p  | ACTGAATCCATAGATGG         | ATCTATGGGCTCAGTCTTTTG      |
| Novel-mir-15   | CCAAAAGATAACTGATTTCTCTGGTCTTAGAGCTCACTACAGCCTTCTAGCACCAATTTGAAATCGGTTATAAAAACCTGTGGA                 | -32.2      | Novel-mir-15-5p  | -                | ACTGATTTCTCTGGTGTCTTAG    | -                          |

|                |                                                                                                        |            |                  |                  |                             |                          |
|----------------|--------------------------------------------------------------------------------------------------------|------------|------------------|------------------|-----------------------------|--------------------------|
| Novel-mir-16   | TATTTTTAAAACCTACTTGAAGACTCATTGTATGCCTTTGCATTTGATAGGCTATGAGAATGTGTTGGGCTGTGTTTGGTTGATAG                 | -19        | Novel-mir-16-5 p | -                | ACTTACTTGAAGACTCATTGTGA     | -                        |
| Novel-mir-17   | GAGCCAGGAACCTGTAGGACTGATACAGTCTTGAGCATATTCAGTTCCAGGTTGTCGGGACAC                                        | -25        | Novel-mir-17-5 p | -                | ACTTGTAGGACTGATACAGTGC      | -                        |
| Novel-mir-18   | GAAAAAATTAGAAGAAGGCATATGGACGTTGTTTTACCTAAAACCTACGGCCAGATGCCTTCTGCTAAGATTTTTTC                          | -31.7      | Novel-mir-18-5 p | Novel-mir-18-3 p | AGAAGAAGGCATATGGACGTT GT    | TACGGCCAGATGCCTTCTGCT    |
| Novel-mir-19   | TTTAGATAACAGAGAAAGAAATGTGGAATTGCTGGTTCTGTCAATTAATTTTTCCACGTTAATTTCTTTATAATTTATTAGGG                    | -18.4      | Novel-mir-19-5 p | -                | AGAGAAAGAAATGTGGAATTGCTG    | -                        |
| Novel-mir-20   | CAGAACCTCCAGAGGACGGAAGTAGAGCAGATTTTCTTCTCTCTTCTACTTCTTCTCTCTCAGGAACTTGAA                               | -23        | Novel-mir-20-5 p | -                | AGAGGACGGAAGTAGAGCAG A      | -                        |
| Novel-mir-21   | GGAGGGGCAAAGAGGAGTGGAGGGGAGAAGAGGAGGGGATACTGCCTGAGTTGTTTTGATTCTCACITTTGCTACTAACGG                      | -23        | Novel-mir-21-5 p | Novel-mir-21-3 p | AGAGGAGTGGAGGGAGAAGAG GA    | TTGTTTTGATTCTCACTTTG     |
| Novel-mir-22   | CACAGGCAGCAGATGGATGTTTACTGTGAGGAGGTGCTGGATGTGCTGACCTCTGCAGGATGGCGCTGCAAGAGCTGCAGACC                    | -29.4      | Novel-mir-22-5 p | -                | AGATGGATGTTTACTGTGAGGA GG   | -                        |
| Novel-mir-23   | GATCAGTTTCAAGCTCGGCATCTGTACATGAACGTCAAAGTCCGCGGACAGACAAGTTGTTCTGCCATCCCTGAACAGTGT                      | -18.1      | Novel-mir-23-5 p | Novel-mir-23-3 p | AGCTCGGCATCTGTACATGAAC TGCA | ACAAGTTGTTCTGCCATCCTCC   |
| Novel-mir-24   | GACCCTGGCCAGCTTTCAGGGTGGCAGTCAAGCTGTGTGCGTTAGGAGCAGCTGTGCAAAACCCATGCAAACTGACCATGGCT GGAGTTGTCA         | -35.3      | Novel-mir-24-5 p | -                | AGCTTTCAGGGTGGCAGTCA AGC    | -                        |
| Novel-mir-25   | TGGCCAACACAGGAAGAGGATGAAGACAGTGTGTTCTAGAGGATACATGAGGATCAGAGATTGCGTCCACATTTATTGAG AACGGTAC              | -19.5      | Novel-mir-25-5 p | -                | AGGAAGAGGATGAAGACAGTGA TG   | -                        |
| Novel-mir-26-1 | TGCTAGGCAGAGGAAGGACAAGTTGGCAGCCATCTGTACTGTGTGGGACAAGTGGTGGAAACGGCTTCCACTTCTATAACCCCTG GGCCCAATG        | -27.2      | Novel-mir-26-5 p | -                | AGGAAGGACAAGTTGGCAGC        | -                        |
| Novel-mir-26-2 | TGCTAGGCAGAGGAAGGACAAGTTGGCAGCCATCTGTACTGTGTGGGACAAGTGGTGGAAACGGCTTCCACTTCTATAACCCCTG GGC              | -27.9      | Novel-mir-26-5 p | -                | AGGAAGGACAAGTTGGCAGC        | -                        |
| Novel-mir-27   | GTTGAAGTGCAGGACTTAGCTTGTCCGTGAACAGTTCAGTGAACCTGTGTTTACAGTGGCTAAGTCCGCTCCTCACA                          | -28.5      | Novel-mir-27-5 p | -                | AGGACTTAGCTTGTCCGTGAA C     | -                        |
| Novel-mir-28   | CCCCGGCACCAGGCTTGAGAGCATAGCGGCCGTTCCGGAGGACGACCTCTATGCCAGGCTTGAGAGCATAGTGGCCGGTCAGGA                   | -37.6      | Novel-mir-28-5 p | -                | AGGCTTGAGAGCATAGCGGC        | -                        |
| Novel-mir-29   | TCAGTAGCAGAGGGTTGTACATTAATGAGCACCATCGACAATGCTCATATGCTCCACCCCACTGCTGTGAA                                | -25.6      | Novel-mir-29-5 p | -                | AGGGGTTGTACATTAATGAGC       | -                        |
| Novel-mir-30-1 | AAGAATACACAGGTAATGCTCTGCAGAGAGGGCAGCAGAACCCCTGGTATCTTCTACAGTCTTACCACCTCTGCAAGCGCTT GCGGTACATAGCA       | -31.5      | Novel-mir-30-5 p | -                | AGGTAATGCTCTGCAGAGAG GGC    | -                        |
| Novel-mir-30-2 | CACCCTGCGGAGGTAATGCTCTGCAGAGAGGGCAGTGGAGTCCCTTCTGATCTTCCACAGTCTTACCACCTCTGCAAGCGCT TGTGGTCCATAGCAGTAGT | -37.7<br>3 | Novel-mir-30-5 p | Novel-mir-30-3 p | AGGTAATGCTCTGCAGAGAG GGC    | CACTCTGCAGGGCTTGTGGT CCA |
| Novel-mir-31   | CTCCAGTGCAGGTGGGGATTAGTAGCAATGCTGTGACCTGGAGGATTGCACTTGTCCCGGCTGTGTAGGAAT                               | -38.8      | Novel-mir-31-5 p | -                | AGGTGGGGATTAGTAGCAATG       | -                        |
| Novel-mir-32   | CACGGAGTCGAGTATAAAGAGGAGCGAGCTAAGCACTCACTGGAGGCTAAGTGTATATGCATTGTTCTTCTGTGACCAGCAATAAA GG              | -19.7<br>2 | Novel-mir-32-5 p | Novel-mir-32-3 p | AGTATAAAGAGGAGCGAGCTAA GC   | TATGATTGTTCTTCTGTGACCA   |
| Novel-mir-33-1 | TTTAATCCGGATAAAAATTGATCCGGATTAGTAATCCTTTTTTTGCAATCCGTGATCACGTAATCCATCTTACT                             | -18.7      | Novel-mir-33-5 p | -                | ATAAAATTGATCCGGATTAGT AA    | -                        |
| Novel-mir-33-2 | TTTAATCCGGATAAAAATTGATCCGGATTAGTAATCCTTTTTTTGCGATCCGTGATCACGTAATCCAGCTTACT                             | -19.1      | Novel-mir-33-5 p | -                | ATAAAATTGATCCGGATTAGT AA    | -                        |
| Novel-mir-33-3 | TTTAATCCGGATAAAAATTGATCCGGATTAGTAATCCTTTTTTTGCGATCCGTGATCACGTAATCCATCTTACT                             | -19.1      | Novel-mir-33-5 p | -                | ATAAAATTGATCCGGATTAGT AA    | -                        |
| Novel-mir-33-4 | TTTAATCCGGATAAAAATTGATCCGGATTAGTAATCCTTTTTTTGCGATCCGTGATCACGTAATCCAGCTTACT                             | -19.1      | Novel-mir-33-5 p | -                | ATAAAATTGATCCGGATTAGT AA    | -                        |
| Novel-mir-34   | TCTCCTTCGCATAGAGTTGAATAGTTGTGCTAGTTGGCCCTGTGGAAATGTTGGTCCACTCCTCTTCAATGGCTGTGCGAACTTGCTG G             | -28.5      | Novel-mir-34-5 p | Novel-mir-34-3 p | ATAGAGTTGAATAGTTGTGCGA TT   | TCCTCTTCAATGGCTGTGCG     |
| Novel-mir-35   | TCTTCCACACATCATGGACAGGTGCTTTCCTTTGCGTCAATGACAGGAGCCTGACAGAAGGGAAGTACGACAGTCCAATGTATGAA TTT             | -29.8      | Novel-mir-35-5 p | -                | ATCATGGACAGGTGCTTTCCTT T    | -                        |
| Novel-mir-36   | TCAGGAGCTGATCTGAACAAGTGATTTCCGGAGGAAACCGATGTTGGAAGTGTGCTTCTCATTCTCCCA                                  | -22.3      | Novel-mir-36-5 p | -                | ATCTGAACAAGTGATTTCCGGA G    | -                        |
| Novel-mir-37-1 | AGTTTTGTCATGAAGTGTAGGTTGGGCTGCGAGAGAAAGCGACACTCTGAGCTGGTCAAGGTGGTGTATCCG                               | -18.3      | Novel-mir-37-5 p | -                | ATGAAGTGTAGGTTGGGCT GCG     | -                        |
| Novel-mir-37-2 | GTTATTGTCATGAAGTGTAGGTTGGGCTGCGAGGAAAGTGAACACTCTGAGCTGGTCAAGGTGGTGTATCCGGTAGACTGAAG AAGTAACA           | -20.4      | Novel-mir-37-5 p | -                | ATGAAGTGTAGGTTGGGCT GCG     | -                        |

|                |                                                                                        |            |                  |                  |                         |                          |
|----------------|----------------------------------------------------------------------------------------|------------|------------------|------------------|-------------------------|--------------------------|
| Novel-mir-38   | CGAGTGAGGAATGATCAAACGAGGAAATGGGTTTTAACCACTGGGTACATCTCAAGTCTCTTGATGATCATTCTTGTCTTT      | -43.7      | Novel-mir-38-5 p | Novel-mir-38-3 p | ATGATCAAACGAGGAAATGGG   | CAAGTCTCTTGATGATCATTCT   |
| Novel-mir-39   | ACATCCATAAAAGTCTGCTTAAAGCTGTACTGTGACTATCGCACAGTGGAATGTGACTGTGGTCAGATGAATCAGTGTGGAGGTC  | -27.2      | Novel-mir-39-5 p | -                | ATGCTGCTTAAAGCTGTACTGT  | -                        |
| Novel-mir-40   | ATTAATCCTGATGTTGCTTTGGCCACTGAGGGGTCGGTCTGATTGCAATGAATTCAGAGATACTTCATTGATAAAAGTTGGGCTA  | -20.7      | Novel-mir-40-5 p | Novel-mir-40-3 p | ATGTTGCTTTGGCCACTGAGGGG | TTGATAAAAGTTGGGCTATTAGA  |
| Novel-mir-41   | CCGCTTTGCCATGATTTTCTCCAATAAGTTCAAGTCTCTTCAAGGTTACCCCTCTTCAGGGAGATTAATGGTCTTATCCTGGGAAT | -24.7      | Novel-mir-41-5 p | Novel-mir-41-3 p | ATTTCTCCAATAAGTTCAAGTCT | TAATGGTCTTATCCTGGGAATGGC |
| Novel-mir-42-1 | TTGCAGACCAATTTGATGCAGCGTGCAGGCTATGGTCTGAGCACTGACAGGCTGACCCCCACCCCTTCAACCTCTGCAGC       | -21.6      | Novel-mir-42-5 p | -                | ATTTGATGCAGCGTGCAGGCTA  | -                        |
| Novel-mir-42-2 | TTGCAGACCAATTTGATGCAGCGTGCAGGCTATGGTCTGAGCACTGACAGGCTGACCCCCACCCCTTCAACCTCTGCAGC       | -23.9      | Novel-mir-42-5 p | -                | ATTTGATGCAGCGTGCAGGCTA  | -                        |
| Novel-mir-43   | GGCCATGGGCCAAACACGTCGAGACCCACATAGGTGACAGGAGGCTGCTGCTGTCTTCTGGTAGGTCAGACATGATTTG        | -41.8      | Novel-mir-43-5 p | -                | CAAACACGTCGAGACCCACATA  | -                        |
| Novel-mir-44   | TGTTTGGCAAATGGACGGTGCCTTGCCTTCGTGTCAAAGTGCATGCACAGAAGTTCAGGTAATCAGCCATTTAGTGAGG        | -27.4      | Novel-mir-44-5 p | -                | CAAATGGACGGTGCCTTG      | -                        |
| Novel-mir-45   | TAGGCTTAAACAAGATCTGGAGAGTTGGGAGTACTTATTGACTTGTGGCCAGACTTGGAGAAAAGTGAAGACAGC            | -19.7      | Novel-mir-45-5 p | -                | CAAGATCTGGAGAGTTGGGAG   | -                        |
| Novel-mir-46   | CCTTGTCCGGCAATTTACATACTGGGTGAAGTTGGGGAGAGAAGCATGGTTAAAGTCCCCCGAGGTAAGAATTAAGCCTGTGG    | -18.9<br>6 | Novel-mir-46-5 p | Novel-mir-46-3 p | CAATTTACATACTGGGTGAAGT  | TAAGAATTAAGCCTGTGGATGTT  |
| Novel-mir-47   | TAATGCTCCAGCCACCTTTGAGAGATTGATGGAGCGGGTCTCAAGGACATTCCAGAACCCGCTGCGTAGTTTACCTGGACGACT   | -33        | Novel-mir-47-5 p | Novel-mir-47-3 p | CACCTTTGAGAGATTGATGGAG  | GCCTGATTTACCTGGACGACTTG  |
| Novel-mir-48   | GCAGCGTCCACTGCCTGGAATCTTGTGCACCTTTCGTAGCCCGTGTAGCCGAGTTGGTAGAGCATG                     | -20.7      | Novel-mir-48-5 p | -                | CACTGCCTGGAATCTTGTCTGC  | -                        |
| Novel-mir-49   | TCCATAAACACAGATATTAAGGTGGAAGTGTGACTGAATTGCATACAATTGTACAGGTGTACCTACTAAAGTCCCGTTAGTGTA   | -18.4      | Novel-mir-49-5 p | -                | CAGATATTAAGGTGGAAGTGTG  | -                        |
| Novel-mir-50   | CCATCTACAGCAGGACTGGTTTTGGCCCTGCACCCGTCTGTCTGCTGGCTGGGAGCAGCTGCTTCTTTAT                 | -23.8      | Novel-mir-50-5 p | -                | CAGGACTGGTTTTGGCCTCTGC  | -                        |
| Novel-mir-51   | GGGCTCAAAGCAGGTGTAGAAGTGTGGAGTATCCGGCAGGCTGTCTGTGGGCTGATGATGCTGGTGGTGGTCT              | -22.4      | Novel-mir-51-5 p | Novel-mir-51-3 p | CAGGTGTAGAAGTGTGAGG     | TGTCTGTGGGCTGATGATGCTG   |
| Novel-mir-52   | CGTGTAAACAGTTGGTACATCATAGATGGAGAAGCTCGTGGCCGTGCTCCAACACGACCTACTGCTGTGAATTAACCTCATGG    | -24.2<br>2 | Novel-mir-52-5 p | -                | CAGTTGGTACATCATAGATGGA  | -                        |
| Novel-mir-53   | TACATTGCCGATTTCTCAAGGGCAAGCAGGAGCGAGTGGGATCCAGCAGGTGTCACAGATGAGGCAGGCAGACTG            | -21.1      | Novel-mir-53-5 p | -                | CATTTCTCAAGGGCAAGCAGGA  | -                        |
| Novel-mir-54   | CTGAGCAAACACAGCAGTGTGAGCAGCAGAGAACAGACTCCCTGATTCTCTGTAGAAGTGTATCGGCAGCTCCTGGA          | -21.4      | Novel-mir-54-5 p | Novel-mir-54-3 p | CCAGACAGTGTGAGCAGCA     | TTCTCTGTAGAAGTGTATCGGC   |
| Novel-mir-55   | ATAAACTGGGGCCCTGTCTGACACCACATCCCTGGGGAGACCACGCAACCGGAACACATGTAGGATGAGGAGTTGGGCTGTGT    | -33.2      | Novel-mir-55-5 p | Novel-mir-55-3 p | CCCCTGTCTGACACCACATCCC  | TAGGATGAGGAGTTGGGCTGTG   |
| Novel-mir-56   | GCTGCCGTAACCGTCTGAAGTGAATCTCCCTCCATTGAGCTGTGTCGGCTCTCCCTTAAAGGTATGTTCAACAGGCTGATTGTAG  | -22.4<br>2 | Novel-mir-56-5 p | -                | CCGGTCTGAAGTGAATCTCCCT  | -                        |
| Novel-mir-57   | CCAGGTGTGGATGCCTAGTTTAACTGTTGGCCTGGAGTGCCAAAGCCACCGTTGGGATCGACAGGGCGCTGGCTAGAAATCTGA   | -32.2      | Novel-mir-57-5 p | Novel-mir-57-3 p | CCTAGTTAACTGTTGGCCTGG   | TGGGATCGACAGGGCGCTGGCT   |
| Novel-mir-58-1 | ACCCTTCAAACCTGAGAGACCTGGAGCAGCTGGCAAAGAAGAGTGGTCCAGAATCCAGTAGAGAGGTGGA                 | -20.6      | Novel-mir-58-5 p | -                | CCTGAGAGACCTGGAGCAGCT   | -                        |
| Novel-mir-58-2 | AGCCTTCAAACCTGAGAGACCTGGAGCAGCTGGCAAAGAAGACTGGTCCAAGATCCAGTAAAGAGGTG                   | -20.3      | Novel-mir-58-5 p | -                | CCTGAGAGACCTGGAGCAGCT   | -                        |
| Novel-mir-59   | ACTCCTCCTCCTGGAGAACTGACGAGAGAGGGCATCCACCTTCCGTTAAGGCGACCTGGGCGAAAAGAGAGAGAGA           | -22.5      | Novel-mir-59-5 p | -                | CCTGGAGAAGTGGAGAGAGG    | -                        |
| Novel-mir-60   | TGGTTCTAATAAGACGAAGTTTGGCCTGGTGAATGTCGGCTCGCTGAAGAACAACCTTTATTTTGGGGACT                | -23.5      | Novel-mir-60-5 p | Novel-mir-60-3 p | CGAAGTTTGGCCTGGTGAAT    | TCGCTGAAGAACAACCTTTATT   |
| Novel-mir-61-1 | AGTGAGAAGGGGGTCCGACAGACGCTCAAGGGGACAGAGTCCAGCTGTTGAGAAGTAGCTAGTGGCTGAGCTGATA           | -18.8      | Novel-mir-61-5 p | Novel-mir-61-3 p | CGCAGAGACGTCAAGGGGGA    | GCTGTTGAGAAGTAGCTAGTGGC  |
| Novel-mir-61-2 | GAGAAGGGGGTCCGACAGACGCTCAAGGGGACAGAGTCCAGCTGTTGAGAAGTAGCTAGTGGCTGAGCTGAAA              | -18.5      | Novel-mir-61-5 p | Novel-mir-61-3 p | CGCAGAGACGTCAAGGGGGA    | GCTGTTGAGAAGTAGCTAGTGGC  |
| Novel-mir-62   | AGGTGGGATACGGGACCGGGACGCTGTCTGAGAGTCTCTATGAATCTCACAGTGAACCGGTCTCTTTTTCAGCCCTCACTCCTC   | -37.5      | Novel-mir-62-5 p | -                | CGGGACCGGGACGCTGTCTGA   | -                        |

|                |                                                                                                        |            |                     |                     |                                |                                   |
|----------------|--------------------------------------------------------------------------------------------------------|------------|---------------------|---------------------|--------------------------------|-----------------------------------|
| Novel-mir-63   | CACCCTGCGGCGGTAATACTCTGCAGAGATGGCAGTAGAGTCTGGTGATCTTCTCCGAGTCTTTAACTCTGCAGGCTTTTGC<br>GGTCCATAGCAGTA   | -33.8      | Novel-mir-63-5<br>p | -                   | CGGTAATACTCTGCAGAGATG<br>GC    | -                                 |
| Novel-mir-64-1 | CACCCTGCAGCGGTAATGCTCTGCAGAGAGGGCAGTGGAGTCTGGTGATCTTCTCAACAGTTTTACCCTCTCTGCAGGCACTT<br>GCGGTCCATAGCAGT | -38.9      | Novel-mir-64-5<br>p | -                   | CGGTAATGCTCTGCAGAGAG<br>GGC    | -                                 |
| Novel-mir-64-2 | CACCCTGCAGCGGTAATGCTCTGCAGAGAGGGCAGTGGGGTCTGGCGATCTCTCCGAGTCTTTACCCTCTCTGCAGGTGC                       | -37.1      | Novel-mir-64-5<br>p | -                   | CGGTAATGCTCTGCAGAGAG<br>GGC    | -                                 |
| Novel-mir-65   | ACCAACTGCGCTAACCGGGCTACGAAAGTGCAGCAAAGATTCCAGGCAGTGGACACGCTGCATGGTCTACCAACTTTAGCATTGA<br>ACAT          | -29.2      | Novel-mir-65-5<br>p | -                   | CTAACCGGGCTACGAAAGTGC<br>AGC   | -                                 |
| Novel-mir-66   | ACAAAGCAGCCCTAGTCTCATCCCAGACGGCTTGACAGCGAGTGTGGGCTTAGACAGAGGGGACAGCAATAT                               | -23.6      | Novel-mir-66-5<br>p | Novel-mir-66-3<br>p | CTAGTCTCATCCCAGACGGCT          | TGATGTGGGCTTAGACAGAGGGG           |
| Novel-mir-67   | TAGGTGCAGCCTCAGGAAAATAAAAGGGGAAAACATTTGGTCTTTAACTGGTGGTAAATGTCCTGGGCTTGTGGGGCTGAGGT<br>AGG             | -20.8      | Novel-mir-67-5<br>p | Novel-mir-67-3<br>p | CTCAGGAAAATAAAAGGGGAA<br>AAC   | TAAATGTCCTGGGCTTCTGTGGG<br>G      |
| Novel-mir-68   | TGTTTCATTCTCCAATTCTTTTTCTACTGTCTTTGTATGCCCTGCCACCCAGAGACACAGGATCCAAGAGGGAAGGTGGT<br>GTTCCAACT          | -20        | Novel-mir-68-5<br>p | -                   | CTCCAATTCTTTTTCTACTG           | -                                 |
| Novel-mir-69   | ACAGGCAGGGCTCCACTGGGTGATGGTCCAGTAGTTCAATCAATGGTGGGTTGTGTTGACCAGCCAGGAGTGGCCAGAACC<br>AG                | -27.8      | Novel-mir-69-5<br>p | Novel-mir-69-3<br>p | CTCCACTGGGTGATGGTGCCA<br>GTAGT | TGTGTTGGACCAGCCAGGAGTGG<br>C      |
| Novel-mir-70   | TGATTGTTCCCTCCTTTCTTTGCTTGCCTTTTGGCTTCGTGTGTTGTCTGTGCATAGTAGGCCAGTACAGCAAGGAGGGTGTAGTG<br>G            | -29.2      | Novel-mir-70-5<br>p | -                   | CTCCTTCTTTGCTTGCCTTTT          | -                                 |
| Novel-mir-71   | CTCGTAGTCTCTTAGGGCTGTAGCCTGTGCTGCTTGTGTGGGCGTGCCTGCATGTGTGTTGTGTA                                      | -19.3      | Novel-mir-71-5<br>p | -                   | CTCTTAGGGCTGTAGCCTGTGC         | -                                 |
| Novel-mir-72   | CAGTGACCTGCTGAAGATAAGTGTGAAGATGGGGCCAGCTGATCAGCATACTTTCCAGACAGGAGGTGCTGC                               | -24.3      | Novel-mir-72-5<br>p | -                   | CTGAAGATAAGTGTGAAGATGG<br>GG   | -                                 |
| Novel-mir-73   | TGATTCCTACTGGACATAATCCTGGACTGCACCAACATAGAAGGTGCGGGGTTTATGGAGAGTGGTGAAGAT                               | -21.7      | Novel-mir-73-5<br>p | -                   | CTGGACATAATCCTGGACTGCA<br>CC   | -                                 |
| Novel-mir-74   | AAAAAATCAGCTGACTAGATTTTTAGGTTGAAGCCTCTTGGATGAGAGGTGAAACGCTTCTCGACCTAGAAAATCTAGTCCAGTTGATG<br>TTTTT     | -52.7      | Novel-mir-74-5<br>p | -                   | CTGGACTAGATTTTTAGGTTGA<br>AG   | -                                 |
| Novel-mir-75   | ACAGTGTCTACTGTAATGCACTGTATGCTGGAGTTGGTCAATTGGGGCTTGCCCGCTCCAGAGGGTCCAGAATGCTGCCGCTCGG<br>TTATTGG       | -26.5      | Novel-mir-75-5<br>p | -                   | CTGTAATGCACTGTATGCTGGA<br>GT   | -                                 |
| Novel-mir-76-1 | ACTGTCTGCTGAAGTCTGACTTGTCTGTTGGTGTGCTGAGCCAAACCAGACAGTATAGAGGTGCAGAGAACAGACTCG                         | -32.1      | Novel-mir-76-5<br>p | Novel-mir-76-3<br>p | CTGTACTTGTCTGTTTGGT            | CAGACAGTATAGAGGTGCAGAG            |
| Novel-mir-76-2 | GTCCACTGAAATCTGACTTGTCTGTTTGGTGTGAGCCAAACCAGACAGTATAGAGGTGCAGAGAACAGACTCA                              | -30.9      | Novel-mir-76-5<br>p | Novel-mir-76-3<br>p | CTGTACTTGTCTGTTTGGT            | CAGACAGTATAGAGGTGCAGAG            |
| Novel-mir-76-3 | GTCCACTGAAGTCTGACTTGTCTGTTTGGTGTGAGCCAAACCAGACAGTATAGAGGTGCAGAGAACAGACTCG                              | -29.8      | Novel-mir-76-5<br>p | Novel-mir-76-3<br>p | CTGTACTTGTCTGTTTGGT            | CAGACAGTATAGAGGTGCAGAG            |
| Novel-mir-77   | GCGGGACCCTGTCAAATTAATCTGAAGAGAAGTGGTATCTTTATTGTGTGTATAAAGTTGAGTCAAGGTTGGGCTTTTT<br>GAGCAGTGGTCTAA      | -22.3      | Novel-mir-77-5<br>p | Novel-mir-77-3<br>p | CTGTCAAATTAATCTGAAGAG          | TGAGTCAAGGTTGGGCTTTTTGA<br>GC     |
| Novel-mir-78   | GACTGAGCTGTGTCGGCATACAATGGGGAACTCTCGTATCCTGTGCTGTGAAAGGCTGACTTGCCTTTGTAGTG                             | -25.3      | Novel-mir-78-5<br>p | -                   | CTGTCGGCATACAATGGGGG<br>AAC    | -                                 |
| Novel-mir-79   | CTGCTTCAGGCTGTGCATGTTTGAATGCGTGTGCTTGTGTACGCTGTATTTTGTGCACGCTCTGTTTATACAAGTGCATATCTG<br>TTAGTTGA       | -27.9      | Novel-mir-79-5<br>p | -                   | CTGTGTGCATGTTTGAATGCG<br>TG    | -                                 |
| Novel-mir-80-1 | CGAGTAGCAGCTGTTAATCATGGCCTGCACGCACATTACCTTTTACCTTATGCAGGAGTGTGGCTTGTGCTGTAGTTAGCAGCAAT<br>GACATT       | -28.6      | Novel-mir-80-5<br>p | -                   | CTGTTAATCATGGCCTGCACGC<br>A    | -                                 |
| Novel-mir-80-2 | CGAGTAGCAGCTGTTAATCATGGCCTGCACGCACATTACCTTTTACCTTATGCAGGAGTGTGGCTTGTGCTGTAGTTAGCAGCAAT<br>GACCTTGT     | -27.7<br>2 | Novel-mir-80-5<br>p | -                   | CTGTTAATCATGGCCTGCACGC<br>A    | -                                 |
| Novel-mir-80-3 | GGAGTAGCAGCTGTTAATCATGGCCTGCACGCACATTACCTCGTACTTTATGCAGGAGTGTGGCTTGTGCTGTAGTTAGCAGCAAT<br>GATGTTATGGG  | -32.1      | Novel-mir-80-5<br>p | -                   | CTGTTAATCATGGCCTGCACGC<br>A    | -                                 |
| Novel-mir-81   | GCCGTATAGCCTTGGATTGTAGCGCCCCAGCGGCTTATGTCTCTACTGCGGGCTGTTACTGGTCTTTCTACAACGAC                          | -22.3      | Novel-mir-81-5<br>p | -                   | CTTGGATTGTAGCGCCCCAG<br>G      | -                                 |
| Novel-mir-82   | AAGCAGTAGCCTTTGAGTCTGCTGGAGAGGAGCTATGTGCTGCCAAAAGGAATTAAGGGCTGTAGGCCA                                  | -18.6      | Novel-mir-82-5<br>p | -                   | CTTTGAGTCTGCTGGAGAGGA<br>GC    | -                                 |
| Novel-mir-83   | ACATCTGAGACTTTATTGGGCTTTCGGACAGCGGAGGGAGGAGGACTGTCTTACCCCTCATAGGACAAAAGGAAACGAGGGGAA<br>AAGATCAGAGTGG  | -24.3      | Novel-mir-83-5<br>p | Novel-mir-83-3<br>p | CTTTTATTGGGCTTTCGGACAG<br>CG   | TAGGACAAAAGGAAACGAGGGGAA<br>AAGAT |
| Novel-mir-84-1 | ACAAGACAAGAAGATGATAGTGGACATGAGGAAGGAGAGGAGATCTCATCAGCCACTGTTTCATCTGGGAGCTCGAAA                         | -22.9      | Novel-mir-84-5<br>p | -                   | GAAGATGATAGTGGACATGAG<br>G     | -                                 |
| Novel-mir-84-2 | ACAAGACAAGAAGATGATAGTGGACATGAGGAAGGAGAGGAGATCTCATCAGCCGCTGTTTCATCCGGGGCTCGA                            | -18.2      | Novel-mir-84-5<br>p | -                   | GAAGATGATAGTGGACATGAG<br>G     | -                                 |

|                 |                                                                                                      |            |                  |                  |                            |                           |
|-----------------|------------------------------------------------------------------------------------------------------|------------|------------------|------------------|----------------------------|---------------------------|
| Novel-mir-84-3  | ACAAGACGACGAAGATGATAGTGGACATGAGGAAGGACAGGAGATCTCATCAGCCACTGTTTCATCCGGGGGCTCGA                        | -19.4      | Novel-mir-84-5 p | -                | GAAGATGATAGTGGACATGAG G    | -                         |
| Novel-mir-85    | TGTGTTTCATTGAATAATCAGCACTGTTATGAAGTACTTGGACTGCCTCGTCTCTCAGAGTTAGTGTAGCAGAGTTGAATCCATTTGCCAT          | -19        | Novel-mir-85-5 p | -                | GAATAAATCAGCACTGTTATGAG    | -                         |
| Novel-mir-86    | GTGCCACCTGACGACCCGTGAGACTTGCCTTCACTCGTATACCCACACAGAACATGTGTTGGTGAATGTAGTTACTGACTCACTGGGTGTTA         | -21.2      | Novel-mir-86-5 p | -                | GACGACCCTGTAGACTTGCCTT     | -                         |
| Novel-mir-87    | TCGGGAGGAAGGATTGCTTAAAGCAATTTTCAGACGATTGATTCTCTGGATTGGATAACTCATATCAGGAATTGTGGGTGTTGGCCCTCTGTAG       | -26.1      | Novel-mir-87-5 p | Novel-mir-87-3 p | GACGATTGATTCTCTGGGATT GA   | TATCAGGAATTGTGGGTGTTGG    |
| Novel-mir-88-1  | AAATATCAGAGACTGATTTAATGGTACTGTGGACAGCTGAATAATTGCCCTGCCATTGTGTGCAGGCTGAGCTCT                          | -20.8      | Novel-mir-88-5 p | -                | GACTGATTTAATGGTACTGTG GA   | -                         |
| Novel-mir-88-2  | AAATATCAGAGACTGATTTAATGGTACTGTGGACAGCTGAATGATTGCCCTGCCATTGTGTGCAGGTTGTTTTTT                          | -20.9      | Novel-mir-88-5 p | -                | GACTGATTTAATGGTACTGTG GA   | -                         |
| Novel-mir-89    | TGTGCTCCTGGACTTGGTCAAAGCTCCTCAGCAGATTAAGTGACTCTGAGGCGTTTAGAACAAGTTCAGGGTCTCGGA                       | -31.7      | Novel-mir-89-5 p | Novel-mir-89-3 p | GACTTGGTCAAAGCTCCTCAG      | TGAGGCGTTTAGAACAAGTTCA    |
| Novel-mir-90    | AGACTGAAAAGAGACTGAGAACCTTCCAGGGCCGGGCACGGAGACTACGGCAAAGTTTCGCGGGCGGAGC                               | -20.3      | Novel-mir-90-5 p | -                | GAGACTGAGAACCTTCCAGGGCCGGC | -                         |
| Novel-mir-91    | CTTCAGAAAGGAGTACTTTATCGTCAGCATGGAGCAATTAAGCAGCTAGTTGTTCCCTCAGTCTGTTCCGGATGTTGTGCTTACTTTGGGTCACCT     | -27.1      | Novel-mir-91-5 p | -                | GAGTACTTTATCGTCAGCATGG AG  | -                         |
| Novel-mir-92    | AAATGCTCAGATGTTGAGTATCAAACGTATGTTATATATGTCATGTATATAGTTTGATACACAGCACAACAAGCCGTTTT                     | -30.1<br>4 | Novel-mir-92-5 p | Novel-mir-92-3 p | GATGTTGAGTATCAAACGTAT      | TAGTTTGATACACAGCACAAC     |
| Novel-mir-93-1  | TGATAGGGCCCGAGAAATGACTGGACCCTGGAGGAGCCGCCGGGGTCGGAGGAGAGGTTTTGGCACTACGTAT                            | -19.7      | Novel-mir-93-5 p | Novel-mir-93-3 p | GCAGAAATGACTGGACCACTG GAG  | CCCGGGTCCGAGGAGAGGTTT TGG |
| Novel-mir-93-2  | TGATAGGGCCCGAGAAATGACTGGACCCTGGAGGAGCCGCCGGGGTCGGAGGAGAGGTTTTGGCACTGCGTAT                            | -19.5      | Novel-mir-93-5 p | Novel-mir-93-3 p | GCAGAAATGACTGGACCACTG GAG  | CCCGGGTCCGAGGAGAGGTTT TGG |
| Novel-mir-93-3  | TGATCGGGCCCGAGAAATGACTGGACCCTGGAGGAGCCGCCGGGGTCGGAGGAGAGGTTTTGGCACTGCGTAT                            | -19.9      | Novel-mir-93-5 p | Novel-mir-93-3 p | GCAGAAATGACTGGACCACTG GAG  | CCCGGGTCCGAGGAGAGGTTT TGG |
| Novel-mir-93-4  | TGATCGGGCCCGAGAAATGACTGGACCCTGGAGGAGTCGCCAGGGTCGGAGGAAAGGTTTTGGCACTGCGTATAGAGCAG                     | -21.9      | Novel-mir-93-5 p | -                | GCAGAAATGACTGGACCACTG GAG  | -                         |
| Novel-mir-93-5  | TGATCGGGCCCGAGAAATGACTGGACCCTGGAGGAGCCGCCGGGGTCGGAGGAGAGGTTTTGGCACTGCGTATAGAGCAG                     | -22        | Novel-mir-93-5 p | Novel-mir-93-3 p | GCAGAAATGACTGGACCACTG GAG  | CCCGGGTCCGAGGAGAGGTTT TGG |
| Novel-mir-93-6  | TGATCGGGCCCGAGAAATGACTGGACCCTGGAGGAGCCGCCGGGGTCAGAGGAGAGGTTTTGGCACTGCGTATAGAGCAG                     | -23.1      | Novel-mir-93-5 p | -                | GCAGAAATGACTGGACCACTG GAG  | -                         |
| Novel-mir-94    | CCTATTTATCGCATACCAGGGATCATGGACCCTGTCGTATGTCAAAATCTTGAAGAGGTCATGTTGCCTTATGCTGAAGAGGA                  | -24.7      | Novel-mir-94-5 p | -                | GCATACCAGGGATCATGGAC       | -                         |
| Novel-mir-95    | CTCAGTCAGAGCATTGAAGATGGTCTGTGCTTCCAAACATGACAACAACCCGAAGCACACAGCCAGAATAATCAAGGAGTGGCTCTGTAAGAA        | -31.5      | Novel-mir-95-5 p | -                | GCATTGAAGATGGTCTGTGGC TGT  | -                         |
| Novel-mir-96    | CATAAACTCGCATTTAGTAGGCGAGTTCCTGATGATTTAGTGCATCTGCCTCTAAATGCCCTGTAGTTTTTTT                            | -20.9      | Novel-mir-96-5 p | -                | GCATTTAGTAGGCGAGTTCCTG A   | -                         |
| Novel-mir-97    | GAGCCAGAAAGCCTAGTGGATCAAACACTGTAGTACTGAGGATTCCTGCCGTGTTGCTGGTTTTCTTCCAGGGTGA                         | -18.8      | Novel-mir-97-5 p | -                | GCCTAGTGGATCAAACACTGTA GC  | -                         |
| Novel-mir-98    | ACTGGGTCATGCCTTTACTGTGGTCTCCTGACCATCTCATAGCCGCTGCCTGTTGTCGGCCAAAAGAGCGGGCCCGCCAGTGAA GGTGGGGACACTGAC | -39.2      | Novel-mir-98-5 p | -                | GCCTTTACTGTGGTCTCCTGA CC   | -                         |
| Novel-mir-99    | AAATTAGCCAGCTATCGGAATTGCAGAAAGCGTGATGAAGAAGGGGTACCTAAGAAGACAAGATGGCCCACTGTATTTGGCCTGCTGCCTGCTCG      | -23.9      | Novel-mir-99-5 p | -                | GCTATCGGAATTGCAGAAAGG CGT  | -                         |
| Novel-mir-100   | GTGGTCAAGGCTGAGTGTCTATCCTTTCTGGGCTACCATCACACCACCTGGTGCCAACTTCAGAGCAGAGAGCATCACTAATG TCTAGCGATGCA     | -30.6      | Novel-mir-100-5p | -                | GCTGAGTGTCTATCCTTTCTG      | -                         |
| Novel-mir-101   | CCCCTTGGAAGCTGGTTTCAGATGGTGGCATAGAGTATCGTACCTGTCTAGCACCATTTGAAATCAGTGTCTTGGGGC                       | -37.8      | Novel-mir-101-5p | -                | GCTGGTTTCAGATGGTGGCATA GA  | -                         |
| Novel-mir-102   | ACAAGACGAAGGAGATGATAGTGGACATGAGGACAAAGAGGAGATCTCATCGGCCACTGTTTCATCCGGGGGCTAGA                        | -20.9      | Novel-mir-102-5p | -                | GGAGATGATAGTGGACATGAG GAC  | -                         |
| Novel-mir-103-1 | GCGCCTGCTCGGCACCGCTGCTGACTGAACCCATCCACTGCCGCTGTTTAGCACGGCGTTTGAACAGGCAAGTGTG                         | -27.9      | Novel-mir-103-5p | Novel-mir-103-3p | GGCACCCTGCTGACTGAAC        | TCTGTTTAGCACGGCGTTTGAAC A |
| Novel-mir-103-2 | GCGCCTGCTCGGCACCGCTGCTGACTGAACCCATCCACTGCCGCTGTTTAGCACGGCGTTTGAACAGGCAATTGCG                         | -27.9      | Novel-mir-103-5p | Novel-mir-103-3p | GGCACCCTGCTGACTGAAC        | TCTGTTTAGCACGGCGTTTGAAC A |
| Novel-mir-104   | CCTCCCTGTTGGGCATCTTATTCTGCGCCAGAGCTCTCGAATGTCATCGGGTCTGGGTAGTGTGGTCCCGGGTGGG                         | -33.3      | Novel-mir-104-5p | -                | GGGCATCTTATTCTGCGCCAGA GG  | -                         |



|                 |                                                                                                |            |                  |                  |                             |                          |
|-----------------|------------------------------------------------------------------------------------------------|------------|------------------|------------------|-----------------------------|--------------------------|
| Novel-mir-105   | TGTTAGGGTCGACAGGTCATGTTGCTGCTGCTGCAGTGCCTGAGCCAGTTGAGCGTTTGACAGTGAAC                           | -22        | Novel-mir-105-5p | Novel-mir-105-3p | GGGTCGACAGGTCATGTTGCT       | TGCCTGAGCCAGTTGAGCGTTTG  |
| Novel-mir-106   | GTGAGAAGGGGGTCGACAGACGCTCAAGGGGGACAGAGTCCAGCTGTTGAGAAGTAGCTAGTGGCTGAGCTGATA                    | -18.5      | Novel-mir-106-5p | Novel-mir-61-3p  | GGGTCGACAGACGCTCAAGGGGGAC   | GCTGTTGAGAAGTAGCTAGTGGC  |
| Novel-mir-107   | TTATTCATTAGGCTTTATTCTGATTGGCTGGGATGAAGGGGAGCCAGCAATCAGAGCAGGTCTCATGAATAAT                      | -37.9      | Novel-mir-107-5p | -                | GGTCTTATTCTGATTGGCTGG       | -                        |
| Novel-mir-108   | ACTGGTGCCAGAGATCTCGGGCTGGTGTGCGGGTCCCCGATGAGACAGCGCTGGCAGCCGGCGGTGCGAG                         | -27.3      | Novel-mir-108-5p | Novel-mir-108-3p | GGTGCCAGAGATCTCGGGCTG       | CGATGAGACAGCGCTGGCAGCCGG |
| Novel-mir-108   | CTGGTGCCAGAGATCTCGGGCTGGTGTGCGGGTCCCCGATGAGACAGCGCTGGCAGCCGGCGGTGCGAA                          | -26.8      | Novel-mir-108-5p | Novel-mir-108-3p | GGTGCCAGAGATCTCGGGCTG       | CGATGAGACAGCGCTGGCAGCCGG |
| Novel-mir-109   | GAGGTCTCAAAGCGGGGTAGAAGGTGTTAGAGTCAATCCGGTAGGCTGTCTGTGGGGCTGATGATGCTGGTGGTGGCTCT               | -22        | Novel-mir-109-5p | Novel-mir-51-3p  | GGGTAGAAGGTGTTGAGGTCATC     | TGTCTGTGGGGCTGATGATGCTG  |
| Novel-mir-110   | CGTTCATCAAGTACTGACTACTTTTTCGGGTGGCGTCACTACTGACTAAGGCATTGAGCGCCCGCTGGCAAGACTGAGCACACC           | -24.2      | Novel-mir-110-5p | -                | GACTGACTACTTTTTCGGGCTG      | -                        |
| Novel-mir-111-1 | CAGTGATGCAGTACTTAAGGTGAGCGTTGGTGTCTCATCGCCAGATGATCTTTGACGCTCTGCTATCATCA                        | -24.2      | Novel-mir-111-5p | -                | GACTTAAGGTGAGCGTTGGT        | -                        |
| Novel-mir-111-2 | TTTTGATGCAGTACTTAAGGTGAGCGTTGGTGTCTCATCGCCAGATGATCTTTGACGCTCTGCTATCATCA                        | -23.2      | Novel-mir-111-5p | -                | GACTTAAGGTGAGCGTTGGT        | -                        |
| Novel-mir-112   | TTGACAGGCAGTAGTAAGTTCCTGTGGAGCACGCACAGTGTAAAAGCCCTTCTCTGGTTGCAC                                | -21.4      | Novel-mir-112-5p | -                | GTAGTAAGTTCCTGTGGAGCAC      | -                        |
| Novel-mir-113   | GGCGACAGGTCGTAGTCGTTCACTCAGTCCACTGATGGAGGATTTTTGGGGACTGGAATGATGGTGGAGCATTTCAA                  | -22.4      | Novel-mir-113-5p | Novel-mir-113-3p | GTAGTCGTTCACTCAGTCCACTGATG  | TTTGGGGACTGGAATGATGGTGG  |
| Novel-mir-114   | AGCAGACCACTGCAGTGATACCCACAGCTATGACAGTCTCTGTGTTATAGAAACTGGCAATCATGCCACCATGTA                    | -18.2      | Novel-mir-114-5p | Novel-mir-114-3p | GTGATACCCACAGTATGACAGT      | TGTTATAGAAACTGGCAATCATGC |
| Novel-mir-115   | CGACAATGGTGAGCATGACAGTGTGCCCTGGGAGGGAGGAAGCCGGTGACAAGTCTAGGGCAATATGAGACCAGGGTC                 | -26.1<br>2 | Novel-mir-115-5p | Novel-mir-115-3p | GTGTTGCCCTGGGAGGGAGGA       | TGACAAGTCTAGGGCAATATGA   |
| Novel-mir-116   | CTGCTCTGTTGTTTTTTAGGTTTTGATTTTTGTAGCATTGGATGAGAAAATCAAAGCCTAAAGAAAATACAGCGCTG                  | -29.8      | Novel-mir-116-5p | -                | GTTTTTTTAGGTTTTGATTTTT      | -                        |
| Novel-mir-117   | CCAGGTTGCTAAAACATCTGCAGAGCAGTGGCTATGTTTCACTGGTGTGGGATTGAGGAAATATGCAACTCCAGGCAGCGTGTTGTTAGTTCAA | -28.6      | Novel-mir-117-5p | Novel-mir-117-3p | TAAAACATCTGCAGAGCAGTGGCTA   | TGCAACTCCAGGCAGCGTGTG    |
| Novel-mir-118   | ATAAACTAGCTAAAGGTTAATACATACTGACATATAAATGCATACAGTAGTGGTGTGAACTCATATGTTGTTGAATGATTTTTGCTA        | -18.3      | Novel-mir-118-5p | -                | TAAAGGTTAATACATACTGACATA    | -                        |
| Novel-mir-119   | TGTTGAGCGATAACTCAGTAAAGCTAGGTCGGGGTCATCTTTTTCAGGATCCACTTTGCTGCTTTATGGCTCGTTC                   | -22.5      | Novel-mir-119-5p | -                | TAACTCAGTAAAGCTAGGTCGGGG    | -                        |
| Novel-mir-120   | TGCTTTTACATAACTGTTGAACTTTTCTGGCCAGTTGACGTCAGTGGCTGTGCTAAAGTGTCTATATTTATGTTTTTCTATGAGAGCC       | -20.7      | Novel-mir-120-5p | -                | TAACTGTTGAACTTTTCTGGCC      | -                        |
| Novel-mir-121   | CGCACATACATAAGACGGAGCAGTGTGGCAGGAGGAAAGTTAATGTGTGTGTGTGTATTGTAGTGCCTATGATAGTGTGT               | -21.7      | Novel-mir-121-5p | -                | TAAGACGGAGCAGTGTGGGCACTGA   | -                        |
| Novel-mir-122-1 | CCCCTGGCCAATAAGAGAGGGTAAACCTGAACCGATCAAATAACAAGGCCACTTCGCTGTCTCGGGTTGAGTCTTTTGGTGGACTGGAGGT    | -26.2      | Novel-mir-122-5p | -                | TAAGAGAGGGTAAACCTGAACCGA    | -                        |
| Novel-mir-122-2 | CCCTGGCCGATAAGAGAGGGTAAACCTGAACCGATCAAATAACAAGGCCACTTCGCTGTCTCGGGTTGAGTCTTTTGGTGGACTGGAGGT     | -27.2      | Novel-mir-122-5p | -                | TAAGAGAGGGTAAACCTGAACCGA    | -                        |
| Novel-mir-123   | CTGGCCAGATAAGATAGTTGAGCTTTGGCGACACCACTACTGTGATCTATTAATTTGTGTCCTAGTAAACTTTCTCTATAGGTATAGGGTTGA  | -22.4      | Novel-mir-123-5p | -                | TAAAGATAGTTGAGCTTTGGCGCACTA | -                        |
| Novel-mir-123   | CTGGCCTGGATAAGATAGTTGAGCTTTGGCGACACCGCTACTGTGATCTATTAATTTGTGTCCTAGTAAACTTTCTCTATAGGTAGGG       | -24.6      | Novel-mir-123-5p | -                | TAAAGATAGTTGAGCTTTGGCGCACTA | -                        |
| Novel-mir-124   | GGGATCTGGGTAAGCAAGAACAGGGGCCCGACCACTGCTTCTTAAAGTGTGGAGGGCAGCGCTGCAGGCCCTGCTCCCA                | -35.8      | Novel-mir-124-5p | -                | TAAGCAAGAACAGGGGCCCGCAC     | -                        |
| Novel-mir-125   | CACCTCAGTTTAAAGTCTCACACCAGTGCAAAACAAAAATCGTGACGCTGCTCAGGTGTGGACCTAACTGTGGGGGA                  | -26.7      | Novel-mir-125-5p | Novel-mir-125-3p | TAAGTCTCACACCAGTGCAA        | CTGCTCAGGTGTGGACCTAA     |
| Novel-mir-126   | CACCTCAGTTTAAAGTCTCACACCAGTGCAAAACAAAAATCGTGACGCTGCTCAGGTGTGGACCTAACTGTGGGG                    | -26.7      | Novel-mir-126-5p | -                | TAAGTCTCACACCAGTGCAAAA      | -                        |
| Novel-mir-127-1 | TGACACCATGTAATATACTGCACACAGAGACGGCGGTGTTTCTGCTGTGATGTCTTTATTTTACGCCGTTTCTGGTGGTTCTTA           | -24.4<br>9 | Novel-mir-127-5p | -                | TAATATACTGCACACAGAGACGG     | -                        |
| Novel-mir-127-2 | TGACACCATGTAATATACTGCACACAGAGACGGCGGTGTTTCTGCTGTGATGTCTTTATTTTACGCCGTTTCTGGTGGTTCTTA           | -24.3<br>7 | Novel-mir-127-5p | -                | TAATATACTGCACACAGAGACGG     | -                        |

|                 |                                                                                           |            |                  |                  |                            |                        |
|-----------------|-------------------------------------------------------------------------------------------|------------|------------------|------------------|----------------------------|------------------------|
| Novel-mir-127-3 | TGACACCATGTAATATACTGCACACAGAGACGGCGGTGTTTCTCTGTCTGATGTCTTTATTTTCGCGCCGTTTCTTGGTGGTTCTTA   | -24.3<br>7 | Novel-mir-127-5p | -                | TAATATACTGCACACAGAGACGG    | -                      |
| Novel-mir-127-4 | TTGGTGGCTGTAATATACTGCACACAGAGACGGCGGTGTTTCTCTGTCTGATGTCTTTATTTTCGCGCCGTTTCTTGGTGGTTCTTA   | -26.5<br>7 | Novel-mir-127-5p | -                | TAATATACTGCACACAGAGACGG    | -                      |
| Novel-mir-127-5 | TTTGATCTGTAATATACTGCACACAGAGACGGCGGTGTTTCTCTGTCTGATGTCTTTATTTTCGCGCCGTTTCTTGGTGGTTCTTA    | -24.1<br>7 | Novel-mir-127-5p | -                | TAATATACTGCACACAGAGACGG    | -                      |
| Novel-mir-136   | GAGACTACGGTAATCAATACATGGACGGAGGCCAAGCAAACCTGACAATAATCTACAGGCACCTGGCGTTTATGTGAGCTTGCCCT    | -25.1      | Novel-mir-136-3p | -                | TAATCAATACATGGACGGAGGC     | -                      |
| Novel-mir-128-1 | AGGATTGGGGTAATGTGAGCATGTCGACGGGTGTCAGTGAGCAGCCGGGACGGCATTGACACCAGCTGCAAC                  | -23.8      | Novel-mir-128-5p | Novel-mir-128-3p | TAATGTGAGCATGTCGACGGG      | GCAGCCGGGACGGCATTG CAC |
| Novel-mir-128-2 | AGGATTGGGGTAATGTGAGCATGTCGACGGGTGTCAGTGAGCAGCCGGGACGGCATTGACACCAGCTGCAAC                  | -23.8      | Novel-mir-128-5p | Novel-mir-128-3p | TAATGTGAGCATGTCGACGGG      | GCAGCCGGGACGGCATTG CAC |
| Novel-mir-129   | GTCATGAATTTACACAGTCTAGTCAAGGAATGGATTTTTTAACTCTCTGTCTGAGTTTCTGATTCAACTTAAAGCTGTGGGCT       | -22.3      | Novel-mir-129-5p | -                | TACACAGTCTAGTCAAGGAATGG    | -                      |
| Novel-mir-130   | AAAGCTCAAATACAGATGAGTGGAAAGTGAAGGTGCTGCTTCTTATCCCTCCACTATTCTAGTTTAAAGGGCACA               | -23.4      | Novel-mir-130-5p | -                | TACAGATGAGTGGAAAGTGAAGGGT  | -                      |
| Novel-mir-131   | CCTCTGTCCATACCTTTACTACCCTGACCTGAGGTGACACTTTTTTCCACCCTGGAGTATACACAGGTAGTAGGTAACAAGTTGT     | -28.7<br>1 | Novel-mir-131-5p | -                | TACCTTTACTACCCTGACCTGAGG   | -                      |
| Novel-mir-132-1 | CCTCTGTCCATACCTTTACTACCCTGACCTGTGGTGACACCTTTTTTACCACCCTGGAGTATACACAGGAAGCAGGTGGACAAGTTGT  | -37.9      | Novel-mir-132-5p | -                | TACCTTTACTACCCTGACCTGTGG   | -                      |
| Novel-mir-132-2 | CCTCTGTCCATACCTTTACTACCCTGACCTGTGGTGACACCTTTTTTACCACCCTGGAGTATACACAGGAAGCAGGTGGACAAGTTGT  | -39        | Novel-mir-132-5p | -                | TACCTTTACTACCCTGACCTGTGG   | -                      |
| Novel-mir-132-3 | CCTCTGTCCATACCTTTACTACCCTGACCTGTGGTGACACCTTTTTTACCACCCTGGAGTATACACAGGAATCAGGTGGACAAGTTGT  | -33.5      | Novel-mir-132-5p | -                | TACCTTTACTACCCTGACCTGTGG   | -                      |
| Novel-mir-132-4 | CCTCTGTCCATACCTTTACTACCCTGACCTGTGGTGGCACCCTTTTTTACCACCCTGGAGTATACACAGGAAGTAGGTGGACAAGTTGT | -38        | Novel-mir-132-5p | -                | TACCTTTACTACCCTGACCTGTGG   | -                      |
| Novel-mir-132-5 | CCTCTGTCCATACCTTTACTACCCTGACCTGTGGTGACACCTTTTTTACCACCCTGGAGTATACACAGGAATCAGGTGGACAAGTTGT  | -37.6      | Novel-mir-132-5p | -                | TACCTTTACTACCCTGACCTGTGG   | -                      |
| Novel-mir-133   | GTGCCGTGAATACGAAACACATGCTGAACCAGGAGCTGGTGGTTTCTAGAGCAGTGGGAGTTGTGGAAGGGCAAGA              | -23.4      | Novel-mir-133-5p | Novel-mir-133-3p | TACGAAACACATGCTGAACCAGGAGC | TTCTAGAGCAGTGGGAGTTGTG |
| Novel-mir-134   | CTGGACTCTCTACTACTCTGGAGTTGCCACGGTGACGACGGTTTGTCTATATATGGCAACTTAAATAGTGCAACAATTA           | -21.3      | Novel-mir-134-5p | -                | TACTACTCTGGAGTTGCCACGGT    | -                      |
| Novel-mir-135   | TGAACGAACCTACTCGTGAACCTGGAGTCTCTCTTGTGGGAGAGGGTGACCCATGAAAGGGACTATTTTC                    | -23.1      | Novel-mir-135-5p | -                | TACTCGTGAACCTGGAGTCTCT     | -                      |
| Novel-mir-136   | ATGTGGGTGATACTGCATCAGGAACCTGATTGGCTGATGCTCAGTAGCCAACAGTACCTGATGCATTACCATCAGCATC           | -37.5      | Novel-mir-136-5p | -                | TACTGCATCAGGAACCTGATTGG    | -                      |
| Novel-mir-137   | AAGGCGCGGCTACTGGGCATGCAGGATAGTTGTCATCAGGAAGGCCACATAGTCCCTGTACCATTAAGTACTGTCATATCTGCTC     | -25.7      | Novel-mir-137-5p | Novel-mir-137-3p | TACTGGGCATGCAGGATAGTTG     | TAAGTACTGTCATATCTGCTC  |
| Novel-mir-138-1 | ACATTCAATATACTGTATAAATCAAGCTGCACTAACTTAAATGAACATCTCTGGTTAAGTCTGAGCAGTGATACATTAAGTTGGGTT   | -19.4      | Novel-mir-138-5p | -                | TACTGTATAAATCAAGCTGCAC     | -                      |
| Novel-mir-138-2 | ACATTCAATATACTGTATAAATCAAGCTGCACTAACTTGAATAACATCTCAGGTTAAGTTGAGCAGTAATACATTAAGTTGGTTTA    | -24.4      | Novel-mir-138-5p | -                | TACTGTATAAATCAAGCTGCAC     | -                      |
| Novel-mir-152   | TGGGCTCCTATACTGTGGAATGCTGCCATGGGAGATTAGATCTGCTCCGAACCAAGCTGTTTTAGATCACTGCTCAA             | -21.9<br>2 | Novel-mir-152-3p | -                | TACTGTGGAATGCTGCCATGG      | -                      |
| Novel-mir-139   | TACGGGGAGTTACTGTGTGAGAGGAAGCGGTGATTTCTGTTTAAAGCTGTAAGCGTGACATTACCTTTCCCTTGAAGGCCAG        | -25.6      | Novel-mir-139-5p | -                | TACTGTGTGAGAGGAAGCGGTTGA   | -                      |
| Novel-mir-140   | TCTGCTCCTGACTTGGTCAAAGCTCCTCAGTGTGGATAGATGCCTGAGAGGTTCTGAACAAGTATAGGATCTCTG               | -30.5      | Novel-mir-140-5p | Novel-mir-140-3p | TACTTGGTCAAAGCTCCTCAG      | TGAGAGTTCTGAACAAGTAT   |
| Novel-mir-141   | CCTTAGCCTCTACTTTAGTAGGCAAACCTCTTCAAGTAAGGCCACATAGTGGTCTCCTGCTGTAGAATATCTC                 | -21.1      | Novel-mir-141-5p | -                | TACTTTAGGTAGGCAAACCTCT     | -                      |
| Novel-mir-142   | TCTCCCAATCTACTTTCTTAGGATATCTGCCCTAACCATTTTTTTTTCAGCTGCCTGGGCTTGGTTTGCAGAGATGTTGAGGAGG     | -26        | Novel-mir-142-5p | -                | TACTTTCTTAGGATATCTGCCCT    | -                      |
| Novel-mir-143-1 | TCTGTGGGCTAGACTATGGAATGCCCTGCCGTTGTACTACGGTGGAAAGCGATCTAGTGGCCTTAAATCGGCCCTAAAGAC         | -24.1      | Novel-mir-143-5p | -                | TAGACTATGGAATGCCCTGCCG     | -                      |
| Novel-mir-143-2 | TTTGTGGCCCTAGACTATGGAATGCCCTGCCGTTGAACTACGGTGGAAAGCGATCTAGTGGCCTTAAATCGGCCCTAAAG          | -21.8      | Novel-mir-143-5p | -                | TAGACTATGGAATGCCCTGCCG     | -                      |

|                 |                                                                                        |       |                  |                  |                           |                         |
|-----------------|----------------------------------------------------------------------------------------|-------|------------------|------------------|---------------------------|-------------------------|
| Novel-mir-144   | TGCAATGAAATAGATAAAGCCTAAATTGGTCGGAGCACCAGTCAGTCAGGTCAGGTCCTTTGTTACCAGTCTGGGTCAGTCAGCC  | -19.3 | Novel-mir-144-5p | -                | TAGATAAAGCCTAAATTGGTCGGA  | -                       |
| Novel-mir-145   | GCAGCCCCTGTAGATGAGCCTGAGGATTTGCATGAGCTGGTGCAAGCTGGAGCTCAATCTAGATGTTGAAGGTGCTGA         | -26.2 | Novel-mir-145-5p | -                | TAGATGAGCCTGAGGATTTGCTGAT | -                       |
| Novel-mir-146   | GTCTGATAGATAGCAAGATCTGGACAATTGGAGGAAGTTGAGAAAATACAGCTATTATGATCCAGTGTGGTTATTTTATCAGGT   | -21.6 | Novel-mir-146-5p | -                | TAGCAAGATCTGGACAATTGGAGG  | -                       |
| Novel-mir-147   | TGTCAGGCTGTAGCAGCACATCATTACTGGTATTCCCTCTCTGCAATGCTGGTATGATATGTGCTGCTCTATCAGACAC        | -28.2 | Novel-mir-147-5p | -                | TAGCAGCACATCATTACTGGTATG  | -                       |
| Novel-mir-148   | GCACCTCCAGTAGCTGTGGATCTGACCTGCACAACATTGAGGAGGAATTTCTTTCTTTAGTTTCAGCTCATACTTAGGATGTCTG  | -19.6 | Novel-mir-148-5p | -                | TAGCTGTGGATCTGACCTGCTG    | -                       |
| Novel-mir-149   | AGAGATTCATAGGACTTTACTCTCTATGCTGGGAATGCTGAATCAAGAAAAGAAACGTCAGTGGAGCCAACATGTAGGATATTAGT | -21.9 | Novel-mir-149-5p | -                | TAGGACTTTACTCTCTATGCTG    | -                       |
| Novel-mir-150-1 | AGTGATCTGTTAGGATGATAAAGGCTCTACGGGGTCTTTAAGATACGATGGAGCCTTGTCATTAAGGGCTTTGTATG          | -29.3 | Novel-mir-150-5p | -                | TAGGATGATAAAGGCTCTACGGG   | -                       |
| Novel-mir-150-2 | AGTGCTCTGTTAGGATGATAAAGGCTCTACGGGGTCTTTAAGATACGATGGAGCCTTGTCATTAAGGGCTTT               | -33.2 | Novel-mir-150-5p | -                | TAGGATGATAAAGGCTCTACGGG   | -                       |
| Novel-mir-151   | AGTGCTCTGTTAGGATGATGAGGAGTATGAAGTCTTTAAGATACAATGGAGCCTTGTCATTTAGGGCTTT                 | -23.3 | Novel-mir-151-5p | -                | TAGGATGATGAGGAGTATGAAGT   | -                       |
| Novel-mir-152   | CATGGTTCAATAGGATGTTTGGTAAATGGAAGGGGGTATTGCTCTGTACTCATTACAGTGGCAATATGATAACTGCTTGATTAC   | -21.8 | Novel-mir-152-5p | Novel-mir-152-3p | TAGGATGTTGGTAAATGGAAGGG   | TGATAACTGCTTGATTACATGTG |
| Novel-mir-153-1 | AATGATACACTAGGCAATTGTTGGGCAACTCTGATTAGCAACAGTGCCTGAGAAATGCCTGGTATTGCT                  | -26.1 | Novel-mir-153-5p | -                | TAGGCAATTGTTGGGCAACTCTG   | -                       |
| Novel-mir-153-2 | AATGATACACTAGGCAATTGTTGGGCAACTCTGATTAGCAACAGTGCCTGAGAAATGCCTGGTATTGCTGCTTT             | -26.1 | Novel-mir-153-5p | Novel-mir-153-3p | TAGGCAATTGTTGGGCAACTCTG   | TGCCGTGAGAAATGCCTGGTA   |
| Novel-mir-154   | GCAGGGGGGCTAGGCGTGTCACTGCGTGTACAGTCACTGCTTGCGCACGGGGCCACGCCCTGCCTACCTGTC               | -36.5 | Novel-mir-154-5p | -                | TAGGCGTGTCACTGCGTGTCA     | -                       |
| Novel-mir-155   | GCAGGGGGGCTAGGCGTGTCACTGCGTGTACAGTCACTGCTTGCGCACGGGGCCACGCCCTGCCTACCTGTC               | -36.5 | Novel-mir-155-5p | Novel-mir-155-3p | TAGGCGTGTCACTGCGTGTCA     | TGCGCACGGGGCCACGCCCTGC  |
| Novel-mir-156   | AGCTGTTTTTAGTACTATAGTTGTTAAACCTGAGGTTTATGAAGTCTCTAGTCTTTGAAGTTGGTGTAGTGTAGGAGTT        | -19.8 | Novel-mir-156-5p | Novel-mir-156-3p | TAGGTACTATAGTTGTTAAACCTG  | TAGTCTTTGAAGTTGGTGTAGT  |
| Novel-mir-157   | AAGGGCCTCTAGGTTGGCTTGTCTGGCCCTGATCTACAGTAGTAACAGACAAATATTAGGATGGCTTAG                  | -18.2 | Novel-mir-157-5p | Novel-mir-157-3p | TAGGTTGGCTTGTCTGGCCCTG    | GTAGTAACAGACAAATATTAGG  |
| Novel-mir-158   | GACCCCAATAGGTTGTAACATGGCACATTAAGTGGCCATCTGAACAAGTGGCAAGTGAATACCTGCTTGTGTGAGGGA         | -20   | Novel-mir-158-5p | -                | TAGGTTGTAACATGGCACATT     | -                       |
| Novel-mir-159   | TGGAAAAAGGTAGTACGTTCCGCTTCAGCACCAGGTGCAAGCTTGAATTTTACTGCCACACCCTGATGCTTGTGTTGTACCATG   | -23.3 | Novel-mir-159-5p | -                | TAGTACGTTCCGCTTCAGCACC    | -                       |
| Novel-mir-160-1 | TACTCTGCGGTAGTAGATGCTCTGCAGAGAGGGCAGTGGAGTCTGGTATCTTCTCAGTCTTTACCACTCTCTGCAGGTGCGTGT   | -39.6 | Novel-mir-160-5p | -                | TAGTAGATGCTCTGCAGAGAGG    | -                       |
| Novel-mir-160-2 | TACCCTGCGGTAGTAGATGCTCTGCAGAGAGGGCAGTGGCCTCTGGTATCTTCTCCGAGTCTTTACCACTCTCTGCAGGTGCT    | -37.4 | Novel-mir-160-5p | -                | TAGTAGATGCTCTGCAGAGAGG    | -                       |
| Novel-mir-161   | CGGGTTGAGGTAGTGGTTGTATGGTTGAAATTACACCCTGGGAGTTAACTGTACAACCTTCTAGCTTTCTCTGGTA           | -27.2 | Novel-mir-161-5p | Novel-mir-161-3p | TAGTAGGTTGTATGGTTGAA      | GTTAACTGTACAACCTTCTAGC  |
| Novel-mir-162   | GTTGCCGGGTAGTTAAGGAACCTCCGTTGGCAAGGCTCAGGGTGTGAATGAGGCCTGCCCGAGTTTCAAGTCTCTGGATGT      | -33.3 | Novel-mir-162-5p | -                | TAGTTAAGGAACCTCCGTTGG     | -                       |
| Novel-mir-163   | AGATGCCCTGTAGTTACTCTGTACTTGTGGGGGAGCATGGAGATGCTAATGGCATGGCCATAGTATGTGCCAGGTGCAAC       | -25.5 | Novel-mir-163-5p | -                | TAGTTACTCTGTACTTGTGGG     | -                       |
| Novel-mir-164-1 | TCTTTGACAGTAGTTACATTTCTATGCCTCTGCACAGGAAACAGCTGTGGCTGGAGAAAATAATTCTACATGGTGTCAACCT     | -21.9 | Novel-mir-164-5p | -                | TAGTTTACATTTCTATGCCTCT    | -                       |
| Novel-mir-164-2 | TCTTTGACAGTAGTTACATTTCTATGCCTCTGCACAGGTGACAGCCTGGCTGGAAAAATAATTCTACATGGTGTCAACCT       | -21.2 | Novel-mir-164-5p | -                | TAGTTTACATTTCTATGCCTCT    | -                       |
| Novel-mir-165   | TGCAAGATGTTAGTTTTATGATCAGTGGTATATTACGCGCTCAGCGGAGACAACAGACTGAGAAAAGTGACTTTTTGTGTC      | -25.6 | Novel-mir-165-5p | -                | TAGTTTTATGATCAGTGGT       | -                       |
| Novel-mir-166   | ACATAGCCTATATAGAAAGACAAAGGGCACTGGCTATAGGCTACAATGCCAAGCAATGGTGCACATGATTACACTGAGTTGTGTA  | -21.1 | Novel-mir-166-5p | -                | TATAGAAAGACAAAGGGCACTG    | -                       |
| Novel-mir-167-1 | CAATTGTTGGTATAGAGTAAAACAGCAGAGGGGAGAGCAAAACATCCCTGGGTGGCACCTGTGCTGATTGTCTGTGTGGATGT    | -26.4 | Novel-mir-167-5p | -                | TATAGAGTAAAACAGCAGAGG     | -                       |

|                 |                                                                                            |       |                  |                  |                            |                           |
|-----------------|--------------------------------------------------------------------------------------------|-------|------------------|------------------|----------------------------|---------------------------|
| Novel-mir-167-2 | CAGTTGTTGGTATAGAGTGAAAACAGCAGAGGGGAGAGCAGACATCTCTCGGGGGCGCCTGTGCCTACTGT                    | -22.2 | Novel-mir-167-5p | -                | TATAGAGTGAAAACAGCAGAGGG    | -                         |
| Novel-mir-168-1 | ACGTTATACTTATAGGTTAAGGATTTTATTGTGCTCATTGCCCGAGTTATTGTCAATTGAGTTAGTAAAGGTTCTAAGCTCCTGAGAGA  | -20.2 | Novel-mir-168-5p | -                | TATAGGTTAAGGATTTTATTGTG    | -                         |
| Novel-mir-168-2 | GCGTTATACTTATAGGTTAAGGATTTTATTGTGCTCATTGCTCGAGTTATTGTCAATTGAGTTAGTAAAGTCTAAGCTCCTGAGAGA    | -21.9 | Novel-mir-168-5p | -                | TATAGGTTAAGGATTTTATTGTG    | -                         |
| Novel-mir-169   | GCGTCCOCAGATCAATGAAGTGTGCACCAGCCCTGCTCTGGTGCAGTCTTCTGTTTTGCTGCGAAAATGTC                    | -28.7 | Novel-mir-169-5p | -                | TATCAATGAAGTGTGCACCAGC     | -                         |
| Novel-mir-170-1 | TCATGCAAGTTATCCAGAGCCTGCGTGAAGCCCTCGTGTGCACCAGCAGTCCAGGTAACACGACGCGGGTTCTGGGAAT            | -33.8 | Novel-mir-170-5p | Novel-mir-170-3p | TATCCAGAGCCTGCGTGAAGC      | TAAACTACGACGCGGGTTCTGGGAA |
| Novel-mir-170-2 | TCGTGACAGTTATCCAGAGCCTGCGTGAAGCCCTCGCGTGCACCAGCAAGTCTCCAGGTAACACGACGCGGGTTCTGGGAA          | -31.3 | Novel-mir-170-5p | Novel-mir-170-3p | TATCCAGAGCCTGCGTGAAGC      | TAAACTACGACGCGGGTTCTGGGAA |
| Novel-mir-171   | GCATGGAAGTATGATTGTCTCTGTTGAGTCTAATGTTCAACATCTCGAAACCCAAAGCTCAGGCTCGGAAGAGTACATCGAAAC       | -19.2 | Novel-mir-171-5p | -                | TATGATTGTCTCTGTTGAGTCT     | -                         |
| Novel-mir-172   | GGTTCAGCCCTATGCAGAACAGCAGCAGGGGACAAATACTGCACCTGATGTTGACTTGTGAATTGGCTTGCAGTTGGCCTCTAGG      | -30.3 | Novel-mir-172-5p | -                | TATGCAGAACAGCAGCAGGGGAC    | -                         |
| Novel-mir-173   | GGTTCAGCCCTATGCAGAACAGCAGCAGGGGACAGAGTATCTCCATGGTAGATACCGCACTTGTGTTGACTTGTGAATTGGCTTG      | -31.4 | Novel-mir-173-5p | Novel-mir-173-3p | TATGCAGAACAGCAGCAGGGGACAGA | TTGATGTTGACTTGTGAATTGGC   |
| Novel-mir-174   | GGCATCACTGTATGGAGGAGGTGGAGCAGTGGCAGTATTTGTTTTAAATTCTGACAAAACAGCTTTGGGCATAAGTGGTCTTGT       | -20.1 | Novel-mir-174-5p | -                | TATGGAGGAGGTGGAGCAGTGC     | -                         |
| Novel-mir-175   | GTGTAGCGCATATGTAGTGTGAGAAGAGTCAAGCCAAAACGCACAGTGTCTGTGACGCTAGCATTCCACCCACAGTACATAATGC      | -28.7 | Novel-mir-175-5p | -                | TATGTAGTGTGAGAAGAGTCA      | -                         |
| Novel-mir-176   | AAGGAAGCTCTATGTCAACACTGTCCAGCAGCGCAGTCAACTGTTCTGGGCTCGGACGCATCTGGGATGGACCATCACA            | -22.6 | Novel-mir-176-5p | -                | TATGTCAACACTGTCCAGCAGCGC   | -                         |
| Novel-mir-177-1 | AAGGAAGCCCTATGTCAACAGTGTCCAGAAGCGCAGTGCATTGTTCTGGGCTCAGAGGCATCTGGGATGGACCAT                | -21.9 | Novel-mir-177-5p | -                | TATGTCAACAGTGTCCAGAAGCGC   | -                         |
| Novel-mir-177-2 | AGGGAAGCCCTATGTCAACAGTGTCCAGAAGCGCAGTCAACTGCTCTGTGCTCTGAGGCATCTGGGATGAACCTT                | -26.7 | Novel-mir-177-5p | -                | TATGTCAACAGTGTCCAGAAGCGC   | -                         |
| Novel-mir-177-3 | TTCAGAGCCCTATGTCAACAGTGTCCAGAAGCGCAGTGTGACTGCTCTGGGCTGAAGGCATGTGGGATGGAC                   | -31.4 | Novel-mir-177-5p | -                | TATGTCAACAGTGTCCAGAAGCGC   | -                         |
| Novel-mir-178   | GGCGGGGATCTATGTGTGCTTGGACGTGACGGATGAGGAAGTGTCCCGGGTTTTATTGGGGATCCCGGCTT                    | -25   | Novel-mir-178-5p | -                | TATGTGTGCTTGGACGTGACGGAT   | -                         |
| Novel-mir-179   | TGGCCCTGGATATGTTGTTAGCTGAGAGAGGAGTATGAAAATGTTGGGCACATTTGTTGACTTTACATACCTAACATACCTT         | -25.4 | Novel-mir-179-5p | -                | TATGTTGTTAGCTGAGAGAGGAGG   | -                         |
| Novel-mir-189-1 | ATAATCTCCTTATTGATGTCATTGTCTTATACCATAAAAAAGCGAAGGAAGTTTCGATGATCTTTGTGCACTAAGAAACAGTGGAAACAT | -19.6 | Novel-mir-189-3p | -                | TATTGATGTCATTGTCTTATAC     | -                         |
| Novel-mir-189-2 | ATAATCTCCTTATTGATGTCATTGTCTTATACCATAAAAAAGCGAAGGAAGTTTCGATGATCTTTGTGCACTAAGAAACAGTGGAAACAT | -19.6 | Novel-mir-189-3p | -                | TATTGATGTCATTGTCTTATAC     | -                         |
| Novel-mir-180   | AGGGGGTGTATTGTCTGGGAGAGGGCGTCTGTTTTCTGGTTTCGGGACCCCGCCGATAGAGAGGGTAAACCAGAACC              | -25   | Novel-mir-180-5p | -                | TATTGTCTGGGAGAGGGCGTCT     | -                         |
| Novel-mir-181   | AGGGTCTGACTATTGTGGAACTTTGCGACAGAACAAACAGACATCTCCAGTATGAAGGCTCCAGGTCAGAGAGGTCCA             | -18.4 | Novel-mir-181-5p | -                | TATTGTGGAACTTTGCGACAGAA    | -                         |
| Novel-mir-182   | CTGAGTCAGCTATTAGGAGTCTGATGGCAGAGGAAAGAAAGATTTTTAGTCTAGAAAGTCTGCATTTACACTTCTGAGCCTC         | -29.3 | Novel-mir-182-5p | Novel-mir-182-3p | TATTTAGGAGTCTGATGGCAGAA    | CATTTACACTTCTGAGCCTCTGA   |
| Novel-mir-183   | TAGGATGAGATATTTGGGAACTGGGACAAACAGGATGCTTCCATAGGGCTGGGACTCTCTCCAG                           | -18.8 | Novel-mir-183-5p | -                | TATTTGGGAACTGGGACAAACA     | -                         |
| Novel-mir-184-1 | TTGAATGGGTTCAAAATGCAGCAGAGGAGGTGTGAGTAACTTCTGTGTTGATGTGCTGGACCTCGTCT                       | -34.3 | Novel-mir-184-5p | Novel-mir-184-3p | TCAAAATGCAGCAGAGGAGGTTGTC  | TTCTGTGTTGATGTGCTGG       |
| Novel-mir-184-2 | TTGAATGGGTTCAAAATGCAGCAGAGGAGGTGTGAGTAACTTCTGTGTTGATGTGCTGGACCTCGTCT                       | -34.3 | Novel-mir-184-5p | Novel-mir-184-3p | TCAAAATGCAGCAGAGGAGGTTGTC  | TTCTGTGTTGATGTGCTGG       |
| Novel-mir-185   | TCTGCCTCCCTCAAAGCCTCAAAGGATGACGGTGTGGCAGCCGTACGTGCTGCTGATGCTCTCTGTTGCAAGGCCCGCAGAT         | -29   | Novel-mir-185-5p | Novel-mir-185-3p | TCAAAGCCTCAAAGGATGACGGTG   | GTCGTAGTCTCTGGTGAAGG      |
| Novel-mir-186   | TCTGCCTCCCTCAAAGCCTCAAAGGATGACGGTGTGGCAGCCGTACGTGCTGCTGATGCTCTCTGTTGCAAGGCCCGCAGAT         | -29   | Novel-mir-186-5p | Novel-mir-186-3p | TCAAAGCCTCAAAGGATGACGGTG   | TCGTAGTCTCTGGTGAAGG       |
| Novel-mir-187-1 | GGTATGGTCTCAACTGTCCGCTGCAGACTGGCTAATACCTCTCTGACCATGTCCAGGGCCCGAGGTAAGATGAGCTCTCTG          | -22.4 | Novel-mir-187-5p | -                | TCAACTGTCCGCTGCAGACTG      | -                         |

|                 |                                                                                                    |        |                  |                  |                          |                        |
|-----------------|----------------------------------------------------------------------------------------------------|--------|------------------|------------------|--------------------------|------------------------|
| Novel-mir-187-2 | GGTATGGTCTCAACTTGTCCGCTGCAGACTGGCTAATACTTCTCTGACTATGTCCAGGGCCGACAGGTAAGATGAGCTCCTCTGCT             | -22.47 | Novel-mir-187-5p | -                | TCAACTTGCCGCTGCAGACTG    | -                      |
| Novel-mir-188   | ATTTATACAGTCAAGTTGGTACTGTGGCAGTTCAAGACTGTTATCAGTCTGTCTACCAGACAGAGCCGGTCAGTCACAAACTTTTCTGCATACTC    | -29.8  | Novel-mir-188-5p | -                | TCAAGTTGGTACTGTGGCAGT    | -                      |
| Novel-mir-189   | GGAGGGGATTC AATGTCTCTCCCGGCTCTGACACCATCGCGGCTTAGCTGGATGGAGTGCCCGGGGTTGTGTCTGGCCTTTCCCTCCC          | -44    | Novel-mir-189-5p | -                | TCAATGTCTCTCCCGGCTCTG    | -                      |
| Novel-mir-190   | GGGAGGGGTTCAATGTCTCTCCCGGCTCTGAACTGACATGGGCTTAGCCGGATGTAGCGCCCGCCGGGGATATGTTGTTGGCTTTTCCCTCCCT     | -43.4  | Novel-mir-190-5p | -                | TCAATGTCTCTCCCGGCTCTGA   | -                      |
| Novel-mir-191-1 | GACAGCCACCTCACAGTGCAGTGCAGCGGACAGTACCTGGAAGCCCTGGTCCAAATAGTACTTGCCCACTGTATTTGTGAATACACAGCCGTC      | -31.7  | Novel-mir-191-5p | -                | TCACAGTGCAGTGCAGCGGCA    | -                      |
| Novel-mir-191-2 | GACAGCCACCTCACAGTGCAGTGCAGCGGACAGTACCTGGAAGCCCTGGTCCAGTTCAGTGTAGCTTCTCAATTGCCTGTGGTTAAGCGCAT       | -30.6  | Novel-mir-191-5p | -                | TCACAGTGCAGTGCAGCGGCA    | -                      |
| Novel-mir-192-1 | AGATGTTCCATCACTATGCACCTCAGGACGCCCAATCATTGCGCGTGATTGGAGTCTCAGCGTCTCCGGAGTGAAAGTTTCACC               | -24    | Novel-mir-192-5p | -                | TCACTATGCACCTCAGGACGCC   | -                      |
| Novel-mir-192-2 | AGATGTTCCATCACTATGCACCTCAGGACGCCCAATCATTGCGCGTGATTGGAGTCTCAGCGTCTCCGGAGTGAAAGTTTCACC               | -24    | Novel-mir-192-5p | -                | TCACTATGCACCTCAGGACGCC   | -                      |
| Novel-mir-192-3 | AGATGTTCCATCACTATGCACCTCAGGACGCCCAATCATTGCGCGTGATTGGAGTCTCAGCGTCTCCGGAGTGAAAGTTCAGTCTTCTCC         | -20.6  | Novel-mir-192-5p | -                | TCACTATGCACCTCAGGACGCC   | -                      |
| Novel-mir-192-4 | AGATGTTCCATCACTATGCACCTCAGGACGCCCAATCATTGCGCGTGATTGGAGTCTCAGCGTCTCCAGAGTGAAAGTTTCACC               | -19.3  | Novel-mir-192-5p | -                | TCACTATGCACCTCAGGACGCC   | -                      |
| Novel-mir-193   | GGCTCTGTTTTCAGAATCATCTTTTCTCTTGCCATTGTTAGGGGCTAGCTTTGACTTGAATAGGGTTG                               | -18.4  | Novel-mir-193-5p | -                | TCAGAATCATCTTTTCTCTTGG   | -                      |
| Novel-mir-194-1 | TCCAGCTCTGTGACTAGAGGACTGGGAGCTGAGAACCAGGACAGAGCTTCACAGCTCCTCTGACAGGTTACAACCGCTGAGTCTGGAG           | -38.46 | Novel-mir-194-5p | -                | TCAGACTAGAGGACTGGGAGCTGA | -                      |
| Novel-mir-194-2 | TCCAGCTCTGTGACTAGAGGACTGGGAGCTGAAAAGTGGAGACAGAGCTTCACAGCTTCTCTTTGACAGGTTACAATCACTCAGGCTGGAG        | -35.13 | Novel-mir-194-5p | -                | TCAGACTAGAGGACTGGGAGCTGA | -                      |
| Novel-mir-195   | ACAACAGCACTCAGAGAGGCTGTTAGAGAGGCTCGAAGCACAAAGGGAGCTCAGTCAATATAAGCTTTTACACAGGTTGGGAGGCATCCGA        | -18.1  | Novel-mir-195-5p | -                | TCAGAGAGGCTGTTAGAGAG     | -                      |
| Novel-mir-196   | CTCCTGGAAGTCAAGTGGTAACTGGACAGAGCCCTCAGCCACAGTGTGAAAAGATTCTCTGTTCTCTTTTGGCTCGGATTTATAGGAT           | -27.5  | Novel-mir-196-5p | -                | TCAGATGGTAACTGGACAGAGC   | -                      |
| Novel-mir-197-1 | TGGCTATGGATCAGATGTTAGCAGCGCAAGGAGGTTGTTGAAAATCATTGGCCAGAGTGTGCACTTATATCCAGATAATTTCAGTCT            | -20.2  | Novel-mir-197-5p | -                | TCAGATGTTAGCAGCGCAAGGAG  | -                      |
| Novel-mir-197-2 | TGGCTATGGATCAGATGTTAGCAGCGCAAGGAGGTTGTTGAAAATCATTGGCTCAAAGTGTGCACTTATATCCAGATAATTTCAGTCT           | -18.92 | Novel-mir-197-5p | -                | TCAGATGTTAGCAGCGCAAGGAG  | -                      |
| Novel-mir-198   | ACGGGGACCCTCAGCGTTGAAATCTCGGTACCTCCTGCGAAAAGCACAAACGTGATGTTCAAGCCAGAAATGCACAGCGACTGTGGCGGTACCCT    | -24.3  | Novel-mir-198-5p | -                | TCAGCGTTGAAATCTCGGTACC   | -                      |
| Novel-mir-199   | CATGTAACCTCAGGAGTTGTTCTTTGCTTGAATGCTTAAATGACAGGAATAGGACTGCTGAGATTTACTGTAA                          | -20.1  | Novel-mir-199-5p | Novel-mir-100-3p | TCAGGAGTTGTTGTTCTTTGC    | GACAGGAATAGGACTGCTGAGA |
| Novel-mir-200-1 | CATTCCGTGCTCAGGATGTCAGATGCGCGCGCTCAAAAAACATTCCGTGCTCAGGATGCCATTGCTCGCTCAGGAAAT                     | -20.76 | Novel-mir-200-5p | -                | TCAGGATGTCAGATGCGCGCG    | -                      |
| Novel-mir-200-2 | TATTCCGTGCTCAGGATGTCAGATGCGCGCGCTCAAAAAACATTCCGTGCTCAGGATGCCATTGCTCGCTCAGGAAAT                     | -22.29 | Novel-mir-200-5p | -                | TCAGGATGTCAGATGCGCGCG    | -                      |
| Novel-mir-201   | TTACACCCAGTCACTGTGTGAACGAGAAAGAGGGACCCAGGTAGCCGACTTCAGTGCATGCAGTGATTTATTATACAGTGATGAAG             | -23.5  | Novel-mir-201-5p | -                | TCAGTGTGTGAACGAGAAAGA    | -                      |
| Novel-mir-202-1 | GTTAAAGCCATCAGTTGAGTTGGTCCCGCAGATGGCTGCCTCGGTTCTGTACCGGAAACAAATTTCTCTGTGTGAACATACTTGGCCAGTAAAGGTGA | -23.2  | Novel-mir-202-5p | -                | TCAGTTGAGTTGGTCCCGCAGA   | -                      |
| Novel-mir-202-2 | GTTAGACCCATCAGTTGAGTTGGTCCCGCAGATGGCTGCCTCGGTTCTGTACCGGCAACAAATTCCTGTGTGTAACA                      | -23    | Novel-mir-202-5p | -                | TCAGTTGAGTTGGTCCCGCAGA   | -                      |
| Novel-mir-203   | CTGGCTCTCCTCAGTTTGGGGAAGAAGTAGAGGTGTGTTGAGCTTCTTCTACTGCTTCTATTCTACTGCTGACTCCAA                     | -23    | Novel-mir-203-5p | -                | TCAGTTTGGGGAAGAAGTAGAG   | -                      |
| Novel-mir-204-1 | CTGGCTCTCCTCAGTTTGGGGAAGAAGTAGAGGTGTGTTGAGCTTCTTCTACTGCTTCTATTCTACTGCTGACTCCAA                     | -21.7  | Novel-mir-204-5p | Novel-mir-204-3p | TCAGTTTGGGGAAGAAGTAGAGGC | TGAGCTTCTTGGCCAGTGATGG |
| Novel-mir-204-2 | CTGGCTCTCCTCAGTTTGGGGAAGAAGTAGAGGTGTGTTGAGCTTCTTCTACTGCTTCTATTCTACTGCTGACTCCAA                     | -29.5  | Novel-mir-204-5p | -                | TCAGTTTGGGGAAGAAGTAGAGGC | -                      |
| Novel-mir-205-1 | GTGAGCTGGGTCAAGTTGGAATGGAGGATGTCGGGATTATGGCGTTGAACACCAAGCTGAAGTCCACA                               | -23    | Novel-mir-205-5p | -                | TCAGTTGGAATGGAGGATGTC    | -                      |

|                 |                                                                                          |        |                  |                  |                          |                           |
|-----------------|------------------------------------------------------------------------------------------|--------|------------------|------------------|--------------------------|---------------------------|
| Novel-mir-205-2 | GTGAGCTGGGTGAGTTTGAATGGAGGATGTCTGGTATGATGGTGTGAATGCCAAGCTGAAGTCCACA                      | -20.7  | Novel-mir-205-5p | Novel-mir-205-3p | TCAGTTTGGAAATGGAGGATGTC  | TGGTGTGAATGCCAAGCTGAAG    |
| Novel-mir-206-1 | GTGAGCTGGGTGAGTTTGGAGTAGAGGATGTCCAGGATGATGGTGTGAACGCTGAGCTGAAGTCCACA                     | -19.2  | Novel-mir-206-5p | -                | TCAGTTTGGAGTAGAGGATGTC   | -                         |
| Novel-mir-206-2 | GTGAGCTGGGTGAGTTTGGAGTAGAGGATGTCCAAGATGCTGGTGTGAATGCTGAGCTGAAGTCCACA                     | -18    | Novel-mir-206-5p | -                | TCAGTTTGGAGTAGAGGATGTC   | -                         |
| Novel-mir-207   | GTGAGCAGGGTCAGTTTGGAGTGGAGGATGAGTGGGATGATGGGCCATGCATAGTCCCTGGGGAGTTGAGGTGTTGCAGGATG      | -20.2  | Novel-mir-207-5p | Novel-mir-207-3p | TCAGTTTGGAGTGGAGGATGA    | TAGTCCCTGGGGAGTTGAGGTTG   |
| Novel-mir-208   | GTGAGCTGGGTGAGTTTGGAGTGGAGGATGTCCAGGATGATGGTGTGAATGCCAAGCTGAGGTCCACAAGAGG                | -22.8  | Novel-mir-208-5p | Novel-mir-208-3p | TCAGTTTGGAGTGGAGGATGTC   | ATGGTGTGAATGCCAAGCTGAGTGC |
| Novel-mir-209   | GTGAGCCGGGTGAGTTTGGAGTGGAGGATGTCTGGGATGATGGTGTGAATGCCAAGATGAAATCCACAAGAAGGCCCTGCA        | -24.5  | Novel-mir-209-5p | -                | TCAGTTTGGAGTGGAGGGTGTCTG | -                         |
| Novel-mir-210   | GCCTATAGCATCATAACTAAGGAAGGCTCAGGGTCACTGTAGTAGCCCTAATAAGCTTTAGCA                          | -19.4  | Novel-mir-210-5p | -                | TCATAACTAAGGAAGGCTCAGG   | -                         |
| Novel-mir-211-1 | AGAATCCGACTCATAAGGTGGTCCGGTCCGGTGTGGAGCAAAGGGTGTGCTGTGCATATAGCTGTACAGCATTCTGCACCGCA      | -35.7  | Novel-mir-211-5p | -                | TCATAAGTGGTCCGGTCCGGCTGT | -                         |
| Novel-mir-211-2 | AGAATCCATTTCATAAGGTGGTCCGGTCCGGTGTGGAGCAAAGGGTGTGCTGTGCATATAGCTGTGCAGCATTCTGCACAGACA     | -28.5  | Novel-mir-211-5p | -                | TCATAAGTGGTCCGGTCCGGCTGT | -                         |
| Novel-mir-211-3 | AGAATCTGACTCATAAGGTGGTCCGGTCCGGTGTGGAGCAAAGGGTGTGCTGTGCATATAGCTGTGCAGCATTCTG             | -23.2  | Novel-mir-211-5p | -                | TCATAAGTGGTCCGGTCCGGCTGT | -                         |
| Novel-mir-211   | AGAATCTGACTCATAAGGTGGTCCGGTCCGGTGTGGAGCAAAGGGTGTGCTGTGCATATAGCTGTGCAGCATTCTGCACAGACA     | -31.5  | Novel-mir-211-5p | -                | TCATAAGTGGTCCGGTCCGGCTGT | -                         |
| Novel-mir-212-1 | TTCAAAAACGTCATAGCTTGCAGCACTCTTTGAGAGCTTCAAAGTAAGGAAGCAGGTTGAGGCATGTGGTAT                 | -18.7  | Novel-mir-212-5p | Novel-mir-212-3p | TCATAGCTTGCAGCACTCTTTG   | AAAGTAAGGAAGCAGGTTGAGGC   |
| Novel-mir-212-2 | TTCAAAAACGTCATAGCTTGCAGCACTCTTTGAGAGCTTCAAAGTAAGGAAGCAGGTTGAGGCATGTGGTAT                 | -18.7  | Novel-mir-212-5p | Novel-mir-212-3p | TCATAGCTTGCAGCACTCTTTG   | CAAAGTAAGGAAGCAGGTTGAGGC  |
| Novel-mir-213-1 | ACAAACAGAGTCATATCAGGATCTGGGATAGGCTCAGCTGCCAGGCTATTCTGATTTTTATATCTCTCCGCTTTTTTC           | -20    | Novel-mir-213-5p | Novel-mir-213-3p | TCATATCAGGATCTGGGATAGG   | TCTATTCTGATTTTTATATCTCTCT |
| Novel-mir-213-2 | ACAAACAGAGTCATATCAGGATCTGGGATAGGCTCAGCTGCCAGGCTATTCTGATTTTTATATCTCTCTGCTTTT              | -21.2  | Novel-mir-213-5p | Novel-mir-213-3p | TCATATCAGGATCTGGGATAGG   | CTATTCTGATTTTTATATCTCT    |
| Novel-mir-214   | ATCAGGACCATCATCAAGAAGGCACAGGAGAGGATTTACTTCCAGTGCCAGCTCAGGAAGTTGACCTGCC                   | -18.7  | Novel-mir-214-5p | -                | TCATCAAGAAGGCACAGGAGA    | -                         |
| Novel-mir-215-1 | TCTATGTAATCATGTTATCAAATGAACCTCCTGGGTGATGCTTCTGTTTTGCTCTATGCCAAGGGTGGTCTTTATTAGTTGATCTAA  | -19.8  | Novel-mir-215-5p | -                | TCATGTTATCAAATGAACCTCCT  | -                         |
| Novel-mir-215-2 | TCTATGTAATCATGTTATCAAATGAACCTCCTGGTGTGATGCTTCTGTTTTGCTCTATGCCAAGGGTGGTCTTTATTAGTTGATCTAG | -20.6  | Novel-mir-215-5p | -                | TCATGTTATCAAATGAACCTCCT  | -                         |
| Novel-mir-216   | ACATGAGCTTTTCATTGAGAATATGAGCAGAGTTCTTTGCAACTTGTGTTTTAGCAATGAAAAATGTTAAGATTTATGAGAATGGA   | -22.2  | Novel-mir-216-5p | Novel-mir-216-3p | TCATTTGAGAATATGAGCAGAG   | TGTGTTAAGATTTATGAGAATGGA  |
| Novel-mir-217   | CTGAGCTGATCCAAAAGCAGTCTGTTGTACAAAAAGGCCACGGTGTGTGTTATAGTTGTACTTTTTGAGTCTCTGCCA           | -19.1  | Novel-mir-217-5p | Novel-mir-217-3p | TCCAAAAGGCAGTCTGTTGTAC   | TTATAGTTGTACTTTTTGAG      |
| Novel-mir-218-1 | GGCCGGGATTCCAATATCTGGTAGACTGGGAGGTTATGGTCCAGAAGAGCAGTCTGGATTCCCCGCTCCT                   | -27.9  | Novel-mir-218-5p | -                | TCCAATATCTGGTAGACTGGGA   | -                         |
| Novel-mir-218-2 | GGCTGGGAATCCAATATCTGGTAGACTGGGAGGTTATAGTCCAGAGGAGCGGCCCTGGATTCCCTGCTC                    | -24.2  | Novel-mir-218-5p | -                | TCCAATATCTGGTAGACTGGGA   | -                         |
| Novel-mir-219   | GCTGCCCACTCCACTGTAACAAGTTTGGCAGGGCACTGCTTCTCCCTCCTGAGGCGCCGTGCCATAAAGTTCTCTCAGTGTGCA     | -28.24 | Novel-mir-219-5p | -                | TCCACTGTAACAGTTTGGCAGGG  | -                         |
| Novel-mir-220   | GCCAGGCACTCCAGTCAGAGGAGTGCAGTTGGCTCAGCCAGTATGCAAAAATTTGCTTAAGGAGTGAATCC                  | -20.8  | Novel-mir-220-5p | -                | TCCAGTCAGAGGAGTGCAGTTGGC | -                         |
| Novel-mir-221   | NNNGCCTAGGTCCATCGGTTCTCTGGAGTGTGGCGTTGCTGGTGTGGTGGCCCCAAACGGAGAGGAACCCGGGCTCGACT         | -41.3  | Novel-mir-221-5p | -                | TCCATCGGTTCTCTGGAGTGTGG  | -                         |
| Novel-mir-222   | CTTGGTGTATCCATGTAGAGGAGTGGCTAATGGTTGCTCCATTTCTAGTCACTATTGTAAGTCTGTTGGTGTGATCTGGCT        | -24    | Novel-mir-222-5p | -                | TCCATGTAGAGGAGTGGCTAAATG | -                         |
| Novel-mir-223   | CTTGTATCATCCATGTAGAGGAGTGGCTGATAGTTGTTCCATTCCATAAATGGTATCCGTAACCACTCTTGGTGTGATCAGT       | -21    | Novel-mir-223-5p | -                | TCCATGTAGAGGAGTGGCTGATA  | -                         |
| Novel-mir-224   | GCCCTCTAAATCCATTGTAGGCCAGGGCACATACTGTAGCTGTGCTCTTTGGCCAGCAGTGAATGATGTGGCC                | -34    | Novel-mir-224-5p | -                | TCCATTGTAGGCCAGGGCACATAC | -                         |

|                 |                                                                                       |        |                  |                  |                          |                          |
|-----------------|---------------------------------------------------------------------------------------|--------|------------------|------------------|--------------------------|--------------------------|
| Novel-mir-225   | AACCACAGTATCCATTGTACAGCAGAAGCAATAGCAGGTATTAAGCCTGTGATTTTCATCATTGTTGGAACAGGGTGTTTGGTTC | -24.4  | Novel-mir-225-5p | -                | TCATTGTACAGCAGAAGCAATAGC | -                        |
| Novel-mir-226   | ACGACCTGTTCCGAGAGGTCTGGTTCTGAAGGGTGGTCAGAGCCCCCTACCACCTCCTCTGCAGGCCAGC                | -31    | Novel-mir-226-5p | Novel-mir-226-3p | TCCGAGAGGTCTGGTTCTGAAGGG | CTTACCACCTCCTCTCTGCAG    |
| Novel-mir-227-1 | CACCAAGGCATCCGCGACTGTCTGCCTCCTGGTCTGGTATGGCGTATGCCTCCGGCCACTTTGATAAATAGTCCATGGCGGCCA  | -29.9  | Novel-mir-227-5p | Novel-mir-227-3p | TCCGCGACTGTCTGCCTCCTG    | TTGATAAATAGTCCATGGCGGCCA |
| Novel-mir-227-2 | CACCAAGGCATCCGCGACTGTCTGCCTCCTGGTCTGGTATGGCGTATGCCTCCGGCCACTTTGATAAATAGTCCATGGCGGCCA  | -28.3  | Novel-mir-227-5p | Novel-mir-227-3p | TCCGCGACTGTCTGCCTCCTG    | TTGATAAATAGTCCATGGCGGCCA |
| Novel-mir-227-3 | CACCAAGGCATCCGCGACTGTCTGCCTCCTGGTCTGGTATGGCGTATGCCTCCGGCCACTTTGATAAATAGTCCATGGCGGCCA  | -28.3  | Novel-mir-227-5p | Novel-mir-227-3p | TCCGCGACTGTCTGCCTCCTG    | TTGATAAATAGTCCATGGCGGCCA |
| Novel-mir-228   | CACGACCCGGTCCGGATAAGTGAAGAAGATGGATGGATGTGAAGTCCCAGACTCTTTTCGAGTCCAGATAGTGGAAAGA       | -20.1  | Novel-mir-228-5p | -                | TCCGGATAAGTGAAGAAGATGGA  | -                        |
| Novel-mir-229   | CTGAACCTCTTCTGAAGTACTGGTCTTCTGAGGGTCACTGAACCTCTGACCTCTGTCCACATGTCCACACACTCAGGAGGGATC  | -27.5  | Novel-mir-229-5p | Novel-mir-229-3p | TCCGAAAGTACTGGTCTTCTG    | TCTGTACCATGTCCACACTCA    |
| Novel-mir-230   | CTCATGGGACTCCTGAGACAGCTGACGGTACTAGCAGGCCAAGCGGGTGCAGCCAGGCAGTTGCGGAGG                 | -28.2  | Novel-mir-230-5p | -                | TCCTGAGACAGCTGACGGGTA    | -                        |
| Novel-mir-231-1 | ATTTCCAGCTCCTGGTTTAGCCGTTAGCTTGGCCGTTGGTTGGGGGTGATAGCTGGAAGAGAGACAGGGACGTGCTCCGAGG    | -23.1  | Novel-mir-231-5p | Novel-mir-231-3p | TCCTGGTTTAGCCGTTAGCTT    | TGATAGCTGGAAGAGACAGGGACG |
| Novel-mir-231-2 | ATTTCCAGCTCCTGGTTTAGCCGTTAGCTTGGCCGTTGGTTGGGGGTGATAGCTGGAAGAGAGACAGGGACGTGCTCCGAGG    | -24.2  | Novel-mir-231-5p | Novel-mir-231-3p | TCCTGGTTTAGCCGTTAGCTT    | TGATAAGCGGAAGAGACAGGGACG |
| Novel-mir-232   | TGCACCTCCCTCTGATGGTGTCTTGTCCCCTCTTGTGGGAGGCATGCGTAAACAGGGTGTAGATCATGGGACTGAGGACAC     | -41.2  | Novel-mir-232-5p | -                | TCCTGTAGGCTGCTTTGTCCC    | -                        |
| Novel-mir-233   | TGTCTGAGCTTCTGTACCTGCCTCCTAGGGTGCAGTGGTTTTTGTGGCATGTCTTTTGAAGATTGGGTGTAGGCTGTTTGA     | -22.3  | Novel-mir-233-5p | Novel-mir-233-3p | TCCTGTACCTGCCTCCCTAGG    | TTTTTGAAGATTGGGTGTAGGC   |
| Novel-mir-234   | AGATAAACATGCTTTCAGTTCACACAAGCAGTGTCTCACAGTCCCTGTGGTCTGTAGTCTGTTCTGAAAGGTTAAATCCATTG   | -20.4  | Novel-mir-234-5p | Novel-mir-234-3p | TCCTTTCAGTTCACACAAGCAG   | TCTGTAGTCTGTTCTGAAAGGTTA |
| Novel-mir-235-1 | TTGACTGGGTTGCAAAATGCAACAGAGTAGGGCTCAGTTCGCGCCTCGTGTGTTGATGTGCTGGACCCCGCCCT            | -28.8  | Novel-mir-235-5p | -                | TGCAAAATGCAACAGAGTAGGC   | -                        |
| Novel-mir-235-2 | TTGATTGGGTTGCAAAATGCAACAGAGTAGGGCTCAGTTCGCGCCTCGTGTGTTGATGTGCTGGACCCCGCCCT            | -30.4  | Novel-mir-235-5p | -                | TGCAAAATGCAACAGAGTAGGC   | -                        |
| Novel-mir-236   | CCCTGGACTGTGCAAGCAACAGACGGTCTCTCGAACAGTGTCTTATGAGGTCTGCCTGACCTGGGCTGTCACTCAACTCA      | -26.9  | Novel-mir-236-5p | -                | TCGAAGCAACAGACGGTCTCT    | -                        |
| Novel-mir-237   | CAAGGACACCTCGACATGTTGACTGGACAAGCGGCAATCGATCCGCTAATCTCCGTTAGGAACAGCCGCTCTAC            | -18.2  | Novel-mir-237-5p | -                | TCGACATGTTGACTGGACAAGC   | -                        |
| Novel-mir-238   | CCTGGGCTGGTCGAGGTAGGGATGATGGTGGCTGAGGAGACAGGAGCATGTACAACAGTTAAAGGAGACTGTGATTGACCTGT   | -26    | Novel-mir-238-5p | Novel-mir-238-3p | TCGAGGTAGGGATGATGGTGG    | TTAAAGGAGACTGTGATTGA     |
| Novel-mir-239   | CCTGGACTGGTCGAGTTGGATGTTACTGAAGTGAACAGAAATAGTACATACGGTAAAGTAGTACTGTGATTGACCTCGAGGGTG  | -20.2  | Novel-mir-239-5p | Novel-mir-239-3p | TCGAGTTGGATGTTACTGAAGA   | TAAGTAGTACTGTGATTGACTG   |
| Novel-mir-240   | CTGGCTCCTCTCGATGTGGAGGAGCAGCGCTCTACTCTGAGCTCCTCCCGGTTGACTGAGCTCC                      | -24.6  | Novel-mir-240-5p | -                | TCGATGTGGAGGAGCAGCGGC    | -                        |
| Novel-mir-241   | GTGGGAAAAATCGATTGAAATGTGAACAGGGGTGATTACCATGGGCATTTGTTCAAGCTATGATTCTTGCA               | -19.6  | Novel-mir-241-5p | -                | TCGATTTGAAATGTGAACAGGG   | -                        |
| Novel-mir-242   | CTGCAGGAGATCGAAATGACGGTACCTTAAACGTACGTTTGAAGCAACAACCTGCGGATGTTCTGGAT                  | -18.7  | Novel-mir-242-5p | Novel-mir-242-3p | TCGCAAAATGACGGTGACCTTAA  | TGTATTCTTTGATGCTATTATT   |
| Novel-mir-243   | CTTTACAATGTCGGAACAGCTGTGAGCATAGCTCCGCTCAGCTCGTCTGAGTTTCCCTTCGGGCTCCTCTCACAGATCGTGTG   | -19.5  | Novel-mir-243-5p | -                | TCGGAACAGCTGTGAGCATA     | -                        |
| Novel-mir-244   | TGGTTCTCAGTCGGAAGGATGGCTTGTCCCTCAGGTTGGTGGAGAGTCTCTGCCTCGAGTGGAGGAGTT                 | -19.3  | Novel-mir-244-5p | -                | TCGGAAGGATGGCTTGTCC      | -                        |
| Novel-mir-245   | ACAGCATGAGTCGAGGAAAGGGAGGCTGTGGCTGTCTTCTGTCTCCGCTTCTTCTCTGTACATGTAGA                  | -24.5  | Novel-mir-245-5p | -                | TCGGAGGAAAGGGAGGCTGTG    | -                        |
| Novel-mir-246   | GTGTCAGACTTCGGATGGACACAGTCAAGTGGTGGAGATGAGAAGAGGACCGGGCTGTGGACACTGGGGCAGGCCA          | -29.16 | Novel-mir-246-5p | -                | TCGGATGGACACAGTCAAGTGG   | -                        |
| Novel-mir-247   | ATCCAAGGATCGTTGTCAGGCTGCAGTTGGTCAAAAATGGCGCGCTGGCTGCTCACTGACCCGTCGACATGCT             | -23.7  | Novel-mir-247-5p | -                | TCGTTGTCAGGCTGCAGTTGG    | -                        |
| Novel-mir-248   | TTGTCCAAAGTCGTTCCAGGAGTGCCTCAGGCGGTGCCAGTTCGGTGGAGGAAAGCGATTCTAAGCTGCTGAGTAAGA        | -24.6  | Novel-mir-248-5p | -                | TCGTTCCAGGAGTGCCTCAG     | -                        |

|                 |                                                                                                      |            |                  |                  |                              |                               |
|-----------------|------------------------------------------------------------------------------------------------------|------------|------------------|------------------|------------------------------|-------------------------------|
| Novel-mir-249   | ACTGTAAACATCTACACTGATTCTGCCTATGCAGTACAAGCAATGCATGTGGACCTGTGCTACTGGAGAAGAAAAGGTTTTGTGACC<br>TCTGCAGG  | -23.1      | Novel-mir-249-5p | -                | TCTACACTGATTCTGCCTATGCAG     | -                             |
| Novel-mir-250   | GTAACTAAGTCTACAGGAAGAGGGTGCAGAGCTATTCTGGCCAAACACTATAACCTCAGATTAGCATCA                                | -19.3      | Novel-mir-250-5p | -                | TCTACAGGAAGAGGGTGCAGGAC      | -                             |
| Novel-mir-251   | ATGCAAACTTCTAGAATGTTGCAATAAGCAGCATGTGTGCGTATGTTGGTATTTTCAGGCGTTTCTGAAAGTAGACATGCAG                   | -22.1      | Novel-mir-251-5p | -                | TCTAGAATGTTGCAATAAGCAGC      | -                             |
| Novel-mir-252   | CCTCATTCTCTAGGAGTAGACACCTTACTGGCCACAAGCGGAGGGTTGAGGGAGTATTCTTTGAGTCAAAGGGGT                          | -21.3      | Novel-mir-252-5p | -                | TCTAGGAGTAGACACCTTACTG       | -                             |
| Novel-mir-253   | CAGGTTGGACTCTAGTTGAAAACCGCAGTCTCAATGCTGTCCACAAGGCGTTGGCATGCCGTTGAAAATGTACCATCATGGGCT                 | -23        | Novel-mir-253-5p | Novel-mir-253-3p | TCTAGTTGAAAACCGCAGTCTCAA     | TGCGATGCCGGTTGAAAATGTCA<br>CC |
| Novel-mir-254   | GGGGTATACTCTATCTGTGGGCCATCCCTGGATCAGGTTCTGTGCTGCGCCTCCCATATGGTGTCCCTCAA                              | -18.4      | Novel-mir-254-5p | Novel-mir-254-3p | TCTATCTGGTGGCCATCCCT         | TCCTGTTGCTGCGCCTCCCATAT<br>G  |
| Novel-mir-255   | CAGCGCTCGTCTATGTTGCAAGGCCAGGAGCCGGACATGCTGTTGGAGCCGACTGGGGTGGAGCCCT                                  | -30.1      | Novel-mir-255-5p | -                | TCTATGTTGCAAGGCCAGGA         | -                             |
| Novel-mir-256   | GTGTCCCACTCTACTGTTGGCCCTCTTTTGGCCGACAGGACAGCCGGATGAGATGGTGTGGGCCCCACAGTAGAG<br>GCAAG                 | -37.2      | Novel-mir-256-5p | Novel-mir-256-3p | TCTCACTGTTGGCCCTCTTTG        | TGAGATGGTGTGGGCCCCACAG        |
| Novel-mir-257   | GTGTAGCCGGTCTCATCTCTACGCGCCATCAAGTAACATCTCTGCGTTGTCTTTAGTGATGAAGCGTAGACAGGGTTGCCAT<br>CCACA          | -23.8      | Novel-mir-257-5p | -                | TCTCATCTCTACGCGCCATCA        | -                             |
| Novel-mir-258   | TCTGAGAATATCTCCGAGGAGACTGAAGCTTTGTGCAAACTCTGCCTCTGTGCCCTTACTGGGATTTCCCTGG                            | -22.3      | Novel-mir-258-5p | -                | TCTCCGAGGAGGACTGAAGC<br>T    | -                             |
| Novel-mir-259-1 | CTTGGCCAACTGAACCTCCACCTCCACCCACCCCTGAAAAGGTATCGGTGTGGTTTGCAGCCAGTCCAAGC                              | -21.2      | Novel-mir-259-5p | Novel-mir-259-3p | TCTGAACCTCCACCTCCACCCAC      | GTATCGGTGTGGTTTGCAGCC<br>A    |
| Novel-mir-259-2 | CTTGGCCAACTGAACCTCCACCTCCACCCACCCCTGAAAAGGTATCGGTGTGGTTTGCAGCCAGTCCAAT                               | -18.9      | Novel-mir-259-5p | Novel-mir-259-3p | TCTGAACCTCCACCTCCACCCAC      | GTATCGGTGTGGTTTGCAGCC<br>A    |
| Novel-mir-260-1 | CATTGCCTGATCTGAATGCATGAGAGCAAGCAGCAGCATGTGGCGTACCTGACTGTTTATCTGGGGCTTCTGGTTGGGAAACC                  | -20.3      | Novel-mir-260-5p | -                | TCTGAATGCATGAGAGCAAGCA<br>CG | -                             |
| Novel-mir-260-2 | CATTGCCTGATCTGAATGCATGAGAGCAAGCAGCAGCATGTGGCATACCTGACTGTTTATCCAGGGCTTCTGGTTGGGAGCC                   | -21.6      | Novel-mir-260-5p | -                | TCTGAATGCATGAGAGCAAGCA<br>CG | -                             |
| Novel-mir-261   | CATCGCTGATCTGAATGCATGAGAGCAAGCAGCAGCATGTGGCATACCTGACTGTTTATCCAGAGCTTCTGGTTGGGAGCA                    | -20        | Novel-mir-261-5p | -                | TCTGAATGCATGAGAGCAAGCA<br>GC | -                             |
| Novel-mir-262   | AGCTCGGCCATCTGAGCGAGCTTGGCTGTGGATCACTTCAGCTTGCAGCACTCTGAAGCCCTGCA                                    | -22.2      | Novel-mir-262-5p | Novel-mir-262-3p | TCTGAGCGGAGCTTGGCTGTG        | TTCAGCTTGCAGCACTCTGAAG        |
| Novel-mir-263   | TTTCTTCCATCTGATAGTTTTCTGAATTGTCACTGTTTGTCTGCTGCACAAAGCCACAGTTCATTGAGCTGTGAGAGG<br>TCAGAGGC           | -32.2      | Novel-mir-263-5p | -                | TCTGATAGTTTTCTGAATTGTG       | -                             |
| Novel-mir-264   | GGAGGAATTGCTGGAGAAAGAGAAGTCTGGGCATCTTTGCTTAGACTGCTGCCCAAGCGCCGGTCCCG                                 | -25.5      | Novel-mir-264-5p | -                | TCTGGAGAAAGAGAAGTCTGG<br>GCA | -                             |
| Novel-mir-265-1 | GGAGGAAGTGTCTGGAGAGAGGGAAGTCTGGCATCCTTGTAGACTTCTGGCCCGCAACCCGATTCCC                                  | -23.6      | Novel-mir-265-5p | -                | TCTGGAGAGAGGGAAGTCTTG<br>GC  | -                             |
| Novel-mir-265-2 | GGAGGAAGTGTCTGGAGAGAGGGAAGTCTGGCAGCTTGTCTTAGACTGCTCCCCAGCGACCTGGTTCCG                                | -25.7      | Novel-mir-265-5p | -                | TCTGGAGAGAGGGAAGTCTTG<br>GC  | -                             |
| Novel-mir-265-3 | GATGAAGCTGTCTGAAGTCTGGTGGAGTGGCCCTGGAGACTCCGATACCTTCTCCCTGAAGGCAGGAGTCT                              | -20.6      | Novel-mir-265-3p | -                | TCTGAAGTCTGGTGGAGTG          | -                             |
| Novel-mir-266-1 | CAACCTCCCATCTGTAGGCTGACTCATCATCGTCTCGGATGAGACCAATGACCGCTGTGCATCTGCAAACTTTAGGAGTTGA                   | -24.5      | Novel-mir-266-5p | -                | TCTGTAGGCTGACTCATCATC        | -                             |
| Novel-mir-266-2 | CACCCTCCCATCTGTAGGCTGACTCATCATCATCTCGGATGAGACCAATGACCGTGTGCATCTGCAAACTTTAGGAGTCTGA                   | -20.5      | Novel-mir-266-5p | -                | TCTGTAGGCTGACTCATCATC        | -                             |
| Novel-mir-267   | TTGAGGTCTGTCTGGAACTGATGATGCTGGTGGTCTGTAGTCTGTGATGTGCTGCAGGCCATGTCACATCCGTCAGAGT<br>CAGCAGTAGA        | -32.1      | Novel-mir-267-5p | -                | TCTGTGAACTGATGATGCTGG<br>TG  | -                             |
| Novel-mir-268   | CGGCAGGCTGTCTGGAGCTTATGATGCTGGTGGTGGTCTGTAGTCTGTGATGTGCTGCAGGCCCTGCCA                                | -26.3      | Novel-mir-268-5p | -                | TCTGTGGAGCTTATGATGCTGG<br>TG | -                             |
| Novel-mir-269   | GTTTCAATATGCTGACTTTGTGTTTCATCATTGACCTCTCCAGTACCCCATCTATGATGTAGAGCTCTGTGTAGATCTGATTGAGAAA<br>TGTGGGTT | -18.9<br>9 | Novel-mir-269-5p | -                | TCTGTGATGATCTGATTGAGAA       | -                             |
| Novel-mir-270   | GTCTCATCTTCTGTGCTGAATTGAACAGCTGGGAAATTCGCCATCAAACATGCTGGGTTCCCTCTCATCATTGCTGGAGTCA<br>TCGTTGC        | -18.3      | Novel-mir-270-5p | Novel-mir-270-3p | TCTGTGCTGAATTGAACAGCT<br>GGG | CCCTCATCATTGCTGGAGTCA         |
| Novel-mir-271   | GTGATTAATCTGTAGGAGCGCAATGAGACGCGAGGCCACAAACCTTTGTCTCTGCTTTTGTGTTAATAACAGGATCATTAA<br>CTG             | -25.4      | Novel-mir-271-5p | -                | TCTGTTAGGAGCGCAATGAGAC<br>GG | -                             |



|                  |                                                                                                    |       |                  |                  |                           |                            |
|------------------|----------------------------------------------------------------------------------------------------|-------|------------------|------------------|---------------------------|----------------------------|
| Novel-mir-272-1  | TGGTGAGCCTTCTTAACCAGGCTGTGGGTGTTGGTAGTCCAGGACAGATCCTCTGAGATGTGGGTCCCAG                             | -20.2 | Novel-mir-272-5p | Novel-mir-272-3p | TCCTAACCCAGGCTGTGGGTGTTGG | AGGACAGATCCTCTGAGATG       |
| Novel-mir-272-2  | TGGTGAGCCTTCTTAACCAGGCTGTGGGTGTTGGTGGTCCAGGACACATGCTCTGAGATGTGGGTCCCAG                             | -22.7 | Novel-mir-272-5p | -                | TCCTAACCCAGGCTGTGGGTGTTGG | -                          |
| Novel-mir-272-3  | TGGTGAGCCTTCTTAACCAGGCTGTGGGTGTTGGTGGTCCAGGACAGATCCTCTGAGATGTGGGTCCCAGGAA                          | -20.2 | Novel-mir-272-5p | Novel-mir-272-3p | TCCTAACCCAGGCTGTGGGTGTTGG | CAGGACAGATCCTCTGAGATGTTGG  |
| Novel-mir-272-4  | TGGTGAGCCTTCTTAACCAGGCTGTGGGTGTTGGTGGTCCAGGACAGATCCTCTGAGATGTGGGTCCCAG                             | -20.2 | Novel-mir-272-5p | Novel-mir-272-3p | TCCTAACCCAGGCTGTGGGTGTTGG | AGGACAGATCCTCTGAGATG       |
| Novel-mir-273    | TGCCAAACTTTCTTCAACAGGGTCTCATTTGTGACATCTCCATCTCGGTCATAGAAGAGGGTGACGTGGGGAGGATCAGGAG                 | -19.3 | Novel-mir-273-5p | Novel-mir-273-3p | TCTTCAACAGGGTCTCATTTGTGA  | TCATAGAAGAGGGTGACGTGGGGA   |
| Novel-mir-274-1  | GCAAGCCTGTTCTTCAGGGTCAGACGGCGTGCCCTAATTCATGGGTTATCCGTAGTCTCTGGAAGGATGTGCGGT                        | -29.9 | Novel-mir-274-5p | Novel-mir-274-3p | TCTTCAGGGTCAGACGGGCGTGC   | TCATCCGTAGTCTCTGGAAGG      |
| Novel-mir-274-2  | GCGGGCCCGTCTTCAGGGTCAGACGGCGTGCCCTAATTCATGGGTTATCCGTAGTCTCTGGAAGGATGTGCGGT                         | -35.7 | Novel-mir-274-5p | Novel-mir-274-3p | TCTTCAGGGTCAGACGGGCGTGC   | TCATCCGTAGTCTCTGGAAGG      |
| Novel-mir-273    | GACAAACTGTTCTTGTAGATACAGGGTTTCTGGTGACCAGTTATATGTAGCTCTGCTTAAAAAGGACTGGCCCTGGACCGTCAAAGCAACAGATGGTC | -25.7 | Novel-mir-273-3p | -                | TCTTGATAGATACAGGGTTTCTGG  | -                          |
| Novel-mir-275    | CAATCCTGCATCTTGCTCTTGTGTAGCTGCCTGCTCAGTAAACCGAGCTGTGAGCTGCCAGGGCTGA                                | -22.1 | Novel-mir-275-5p | -                | TCTTGTCTTGTGTAGCTGCCTGC   | -                          |
| Novel-mir-276    | TGGGGCCTTGTCTTGTGAAATGTAACCTTTACCCAGCCTGAGATCCTAAGCAGCTCTGGAGAAGGTTTTTCATTGAGATGATCAAATGTTTT       | -24.1 | Novel-mir-276-5p | -                | TCTTGTGAAATGTAACCTTTTTC   | -                          |
| Novel-mir-277    | GGTGAACCGGCTTTGAGGGTTTGAAGGCCCTGCTCTGCTGCTGGACCATGCAAACCTAACCTTGGTAGAGCTGAGCTG                     | -22.2 | Novel-mir-277-5p | -                | TCTTTGAGGGTTTGAAGGCCCTGC  | -                          |
| Novel-mir-278    | GGGGTTTAGTCTTTGGCGGACTGGAGTAGGCCAAGTCTTATGATTGGTCCAGACTAGAAAAGTTGGGCAGCAC                          | -19.1 | Novel-mir-278-5p | Novel-mir-278-3p | TCTTTGGCGGACTGGAGGTAGGC   | TATGATTGGTCCAGACTAGAAAAGGT |
| Novel-mir-279    | TTCTGCTGCTGAAAAACATCCCCACGGCATGATGCTGCCACCACCATGCTTCACTGTAGGGATGGTATTGGCCAGGTGGTGA                 | -25.6 | Novel-mir-279-5p | Novel-mir-279-3p | TGAAAAACATCCCCACGGCATGA   | TGCTTCACTGTAGGGATGGTATTGGC |
| Novel-mir-280    | CGCCAAGAAATGAAACATCTTTCAGATATGGCCACGGGTGGTTATCTGAGTCTGCTGGAGACGTAGGTGTGAGTGCC                      | -28.2 | Novel-mir-280-5p | Novel-mir-280-3p | TGAAAAACATCTTTCAGATATGGC  | TCTGAGTCTGCTGGAGACGTAGG    |
| Novel-mir-281    | TTTCAAGAGCTGAACATTTCTGCAACATTTGTGATGTGGTTCGCAAGTAAATGCTGCAGAATTGTCTCTCTTGGAAAT                     | -27.6 | Novel-mir-281-5p | Novel-mir-281-3p | TGAACTATTCTGCAACATTTGTG   | TAAATGCTGCAGAATTGTGCTC     |
| Novel-mir-282-1  | GCCATCAAGCTGAAGAAGGAGCTCTATCGGGCCCGTTGGCTCATGGGACTCCTGAAGCAGCTGGCAGGTACCGAC                        | -32.6 | Novel-mir-282-5p | Novel-mir-282-3p | TGAAGAAGGAGCTCTATCGGGC    | CTCATGGGACTCCTGAAGCAGCTGGC |
| Novel-mir-282-2  | GCCATCAAGCTGAAGAAGGAGCTCTATCGGGCCTGGTTGGCTCATGGGACTCCTGAAGCAGCCGTGAGTA                             | -30.9 | Novel-mir-282-5p | -                | TGAAGAAGGAGCTCTATCGGGC    | -                          |
| Novel-mir-282-3  | GCCGTCAAGCTGAAGAAGGAGCTCTATCGGGCCTGGTTGGCTCATGGGACTCCTGAAGCAGCTTGCAGTA                             | -37.3 | Novel-mir-282-5p | -                | TGAAGAAGGAGCTCTATCGGGC    | -                          |
| Novel-mir-282-4  | GCCGTCAAGCTGAAGAAGGAGCTCTATCGGGCCTGGTTGGCTCATGGGACTCCTGAAGCAGCTGGCAGTA                             | -34.3 | Novel-mir-282-5p | Novel-mir-282-3p | TGAAGAAGGAGCTCTATCGGGC    | TTATGGGACTCCTGAAGCAGC      |
| Novel-mir-282-5  | GCTGTCAAGCTGAAGAAGGAGCTCTATCGGGCCTGGTTGGCTCATAGAACTACTGAAGCAGCTGGCAGG                              | -30.8 | Novel-mir-282-5p | -                | TGAAGAAGGAGCTCTATCGGGC    | -                          |
| Novel-mir-282-6  | GCTGTCAAGCTGAAGAAGGAGCTCTATCGGGCCTGGTTGGCTCATGGGACTGCTGAAGCAGCTGGCAGG                              | -32.8 | Novel-mir-282-5p | -                | TGAAGAAGGAGCTCTATCGGGC    | -                          |
| Novel-mir-282-7  | GCTGTCAAGCTGAAGAAGGAGCTCTATCGGGCCTGGTTGGCTCATGGGACTTCTGAAGCAACTGGCATGTA                            | -26.3 | Novel-mir-282-5p | -                | TGAAGAAGGAGCTCTATCGGGC    | -                          |
| Novel-mir-282-8  | GCTGTCAAGCTGAAGAAGGAGCTCTATCGGGCCTGGTTGGCTCATGGGACTTCTGAAGCAGCTAGCAGG                              | -29   | Novel-mir-282-5p | -                | TGAAGAAGGAGCTCTATCGGGC    | -                          |
| Novel-mir-282-9  | GTAGTCAAGCTGAAGAAGGAGCTCTATCGGGCCTGGTTGGCTCATGAGACTCCTGAAGCAGCTGGCAGG                              | -31.5 | Novel-mir-282-5p | -                | TGAAGAAGGAGCTCTATCGGGC    | -                          |
| Novel-mir-282-10 | GTTGTCAAGCTGAAGAAGGAGCTCTATCGGGCCTGGTTGGCTCATGGGACTCCTGAAGCAGCTGGCAGG                              | -35   | Novel-mir-282-5p | Novel-mir-282-3p | TGAAGAAGGAGCTCTATCGGGC    | TCATGGGACTCCTGAAGCAGC      |
| Novel-mir-283    | TCAGTCGTGGTGAAGAAGGAGCTGAGCTGTAAGACGAGTCTCTCGATTTACTGGTAGCTCTGTATTTACGGGTCGATCTA                   | -24.6 | Novel-mir-283-5p | -                | TGAAGAAGGAGCTGAGCTGTAAGA  | -                          |
| Novel-mir-284    | TCTGTCTGGTGAAGAAGGAGCTGGACTGTAAGGTGAAGCTGTCAATTTACTGGTCGATCTACGTTCTACTCTCACCTATGGTCATGAG           | -29   | Novel-mir-284-5p | -                | TGAAGAAGGAGCTGGACTGTAGG   | -                          |
| Novel-mir-285    | CACAGGCAGATGAAGAATGTAAGACCCCGAACCCCAACAGGCCTGTACATTATATCTGGTTGGGCTAATCCCATTCTACACAGGCACGTC         | -19.9 | Novel-mir-285-5p | -                | TGAAGAATGTAAGACCCCGAACCC  | -                          |

|                 |                                                                                                      |            |                  |                  |                                   |                              |
|-----------------|------------------------------------------------------------------------------------------------------|------------|------------------|------------------|-----------------------------------|------------------------------|
| Novel-mir-286-1 | TCCAGCTTCATGAAGAGGCTGTGAACCATACTTCTGTTGTGGATAGGGGCCTCAGATAGAGACGGAA                                  | -23.9      | Novel-mir-286-5p | -                | TGAAGAGGCTGTGAACCATACT            | -                            |
| Novel-mir-286-2 | TCCGGCTTCTGAAGAGGCTGTGAACCATACTTCTGTAGTGTGGATAGGCCCTCAGATAGACGGAA                                    | -28.4      | Novel-mir-286-5p | -                | TGAAGAGGCTGTGAACCATACT            | -                            |
| Novel-mir-286-3 | TCCGGCTTCTGAAGAGGCTGTGAACCATACTTCTGTAGTGTGGATAGGGGCTCAGATAGATGGAA                                    | -24.2      | Novel-mir-286-5p | -                | TGAAGAGGCTGTGAACCATACT            | -                            |
| Novel-mir-286-4 | TCCGGCTTCTGAAGAGGCTGTGAACCATACTTCTGTGTGGATAGGGTTTTCAGATAGACGGAA                                      | -22.6      | Novel-mir-286-5p | -                | TGAAGAGGCTGTGAACCATACT            | -                            |
| Novel-mir-286-5 | TCCGGCTTCTGAAGAGGCTGTGAACCATACTTTTGTAGTGTGGATAGGGGCTCAGATAGACGGAA                                    | -25.9      | Novel-mir-286-5p | -                | TGAAGAGGCTGTGAACCATACT            | -                            |
| Novel-mir-287   | GAAGTCCGATGAAGAGTCCTTGAGTCTGCAGCCTCTGGCAAGTACTGAGGAGTAAACTGGGTAATATAGCACTAA                          | -20.1      | Novel-mir-287-5p | -                | TGAAGAGTCTTGTGAGTCTGCAG           | -                            |
| Novel-mir-288   | GAAGCCACATGAAGTTTGAAGTCTGCAGCTATTGACTCTGCAGAAAGTTGGCAGCCTCTGTGCACTATGTGCCAGCAGCCAC                   | -21.3      | Novel-mir-288-5p | -                | TGAAGTTGAAGTCTGCAGCT              | -                            |
| Novel-mir-289   | AAAAACAGGGTAAATACGGAGGGAATCAGGGAGCTTGTAGTGTGGCAGTGGGGTGAATGATTTCTGGTTGATGAAGGGCCCTA<br>GGAACCGGGCAAG | -25.2      | Novel-mir-289-5p | -                | TGAATACGGAGGGAATCAGGGAGC          | -                            |
| Novel-mir-290   | GCTGATAGAGTACTCACTTATTGTGGAATACATCGTATAACGTTGCACTGCTTTGTTCCACTGAATAAGTGTACGCTTTAAATGGTA              | -24.8      | Novel-mir-290-5p | -                | TGACTCACTTATTGTGGAAT              | -                            |
| Novel-mir-297   | AAAAGACACGTGACTGATGACGTCCGACGCAGAAACTGAGTACTCCTGTGACAGCTCCGTTGATTGATGTCACAACATGAGGTCTT<br>GC         | -23.9      | Novel-mir-297-3p | -                | TGACTGATGACGTCCGACGCA<br>GAA      | -                            |
| Novel-mir-291   | TAAAGAAATTGACTTGAAGATCTGAGGGACCTTTTAGGTTTGTGCAATGCACACTTTCAGTGAGTAAATGGGGTCAACAGTAA<br>ATATCATTG     | -21.1      | Novel-mir-291-5p | -                | TGACTTGAAGATCTGAGGGACC<br>TT      | -                            |
| Novel-mir-292   | GAGAGGGAGTGAGAAAGTCGGTGCAGCCGGGCAACCTGACATGACCGTGTTTTACTGATGCAGCCCCATAA                              | -23.9<br>1 | Novel-mir-292-5p | -                | TGAGAAAGTCGGTGCAGCCGG<br>G        | -                            |
| Novel-mir-293   | CGTCTAGGGATGAGAAGATTCGGCCCTGTAGCTTTGCCAGGACTTCATCTGTATTGGTGAATGTATCGTTCTCTTTTATTG<br>ATCATT          | -21.3      | Novel-mir-293-5p | -                | TGAGAAGATTCGGCCCTGTG<br>AG        | -                            |
| Novel-mir-294-1 | TTTGCTCCGATGAGAAGGCTGGCTTCTGCTGAAGCGGGAAGTCGGAGGCAGAGACTTCTCTGAGCGGAGCACC                            | -33.4      | Novel-mir-294-5p | -                | TGAGAAGGCTGGCTTCTGTA<br>AGC       | -                            |
| Novel-mir-294-2 | TTTGCTCCGGTGAAGGCTGGCTTCTGCTGAAGCGGAGGTGAGAGGCAGAGCCCTTCTCCGAGTAGAG                                  | -25.5      | Novel-mir-294-5p | -                | TGAGAAGGCTGGCTTCTGTA<br>AGC       | -                            |
| Novel-mir-295   | TCAACAATGGTGAAGTACTGCGTTGCCTTGGAGGGGGGAAGACCGGTGTACTCCTCAGAGCCTGTCATTCGGATTGGAGAT                    | -21.7      | Novel-mir-295-5p | -                | TGAGAATGACTGCGTTGCTTG<br>GG       | -                            |
| Novel-mir-296   | GGACTCCAGATGAGATAGGGCTTGTATGCAGCATGTAGTAATGGCGTCATCAACCCAGTCCAGGAGGGT                                | -18.3      | Novel-mir-296-5p | -                | TGAGATAGGGCTTGTATGCAG<br>CA<br>TG | -                            |
| Novel-mir-297   | TGAGCAGGGGTGAGATGCAGAATGACAAGGAGTTTGTGGACCCCTCGCCTCTTGTCTTCTGCTCTCATCCCTCTCATGT                      | -38.9<br>9 | Novel-mir-297-5p | Novel-mir-297-3p | TGAGATGCAGAATGACAAGGA<br>GT       | TCTTTGCTCTTCTGCTCTCATC       |
| Novel-mir-298   | TTGTACAGTTTGAAGGCTGTGATTTCTGCCCATACAGGAGCTAACTGTACAAGTACTGCCTTGCCACGGTTGAGTCCACTCATC<br>AGACCATGCTT  | -26.8      | Novel-mir-298-5p | -                | TGAGGGTCTGTGATTTCTGCC<br>CC<br>AT | -                            |
| Novel-mir-299   | TGGCAGCTCTGAGGTGTGGTCCAGCCTGGTCTTATAGACGCACCCCATGACTGGACATCGCTCATTCTGATGTTTACGCG<br>TCCGCTCGCCAG     | -35.8      | Novel-mir-299-5p | -                | TGAGGTGTTGGTCCAGCCTGG<br>TGC      | -                            |
| Novel-mir-300-1 | TCGCACAAGCTGGGACAGGAGCTCCTGAAGAGGAAGCTGACCATAGTGGAACTATTGCGAGAAACAATTCTGAGCTCCACCCCA<br>ACTTTTGATT   | -31.8      | Novel-mir-300-5p | -                | TGAGTTGATAGTCCGTTCTGT<br>G        | -                            |
| Novel-mir-300-2 | TCGATGAACCTGAGTTGATAGTCCGGTCTGTGAATATTATCAATTTGAGTCTGCATAATCAGATTGGGCTTTATCCC                        | -18        | Novel-mir-300-5p | -                | TGAGTTGATAGTCCGTTCTGT<br>G        | -                            |
| Novel-mir-301   | ATTACTTCATTGATAAAGTTTGGGCCATTAGACAGAGTATTCTAAGACTACTCCTACTGTACCAACTGTCCTCTGTCCAGTTTACC<br>CTGGAAATCT | -19.1      | Novel-mir-301-5p | -                | TGATAAAGTTTGGGCCATTAGA<br>CA      | -                            |
| Novel-mir-302   | GAGAGAAGCTTGATAGCTAAAAGCTCTGCCTCCCATGTGGACTGTGGAATAAGAACTGGCTTTTAGGTTTCCAT                           | -19.8      | Novel-mir-302-5p | -                | TGATAGCTAAAAGCTCTGCCT<br>CC       | -                            |
| Novel-mir-303   | CAAAGCTCTT                                                                                           | -20.8      | Novel-mir-303-5p | Novel-mir-303-3p | TGATGGTTTGAACAATACTTA<br>GGC      | TAGATATTGGGACTTAGCTGCGC<br>T |
| Novel-mir-304   | ATGCAGCAGTTGATGTTGACTTTAAGCTGGACTGTGAAGATCTACTGGATTTTTTGTATGCTGTGATCTAGCATCACTTGCTCCAA               | -23.5      | Novel-mir-304-5p | -                | TGATGTTGACTTTAAGCTGGAC<br>TG      | -                            |
| Novel-mir-305   | TGGAGACTTTTGTATTTGATCCTCTTGTCTGTCTTATTCAAATTTATGTCAGCCAGGAGTTGATCTCTTTTGTCTGCTTTACCAG<br>GTCTTTG     | -23.4      | Novel-mir-305-5p | -                | TGATTTGATCCTTGTCTGTCT<br>G        | -                            |
| Novel-mir-306   | GTGCCTGCTGATTTGGAACACGAGGACAGCAGTCTCTTCTGGTGGTCTCAGGTCCCGAAGTACTCTT                                  | -20.9      | Novel-mir-306-5p | -                | TGATTTGGAACACGAGGACAG<br>CAG      | -                            |



|                 |                                                                                         |            |                  |                  |                           |                            |
|-----------------|-----------------------------------------------------------------------------------------|------------|------------------|------------------|---------------------------|----------------------------|
| Novel-mir-334-1 | CCCAGTCTGGTGGAGGTGGAAGGACGGCCCGTCAGTGTCCCACCTTCTACTGGCGGGCCCTGCTCTTTTGGCCACACCGGGGCAAGC | -49.9      | Novel-mir-334-5p | -                | TGGAGGTGGAAGGACGGCCCGTCA  | -                          |
| Novel-mir-334-2 | CCCAGTCTGGTGGAGGTGGAAGGACGGCCCGTCAGTGTCCCACCTTCTACTGGCGGGCCACTCTTTTGGCCGACCGGGGCAAG     | -45.8      | Novel-mir-334-5p | -                | TGGAGGTGGAAGGACGGCCCGTCA  | -                          |
| Novel-mir-335-1 | CGACACACAGTGGATAACATGAATTTACCAGGGTAGTTTGATACCAGTGGACATCAGGATCCAGGACGTGAATATGCGAAGTCGC   | -20.1      | Novel-mir-335-5p | -                | TGGATAACATGAATTTACCAGG    | -                          |
| Novel-mir-335-2 | GTGACACAGTGGATAACATGAATTTACCAGGGTAGTTCAATACCAGTGGACATCAGGATCCAGGATGTGTAATA              | -19.7      | Novel-mir-335-5p | Novel-mir-335-3p | TGGATAACATGAATTTACCAGG    | CAGTGACATCAGGATCCAGG       |
| Novel-mir-336-1 | AGCCCAACCTCTGGATATGACGCTGAGCAGCGGGCACACAACCTTCTGATCGACTACGGCAGGCGCTGTTCTGAGTGGAACTGTCC  | -26.0<br>3 | Novel-mir-336-5p | Novel-mir-336-3p | TGGATATGACGCTGAGCACGG     | CTGTTCTGAGTGGAACTGTCC      |
| Novel-mir-336-2 | AGCCATCTTCTGGATATGACGCTGAGCAGCGGGCACACAACCTTCTGATCGACCACAGCGAGGCGCTGTTCTGAGTGGAACTGTCC  | -24.8<br>3 | Novel-mir-336-5p | Novel-mir-336-3p | TGGATATGACGCTGAGCACGG     | CTGTTCTGAGTGGAACTGTCC      |
| Novel-mir-337   | GTGGTCGGGCTGGATCTTTTGTGGTAAGCTTGTACTGACAGTAGTGGCGGAAGATGGCCAGCTTTTTTTTTG                | -21.4      | Novel-mir-337-5p | Novel-mir-337-3p | TGGATCTTTTGTGGTAAGCT      | TGCAGTAGTGGCGGAAGATGGCCAGC |
| Novel-mir-338   | CTTAAGTCTCTGGATGTTGTGGGGCTGGCTTGGCTGACACGCTCTGCAATGTACATGGCAGTTGGGGACAGTGA              | -29.4      | Novel-mir-338-5p | -                | TGGATGTTGTGGGGCTGGCTTGGC  | -                          |
| Novel-mir-339   | CTCAAGTCTCTGGATGTTGTGGGGCTGTTTGGCTGACACGCTCTGCAACGTCGATGGCGGTTGGGGACAGTGC               | -28.8      | Novel-mir-339-5p | -                | TGGATGTTGTGGGGCTGTTTGGC   | -                          |
| Novel-mir-340   | CTTACAGCGCTGGATTCAGAGAGACAGAGCTCACGAGGAGAACCCTCTTCTGAATCTAAATTAAGTTTTACAACACATTTATCTT   | -28        | Novel-mir-340-5p | -                | TGGATTCAGAGAGACAGAGCTCA   | -                          |
| Novel-mir-341   | TTCTTCACAGTGGATTTAACTGAACCTGGGGGATGCTCAGTGCCTGGAAATTTCTTGTATCCATCCCAGCTTA               | -19.7      | Novel-mir-341-5p | -                | TGGATTTAACTGAACCTGGGGGA   | -                          |
| Novel-mir-342   | GCATTTTCTATGGATTTGGCATAGGCTGGCATGCATTTCCAGCATGGGGTGCAGGTCAACTCTCTGTGTTTCATGAGACAGTATGG  | -33.9      | Novel-mir-342-5p | -                | TGGATTTGGCATAGGCTGGCATGC  | -                          |
| Novel-mir-343   | CTTCAGACGTTGGATTTTATGATGGGGACGAGGTAAGGTTTTCTCTGCTGACTCTCCATGAAGGTCGTCTGTGTC             | -20.8      | Novel-mir-343-5p | -                | TGGATTTTATGATGGGGACGCA    | -                          |
| Novel-mir-344   | CACCTGTGGTGGCAATGCTCTGCAGAGAGGGCAGTGGAGTCTGGTATCTTCTCCACGGTCCACCACCTCTCTGCAGGTGCTTG     | -47        | Novel-mir-344-5p | -                | TGGCAATGCTCTGCAGAGAGGGC   | -                          |
| Novel-mir-345   | CAGATACACATGGCTAGGAAAGTTCACAGAGGTAATCATGCGATCGCCGTCAGATACACATGGCTAGGAAAGTTCCTCTAGAGGTA  | -22.5      | Novel-mir-345-5p | -                | TGGCTAGGAAAGTTCACAGAGGG   | -                          |
| Novel-mir-346   | TATGGAAGATTGGCTGGTCTGGTGGATTGAGTATAGTTAACGTTTCTACACTGACCACCGTGGGACAGGATTGTGACCTCGT      | -19.9      | Novel-mir-346-5p | -                | TGGCTGGTCTGGTGGATTGAGT    | -                          |
| Novel-mir-347   | GCCCCITTTGATGGGAATGTGGGTGGCCGAGAGCCAAACCTGTTAGTAGGAACGGCCCTACGGCGGCGATCGCCAGGCGTTTGT    | -36.3      | Novel-mir-347-5p | -                | TGGGAATGTGGGTGGCCGAGAGC   | -                          |
| Novel-mir-348-1 | TCACACAAGCTGGGACAGGAGCTCCTGAAGAGGAAGCTGACCATGGTGGGAACATTCACAAAAACAATTTCTGAGCTCCCACCTCA  | -22.3      | Novel-mir-348-5p | -                | TGGGACAGGAGCTCCTGAAGAGG   | -                          |
| Novel-mir-348-2 | TGGAAAGTAAGGGATGCCGTCAAGCTGAAGAAGGAGTCTTTCGAGCCTGGTGGCTCATGGGACTCCTGAGACAGCTGACGGGT     | -46.5      | Novel-mir-348-5p | Novel-mir-348-3p | TGGGACAGGAGCTCCTGAAGAGG   | TCCTGAGACAGCTGACGGGTACT    |
| Novel-mir-349   | CTGAGGACACTGGGACTCACTCCTGGACTGTTGGGTTTGTGCTACTGAAAGACAACAGAAACAGTACATACGGTGAGTTGTAGA    | -27.3      | Novel-mir-349-5p | -                | TGGGACTCACTCCTGGACTGGTGTG | -                          |
| Novel-mir-350   | CACATGAGCTGGGACTGAAGACGTCTCCAGAGTTTCATTTTGTGGTAAGTTTTATATCTTTGCTCCACTTT                 | -19.5      | Novel-mir-350-5p | -                | TGGGACTGAAGACGTGCTCCAGAG  | -                          |
| Novel-mir-351   | CTGCGGACACTGGGATTCACCTCTGGACTGTTGTGGTGTGGTGTGCTGAGGAGAGAGTACAGAAACAGTTAATGGGAGACTGTG    | -27.7      | Novel-mir-351-5p | -                | TGGGATTCACCTCTGGACTGGTGTG | -                          |
| Novel-mir-352   | GACTCATCCATGGGATTGCCAGACAGAGAAGCGGATTCGTTACCCAGAGAACAGCTCCTCACTGCTGTGCGATCCAGTGGCAGCG   | -22        | Novel-mir-352-5p | -                | TGGGATTCAGACAGAGAAGCGG    | -                          |
| Novel-mir-353-1 | AGTACACAGCTGGGATTTACTGTGTAGGGGACTTATTCTACTCCTCTACACCAAGCCAGTTGCTCAGACA                  | -22        | Novel-mir-353-5p | -                | TGGGATTTACTGTGTAGGGGAC    | -                          |
| Novel-mir-353-2 | AGTACACAGCTGGGATTTACTGTGTAGGGGACTTATTCTACTCCTCTACACCAAGCCAGTTGCTCAGGGTGTCTGCAACAACCC    | -33.9      | Novel-mir-353-5p | -                | TGGGATTTACTGTGTAGGGGAC    | -                          |
| Novel-mir-353-3 | CGTACACAGCTGGGATTTACTGTGTAGGGGACTTATTCTACTCCTCTACACCAAGCCAGTTGCTCAGACA                  | -23.9      | Novel-mir-353-5p | -                | TGGGATTTACTGTGTAGGGGAC    | -                          |
| Novel-mir-353-4 | GGTACACAGCTGGGATTTACTGTGTAGGGGACTTATTCTACTCCTCTACACCAAGCCAGTTGCTCAGACA                  | -21.8      | Novel-mir-353-5p | -                | TGGGATTTACTGTGTAGGGGAC    | -                          |
| Novel-mir-354   | GTTACGCTTTGGGACAACGTGTTGAAGCGGAGCTTTAGTCAATGAAGAGTATCCTGATGTAGGAGTCTCCATTTCCAGGTGA      | -22.8      | Novel-mir-354-5p | -                | TGGGGACAACGTGTTGAAGCGG    | -                          |

|                     |                                                                                                           |            |                      |                      |  |                               |                    |
|---------------------|-----------------------------------------------------------------------------------------------------------|------------|----------------------|----------------------|--|-------------------------------|--------------------|
| Novel-mir-355       | AACAGTGTAGTGGGTTGACTGTCAGTGACTCACTCGTGTGCCATCATATAAATCACATGACTGGGTAGCTGAATTGCTCAAGGCCA<br>CTCATTCT        | -32.7<br>2 | Novel-mir-355-<br>5p | -                    |  | TGGGGTTGACTGTCAGTGACT         | -                  |
| Novel-mir-356<br>-1 | CAGGTAGAAGTGGGTATAGAGATGTTGATGACTGGGGCGCTGAGGGATGGCCATGTCTTTAATCTTCTTTGCCAGTCTGTT<br>CCTT                 | -28.5      | Novel-mir-356-<br>5p | Novel-mir-356-<br>3p |  | TGGGTATAGAGATGTTGATG          | TTAATCTTCTTTGCCAGT |
| Novel-mir-356<br>-2 | TAGGTAAAAGTGGGTATAGAGATGTTGATGCCACTGGGGCAGTGTAGGGGTGACCATGTCTTTAATCTTCTTTGCCAGCTGTT<br>CCTT               | -24.3      | Novel-mir-356-<br>5p | -                    |  | TGGGTATAGAGATGTTGATG          | -                  |
| Novel-mir-357       | AAGTCTGACATGGGTTAGAACAATCTGGCAGCTCCACACAGGGTGGAGCAGTCTATATACTGTTGTTAGCAGGTGGGTAAT                         | -25.2      | Novel-mir-357-<br>5p | -                    |  | TGGGTTAGAACAATCTGGCAG         | -                  |
| Novel-mir-358       | CACCCTGCGGTGGTAAATCTGCTGAGAGGGCAGCGGAGTCTGGTGATCTTCCCGCAGTCTTTACCACCTCTCTGCAGGCGC                         | -39        | Novel-mir-358-<br>5p | -                    |  | TGGTAAATCTCTGCTGAGAGG<br>GC   | -                  |
| Novel-mir-359       | CACCCTGCGGTGGTAAATGCACTGCAGAGAGGGCAGTGGAGTCTGGTGATCTTCTCCGAGTCTTTACCAATCTCTGCAGGTGC                       | -35.7      | Novel-mir-359-<br>5p | -                    |  | TGGTAAATGCACTGCAGAGAG<br>GGC  | -                  |
| Novel-mir-360       | CACCCTGCGGTGGTAAATGCTCTACAGAGAGGGCAGGGCGCTCTAGTGATCTTCTCTGCAGTCTTGACCACCTCTCTGCAGGCGC<br>TGCGGTCCATAACAG  | -35        | Novel-mir-360-<br>5p | -                    |  | TGGTAAATGCTCTACAGAGAGG<br>GC  | -                  |
| Novel-mir-361<br>-1 | CACCCTGCGGTGGTAAATGCTCTGCAAGAGGGCAACGGAGTCTGGTGATCTTCTCAGCAATCTTTACCACCTCTCTGCAGGCGC<br>TGCGGTCCATAGCCG   | -32.5      | Novel-mir-361-<br>5p | -                    |  | TGGTAAATGCTCTGCAAGAGAGG<br>GC | -                  |
| Novel-mir-361<br>-2 | CACCCTGCGGTGGTAAATGCTCTGCAAGAGGGCAGTGGAGTCTAGTGATCTTCTCTGCAGTCTTTACCACCAGACAGTATGCA<br>GCTGGTC            | -35.4      | Novel-mir-361-<br>5p | -                    |  | TGGTAAATGCTCTGCAAGAGAGG<br>GC | -                  |
| Novel-mir-361<br>-3 | CACCCTGCGGTGGTAAATGCTCTGCAAGAGGGCAGTGGAGTCTGGTGATCTTCTCTGCAGTCTTTACCACCAGACAGTATGCA<br>GCTGGTC            | -34.1      | Novel-mir-361-<br>5p | -                    |  | TGGTAAATGCTCTGCAAGAGAGG<br>GC | -                  |
| Novel-mir-361<br>-4 | CACCCTGCGGTGGTAAATGCTCTGCAAGAGGGCAGTGGAGTCTAGTGATCTTTCCCGCAGTCTTTACCACCTCTCTGCAGGCGC                      | -34.3      | Novel-mir-361-<br>5p | -                    |  | TGGTAAATGCTCTGCAAGAGAGG<br>GC | -                  |
| Novel-mir-362<br>-1 | CACCCTGCGGTGGTAAATGCTCTGCAAGAGGGCATTGGAGTCTGGTGATCTTCTCTGCAGTCTTTACCACCTCTCTGCAGGCGC                      | -31.2      | Novel-mir-362-<br>5p | -                    |  | TGGTAAATGCTCTGCAGAAAGG<br>GC  | -                  |
| Novel-mir-362<br>-2 | CACCCTGCGGTGGTAAATGCTCTGCAAGAGGGCAGTGGAGTCTAGTGATCTTCTCTGCAGTCTTTACCACCTCTCTGCAGGCGC<br>GCGGTC            | -32.8      | Novel-mir-362-<br>5p | -                    |  | TGGTAAATGCTCTGCAGAGAAG<br>GC  | -                  |
| Novel-mir-362<br>-3 | CACCCTGCGGTGGTAAATGCTCTGCAAGAGGGCAGTGGAGTCTGGTGATCTTCTCTGCAGTCTTTACCACCCCTCTGCAGGTGC                      | -34.7      | Novel-mir-362-<br>5p | -                    |  | TGGTAAATGCTCTGCAGAGAAG<br>GC  | -                  |
| Novel-mir-362<br>-4 | CACCCTGCGGTGGTAAATGCTCTGCAAGAGGGCAGTGGAGTCTGGTGATCTTCTCTGCAGTCTTTACCACCTCTCTGCAGGCGC                      | -37        | Novel-mir-362-<br>5p | -                    |  | TGGTAAATGCTCTGCAGAGAAG<br>GC  | -                  |
| Novel-mir-363<br>-1 | CACCCTGCGGTGGTAAATGCTCTGCAAGAGGGCAGTGGAGTCTGGTGATCTTCCACAGTCTTTACCACCTCTCTGCAGGCGCTTGC<br>AGTCCATAGCAGTAG | -40.5      | Novel-mir-363-<br>5p | -                    |  | TGGTAAATGCTCTGCAGAGAGA<br>GC  | -                  |
| Novel-mir-363<br>-2 | CACCCTGCTGTGGTAAATGCTCTGCAAGAGGGCAGTGGAGTCTGGTGATCTTATTGTGCTTATTATCTTATTTCAGTGTGA                         | -18.8      | Novel-mir-363-<br>5p | -                    |  | TGGTAAATGCTCTGCAGAGAGA<br>GC  | -                  |
| Novel-mir-363<br>-3 | CACCTGCGGTGGTAAATGCTCTGCAAGAGGGCAGTGGAGTCTGGTGATCTTCCACAGTCTTTACCACCTGCTGCAGGTGC                          | -30.4      | Novel-mir-363-<br>5p | -                    |  | TGGTAAATGCTCTGCAGAGAGA<br>GC  | -                  |
| Novel-mir-364<br>-1 | ACCCTGCGGTGGTAAATGCTCTGCAAGAGGGCAGTGGAGTCTGGTGATCTTTACACAGTCTTTACCACCTTTCAGCAGGCA                         | -32.9      | Novel-mir-364-<br>5p | -                    |  | TGGTAAATGCTCTGCAGAGAGG<br>C   | -                  |
| Novel-mir-364<br>-2 | CACCCTGCGGTGGTAAATGCTCTGCAAGAGGGCAGTGGAGTCTGGTGATCTTTCCCGCAGTCTTTACCACCTCTCTGCAGGTGC                      | -33.2      | Novel-mir-364-<br>5p | -                    |  | TGGTAAATGCTCTGCAGAGAGG<br>C   | -                  |
| Novel-mir-365<br>-1 | CACCCTGCGGTGGTAAATGCTCTGCAAGAGGGTGGAGTCTGGTGATCTTCTCAGCAGCAGCACTTACCACCTCTCTGCAGGT<br>GC                  | -40.9      | Novel-mir-365-<br>5p | -                    |  | TGGTAAATGCTCTGCAGAGAGG<br>GT  | -                  |
| Novel-mir-365<br>-2 | CACCCTGCGGTGGTAAATGCTCTGCAAGAGGGTGGAGTCTGGTGATCTTCCACAGTCTTTACCACCTCTCTGCAGGTACTT<br>GCCATCCATAGCAG       | -44.8      | Novel-mir-365-<br>5p | -                    |  | TGGTAAATGCTCTGCAGAGAGG<br>GT  | -                  |
| Novel-mir-365<br>-3 | CACCCTGCGGTGGTAAATGCTCTGCAAGAGGGTGGAGTCTGGTGATCTTCCACAGTCTTTACCACCTCTCTGCAGGCGC<br>TGCGGTCCATAGCAG        | -47        | Novel-mir-365-<br>5p | -                    |  | TGGTAAATGCTCTGCAGAGAGG<br>GT  | -                  |
| Novel-mir-365<br>-4 | CAGCTTGGTGGTAAATGCTCTGCAAGAGGGTGGAGTCTAGTGATCTTCTCTGCAGTCTTTACCACCTCTCTGCAGGCGCTT<br>TGCGTCTGC            | -39.9      | Novel-mir-365-<br>5p | -                    |  | TGGTAAATGCTCTGCAGAGAGG<br>GT  | -                  |
| Novel-mir-366       | CACCCTGCGGTGGTAAATGCTCTGCAAGAGGGTGGAGTCTGGTGATCTTCCACAGTCTTTACCACCTCTCTCTTTAAGG<br>TCT                    | -23.7<br>2 | Novel-mir-366-<br>5p | -                    |  | TGGTAAATGCTCTGCAGAGATG<br>GC  | -                  |
| Novel-mir-367       | CACCCTGCGGTGGTAAATGCTCTGCAAGAGGGGCGAGTGGAACTCTGGTGATCTTCTCTGCAGTCTTTACCACCTCTCTGCAGGCGC                   | -40.3      | Novel-mir-367-<br>5p | -                    |  | TGGTAAATGCTCTGCAGAGGG<br>GCG  | -                  |
| Novel-mir-368<br>-1 | CACCCTGCGGTGGTAAATGCTCTGCAAGAGGGGCGAGTGGAGTCTGGTGATCTTCCCGCAGTCTTTACCACCTCTCTGCAGGTGCT<br>TGTGG           | -33.5      | Novel-mir-368-<br>5p | -                    |  | TGGTAAATGCTCTGCAGAGTGG<br>GC  | -                  |
| Novel-mir-368<br>-2 | CAGCCTGCGGTGGTAAATGCTCTGCAAGAGGGGCGAGTGGAGTCTAGTGATCTTCTCTGCAGTCTTTACCACCTCTCTGCAGGCGC                    | -43.1      | Novel-mir-368-<br>5p | -                    |  | TGGTAAATGCTCTGCAGAGTGG<br>GC  | -                  |

|                  |                                                                                                            |            |                  |                  |                              |                               |
|------------------|------------------------------------------------------------------------------------------------------------|------------|------------------|------------------|------------------------------|-------------------------------|
| Novel-mir-369    | CACCATGCGGTGGTAAATGCTCTGCAGGAGGGCAGTGGACTCCTGGTATCTTCTGCAGCTTTTACCCTCTCTGCAGGCGCT<br>TGCTGCCATACCAGA       | -40.6      | Novel-mir-369-5p | -                | TGGTAAATGCTCTGCAGGGAG<br>GGC | -                             |
| Novel-mir-370-1  | CACCCTGCAGTGGTAAATGCTCTGCGGAGAGGGCAGTGGTGTCTGGTATCTTGTCTGCAGCTTTTACCCTCTCTGCAGGCACT<br>TGACAGTCCATAGCAG    | -39.3      | Novel-mir-370-5p | -                | TGGTAAATGCTCTGCGGAGAG<br>GGC | -                             |
| Novel-mir-370-2  | CACCCTGCGGTGGTAAATGCTCTGCGGAGAGGGCAGTGGAGTCTGTTTACTGTCTGTTTACTGCTTTTCTGCATTGTTGCAC<br>TGTTTGTGA            | -30.7<br>2 | Novel-mir-370-5p | -                | TGGTAAATGCTCTGCGGAGAG<br>GGC | -                             |
| Novel-mir-370-3  | CACCCTGTGGTGGTAAATGCTCTGCGGAGAGGGCAGTGGAGTCTGGTATCTTCTGCAGCTTTTACCCTCTCTGCAGGTGCT<br>TGTGG                 | -37.5      | Novel-mir-370-5p | -                | TGGTAAATGCTCTGCGGAGAG<br>GGC | -                             |
| Novel-mir-370-4  | AACCCTACGGTGGTAAATGCTCTGTAGAGAGGGCAGCGGAGCCCTGGTATCTTCTGCAGCCTTTACCATTCTCTGCAGGTGC                         | -34.3      | Novel-mir-370-5p | -                | TGGTAAATGCTCTGTAGAGAG<br>GC  | -                             |
| Novel-mir-370-5  | CACCCTGCGGTGGTAAATGCTCTGTAGAGAGGGCAGTGGAGTCTGGTATCTTCTACAGCTTTTACCCTCTCTGCAGGTGC                           | -43.7      | Novel-mir-370-5p | -                | TGGTAAATGCTCTGTAGAGAG<br>GC  | -                             |
| Novel-mir-370-6  | CACCCTGCGGTGGTAAATGCTCTGTAGAGAGGGCAGTGGAGTCTGGTATCTTCTGCAGCTTTTACCCTCTCTGCAGGCGC                           | -39.3      | Novel-mir-370-5p | -                | TGGTAAATGCTCTGTAGAGAG<br>GC  | -                             |
| Novel-mir-370-7  | CACCCTGCGGTGGTAAATGCTCTGTAGAGAGGGCAGTGGAGTCTGGTATCTTCTGCAGCTTTTACCCTCTCTGCAGGTGC                           | -39.5      | Novel-mir-370-5p | -                | TGGTAAATGCTCTGTAGAGAG<br>GC  | -                             |
| Novel-mir-370-8  | TTCCCTGTGGTGGTAAATGCTCTGTAGAGAGGGCAGTGGAGTCTGGTATTTTCTCGGTAGTCTTTACCCTCTTTGCAGGTGC                         | -30.9      | Novel-mir-370-5p | -                | TGGTAAATGCTCTGTAGAGAG<br>GC  | -                             |
| Novel-mir-370-9  | CACCCTGCAGTGGTAAATGTTCTGCAGAGAGGGCAGTGGAGTCTGGTATCTTCTCCGACGTCTTTACCCTCTCTGCAGGCGC                         | -34.2      | Novel-mir-370-5p | -                | TGGTAAATGTTCTGCAGAGAG<br>GC  | -                             |
| Novel-mir-370-10 | CACCCTGCGGTGGTAAATGTTCTGCAGAGAGGGCAGTGGAGTCTGGTATCTTCTGCAGCCTTTACCCTCTCTGCAGGCGCT<br>TGTGG                 | -41.5      | Novel-mir-370-5p | -                | TGGTAAATGTTCTGCAGAGAG<br>GC  | -                             |
| Novel-mir-370-11 | CACCCTGCGGTGGTAAATGTTCTGCAGAGAGGGCAGTGGAGTCTGGTATCTTCTGCAGCTTTTACCCTCTTTGTGGACGCTT<br>GCAGTCCA             | -39.8      | Novel-mir-370-5p | -                | TGGTAAATGTTCTGCAGAGAG<br>GC  | -                             |
| Novel-mir-371    | CGCTCTGCGGTGGTAAATCTCTGCAGAGAGGGCAGTGGAGTCTGGTATCTTCTCCACAGCTTTGACCCTCTCTGCAGGCGCT<br>TGCGGTCCATAGCA       | -38.7      | Novel-mir-371-5p | -                | TGGTAAATCTCTGCAGAGAG<br>GC   | -                             |
| Novel-mir-372    | CACCCTGCGGTGGTAAATGCTCTGCAGAGAGGGCAGTGGAGTCTGGTATCTTCTGAAGTCTTTGCCACTCTCTGCAGGCGCT<br>TGCGGTCCGTAGCAG      | -53.1      | Novel-mir-372-5p | -                | TGGTAAAGTCTCTGCAGAGAG<br>GC  | -                             |
| Novel-mir-373    | GTGTCGGATGTGGTAGTCTGAAGCACAGGACGGTCTTCCCCCTTCTGTTACCCTCTACACGTCGGACTT                                      | -22.8      | Novel-mir-373-5p | -                | TGGTAGTCTGAAGCACAGGAC<br>GGT | -                             |
| Novel-mir-374    | GTGGGGTTTATGGTATTATCTGGGTGCTGCACGCCCTCGCCAGTGTGTAATTATTTCTTGTATTATTAGGATGGCAGCCACTAAAT<br>TT               | -18.7<br>4 | Novel-mir-374-5p | Novel-mir-374-3p | TGGTATTATCTGGGTGCTGCA<br>CG  | TTGTTATTAGGATGGCAGC           |
| Novel-mir-375    | CGACGGGTGCTGGTATTGGAGACCCAGCCGAGAAAAGCCCGGCCCTCGACTGGTGGTCTGCTGTGGCACGGGGCCGG                              | -31.8      | Novel-mir-375-5p | Novel-mir-375-3p | TGGTATTGGAGACCCAGCC<br>GAGG  | TCGACTGGTGGTCTGCTGTGGC        |
| Novel-mir-376    | TACCTTGCGGTGGTGAATGCTCTGCAGAGAGGGCAGTGGAGTCTGGTATTTTCCCTGCAGCTTTTACCCTCTCTGCAGGCGCT<br>TGTGGTCCATAGCAGTTGT | -40.6      | Novel-mir-376-5p | Novel-mir-376-3p | TGGTGAATGCTCTGCAGAGAG<br>GGC | CACTCTGCAGGCGCTTGTGGT<br>CCA  |
| Novel-mir-377    | GATATGAGTATGGTAAATCTCAGCTGCCTGACATTGAGAAAGAGGTGCACCGTAGATTAAGGCATTTTAGTGCCTGCGCAGGA<br>TTTGTGCCCTGCACT     | -24.7      | Novel-mir-377-5p | -                | TGGTAAATCTCAGCTGCCTGA<br>CA  | -                             |
| Novel-mir-378    | CAGTTGGTTTTGGTTGTAGACTGTTTTAGGGGATTACTGCATGATCTTCCGGAGTGATAATCGATGCAAGCGTAATCCAGCAGA                       | -20        | Novel-mir-378-5p | -                | TGGTTGTAGACTGTTTTTAGG        | -                             |
| Novel-mir-379    | ACTGAGTTCCTGGTTTGAAGAAGTGGACGTGGCTTTATAATAGAATAGAGCCTTTACTATTAAGTGGCTATGTTCCACAGGCTTTTA<br>AGGTTGCTGGAAT   | -27.6      | Novel-mir-379-5p | -                | TGGTTTGAAGAAGTGGACGTG<br>GC  | -                             |
| Novel-mir-380-1  | TCGGAGTTCCTGGTTTGAAGAAGTGGATGAGGCTTTATAATAGTGTACAGCCTTTATACAGTAAGTTATAGTTCAATTTCTGTGGAA<br>CATTTA          | -22.2      | Novel-mir-380-5p | -                | TGGTTTGAAGAAGTGGATGAG<br>GC  | -                             |
| Novel-mir-380-2  | TCTGAGTTCCTGGTTTGAAGAAGTGGATGAGGCTTTATAATAGAATAGAGCCTTTACCGGTTTAGCATACTACTAAGTCTCTG                        | -25.3      | Novel-mir-380-5p | -                | TGGTTTGAAGAAGTGGATGAG<br>GC  | -                             |
| Novel-mir-380-3  | GTTTAGCATTAGCTCGCAGCACACACATGCCTCCCAATTCAGCAATGTGGTTTTGTTGAGGTGCTGGAATAAATTCGTCA                           | -21.6      | Novel-mir-380-3p | -                | TGGTTTTGTTGAGGTGCTGGA<br>AT  | -                             |
| Novel-mir-380-4  | GTTTAGCATTAGCTCGCAGGCCACACACGCCTCCCAATTCAGCAATGTGGTTTTGTTGAGGTGCTGGAATAAATTCGTCTG                          | -20.5      | Novel-mir-380-3p | -                | TGGTTTTGTTGAGGTGCTGGA<br>AT  | -                             |
| Novel-mir-380-5  | GTTTAGCATTAGCTCGCAGGCCACACACGCCTCCCAATTCAGCAATGTGGTTTTGTTGAGGTGCTGGAATAAATTCGTCTG                          | -21.2      | Novel-mir-380-3p | -                | TGGTTTTGTTGAGGTGCTGGA<br>AT  | -                             |
| Novel-mir-381    | TTGCCACATGTGAAATGTATGGTCTGGCAGGAGTACCACCTCTTTTGTAAAAGACTGAGCCGTAGAATGTGAAAC                                | -18.1      | Novel-mir-381-5p | Novel-mir-381-3p | TGTAATGTATGGTGGCAGG<br>AG    | TTTGTAAAAGACTGAGCCGTAGA<br>AT |
| Novel-mir-382-1  | CACCAGCCACTGTAACAGGAAGAGTGGCAGAGATTCTCAAAGCAACCCACATGTTGGGTAAATTTCTGCCAGCTTCTTCTCATGCA<br>GAAAGTCAAAA      | -32.2      | Novel-mir-382-5p | -                | TGTAACAGGAAGAGTGGCAGA<br>G   | -                             |

|                 |                                                                                                         |       |                  |                    |                              |                               |
|-----------------|---------------------------------------------------------------------------------------------------------|-------|------------------|--------------------|------------------------------|-------------------------------|
| Novel-mir-382-2 | CAGCAGCCACTGTAACAGGAAGAGTGGCAGAGATTCTCAAAGCAACCCACATGTTGGGGTAAATTTCTGCCAGCTTCTTCTCATACA<br>GGAAGGTCAAAA | -32.2 | Novel-mir-382-5p | -                  | TGTAACAGGAAGAGTGGCAGAG       | -                             |
| Novel-mir-382-3 | CAGCAGCCACTGTAACAGGAAGAGTGGCAGAGATTCTCAAAGCAACCCACATGTTGGGGTAAATTTCTGCCAGCTTCTTCTCATGCA<br>GGAAGGTCAAAA | -32.2 | Novel-mir-382-5p | -                  | TGTAACAGGAAGAGTGGCAGAG       | -                             |
| Novel-mir-382-4 | CAGCAGCCACTGTAACAGGAAGAGTGGCAGAGATTCTCAATGCAACCCACATGTTGGGGTAAATTTCTGCCAGCTTCTTCTCATGCA<br>GGAAGGTCAAAA | -33.1 | Novel-mir-382-5p | -                  | TGTAACAGGAAGAGTGGCAGAG       | -                             |
| Novel-mir-382-5 | CAGCAGCCGCTGTAACAGGAAGAGTGGCAGAGATTCTCAAAGCAACCCACATGTTGGGGTAAATTTCTGCCAGCTTCTTCTCATGCA<br>GGAAGGTCAAAA | -32.2 | Novel-mir-382-5p | -                  | TGTAACAGGAAGAGTGGCAGAG       | -                             |
| Novel-mir-382-6 | CCCCAGCCACTGTAACAGGAAGAGTGGCAGAGATTCTCAAACAACCCACATGTTGGGGTAAATTTCTGCCAGCTTCTTCTCATGCA<br>GGAAGGTCAAAA  | -33.2 | Novel-mir-382-5p | -                  | TGTAACAGGAAGAGTGGCAGAG       | -                             |
| Novel-mir-382-7 | CCCCAGCCACTGTAACAGGAAGAGTGGCAGAGATTCTCAAAGCAACCCACATGTTGGGGTAAATTTCTGCCAGCTTCTTCTCATGCA<br>GGAAGGTCAAAA | -32.2 | Novel-mir-382-5p | -                  | TGTAACAGGAAGAGTGGCAGAG       | -                             |
| Novel-mir-383   | CAGCAGCCACTGTAACAGGAAGAGTGGCAGAGATTCTCAAAGCAACCCACATGTTGGGGTAAATTTCTGCCAGCTTCTTCTCATGCA<br>GGAAGGTCAAAA | -32.5 | Novel-mir-383-5p | -                  | TGTAACAGGAAGAGTGGCAGAG       | -                             |
| Novel-mir-384   | TCTCCACAGATGTAATTCAGAGTGGACGACGGTGTGGAAAGGAGCCGTTCCAGTGTGTTGCCTGGAATGACTACTCTCTGCCTG<br>CA              | -27.5 | Novel-mir-384-5p | -                  | TGTAATTCAGAGTGGACGACGG       | -                             |
| Novel-mir-385-1 | TTCTCAGTCTGTACTTTGCAGCTTTGACTCTGTCTCATTGCCTGATTTGAATGCAAGACAGCAAGCATGCAGCATGGCGTACCT<br>GCTGTGTGC       | -25.6 | Novel-mir-385-5p | -                  | TGTAATTCAGAGTGGACGACGG       | -                             |
| Novel-mir-385-2 | TTCTCAGTCTGTACTTTGCAGCTTTGACTCTGTCTCGTGCCTGATCTGAATGCATGAGAGTGATAATGCAGCATGGCGTACCT<br>GACTGTTTTA       | -22.3 | Novel-mir-385-5p | -                  | TGTAATTCAGAGTGGACGACGG       | -                             |
| Novel-mir-386   | CAGTCATTGGTGTAGAGTGAACACAGCAGAGGGTCCAATGTCGGATGCTGGATGGTTTTCCAGCTGCACCTGTTCAAA                          | -26.2 | Novel-mir-386-5p | -                  | TGTAGAGTGAACACAGCAGAG        | -                             |
| Novel-mir-387   | CAGACAAGTCTGAGGCTGTACAGAATGCTGGGTTCCCTTTAGAGGATTCTGTGGTTTTCTGAAGATGTACACTGG                             | -18.7 | Novel-mir-387-5p | -                  | TGTAGGCTGTACAGAATGTCTG       | -                             |
| Novel-mir-388-1 | AGAGATCTGTTGATTAGAAGATGTTGGTGTAGCCAGGATGCTCCTCAGGCTGTTAAATGCAAGGTTAGTTAAAGCAGAGAAAGG<br>CGG             | -19.2 | Novel-mir-388-5p | Novel-mir-388-3p   | TGTATTAGAAGATGTTGGTGTA<br>GC | TAAATGCAAGGTTAGTTAAAGCA<br>G  |
| Novel-mir-388-2 | AGAGGCTGTTGATTAGAAGATGTTGGTGTAGCCAGGATGCTCCTCAGGCTGTTAAATGCAAGGTTAGTTAAAGCAGAGAAAGG<br>TGCA             | -21.9 | Novel-mir-388-5p | -                  | TGTATTAGAAGATGTTGGTGTA       | -                             |
| Novel-mir-389-1 | ACCTTATAAATGATTAGGTTCTGTGTGGCGGGGGAACTCCACTTTCCAGCGCCTGTGTGTGTGTCTGGA                                   | -20.6 | Novel-mir-389-5p | -                  | TGTATTAGGTTCTGTGTGGCGG       | -                             |
| Novel-mir-389-2 | ACCTTATAAATGATTAGGTTCTGTGTGGCGGGGGAACTCCACTTTCCAGCGCCTGTGTGTGTGTGTCTGGA                                 | -24.3 | Novel-mir-389-5p | -                  | TGTATTAGGTTCTGTGTGGCGG       | -                             |
| Novel-mir-389-3 | ACCTTATAGATGATTAGGTTCTGTGTGGCGGGGGAAACTCCACTTTCCAGCGCCTGTGTGTGTGTCTGGA                                  | -18.1 | Novel-mir-389-5p | -                  | TGTATTAGGTTCTGTGTGGCGG       | -                             |
| Novel-mir-390   | GTTAGTATCTTGATTTCTTTGATGCTATTATTCTGTGCATATTGCTGCTGTAGAGGCTCAATGAAAATGGCAATAGAGATGGTGAG<br>AGTGGGCA      | -18.6 | Novel-mir-390-5p | -                  | TGTATTCTTTGATGCTATTATT       | -                             |
| Novel-mir-391-1 | ACATGCTGTCTGATTGGGCAGTTCGTGGGAGAGATTGCTCTGTAAAGTCCCTAGAACAATGAGTAGAGAGTCCAGGATGTT                       | -23   | Novel-mir-391-5p | -                  | TGTATTGGGCAGTTCGTGGGA<br>GA  | -                             |
| Novel-mir-391-2 | ACATGCTGTCTGATTGGGCAGTTCGTGGGAGAGATTGCTCTGTAAAGTCCCTAGAACAATGAGTAGAGAGTCCAGGATGTT                       | -25.4 | Novel-mir-391-5p | Novel-mir-391-1-3p | TGTATTGGGCAGTTCGTGGGA<br>GA  | TCCTAGAACAATGAGTAGGAGA        |
| Novel-mir-391-3 | ATGTGCTGTCTGATTGGGCAGTTCGTGGGAGAGATTGCCCTGTTAATGTCCTTAGAACAATGAGTAGAGAGTCCAGGATGTT                      | -20.5 | Novel-mir-391-5p | Novel-mir-391-2-3p | TGTATTGGGCAGTTCGTGGGA<br>GA  | CCCTAGAACAATGAGTAGGAGA        |
| Novel-mir-391-4 | ATGTGCTGTCTGATTGGGCAGTTCGTGGGAGAGATTGCTTTGTTAAAGTCCCTAGAACAATGAGTAGAGAGTCCAGGATGTTCC                    | -22   | Novel-mir-391-5p | Novel-mir-391-3-3p | TGTATTGGGCAGTTCGTGGGA<br>GA  | TCCTAGAACAATGAGTAGGAGAT<br>C  |
| Novel-mir-392   | AGAGCAGTGTCTGTTCTTGTGTGTCACCTGTTGAGAGATGCTACACAGTGTATTCAAGTTCGTGCATATTACACAAGGCCCT<br>CATGTTGTAACATA    | -20.7 | Novel-mir-392-5p | Novel-mir-392-3p   | TGTCACCTGTTGAGAGATGCTC<br>A  | TGCATATTACACAAGGCCCTCAT<br>G  |
| Novel-mir-393   | GTTTGTGGGATGTCATGTAATCACTTTGGATCGAGTGTTCAGAGACAGGATATCCCTATTTAGTGTCTTCATTTGAATCTGTCT<br>TTGCA           | -22   | Novel-mir-393-5p | -                  | TGTCATGTAATCACTTTGGAT<br>CG  | -                             |
| Novel-mir-394-1 | CTAGTCTCCGTGCCAGAGATCGGGCCGTCGGGGCCCTGCCTTCGACTGCTGCCAATCCACTATGCACCGGCCAGTCCAGA                        | -25.6 | Novel-mir-394-5p | -                  | TGCCAGAGATCGGGCCGTCG<br>G    | -                             |
| Novel-mir-394-2 | CTAGTCTCCGTGCCAGAGATCGGGCCGTCGGGGCCCTGCCTTCGACTGCTGCCAATCCACTATGCACCGGCCCTTATGGAT<br>CCT                | -26.4 | Novel-mir-394-5p | -                  | TGCCAGAGATCGGGCCGTCG<br>G    | -                             |
| Novel-mir-394-3 | CTAGTCTCCGTGCCAGAGATCGGGCCGTCGGGGCCCTGCCTTCGACTGCTGCCAATCCACTATGCACCGGCCCTTATGGAT<br>CCT                | -29.8 | Novel-mir-394-5p | Novel-mir-394-3p   | TGCCAGAGATCGGGCCGTCG<br>G    | GACTGCTGCCAATCCACTGTGC<br>ACC |
| Novel-mir-395   | GCTTGGCCGTGCTATGTGATGCTGGACCAGGCTCGTCCGGTGCAGTCTCATCACAGGCAGCAAAAATGTCCAAGA                             | -28   | Novel-mir-395-5p | -                  | TGTCTATGTGATGCTGGACCAG<br>GC | -                             |





|                 |                                                                                        |            |                  |                  |                          |                         |
|-----------------|----------------------------------------------------------------------------------------|------------|------------------|------------------|--------------------------|-------------------------|
| Novel-mir-414   | TGGGGTCTGATGTGTGATGTGGGCAAGCAGCCAGCCGCTCAATGGCCGGGTCTCTATAGCACAGGGTAGCGGCTCCAG         | -26.5      | Novel-mir-414-5p | -                | TGTGTGATGTGGGCAAGCAGC    | -                       |
| Novel-mir-415   | CTGCATCGCTTGTGTGACGACCGTTTAAAGCCATTATAATGTGTGCAGTTTTACTATTGCTCGGCCAATGACGCAACATGCCT    | -22.1      | Novel-mir-415-5p | Novel-mir-415-3p | TGTGTGACGACCGTTTAAAGCCCA | TCACTATTGCTCGGCCAATTGCA |
| Novel-mir-416   | AAGGTCAAGATGTGTTCTTAGAATTTACAGATGAAAAGTCCCTGGGGCAAAAATCATCAATGAGGGGTGAGAACGAGTCAACCG   | -19.4      | Novel-mir-416-5p | -                | TGTGTTCTTAGAATTTACAGAT   | -                       |
| Novel-mir-417   | TTAGCCGCCATGTGTTGGAGTTTACCCAGTGAACGAGAGGGTTCGCTTCCCTGCGCCTTCGAGTCAAGGATAGTCTCTCAATGCC  | -29.4      | Novel-mir-417-5p | -                | TGTGTTGGAGTTTACCCAGTGA   | -                       |
| Novel-mir-418   | TTAGCCGCCATGTGTTGGAGTTTACCCAGTGAACGAGAGGGGTTCGCTTCCCTGCGCCTTCGCGCCGGGTTAGTCTCTCACT     | -33.1      | Novel-mir-418-5p | -                | TGTGTTGGAGTTTACCCAGTGA   | -                       |
| Novel-mir-419-1 | CTGCCACCGCTGTGTTGACTGTAAGGATGGTATTAATAAGTGATGCTCAATGCCTGGTTTTCTCCACACATGCAGTTGGAACTG   | -28.5      | Novel-mir-419-5p | -                | TGTGTTGACTGTAAGGATGGT    | -                       |
| Novel-mir-419-2 | TTCCACCTCTGTGTTGACTGTAAGGATGGTGTCTTAGGGTCATACTCAGCATTTTTCTTCCCAACACAGCGAGTCAAGT        | -21        | Novel-mir-419-5p | -                | TGTGTTGACTGTAAGGATGGT    | -                       |
| Novel-mir-420   | AGGTCCAACATGTTATAGAAGACGACGACTGCCATCTGTGGTGGTGGCTCTTGTGGAGTACTGTCTGATCA                | -23.8      | Novel-mir-420-5p | -                | TGTTATAGAAGACGACGACTGC   | -                       |
| Novel-mir-421-1 | CTAGAGAGGGTGTATGAGCATATCCACCCAGGGCAACAAGTGGCTCCAGTCCCCTGGTGGAGAACTGGTAACACAGCGGAGG     | -29.8      | Novel-mir-421-5p | Novel-mir-421-3p | TGTTATGAGCATATCCACCCA    | TGGTGAGAACTGGTAACACA    |
| Novel-mir-421-2 | CTAGAGAGTGTGTTATGAGCATATCCACCCAGGGCAACAAGTGGCTCCAGTCCCTGGTGGAGAACTGGTGACACAGCGGAGGG    | -32.7      | Novel-mir-421-5p | Novel-mir-421-3p | TGTTATGAGCATATCCACCCA    | TGGTGAGAACTGGTGACACA    |
| Novel-mir-422   | TAAAAGTGGGTGTTCAACTATGGCTGTGGATATTGGCTGTTCCCTACTCCAGTCCGAGTGGCATCCATAGGCC              | -23.2      | Novel-mir-422-5p | -                | TGTTCAACTATGGCTGTGGAT    | -                       |
| Novel-mir-423   | ACATTAACACTGTTTCATCGATGGAGTCCAGGTGGAGAGGGTGGCCGCTTTTGGGTTCTGGGCGTCATCTTTGAGCAGCACCTGAC | -34.2      | Novel-mir-423-5p | -                | TGTTTCATCGATGGAGTCCAGGT  | -                       |
| Novel-mir-424-1 | ATTAAGCCACTGTTTCATCGATGGAGTCCAGGTGGAGAGGGTGGCCGCTTTTGGGTTCTGGGCGTCATCTTTGAGCAGCACCTGAC | -36        | Novel-mir-424-5p | -                | TGTTTCATCGATGGAGTCCAGGT  | -                       |
| Novel-mir-424-2 | ATTAAGCCACTGTTTCATCGATGGAGTCCAGGTGGAGAGGGTGGCCGCTTTTGGGTTCTGGGCGTCATCTTTGAGCAGCACCTGAC | -40        | Novel-mir-424-5p | -                | TGTTTCATCGATGGAGTCCAGGT  | -                       |
| Novel-mir-425   | AGGTGGTCTTGTCTTTGATCGTTCTGTCCACCTCTCTATTGACCAGGCTCCCGCAATCAAAAAGTGGATGCCCTC            | -22.5<br>4 | Novel-mir-425-5p | -                | TGTTCTTTGATCGTTCTGTCT    | -                       |
| Novel-mir-426   | TTATATCGGGTGTGAAGATGTCTGTAAGGGCAGAGGGGCGCCGATGATCTTCTGGCTGTTTTCACTATGCGTTGTAGG         | -26.4      | Novel-mir-426-5p | -                | TGTTGAAGATGTCTGTAAGGG    | -                       |
| Novel-mir-427   | CTGAGTCAGCTGTTTAGAAGTCTGATGGCAGAGGAAAGAAAGATTTTTCACTCTAAGGTCCTGCATTTACATTTCTGAGCTCCG   | -28.2      | Novel-mir-427-5p | -                | TGTTTAGAAGTCTGATGGCAGA   | -                       |
| Novel-mir-428   | TCCTGTCAGCTGTTTAGGAGTCCGATGGCAGAGGGAAAGAAAGATTTTTCACTCTAGAGTCTGCATTTACACTTCTGAACTCT    | -29.1      | Novel-mir-428-5p | Novel-mir-428-3p | TGTTTAGGAGTCCGATGGCAGA   | GCATTTACACTTCTGAACTCTG  |
| Novel-mir-429   | CTCAGTCAGCTGTTTAGGAGTCCGATGGCAGAGGGAAAGAAAGATTTTTCACTCTAAGGTCCTGCATTTACACTTCTGAGCCTC   | -25.6<br>1 | Novel-mir-429-5p | Novel-mir-429-3p | TGTTTAGGAGTCCGATGGCAGA   | CTGCATTTACACTTCTGAGCCT  |
| Novel-mir-430   | CTGAGTTAGCTGTTTAGGAGTCTGATAGCAGAGGGGAAGGAAGAGTCTTCACTCTAGAGTCTGCATTTACACTTCTGATCCTC    | -23.4      | Novel-mir-430-5p | -                | TGTTTAGGAGTCTGATAGCAGA   | -                       |
| Novel-mir-431   | ACTCCTCAGCTGTTTAGGAGTCTGATGCAGAGGAAAGAAAGATTTTTCACTCTAGAGTCTGCATTTACACTTCTGAACTCTC     | -22.2      | Novel-mir-431-5p | -                | TGTTTAGGAGTCTGATAGCAGA   | -                       |
| Novel-mir-432   | AGGTAGATCCTGTTTAGGAGTCTGATGGCAAGGGAAAGAAAGAGTTTTCACTCTAGAGTCTGCATTTACACTTCTGAGCCTC     | -22.9      | Novel-mir-432-5p | -                | TGTTTAGGAGTCTGATGGCAAA   | -                       |
| Novel-mir-433-1 | ACTCCTCAATTTTAGGAGTCTGATGGCAGAGAGAAAGAAAGATTTTTCACTCTAGAGTCTGCATTTACACTTCTGAACTCTC     | -26.2<br>2 | Novel-mir-433-5p | -                | TGTTTAGGAGTCTGATGGCAGA   | -                       |
| Novel-mir-433-2 | ACTCCTCAGCTGTTTAGGAGTCTGATGGCAGAGAGATTTTTCACTCTAGTGGTCTGCATTTACACTTCTGAACTCTGAGCAGAG   | -23.5<br>1 | Novel-mir-433-5p | -                | TGTTTAGGAGTCTGATGGCAGA   | -                       |
| Novel-mir-433-3 | CTGAGTCAGCTGTTTAGGAGTCTGATGGCAGAGAGAAAGAAAGATTTTTCACTCTAGAGTCTGCACACTTCTGAACTCTGAGC    | -26.4      | Novel-mir-433-5p | -                | TGTTTAGGAGTCTGATGGCAGA   | -                       |
| Novel-mir-433-4 | GTGGTCAGCTGTTTAGGAGTCTGATGGCAGAGATTTTTCACTCTAGTGGTCTGCATTTACACTTCTGAGCCTCCGACCGGAG     | -28.1<br>2 | Novel-mir-433-5p | Novel-mir-433-3p | TGTTTAGGAGTCTGATGGCAGA   | TGCATTTACACTTCTGAGCCTC  |
| Novel-mir-433-5 | CTGAGTCAGCTGTTTAGGAGTCTGATGGCAGAGAGAAAGAAAGATTTTTCACTCTAGTGGTCTGCATTTACACTTCTGAACTCTC  | -27.5      | Novel-mir-433-5p | -                | TGTTTAGGAGTCTGATGGCAGA   | -                       |
| Novel-mir-433-6 | GTGGTCAGCTGTTTAGGAGTCTGATGGCAGAGATTTTTCACTCTAGTGGTCTGCATTTACACTTCTGAGCCTCCGACCGGA      | -28.1<br>2 | Novel-mir-433-5p | -                | TGTTTAGGAGTCTGATGGCAGA   | -                       |

|                 |                                                                                                          |            |                  |                  |                              |                               |
|-----------------|----------------------------------------------------------------------------------------------------------|------------|------------------|------------------|------------------------------|-------------------------------|
| Novel-mir-434   | CTGAGTCAGCTGTTTAGGAGTCTGATGGCAGGGGAAAGAAAGAGTTTTTCAGTCTAGAGGTCCTGGATTTACACTGCTGAGCCT<br>CAAACCGGA        | -22.9      | Novel-mir-434-5p | -                | TGTTTAGGAGTCTGATGGCAGG<br>GG | -                             |
| Novel-mir-435   | CTGAGTCAGCTGTTTAGGAGTCTGATGGCCGAGGGAAAGAAAGAGTTTTTCAGTCTAGTGGTCGCAATTTACACTTCTGAACCTC<br>TGCCAGAAAGGTAG  | -33.7      | Novel-mir-435-5p | -                | TGTTTAGGAGTCTGATGGCAT        | -                             |
| Novel-mir-436   | CTGAGTCAGCTGTTTAGGAGTCTGATGGCATAGGGAATGAAAGAGTTTTTCAGTCTAGTGGTCTGCATTTACACTTCTGAACCTCC<br>GACTGGA        | -23.9      | Novel-mir-436-5p | -                | TGTTTAGGAGTCTGATGGCATA       | -                             |
| Novel-mir-437-1 | ACTCCTCAGCTGTTTAGGAGTCTGATGGCCGAGGGAAAGAAAGAGTTTTTCAGTCTAGTGGTCTGCATTTACACTTCTGAATCTC<br>CGGCCAGAGGGCA   | -29.8      | Novel-mir-437-5p | Novel-mir-437-3p | TGTTTAGGAGTCTGATGGCCGA<br>GG | TGCATTTACACTTCTGAATCTCC<br>GG |
| Novel-mir-437-2 | ATGCCTCAGCTGTTTAGGAGTCTGATGGCCGAGGGAAAGAAAGAGTTTTTCAGTCTAGAGTCTGCATTTACACTTCTGAATCTC<br>CGGCCAGAGGGCA    | -29.7      | Novel-mir-437-5p | Novel-mir-437-3p | TGTTTAGGAGTCTGATGGCCGA<br>GG | TGCATTTACACTTCTGAATCTCC<br>GG |
| Novel-mir-437-3 | ACTCTTCAGCTGTTTAGGAGTCTGATGGCCGAGGGAAAGAAAGAGTTTTTCAGTCTTACCACCTCTGCAAGGCTCTTGGGTCCT<br>AGCGGTA          | -29.5      | Novel-mir-437-5p | Novel-mir-437-3p | TGTTTAGGAGTCTGATGGCCGA<br>GG | CTCTCTGCAGGCTCTTGGGTT         |
| Novel-mir-438-1 | ACTCCTCAGCTGTTTAGGAGTCTGATGGTAGAGGCAAGAAAGAGTTTTTCAGTCTAGAGTCTGCATTTACACTCCGGCCAGAG<br>TGTAGGAAG         | -28.5      | Novel-mir-438-5p | -                | TGTTTAGGAGTCTGATGGTAGA       | -                             |
| Novel-mir-438-2 | ACTCCTCAGCTGTTTAGGAGTCTGATGGTAGAGGCAAGAAAGAGTTTTTCAGTCTAGTGGTCTGCATTTCAAACCTCTAAGGGTA<br>GGGAGG          | -26.5      | Novel-mir-438-5p | -                | TGTTTAGGAGTCTGATGGTAGA<br>GG | -                             |
| Novel-mir-438-3 | ACTCCTCAGCTGTTTAGGAGTCTGATGGTAGAGGCAAGAAAGAGTTTTTCAGTCTGGAGTCTACACTTAACACTTCTGAACCTC<br>CGGTCAGAGGGTA    | -25.4      | Novel-mir-438-5p | -                | TGTTTAGGAGTCTGATGGTAGA<br>GG | -                             |
| Novel-mir-438-4 | ACTCCTCAGCTGTTTAGGAGTCTGATGGTAGAGGCAAGAAAGAGTTTTTCGGTCTAGTAGTGTGCATTTACACTTCTGAACCTCT<br>GGCCAGAGGGTA    | -28        | Novel-mir-438-5p | Novel-mir-428-3p | TGTTTAGGAGTCTGATGGTAGA<br>GG | GCATTTACACTTCTGAACCTCTG<br>GC |
| Novel-mir-439-1 | ACTCCTCAGCTGTTTAGGAGTCTGATTGCAGAGGGAAAGAAAGAGTTTTTCAGTCTGGAGTCTACACTTCTGAACCTGCGGCCAG<br>AGGTTAGGGAGA    | -31.3      | Novel-mir-439-5p | -                | TGTTTAGGAGTCTGATTGCAGA       | -                             |
| Novel-mir-439-2 | ACTCCTCAGCTGTTTAGGAGTCTGATTGCAGAGGAAATAAGAGTTTTTCAGTCTGGAGTCTACACTTCTGAACCTTCTGAACCTTC<br>GGCCAGAAAGGTAG | -25.7      | Novel-mir-439-5p | -                | TGTTTAGGAGTCTGATTGCAGA<br>GG | -                             |
| Novel-mir-440-1 | CTGAGTCAGCTGTTTAGGAGTGTGATGGCAGTCGGTTTTTCAGCCTAGAGGTCCTGCATTTACACGCTGAGCCTCCGACCGGA                      | -30        | Novel-mir-440-5p | -                | TGTTTAGGAGTCTGGTGGCAGA<br>GG | -                             |
| Novel-mir-440-2 | CTGAGTCAGCTGTTTAGGAGTCTGGTGGCAGAGGGAAAGAAAGAGTTTTTCAGTCTAGAGGTCCTGTCTTTACACTTCTGAGCCTC<br>TGAAGGTA       | -28.9      | Novel-mir-440-5p | -                | TGTTTAGGAGTCTGGTGGCAGA<br>GG | -                             |
| Novel-mir-441   | TCCTGTCAAGCTGTTTAGGAGTCTGTTGGCAGAGGGAAAGAAAGAGTTTTTCAGCCTAGAGGTCATGCATTTACACTTCTGAACCTC<br>CGGCCGAG      | -27.6      | Novel-mir-441-5p | -                | TGTTTAGGAGTCTGTTGGCAGA<br>GG | -                             |
| Novel-mir-442-1 | ACTCCTCAGCTGTTTAGGAGTGTGATGGCAGAGGGAAAGAAAGAGTTTTCAGTCTAGAGTCTACACTTACACTTCTGAACCTC<br>CGGCCAGAGGGTA     | -27.5      | Novel-mir-442-5p | -                | TGTTTAGGAGTGTGATGGCAGA<br>GG | -                             |
| Novel-mir-442-2 | TCCTGTCAAGTGTGTTTAGGAGTGTGATGGCAGAGGGAAAGAAAGAGTTTTCAGTCTAGAGGTCCTGTATTTACACTTCTGTACCTCT<br>GGCCTGAGGGT  | -30.7      | Novel-mir-442-5p | -                | TGTTTAGGAGTGTGATGGCAGA<br>GG | -                             |
| Novel-mir-443   | CTGAGTCAGCTGTTTAGGAGTGTGATGGCAGTGGAAAGAAAGAGTTTTTCAGTCTGGAGTCTGCATTTACACTTCTGAGCCTC<br>TGACCAGAGCACA     | -34.4      | Novel-mir-443-5p | Novel-mir-182-3p | TGTTTAGGAGTGTGATGGCAGT<br>AG | CATTTACACTTCTGAGCCTCTGA       |
| Novel-mir-444   | AGTAGCCGGGTGTTTACCAACCGCAGGAGGTGAGGAGATGGAGAGCTGGCCGAGCTGTGATGGTGGGGTCACTCCTGGGCTG<br>GTCGAC             | -30.2      | Novel-mir-444-5p | Novel-mir-444-3p | TGTTTAGGAGTGTGATGGCAGT<br>AG | TGTGATGGTGGGGTCACTCCTGG       |
| Novel-mir-445-1 | CTGGAGGAAGTGTGTTGGAGAGAGGGAAGTCTGGGCATCTTGTCTAGACTGCTGCCCGCGACCCAGTCCAGATA                               | -28.8      | Novel-mir-445-5p | -                | TGTTTAGGAGAGGGGAAGTCT<br>GG  | -                             |
| Novel-mir-445-2 | CTGGAGGAAGTGTGTTGGAGAGAGGGAAGTCTGGGCATCTTGTCTAGACTGCTGCCCGCGACTCGTCCCGGA                                 | -27.2      | Novel-mir-445-5p | -                | TGTTTAGGAGAGGGGAAGTCT<br>GG  | -                             |
| Novel-mir-446-1 | ATTAAGTGATTGTTTAGTGTGGGACCCGTGATGTTCTACAAGAGGGTCTGGCAAGGATGTAATAGTTGTTGTCT                               | -18.9      | Novel-mir-446-5p | -                | TGTTTAGTGTGGGACCCGT<br>AG    | -                             |
| Novel-mir-446-2 | ATTACGAGATTGTTTAGTGTGGGACCCGTGATGTTCTACAATAGGGTCTGGCAAGGATGTAATAGTTGTTGT                                 | -20.3      | Novel-mir-446-5p | -                | TGTTTAGTGTGGGACCCGT<br>AG    | -                             |
| Novel-mir-446-3 | ATTGTTGATTGTTTAGTGTGGGACCCGTGATGTTCCACAATAGGGTCTGGCAAGGATGTAATAGGAGTGTGTTAGATTTTCATTT<br>CATA            | -20.9      | Novel-mir-446-5p | -                | TGTTTAGTGTGGGACCCGT<br>AG    | -                             |
| Novel-mir-447   | TGAAGAGTTTTTAAGATTGATAGATAAGCATGCACCGTCCGCTCTTTAGAGTGAAGGGCGTGATAATCTTGGTTTTGTTGGAA<br>ATTGGTAA          | -26.3      | Novel-mir-447-5p | -                | TTAAGATTGATAGATAAGCATG<br>CA | -                             |
| Novel-mir-448   | TGAAGAGTTTTTAAGATTGATAGATAAGCATGCACCGTCCGCTCTTTAGAGTGAAGGGCGTGATAATCTTGGTTTTGTTGGAA<br>ATTGGTAA          | -23.9      | Novel-mir-448-5p | -                | TTAAGATTGATAGATAAGCATG<br>CG | -                             |
| Novel-mir-449-1 | GGCCTGTCTTTACAATTAGAAGCTGAGGTGGGAGCTCAGTCTGTTTCTCTAATTGTGCCAACATTGTCAGCTTCTTTTGGAA<br>GTTCTGTCC          | -26.2      | Novel-mir-449-5p | -                | TTACAATTAGAAGCTGAGGTGG<br>GA | -                             |
| Novel-mir-449-2 | GGCCTGTCTTTACAATTAGAAGCTGAGGTGGGAGCTCAGTCTGTTTCTCTAATTGTGCCAACATTGTCAGCTTCTTTTGGAA<br>GTTCTGTCC          | -25.8<br>2 | Novel-mir-449-5p | -                | TTACAATTAGAAGCTGAGGTGG<br>GA | -                             |

|                 |                                                                                                           |            |                  |                  |                               |                                |
|-----------------|-----------------------------------------------------------------------------------------------------------|------------|------------------|------------------|-------------------------------|--------------------------------|
| Novel-mir-449-3 | GGCCTGTTCTTTACAATTAGAAGCTGAGGTGGGAGCTCAGTCTCTGTTTTTCTAACTGTGCCAACCTTGTGAGCTTTCTTTTGAGAA<br>GTTCTCTGTCC    | -28.5      | Novel-mir-449-5p | -                | TTACAATTAGAAGCTGAGGTGG<br>GA  | -                              |
| Novel-mir-449-4 | GGCCTGTTCTTTACAATTAGAAGCTGAGGTGGGAGCTCAGTCTCTGTTTTTCTAAATTATGCCAACCTTGTGAGCTTTCTTTTGAGAA<br>GTTCTCTGTCC   | -22.6      | Novel-mir-449-5p | -                | TTACAATTAGAAGCTGAGGTGG<br>GA  | -                              |
| Novel-mir-449-5 | GGCCTGTTCTTTACAATTAGAAGCTGAGGTGGGAGCTCAGTCTCTGTTTTTCTAAATTGTGCCAACCTTGTGAGCTTTCTTTTGAGAA<br>AGITCTCTGTCC  | -25.7<br>4 | Novel-mir-449-5p | -                | TTACAATTAGAAGCTGAGGTGG<br>GA  | -                              |
| Novel-mir-449-6 | GGTCTGTTCTTTACAATTAGAAGCTGAGGTGGGAGCTCAGTCTCTGTTTTTCTAAATTGTGCCAACCTTGTGAGCTTTCTTTTGAGAA<br>AGITCTCTGTCC  | -18.8      | Novel-mir-449-5p | Novel-mir-449-3p | TTACAATTAGAAGCTGAGGTGG<br>GA  | TGTTTTTCTAAATTGTGCCAACCA<br>TT |
| Novel-mir-450   | TGAGTTAAGTTTACATCCAGGCTGACATCCTCTAACATTAGTAAGCTTACTTCTTAATCACACCGTTTCGGTTGTAACAAGCCAGAAT<br>GTCACATCAT    | -18.3      | Novel-mir-450-5p | -                | TTACATCCAGGCTGACATCCT<br>CT   | -                              |
| Novel-mir-451   | AGCAGGATGTTTACTGGAAGTCTGAGCACAGGTATAACAATACAGCGCTGGGATCAAAGAGACAGAGCTCCCGCA                               | -20        | Novel-mir-451-5p | -                | TTACTGGAAGTCTGAGCACAGG<br>TA  | -                              |
| Novel-mir-452   | TTCTGGTGGCTTAGATGTTGGGAGCAGTGGCTGCAGCATGCCAAGTTTCATGTACTTCTCGTACTGGAGT                                    | -20.2      | Novel-mir-452-5p | Novel-mir-452-3p | TTAGATGTTGGGAGCAGTGG<br>C     | CGAAGTTTCATGTACTTCTCGTA        |
| Novel-mir-453   | GACACGTACATTAGTGTACAGGGCAGTGGAAAGTGAATCAAGCAAACAACACATGATACTGTACCTCTGTGTTCTCACTGT<br>AATGTGATATGTG        | -26.7<br>3 | Novel-mir-453-5p | -                | TTAGTGTGTACAGGGCAGTGG<br>G    | -                              |
| Novel-mir-454   | AAAAAGCCGGTTATCAGGTTGGGAGCTGTCGAGCACATAACTGCAGCAGCAGACTGGTCTTGCCTTTAGCATGGCTAGGC                          | -28.9      | Novel-mir-454-5p | -                | TTATCAGGTTGGGAGCTGTCGA<br>GC  | -                              |
| Novel-mir-455   | GTGACTGAACCTTATCGCACACAGCCCACTTAAGCGCCAAAACTCCAGTCTGTGAGCTAGGTATTGTGACTGGGCATGGTTGAGTGA<br>CT             | -20.5      | Novel-mir-455-5p | -                | TTATCGCACACAGCCCACTTAA<br>GC  | -                              |
| Novel-mir-456   | AATCTGGCTTTTATGGAAGAGTGACAAGAAGACCGCATTGTTGAAAGAAAGGAATAAGAGTCTGTTTGCAGTTTGCACACAAGCC<br>ACGTA            | -18.5      | Novel-mir-456-5p | -                | TTATGGAAGAGTGACAAGAAGA<br>A   | -                              |
| Novel-mir-457   | AATCTGGCTTTTATGGAAGAGTGGAAGAAGAAAGCAATAAGAGTCTGTTTGCAGTTTGCACACAAGCCATGTAGGGGACACAG<br>CAA                | -24.5      | Novel-mir-457-5p | -                | TTATGGAAGAGTGGAAGAAGAA<br>A   | -                              |
| Novel-mir-458   | GGTGTCTTGTATGTCAAACTAAACATGTAGCCATTTCAACCTGCTACATGTGCGTAGACGTACACACACGCACCG                               | -23.7      | Novel-mir-458-5p | -                | TTATGTCAAACTAAACATGTA<br>GC   | -                              |
| Novel-mir-459   | GAACAGTAGCTTCAACGTGATCGACAGGCATGAGTGAGACCGATCAGCGTTACCATGTGCGGCTGTGTGGAGTTATTTTAA                         | -22        | Novel-mir-459-5p | -                | TTCAACGTGATCGACAGGCATG<br>AG  | -                              |
| Novel-mir-460   | GTTTTGCTAGTTACACGAATTCCAAACCGGGTGCATGCCAAATTCATATTTCTTTTGGGAGACTGGCTGGTTCTGTTGGACGGG<br>ATTAATATGA        | -22.1      | Novel-mir-460-5p | Novel-mir-460-3p | TTACACGAATTCCAAACCGGG<br>TGC  | TGGCTGGTTCTGTTGGACGGG          |
| Novel-mir-461-1 | TGTCACAGACTTCCAACCTCACGAACAGGTACACCATAAAATAAGCCAAAGTCCAAGGTGTGCCATGCTCATGGGTAGGACCAGCC<br>ACAGATTATGTGAGA | -25.8      | Novel-mir-461-5p | -                | TTCCAACCTCACGAACAGGTACA<br>CC | -                              |
| Novel-mir-461-2 | CGTCACAGATTTCCAACCTCACGAACAGGTACACCATAAGATAAGACAAAGTCCGAGGTGTGCCATGCTCATGGGTAGGACCAGCC<br>ATAGATTGATGAAA  | -25        | Novel-mir-461-5p | -                | TTCCAACCTCACGAACAGGTACA<br>CC | -                              |
| Novel-mir-462   | CCTCTGGGCTTCTGTCTGTCCCAAGGTGAACGTGTCGATTTGTCTTGGGCGAGGTTGAGGAACGTGAAGCTCGCACCTTCGTG<br>GA                 | -24.9      | Novel-mir-462-5p | -                | TTCTGTCTGTCCCAAGGTGAAC<br>CC  | -                              |
| Novel-mir-463-1 | GTGTGTGCTTTCTAACTCTGTCCAGTCGGCCAGTTTGGCCACAGGTGGATCCAGTCTGGTTCTAGACACACTT                                 | -25.2      | Novel-mir-463-5p | -                | TTCTAACTCTGTCCAGTCGGC<br>CC   | -                              |
| Novel-mir-463-2 | GTGTGTGCTTTCTAACTCTGTCCAGTCGGCCAGTTTGGCCACAGGTGGATCCAGTCTGGTTCTAGACACACTT                                 | -22.4      | Novel-mir-463-5p | -                | TTCTAACTCTGTCCAGTCGGC<br>CC   | -                              |
| Novel-mir-464   | CAGATACTCATTCTGATCCTCGGCCCTCTGTCTGATGTCGTATGCCAGTGTGATACACAGACAGGACAGATGTTGTTATGTTAAA<br>ATAGATTAAGTGA    | -18.5      | Novel-mir-464-5p | -                | TTCTGATCCTCGGCCCTCTGT<br>CG   | -                              |
| Novel-mir-465   | ATGGCAGTCTTCTGTGTTATGGTGAACGATGGTTAGAGTGTACGATCTGCTCAGTGTGTTGCTGATCTGCAGAAGCAACATCATGT<br>CATC            | -24.3      | Novel-mir-465-5p | Novel-mir-465-3p | TTCTGTGTTATGGTGAACGATG<br>GT  | CAGTGTGTTGCTGATCTGCAGAA<br>GC  |
| Novel-mir-466-1 | GCTGAAGCCATTCTGTTGTGGACTGTCTGCTGGTGTGGTTCATTGCTCTGTCATACCCAACTTCTACGATTTTCAGCT                            | -24        | Novel-mir-466-5p | -                | TTCTGTTGTGGACTGTCTGCTGG<br>G  | -                              |
| Novel-mir-466-2 | TCTGAAACCATTCTGTTGTGGACTGTCTGCTGGTGTGGTTCATTGCTCTGTCATACCCAACTTCTACGAGTTTCAGC                             | -24.9      | Novel-mir-466-5p | -                | TTCTGTTGTGGACTGTCTGCTGG<br>G  | -                              |
| Novel-mir-466-3 | TCTGGAGCCATTCTGTTGTGGACTGTCTGCTGGTGTGGTTCATTGCTCTGTCATACCCAACTTCTACGAGTTTCAGC                             | -23.5      | Novel-mir-466-5p | -                | TTCTGTTGTGGACTGTCTGCTGG<br>G  | -                              |
| Novel-mir-467   | TGACCTCTTCTTCTAGGTGCTGGTGGTGGCAGTGGCACTGCCACTGTTTCAGGACTTCAAGTGTCTTCTCCG                                  | -22.9      | Novel-mir-467-5p | -                | TTCTTAGGTGCTGGTGGTGGC<br>G    | -                              |
| Novel-mir-468   | GAGGGTCTTCTTCTGGAAGTGGTCTCAAGCTGCATCACCTCATGTTGGTATTGACCTTCTCACTGTGCTCCTCTGTGAT                           | -22.3      | Novel-mir-468-5p | Novel-mir-468-3p | TTCTTGAAGTGGTCTCAAGCT<br>GC   | TTGGTATTGACCTTCTCACTGTG<br>TC  |
| Novel-mir-469-1 | GGGGCGACCGTCTTTTGTGTGATGGCCCGAGCTTTGGAACCTCTACCGCAAGAGTTACAGTGCATAACCG                                    | -18.4      | Novel-mir-469-5p | -                | TTCTTTTGTGTGATGGCC<br>C       | -                              |

|                 |                                                                                          |            |                  |                  |                        |                            |
|-----------------|------------------------------------------------------------------------------------------|------------|------------------|------------------|------------------------|----------------------------|
| Novel-mir-469-2 | GGGGCGACCGTCTTTTCTGTGTATGGCCCCAGACTTTGGAACCTCTACCGCCAAGAGTTACGGTGCATA                    | -22.3      | Novel-mir-469-5p | -                | TTCTTTTGCTGTGTATGGCCC  | -                          |
| Novel-mir-469-3 | GGGGCGACTGTCTTTTCTGTGTATGGCCCCAGACTTTGGAACCTCTACCGCCAAGAGATACGGTGCCTAACCA                | -24.2      | Novel-mir-469-5p | -                | TTCTTTTGCTGTGTATGGCCC  | -                          |
| Novel-mir-470   | CCAGTCTCTTTGAAGATCTCTGTACAAAGTCCCGAGTACACAGACGCCTCTGAGACATCCAGACCATGCTGCTCCAGGCTCTCTTG   | -22.1      | Novel-mir-470-5p | -                | TTGAAGATCTCTGTACAAAGTC | -                          |
| Novel-mir-471   | CAGTGATCTATTGAAGATCTGTGTGAAGATGGGGCCAGCTGATCAGGACAGGTTTTGGCCCGAGGGGGTCACAC               | -24.1      | Novel-mir-471-5p | -                | TTGAAGATCTGTGAAGATGG   | -                          |
| Novel-mir-472-1 | CAGTAACCTGTTGAAGATGAATGTGAAGATGGGGCCAGCTGATCAGCACACACTTTCAGGCAGGAGGGGG                   | -19.5      | Novel-mir-472-5p | -                | TTGAAGATGAATGTGAAGATGG | -                          |
| Novel-mir-472-2 | CAGTGACCTGTTGAAGATGAATGTGAAGATGGGGCCAGCTGATCAGCACACACTTTCAGGCAGGAGGTGCACACC              | -22        | Novel-mir-472-5p | Novel-mir-472-3p | TTGAAGATGAATGTGAAGATGG | GATCAGCACACACTTTCAGGCAGGAG |
| Novel-mir-472-3 | CAGTGACCTGTTGAAGATGAATGTGAAGATGGGGCCAGCTGATCAGCGCACACTTTCAGGCAGGAGGTGCACACC              | -21.6      | Novel-mir-472-5p | Novel-mir-472-3p | TTGAAGATGAATGTGAAGATGG | TCAGCGCACACTTTCAGGCAGGA    |
| Novel-mir-473   | AGGGATAAGCTTGAAGTATCTTGAAGGCCGGTCTGCTCCTTAATGGCATCAGAGTCAATGAAGGCCGCTTGTCTTGAATTCAA      | -26.7      | Novel-mir-473-5p | -                | TTGAAGTATCTTGAAGGCCGG  | -                          |
| Novel-mir-474   | ATCTGCAAACCTTGACAATGTGGTTGGGGCTGTAGTTGGCACACAGTCTAGTGCAGTGAAGAGCAATGGGCTGAGCACAC         | -29.3      | Novel-mir-474-5p | -                | TTGACAATGTGGTTGGGGCTGT | -                          |
| Novel-mir-475   | CTGCTTGCCCTTGAGAAATGGTAAATGAGCCTTTGAAGAGAGAATCGCTCTGTTCTTTGAAATGCCACACCTCGCTTATTTCAACG   | -20.7      | Novel-mir-475-5p | -                | TTGAGAAATGGTAAATGTAGC  | -                          |
| Novel-mir-476-1 | CCTGTGCTTCTTGAGTAAGTTGGTACTGAGGCCACACCTCACCCCTCTGAGCTCTGGGTATACACT                       | -18        | Novel-mir-476-5p | -                | TTGAGTAAGTTGGTACTGAGG  | -                          |
| Novel-mir-476-2 | CCTGTGCTTCTTGAGTAAGTTGGTACTGAGGCCACACCTCACCCCTCTGAGCTCTGGGTATACACTTGAGGT                 | -22.6      | Novel-mir-476-5p | -                | TTGAGTAAGTTGGTACTGAGG  | -                          |
| Novel-mir-476-3 | TCTCTGTTCCCTTGAGTAAGTTGGTACTGAGGCCACACCTCACCCCTCTGAGCTCTGGGTATACACTTGAGGT                | -20.5      | Novel-mir-476-5p | -                | TTGAGTAAGTTGGTACTGAGG  | -                          |
| Novel-mir-477   | CTCAGTCCCTTTGATGGTCAGAGGCAGAGGAGAGGGGTTCTTCTGAAAGTGTGCTATTATTTTTTTGCTTGTATTATTTGAG       | -22.4      | Novel-mir-477-5p | -                | TTGATGGTCAGAGGCAGCAGA  | -                          |
| Novel-mir-478   | CTCCGTCCCTTTGATGGTCAGAGGTAGCAGAGGGAAGGGGTTCTTCTGACATCTACTGTTATTTCTGTTGCTTGTATTATTTGAGG   | -29.7<br>4 | Novel-mir-478-5p | -                | TTGATGGTCAGAGGTAGCAGA  | -                          |
| Novel-mir-479   | GATGCAGCAGTTGATGTTGACTTTAAGCTGGACTGTGAAGATCTACTGGATTTTTTTGATGTCTGTGATCTAGCATCACTTGCTCCAA | -23.5      | Novel-mir-479-5p | -                | TTGATGTTGACTTTAAGCTGGA | -                          |
| Novel-mir-480-1 | ACTTGCTGTTTTGCTATTTGCTGTGGACATCTGAGATAAAGAAATCTCTGAAGGTGTAAGTCAGTAAATCTAAAATGTATAT       | -19        | Novel-mir-480-5p | -                | TTGCTATTTGCTGTGGACATCT | -                          |
| Novel-mir-480-2 | ACTTGCTGTTTTGCTATTTGCTGTGGACATCTGAGATAAAGAAATCTCTGAAGGTGTAAGTCAGTAAATCTAAAATGTATAT       | -19        | Novel-mir-480-5p | -                | TTGCTATTTGCTGTGGACATCT | -                          |
| Novel-mir-481   | CGCAGGCAGCTTGAAGATGAAAGACCTGGACCAAGAAACCTAGATAATTTAATCATTCTGGGCTAACCCCATACTACGCAGGC      | -19.2<br>1 | Novel-mir-481-5p | -                | TTGAAAAGATGAAAGACCTGG  | -                          |
| Novel-mir-482   | CTAAGAGGATTTGAAAGTCGCCAGATTTAGCGAGAAAGTCGCCAAGTTGGCAACACTGCCACAGTTCATGGGT                | -19.2      | Novel-mir-482-5p | -                | TTGAAAAGTCGCCAGATTTAGC | -                          |
| Novel-mir-483-1 | CTGGTGCATGTTGAAAGTCAATCTGGAATCGTGGTCTCCATTTCTTGGTCCGTCGCATCAGATCTCAGATGATTCAGTCACACAGCA  | -26.2      | Novel-mir-483-5p | Novel-mir-483-3p | TTGAAAGTCAATCTGGAATCGT | TCTCAGATGATTCAGTCACACAGCAG |
| Novel-mir-483-2 | GACTCGCATGTTGAAAGTCAATCTGGAATCGTGGTCTCCATTTCTTGGTCCGTCGCATCAGATCTCAGATGATTCAGTCACACAGCA  | -22.5      | Novel-mir-483-5p | Novel-mir-483-3p | TTGAAAGTCAATCTGGAATCGT | TCTCAGATGATTCAGTCACACAGCAG |
| Novel-mir-484   | TAGAAAGGTGTTGGACATACTAATAGAAACGGGGACTAATCTTCTGTCTCTTCTTGTGTCAGTCTGAGTAT                  | -27.6      | Novel-mir-484-5p | -                | TTGGACATACTAATAGAAACGG | -                          |
| Novel-mir-485   | GCCAAACAGCATTGGACATCAATAAAGGCACATAAACTCTCATTTAGTAGGGCAGTTCCTGATGATTTTTTTGTTGATGCCACAAAA  | -23        | Novel-mir-485-5p | -                | TTGGACATCAATAAAGGCACAT | -                          |
| Novel-mir-486   | CCGGTTCCTTTTGACCTCAATCTAAGGCGGGGATCTACGTGTGCTTGGACGTGACGGACGAGGAAGTGT                    | -27.3      | Novel-mir-486-5p | Novel-mir-486-3p | TTGGACCTCAATCTAAGGGCG  | TGTGCTTGGACGTGACGGACGAG    |
| Novel-mir-487   | CAGTGACATGTTGGAGATAAGTGTGAAGATGGGGCCAGCTGATCAGCACACACTTTCAGGCAGGAGGGGGTTCATGC            | -20.9      | Novel-mir-487-5p | -                | TTGGAGATAAGTGTGAAGATGG | -                          |
| Novel-mir-488   | GTAAAAAAGTGGAGTATATTTGATAGCGGCCAATTTTGATATGCAAAATCAGGGCCATGGTTAAACCACCTTTTTTACC          | -23.1      | Novel-mir-488-5p | -                | TTGGAGTATATTTGATAGCGG  | -                          |
| Novel-mir-489   | TATCTGATTTTGGATTGCATCTGGAGCAGGTTTATTGAGTGAAGTGTGTTAACATTTGTTCCATGTATCTGTGTTTGTGCTGATAC   | -20.7      | Novel-mir-489-5p | -                | TTGGATTGCATCTGGAGCAG   | -                          |

|                 |                                                                                        |       |                  |                  |                         |                         |
|-----------------|----------------------------------------------------------------------------------------|-------|------------------|------------------|-------------------------|-------------------------|
| Novel-mir-490   | GACAGTGTGCTTGGGTGCAGGGAGAAGATGTGGGGAGATCTTAAACACTCATCTATCCACTGCACTCTGACTTTCTGTCT       | -30.2 | Novel-mir-490-5p | -                | TTGGGTGCAGGGAGAAGATG    | -                       |
| Novel-mir-491   | AGATGCTCAATTGGGTTAAGTCGGGGCTCTGGCTGGGCCATTCAAGAACAGTCACAGAGTTGTTGTAAGCCACTCCTTCGTTA    | -20   | Novel-mir-491-5p | -                | TTGGGTTAAGTCGGGGCTCTG   | -                       |
| Novel-mir-492   | CCAGTTGTGTTTGGTGATTTTTCTGTAGACCACACTGCTACGGCAGTGCCTGTTCTTGGTGTCACTGTTGAGAGATGCTCATCAC  | -23.5 | Novel-mir-492-5p | Novel-mir-492-3p | TTGGTGATTTTTCTGTAGACC   | TCTGTTGAGAGATGCTCATC    |
| Novel-mir-493   | TATAGTCCCTTGGTGTGAGAGGCAGAGAGGGAGGGTCTTTCTGAAGTCTATTATTATTTCTTTTGTCTTTGTTATGTTGAGG     | -18.9 | Novel-mir-493-5p | -                | TTGGTGTGAGAGGCAGCAGAG   | -                       |
| Novel-mir-494   | CACCTGCGGTTGTAATGCTCTGCAGAGAGGGCAGTGGAGTCTGCTGCTCCGCAACCACTGCGGGTGTGCCGGGG             | -38.8 | Novel-mir-494-5p | -                | TTGTAATGCTCTGCAGAGAGG   | -                       |
| Novel-mir-495-1 | GAGGTGGAGGTTGTAGAGCTGGTGGCAGAGCTTGCTTAGTTTCTGCCCTGCTCCGCAACCACTGCGGGTGTGCCGGGG         | -34.8 | Novel-mir-495-5p | -                | TTGTAGAGCTGGTGGCAGAGC   | -                       |
| Novel-mir-495-2 | GAGTTGGAGGTTGTAGAGCTGGTGGCAGAGCTTGCTAAGCTTCTGCCAGCTCCGCAACATCATCG                      | -37.4 | Novel-mir-495-5p | -                | TTGTAGAGCTGGTGGCAGAGC   | -                       |
| Novel-mir-496   | CAGTGACCTGTTGTAGATAAGTGTGAAGATGGGGCCAGCTGATCAGCACAGACTTTCAGACAGGAGGGGTCG               | -18.4 | Novel-mir-496-5p | -                | TTGTAGATAAGTGTGAAGATGG  | -                       |
| Novel-mir-497   | ACAGGCTCCATTGTAGGACCTCTGGGGTAGACGGGGCTTCTCAGTCTAGCCAGAAGCTAGGGGACCCGGGAGGAACGCAGAGG    | -41.4 | Novel-mir-497-5p | -                | TTGTAGGACCTCTGGGGTAGAC  | -                       |
| Novel-mir-498-1 | CATATCTCATTGTATTGTGTGGCATTATGCAAGTAAGATTACATTGCTCCTAACTGTGCACATGATCTGTATAATATTTAGAGGC  | -23.2 | Novel-mir-498-5p | -                | TTGTATTGTGGCATTATGCA    | -                       |
| Novel-mir-498-2 | TATATGTCATTGTATTGTGTGGCATTATGCAAGTAAGATTACATTGCTCCTAACTGTGCACATGATCTGTATAATATTTAGAGGT  | -23.2 | Novel-mir-498-5p | -                | TTGTATTGTGGCATTATGCA    | -                       |
| Novel-mir-498-3 | TATATTTCACTTTGATTGTGTGGCATTATGCAAGTAAGATTACATTGCTCCTAACTGTGCACATGATCTGTATAATATTTAGAGGT | -21.5 | Novel-mir-498-5p | -                | TTGTATTGTGGCATTATGCA    | -                       |
| Novel-mir-498-4 | TATATTTCACTTTGATTGTGTGGCATTATGCAAGTAAGATTACATTGCTCCTAACTGTGCACATGATCTGTATAATATTTAGAGGC | -20.6 | Novel-mir-498-5p | -                | TTGTATTGTGGCATTATGCA    | -                       |
| Novel-mir-498-5 | TATATTTCACTTTGATTGTGTGGCATTATGCAAGTAAGATTACATTGCTCCTAACTGTGCACATGATCTGTATAATATTTAGAGGT | -23.9 | Novel-mir-498-5p | -                | TTGTATTGTGGCATTATGCA    | -                       |
| Novel-mir-498-6 | TATATTTATTTGATTGTGTGGCATTATGCAAGTAAGATTACATTTCTAACTGTGCACATGATCTGTATAATATTTAGAGGT      | -18.2 | Novel-mir-498-5p | -                | TTGTATTGTGGCATTATGCA    | -                       |
| Novel-mir-499   | TTCCAGTTTTTGTAATGAAGAATGCTGTGTGGACATTCTGTTGGAGGTGCAGCTGCAATTTACAGACCTGGAGAA            | -26   | Novel-mir-499-5p | -                | TTGTGAATGAAGAATGCTGTGT  | -                       |
| Novel-mir-500   | AGCCACTCCTTTGTTATCTTGCTGTGGTCTTAGGGTCACTGCTGTTGAAAGATAAACTGTCGCCACAGCTGAGGTCCAGAGTG    | -27   | Novel-mir-500-5p | -                | TTGTTATCTTGCTGTGGTCTT   | -                       |
| Novel-mir-501   | TACAGTACGGTTGTTATTACAGTCGGCGCTAATGACTCCCGACTTCGCCAGTCCGAGGTCCTAAGATTAATGTTGAGTCAGTGTGT | -27.4 | Novel-mir-501-5p | Novel-mir-501-3p | TTGTTATTCAGTCGGCGCTAA   | TTAATGTTGAGTCAGTGTGTAAT |
| Novel-mir-502   | CTTATGACCTTTGTTGAACCTATAGCCAGGCATCTCAAGGATCAGGCTGCTGTGGTGTATATCAGCTTGTGGTCTCAGT        | -19   | Novel-mir-502-5p | -                | TTGTTGAACCTATAGCCAGGC   | -                       |
| Novel-mir-503   | TGGCATTGCATTGTTGTTCATTGTGCCAGGTTGACCTGTAATAATGACATGAAGTGTGGACTGGAATGTTGACAGTATGGACCTA  | -22.3 | Novel-mir-503-5p | -                | TTGTTGTGTTTATTGTGCCAGG  | -                       |
| Novel-mir-504   | CAGTTCATGTTTGTACTGCTTAGGCGGTGTGTCTGCCGCATGTATGTTGCTGGTTAACAAGCAGATTATAATCCATGA         | -25.5 | Novel-mir-504-5p | -                | TTGTTTGTACTGCTTAGGCGG   | -                       |
| Novel-mir-505   | GTATGGTACATTTACGTAAGTGGGAAACAGTGGGGCGTGGCTCGCTCTGCAGATTGGCCGACTGTAACCTGGCGTTATGAACCTGA | -27.1 | Novel-mir-505-5p | -                | TTTACGTAAGTGGGAAACAGTGG | -                       |
| Novel-mir-506   | GATTCAGCCCTTAGTTTCACTTTCCATCTGTGGCGCTGAGTCCCGGTTGCTGCTCATCCACGATGGCTCTGTTGCTAGGGAGAC   | -26.3 | Novel-mir-506-5p | -                | TTTATTCAGCTTTCCATCTGTG  | -                       |
| Novel-mir-507   | CAGAATCTGCTTTATTGGCCAGGTGTGTGGGACACAGGAAATTTGACTCTGGTACATCGGCTCTTAATGTGCATGTACAT       | -20.1 | Novel-mir-507-5p | -                | TTTATTGGCCAGGTGTGTGGG   | -                       |
| Novel-mir-508   | CAGAATCTGCTTTATTGGCCAGGTGTGTGGACACATGAGAAATTTGACTCTGGTACTGTACATCGGCTGCTCAATGTGCAACAGTA | -21.5 | Novel-mir-508-5p | -                | TTTATTGGCCAGGTGTGTGGG   | -                       |
| Novel-mir-509-1 | GGGGATAAGTTTCATGTCATACTGAGGAACCCCTGCTTAGGCTGTTTTAATGTGGGGTGGTGGTGAAGTTTATATGGGCAC      | -31.3 | Novel-mir-509-5p | Novel-mir-509-3p | TTTCATGTCATACTGAGGAAC   | TGAGTTGTTATATGGGCACTGAG |
| Novel-mir-509-2 | GGGGATAAGTTTCATGTCATACTGAGGAACCCCTGCTTAGGCTGTTTTAATGTGGGGTGGTGGTGAAGTTTATATGGGCAC      | -31.3 | Novel-mir-509-5p | Novel-mir-509-3p | TTTCATGTCATACTGAGGAAC   | TGAGTTGTTATATGGGCACTGAG |
| Novel-mir-510-1 | AAGCAGCACTTTCTGATTGGGCTTGGTGGTGAATCCGTACAACCCGGCTGGCTGTGTGAAGGGAGGTGGTGTGTTA           | -25.4 | Novel-mir-510-5p | -                | TTTCTGATTGGGCTTGGTGGT   | -                       |

|                   |                                                                                         |       |                  |                   |                        |                           |
|-------------------|-----------------------------------------------------------------------------------------|-------|------------------|-------------------|------------------------|---------------------------|
| Novel-mir-510-2   | AAGCCGCACTTTCTGATTGGGCTTGTGCTGGGTGAATCCATACCAACCAGCTGGCTGTTGAGAAGGGAGGTGATGTTTA         | -26.8 | Novel-mir-510-5p | -                 | TTTCTGATTGGGCTTGTGCTT  | -                         |
| Novel-mir-508-1   | CTGTGGCCCTTTGAAGATGTCCAGTCTGTGGCCTCTAGACAGCCCGCAGGCAGCTTGCACAGTCGTTCCAGG                | -22.7 | Novel-mir-508-3p | -                 | TTTGAAGATGTCCAGTCTGTG  | -                         |
| Novel-mir-508-2   | CTGTGGCCCTTTGAAGATGTCCAGTCTGTGGCCTCTAGACAGCCCTACAGGCTGGCCTGTCGTTCCAGGTGTTAACAGT         | -28.5 | Novel-mir-508-3p | -                 | TTTGAAGATGTCCAGTCTGTG  | -                         |
| Novel-mir-508-3   | CTGTGGCCCTTTGAAGATGTCCAGTCTGTGGCCTCTAGACAGCCCTGACAGGCTGGCCTATGCACAGTGTTCAGT             | -26.5 | Novel-mir-508-3p | -                 | TTTGAAGATGTCCAGTCTGTG  | -                         |
| Novel-mir-511     | CTCAACCACTTTGAGAAGTAGTCAGTGGCTGTCAAAATATACTGAAAGCCATCAGCAGTTTTGGGTAAGGG                 | -18.1 | Novel-mir-511-5p | -                 | TTTGAGAAGTAGTCAGTGGCTG | -                         |
| Novel-mir-512     | GGAGCGGAGATTGTAGTGGATAGATGGGAGTGCCTGCTCGTTGCCACGGCAACATTTCTCCGGTCCC                     | -27.3 | Novel-mir-512-5p | -                 | TTTGCTAGGTGGATAGATGGG  | -                         |
| Novel-mir-513     | GGAGCGAATATTGCTAGTGGATGGACGGGAGTGGAGTCCAGGTCCTCTCTCTGCTAGCCTTACTAAGCGCCCA               | -24.6 | Novel-mir-513-5p | -                 | TTTGCTAGGTGGATGGACGGG  | -                         |
| Novel-mir-514     | ATGGCGAAGATTGGACCAAAAGGAGACTGTTATAGATATATTCATGTCTTTTATGTTTTCCTGAGTCACACAAGATTTGACCAA    | -19.7 | Novel-mir-514-5p | -                 | TTTGACCAAAAGGAGACTGTTA | -                         |
| Novel-mir-515-1   | CCTGTGACGATTTGGATTAAGTGGAGACTTTTTAGGGAACTTTTGGGACATCCTGATAGTAAAGAGTTACAGTAGTCCAGCCTGGAA | -26.6 | Novel-mir-515-5p | -                 | TTTGATTAACTGGAGACTTTTT | -                         |
| Novel-mir-515-2   | GCTGCAGCAATTTGGATTAAGTGGAGACTTTTTAGGGAATTTAGGACATCCTGATAGTAAAGAGTTACAGTAGTCCAGCCTGGAA   | -27.9 | Novel-mir-515-5p | -                 | TTTGATTAACTGGAGACTTTTT | -                         |
| Novel-mir-516     | GATGAAGCTGTTTGAAGTCTGGTGGAGTGGGCTGAAGACTCCAGTACCTTCCCTCCGAGGAGGAGTCTGAAGTGGGA           | -20.5 | Novel-mir-516-5p | Novel-mir-516-3p  | TTTGAAGTCTGGTGGAGTGGG  | TACCTTCTCCCTGAAGGCAGGAGTC |
| Novel-mir-517     | TCTGGACATCTTTGTTGGTAGGTTTGTGCGGAAATATTCTGTGATCACTTCTCTAGATTCTCCATGGCAAGCTCCAGGAGACGTG   | -24   | Novel-mir-517-5p | -                 | TTTGTGGTAGGTTTGTGCGG   | -                         |
| Novel-mir-518     | ATCCACTCTCTTTTGAAGATCTCTGTACAAAGTCCCGAGTACACAGACGCCCTCTGAGACATCAGACCATGCTGCTCCAGGCTTCT  | -22.1 | Novel-mir-518-5p | -                 | TTTTGAAGTCTCTGTACAAAGT | -                         |
| Novel-mir-519     | TGTTTCAAACCTTTGAGTGCACGCAATGCGGCATCCACACAATTTGAGTGAATGCAATGCGATGCTCTCCCAAGTGGGTGCGGT    | -24.7 | Novel-mir-519-5p | Novel-mir-519-3p  | TTTTGAGTGCACGCAATGCGG  | TGCAATGCGATGCTCTCCCAAGT   |
| Novel-mir-520-1   | GTGCTGCAGTTTTGGTTTGTGCACCATGCTTGTAGTGTAAATAACAGACTACTGGAGGAGATGAGCTGAAGGCTGAATCAGT      | -31.8 | Novel-mir-520-5p | -                 | TTTTGGTTTGTGCACCATGTCT | -                         |
| Novel-mir-520-2   | GTGCTGCAGTTTTGGTTTGTGCACCATGCTTGTAGTGTAAATAACAGACTACTGGAGGAGATGAGCTGAAGGCTGAATCAGT      | -35   | Novel-mir-520-5p | -                 | TTTTGGTTTGTGCACCATGTCT | -                         |
| Novel-mir-521     | GAATGCCTGTTTTTGTTCACAGTGCCTACCAGGCTGATGTTCTTACTAGGTGTTTATGAACAAGGGGAGCGATGTA            | -20.3 | Novel-mir-521-5p | Novel-mir-521-3p  | TTTTGTTACAGTGCCTACCAG  | TACTAGGTGTTTATGAACAAGGGG  |
| Novel-mir-522     | AAGTTTCTGTTTTTTCAGTACAGGCTGTAGGGGGTCCCAAAATAGAGAAGTGAAGAAGGGTGGGGGCC                    | -18.1 | Novel-mir-522-5p | -                 | TTTTTCAGTACAGGCTGTAGG  | -                         |
| Novel-mir-104-2   | CCATATATCCCACTCGTCACCCAGATACACATCCAACAATGGCGGTGTTGTCGAAGAACTTTGTAGATGACAGTGGTGGGAGT     | -23.2 | 2                | Novel-mir-1042-3p | -                      | TTTTGTAGATGACAGTGGTGGG    |
| Novel-mir-104-1-1 | AGGAAAGACAGTTTACAGTGTCTTCAATAAAAGTCTAAACCAAGAAGATTGACCAGGTTTTGCTGAAGGGACCTGTTAGCT       | -23.3 | -                | Novel-mir-1041-3p | -                      | TTTTGCTGAAGGGACCTGTTAGC   |
| Novel-mir-104-1-2 | GTGCTGCAGTTTACAGTGTCTTCAATAAAAGTCTAAATCGAAGAAGATTGACCAGCTTTTGTGCTGAAGGGACCTGTTAGCTAT    | -20.7 | -                | Novel-mir-1041-3p | -                      | TTTTGCTGAAGGGACCTGTTAGC   |
| Novel-mir-104-1-3 | GTGCTGCAGTTTACAGTGTCTTCAATAAAAGTCTAAACCAAGAAGATTGACCAGGTTTTGCTGAAGGGACCTGTTAGCTAT       | -22.2 | -                | Novel-mir-1041-3p | -                      | TTTTGCTGAAGGGACCTGTTAGC   |
| Novel-mir-104-1-4 | GTGCTGCAGTTTACAGTGTCTTCAATAAAAGTCTAAATCAAAAAGATTGACCAGGTTTTGCTGAAGGGACCTGTTAGCTAT       | -24.6 | -                | Novel-mir-1041-3p | -                      | TTTTGCTGAAGGGACCTGTTAGC   |
| Novel-mir-104-1-5 | GTGCTGCAGTTTACAGTGTCTTCAATAAAAGTCTAAATCAAAAAGATTGACCAGGTTTTGCTGAAGGGACCTGTTAGCTAT       | -24.6 | -                | Novel-mir-1041-3p | -                      | TTTTGCTGAAGGGACCTGTTAGC   |
| Novel-mir-104-0   | TGGCATGTGGGACACAGTTTTCTTAATACATAGAGATGCTGCAAAATTTACAGTGGGAGATGGACGCCCACTCCT             | -22.2 | -                | Novel-mir-1040-3p | -                      | TTTTCAGTAGGAGATGGCAGC     |
| Novel-mir-103-9   | GCCGGCTCTGGTGAAGCCGACTGGGTTAGTAGGGCGAAGTTTTAGATAGTGTTCACCAAGGAGGCTCTGAGAAAGAGTAATC      | -23.2 | -                | Novel-mir-1039-3p | -                      | TTTTACCAAGGAGGCTCTGAGA    |
| Novel-mir-103-8   | AAAGTCTAGTGTGGAGGCTGCTCATGTCACAAAAATACACGACTTTGGTCTAGGATCATTTTGTGACTAGGACGGCATCTGTG     | -24.1 | -                | Novel-mir-1038-3p | -                      | TTTGTGACTAGGACGGCATCT     |
| Novel-mir-103-5   | GTCCCTGGGCTGCTCAGGTTGGAGCTGTGTGTGTCGGTCCAGGCAGACTTTGTCCGGATGTTGGAGCCCAACCCAGGCT         | -33.9 | -                | Novel-mir-1035-3p | -                      | TTTGTCCGGATGTTGGAGCCCA    |

|                  |                                                                                           |            |   |                   |   |                         |
|------------------|-------------------------------------------------------------------------------------------|------------|---|-------------------|---|-------------------------|
| Novel-mir-516-2  | ACAGTGTTCAGCATCCTCACAGCCTGGTGGATGAAGCTGTTTGAAGTCTGGTGGAGTGGGTCTGAAGACTCC                  | -20.2      | - | Novel-mir-516-5p  | - | TTTGAAGTCTGGTGGAGTGGGT  |
| Novel-mir-1034   | ACAGTGTTCAGCATCCTCACAGCCTGGTGGATGAAGCTGTTTGAAGTCTGATGGAGTGGCCCTGAAGGCAGG                  | -19.3      | - | Novel-mir-1034-3p | - | TTTGAAGTCTGATGGAGTGGCC  |
| Novel-mir-1031   | GCACCTGTGCGAGCGGGTCTATGTCAGGGTAGTAGCGGCCAGTCGAGATTTGGATATGTGAGACCTGTGCACAACCTCGAAC        | -24.1      | - | Novel-mir-1031-3p | - | TTTGGATATGTGAGACCTGTGCA |
| Novel-mir-1030-1 | ATGTAATCACTCACAGTCTCTGCATATTTCATGGATATTTGTCTGCAGCCTCTTTGAAGATGTTCCAGTCTGTGGCCTCTAGACAG    | -18.2<br>2 | - | Novel-mir-1030-3p | - | TTTGAAGATGTTCCAGTCTGTGG |
| Novel-mir-1030-2 | CAGTCACTCACAGTCTCTGCATATTTCATGGATGTTGGCTGTGGCCCTTTGAAGATGTTCCAGTCTGTGGCCTCTAGACAG         | -20.9      | - | Novel-mir-1030-3p | - | TTTGAAGATGTTCCAGTCTGTGG |
| Novel-mir-1030-3 | CCAGCTGATGTAATCAATCACAGTCTCTGCATATTTCATGGCTGTCTATGGCCCTTTGAAGATGTTCCAGTCTGTGGCCTTTAGG     | -24.7      | - | Novel-mir-1030-3p | - | TTTGAAGATGTTCCAGTCTGTGG |
| Novel-mir-1030-4 | GCTGATGTAGTCACTCACAGCCTCTGCATATTTCATGAATGTCGTCTGTGGCCCTTTGAAGATGTTCCAGTCTGTGGCCTCTAGACA   | -19.7      | - | Novel-mir-1030-3p | - | TTTGAAGATGTTCCAGTCTGTGG |
| Novel-mir-510-2  | ACAGTGTAAATAGTAGTATGCCAACCCCTCTCAACAGTGTCTCAGAGAAGCAGTGTCTTTCTGATTGGCTTGTGCTGGTGAATTC     | -26.2<br>9 | - | Novel-mir-510-5p  | - | TTTCTGATTGGCTTGTGCTGG   |
| Novel-mir-1029   | AACGTTGTTCTAGTGCATAAAACCAACCGTGTGTGCTGTCTCGATACACGCCCTACTTTCGTGACACTAGACAGCCAGCGAACAAA    | -20        | - | Novel-mir-1029-3p | - | TTTCGTGACACTAGACAGCCAGC |
| Novel-mir-1028   | AAGGTACTCTCTGCAGTACTTTCCTGAAGGTACTACTATTACAGTACTTTCCTGAAGATACTGTAGCTTAACTACTT             | -28.3      | - | Novel-mir-1028-3p | - | TTTCACTGAAGATACTGTAGC   |
| Novel-mir-1027   | ACCTGTGTACCACACCTATTGCTCCTGGTGGCATGTTGGGCAGAGATTTCAAACAGGATTGTAGATGGATGACAAATTG           | -18.2      | - | Novel-mir-1027-3p | - | TTTCAAACAGGATTGTAGATGGA |
| Novel-mir-1026   | AGCACTGATTTTGTCTAAAGGTAGTAAGTCTATTGTTGGGGTAGAGTGGCTGAACACTTTAGTTCTGCTCTGGGATACAGAT        | -28.4      | - | Novel-mir-1026-3p | - | TTTAGTTCTGCTCTGGGATACA  |
| Novel-mir-1024   | TTATCAGGAAATATTAGCCAAATCCAGGCCCTCTGGAGGACAACATCAGCAGCCTGATGAATTTAGAGCTAGATCAGGACTTGGG     | -20.3      | - | Novel-mir-1024-3p | - | TTTAGAGCTAGATCAGGACTTGG |
| Novel-mir-1022-1 | AGGGCAGGAGGGGCAAAGAGAAGCAGAGGGAGAAGAGAGGGGATACTGCTTGGGTTTGTGTTTATTCTCACTTTGCCCTTAACG      | -33.4      | - | Novel-mir-1022-3p | - | TTGTTTGATTCTCACTTTGCCCT |
| Novel-mir-1022-2 | AGGGCAGGAGGGGTAAGAGGAAGGATACTGCTTGTGTTGTTTGTGTTTATTCTCACTTTGCCCTTACAGTCAAC                | -23.3      | - | Novel-mir-1022-3p | - | TTGTTTGATTCTCACTTTGCCCT |
| Novel-mir-1022-3 | CAGGGCAGGAGGGGCAAAGAGGAGCAGAGGGAGAAGAGGAGGGGATACTGTTTGTGTTTGTGTTTATTCTCACTTTGCCCTTAATG    | -32.4      | - | Novel-mir-1022-3p | - | TTGTTTGATTCTCACTTTGCCCT |
| Novel-mir-1022-4 | GAGACGGGGCAGAAGGGCAAAGAGAGAGGATGGGATACTGCTCATGTTTGTGTTTGTGTTTATTCTCACTTTGCCCTTAACGGTCAA   | -28.7      | - | Novel-mir-1022-3p | - | TTGTTTGATTCTCACTTTGCCCT |
| Novel-mir-1022-5 | GGACAGGAGGGCAAAGAGGAGTGGAGGGAGGAGTGGAGGGAGAAGTGGAGGGGACGCTGCTTGTGTTTGTGTTTATTCTCACTT      | -33        | - | Novel-mir-1022-3p | - | TTGTTTGATTCTCACTTTGCCCT |
| Novel-mir-1022-6 | TTTCATAAACAGGGCAGGAGGGAGAAGAGGAGGAATACTGCTCGAGTTTGTGTTTGTGTTTATTCTCACTTTGCCCTTACAGTCAA    | -22.3      | - | Novel-mir-1022-3p | - | TTGTTTGATTCTCACTTTGCCCT |
| Novel-mir-1020   | CTACCAAAGCATCCCTTGTCTCATTAGATGGTGACAGACAGTGTGAGCTCACACTGTTGAATTTGAATTTGTTTGAAGTTGATCAAGG  | -25.7      | - | Novel-mir-1020-3p | - | TTGTTTGAAGTTGATCAAGGT   |
| Novel-mir-1019-1 | ACGGTACATGGGTTGCGAATCAAAAACCGCTGGAGACTGTTGAGATAGTTGTCATGTTCCACCATATTGTTGATATCTGAGCTCGTGCC | -20.5      | - | Novel-mir-1019-3p | - | TTGTTGATATCTGAGCTCGTGCC |
| Novel-mir-1019-2 | ACGGTACATGGGTTGCGAATCAAAAACCGCTGGAGACTGTTGAGATAGTTGTCATGTTCCACCATATTGTTGATATCTGAGCTCGTGCC | -20.7      | - | Novel-mir-1019-3p | - | TTGTTGATATCTGAGCTCGTGCC |
| Novel-mir-1018   | GACACTTGGCATTAGACAGAGTCAATCTTTGTTTTCATCAGACCAGAGTTTTGTTTCTGCTGCTGAGAGTCTTCAAGTGGCC        | -28.8      | - | Novel-mir-1018-3p | - | TTGTTTCTGCTGCTGAGAGTCC  |
| Novel-mir-1013   | CTTTTGGTGTCTCTGCATCTAATGGCAGCCTCATGTCTGACACATGTAGGATGGCTCATCTCTACATTGTCAAGTCTGGAGCTGTAA   | -29.6      | - | Novel-mir-1013-3p | - | TTGTCAAGTCTGGAGCTGTA    |
| Novel-mir-1005-1 | AGTGCTACAAGTGTGTCTTGGCAGAACCGACAAGCGCTCAGTTGGATTCTAGCAGAGAAAAGGAGGTGTGTGTGCC              | -22        | - | Novel-mir-1005-3p | - | TTGATTCTAGCAGAGAAAAGGAG |
| Novel-mir-1005-2 | GAGTGCTACAAGTGTGTCTTGGCAGAACCGACAAGTGTCTGATTGGATTCTAGCAGAGAAAAGGAGGTGTGTGTGCC             | -21.4      | - | Novel-mir-1005-3p | - | TTGATTCTAGCAGAGAAAAGGAG |
| Novel-mir-1004   | GCCAAGGCCCTTATTAAAGTACCTTGTCTGCCACCATTGCCCTTACAGTTTTGCGGCTTGAATGGAGTATGATGGGTCCAGGAT      | -21.6      | - | Novel-mir-1004-3p | - | TTGGAATGGAGTATGATGGGTCC |
| Novel-mir-1002-1 | ACATTACACGTCCGGATCTCTCCACCATCCACTGCGCGCAGGCAGCTTGGAAAGATGAACAGAGACCCGACCCAGAAACC          | -26.3      | - | Novel-mir-1002-3p | - | TTGGAAGATGAACAGAGACCCG  |

|                      |                                                                                                         |            |   |                       |   |                              |
|----------------------|---------------------------------------------------------------------------------------------------------|------------|---|-----------------------|---|------------------------------|
| Novel-mir-100<br>2-2 | ACATTACACGTTCCGGATCTCTCCACCATCCACCTGCGCGCAGGCAGCTTGAAAGATGAACAGAGACCGGACCCAGAAACC                       | -23.4      | - | Novel-mir-1002<br>-3p | - | TTGGAAAGATGAACAGAGACCGG<br>A |
| Novel-mir-999        | GTGGACGACCAAAATACAGACTACACCATTAGTGTGAATCAGTGCACCATTGCTTGTCACTGTAGCCTATAGCCGGTGCCTT                      | -20        | - | Novel-mir-999-<br>3p  | - | TTGCTTGTCACTGTAGCCTATAGC     |
| Novel-mir-996<br>-1  | ATATTCTGTCCACTGAGCTTCTGAGTCAGGTCCAGGACAACCTCTCATCCCTTGATTTATCTCTGGGGCTCCTCCGTGAGTTC                     | -23.4      | - | Novel-mir-996-<br>3p  | - | TTGATTTATCTCTGGGGCTCCTCC     |
| Novel-mir-996<br>-2  | TGCATGTGATGTTGTGTCCATTAAGTTGCTGAGTCAGGTCTAGGACAACCTCTCATCCCTTGATTTATCTCTGGGGCTCCTCCATCAGG<br>TTTC       | -20.4      | - | Novel-mir-996-<br>3p  | - | TTGATTTATCTCTGGGGCTCCTCC     |
| Novel-mir-992<br>-1  | GTGAAAGTACTGCAATAGTAGTACCCTCAGTGAAAGTACTGCAGACAGTACCTTGTGAGTAAAGTACTGCAGTGGCAGTATCTTCAG                 | -37.1      | - | Novel-mir-992-<br>3p  | - | TTGAGTAAAGTACTGCAGTGGC<br>A  |
| Novel-mir-992<br>-2  | GTGAAAGTACTGCAGTGGCAGTATCTTCAGTAAAGTACTGTAATAATAGTACCTTGTGAGTAAAGTACTGCAGTGGCAGTATCTTCA                 | -38.7      | - | Novel-mir-992-<br>3p  | - | TTGAGTAAAGTACTGCAGTGGC<br>A  |
| Novel-mir-989        | AGCAGGTGGGGAGTTCACACAGCTTCAGTGACCTGTTGAAGATGAGTGTGAAGTGGGGCCAGCTGAT                                     | -19.7      | - | Novel-mir-989-<br>3p  | - | TTGAAGATGAGTGTGAAGTGGG       |
| Novel-mir-988        | CGGCAACAGTAAAAGCAGGTCCACCCAGCATCTGGCCCTAAGAAAGTGGTTTGAAGATCTGAGGGACTTTGTAGATTTGTGCCA                    | -27.5      | - | Novel-mir-988-<br>3p  | - | TTGAAGATCTGAGGGACTTTGT<br>G  |
| Novel-mir-987        | ACCGCTGACTGAGGGAGTTCAACTTGCAGGTGATAGCAAGTACCTTCTTGAGTCTGACACTCCTCCGATAGTGTGA                            | -23.9      | - | Novel-mir-987-<br>3p  | - | TTCTTGAGTCTGACACTCCTCC       |
| Novel-mir-985<br>-1  | AGGTCTGGGCTCTGACTCTCCAAAAGGCAGATTTAGTTTTCTGAAGTCAATCTGTGTGGACTTGCTCTGGTGGTTGGGTC                        | -20.5      | - | Novel-mir-985-<br>3p  | - | TTCTGTGTGGACTTGCTCTGGT       |
| Novel-mir-985<br>-2  | GGGCTCTGACTTGGCCACTCCAAAAGGCAGATTTATTTTTCTGAAGCCATTCTGTGTGGACTTGCTCTGGTATTTGGGTC                        | -19.4      | - | Novel-mir-985-<br>3p  | - | TTCTGTGTGGACTTGCTCTGGT       |
| Novel-mir-983        | TTGACCGGAGTCAGCAGGGTCTATGGTGCCAGTTCTTCTGTTAGATCCGCTCGGACACAGAGGTGAGC                                    | -20.4      | - | Novel-mir-983-<br>3p  | - | TTCTGTTAGATCCGCTCGGACAC      |
| Novel-mir-978        | GGGTGCCGTGAATACAAAAACATGCTGAACTAGGAGCTGGGCGTTTCTAGAGCAGTGGGGAGTTGTGGAAGGGCGAGG                          | -27.5      | - | Novel-mir-978-<br>3p  | - | TTCTAGAGCAGTGGGGAGTTGT<br>G  |
| Novel-mir-977        | GATCATATCCCTGAGAGGTTGAGTGAGATCCACATACCCAGGAATGTGGTTTCTACTGTAGCCTGTGAGTCCCAGGAATGCCA                     | -24.7      | - | Novel-mir-977-<br>3p  | - | TTCTACTGTAGCCTGTGAGTCCC      |
| Novel-mir-976        | TTTCAGACTATGCTGTCCCATCTGATTGAGTTAGCGCTAGTCTGTTAAATGTGGGCTTTAGCATATCTGGGC                                | -22.9      | - | Novel-mir-976-<br>3p  | - | TTGTTAAATGTGGGCTTTAGC        |
| Novel-mir-973        | AGACATACCTGCATTCATGATGTGTGTGACGTCTCCTGATTTCTGCTGACAGTTCCTGTGCTGGATTTCATTTTGTATGTT                       | -19.9<br>2 | - | Novel-mir-973-<br>3p  | - | TTCTGTGCTGTGGATTTTCAT        |
| Novel-mir-968        | CTCCTTTGCCATATAGGCTTCCCTTGGGAATGAGCCAGGAGGGGGCAGTGTATAGTGGTTTTCATGTGGAGTAGAAGATTGGG<br>GGTAAGTGGT       | -24.7      | - | Novel-mir-968-<br>3p  | - | TTCATGTGGAGTAGAAGATTGGG<br>G |
| Novel-mir-967        | GGGTGGGGGGTGTGAGTGTCAAACCTGCAGTAGAATATATTCAGGCTTGTGCCAGTTGACGGTCTCCTCAG                                 | -28.3      | - | Novel-mir-967-<br>3p  | - | TTCAGGCTTGTGCCAGTTGACG<br>G  |
| Novel-mir-966        | TTACAGAGCTCTGGTTCATCTCTATCTGAAGCCCGACCTCAACAGCAAACCGTTCAACCCGCTTTCAGGATGAGAAGGAACCC<br>TGTCCCTCCCA      | -29.7      | - | Novel-mir-966-<br>3p  | - | TTCAGGATGAGAAGGAACCCTG       |
| Novel-mir-964        | TGAGGAGATTAGGGGTTGCTCCTCTCTGAAGAAGCTGTGAACCATACTCTGTAGTGGGGATAGGGCTTCAGATAGACGGAACCTA<br>GAGCTCTGATTGC  | -28.8      | - | Novel-mir-964-<br>3p  | - | TTCAGATAGACGGAACCTAGAGC      |
| Novel-mir-963        | AAACTGAGGTAGGCTCCTCAGATTGGTCTCTACGCAGGATTTCAACAACCTGTTGAGAGAGACTCATCAGGGCGCTGTTCAATCG                   | -25.4      | - | Novel-mir-963-<br>3p  | - | TTCAGAGAGACTCATCAGGGCGC      |
| Novel-mir-962<br>-1  | CAGTTGCTCAACAGTCCAGGGCCTGGGTTGTTGTATTTTGCACCTTATAATGTGCCACACATTTTCAATGGGAGACGGGTCTGGACT<br>GCAGGCACCT   | -30.9<br>9 | - | Novel-mir-962-<br>3p  | - | TTCAATGGGAGACGGGTCTGGAC<br>T |
| Novel-mir-962<br>-2  | TACGACTTCAGTTTCAGTCTGGGGTCTGCGTTGTCGATTTGTGCGCTTCAATAATGCCACACATTTTCAATGGGAGACGGGTCTGGA<br>CTGCAGGCAGGT | -34.8      | - | Novel-mir-962-<br>3p  | - | TTCAATGGGAGACGGGTCTGGAC<br>T |
| Novel-mir-961        | TGTACCAGATGATAGGCATCTGTAAGTCTAGTTTGTGAAAATCGTGGCGTTATGGAGCATTTCAAAGCAGACGACATGAGTGGT<br>AATGGGTAT       | -19.3      | - | Novel-mir-961-<br>3p  | - | TTCAAAGCAGACGACATGAGTG<br>G  |
| Novel-mir-959        | TTGAACGTGTGCTCAGTGTTTGGAGAATGTCACGATGCAAGTATAATGCTGTCAAAGTGTGATTATGATGTGACAAACGAGG<br>ATAGGTTCT         | -24.9      | - | Novel-mir-959-<br>3p  | - | TTATGATGCTGTACAAACGAGG       |
| Novel-mir-958        | GTTTTTCAGTCTTACACTTACCTCTGATGTTGACAATCACACATTATGAGCGAGACTGTGAATAATGAAAAA                                | -19.1      | - | Novel-mir-958-<br>3p  | - | TTATGAGCGAGACTGTGAAT         |
| Novel-mir-955        | AGGTGGGGCATTTTTTCCAGTTGGCTCCTGGCCGTGATATTGCCAAGTGTGGAGGAGGTAGGCATTATAAGCATACTGGGGGG<br>TGCTCCAGCT       | -37.9      | - | Novel-mir-955-<br>3p  | - | TTATAAGCATACTGGGGGGT         |
| Novel-mir-954        | TACGGTTGTGAGGTCACCTTGCCTTGTGTCCTTCTCTCGTTATAAGAAATGGGGAGGTGGGCCCTTGGCGT                                 | -22.5      | - | Novel-mir-954-<br>3p  | - | TTATAAGAAATGGGGAGGTGGG       |



|                 |                                                                                                         |            |   |                  |   |                              |
|-----------------|---------------------------------------------------------------------------------------------------------|------------|---|------------------|---|------------------------------|
| Novel-mir-953   | GTGATGACATTCTCAATGGTTCCCGGTAGAGGGAGTGCATGATGGGGGTGGGACACTAGCTCTTCTTAGTTTCCGGAGGAAGTA<br>GGGGCATGTTTGAGC | -26.7      | - | Novel-mir-953-3p | - | TTAGTTTCCGGAGGAAGTAGGGG<br>C |
| Novel-mir-952-1 | TTTGCCAAGTTAAAGCAGTACTTATTGTCTTACGAGCATGTTTTTTTTAGAGGTAGGGAGTCGGTTTAGTGTAAGATTGCTCTGTTA<br>AGGTCAAAA    | -20.2      | - | Novel-mir-952-3p | - | TTAGTGTAGAATTGCTCTGTT        |
| Novel-mir-952-2 | TTTTGCCATGTTAAAGCAGTACTTATTGTGCTTACGAGCATGTTTTTTAGAGTATAGGGAGTTGGTTTAGTGTAAGATTGCTCTGTTA<br>AGGTCAAAA   | -19.2      | - | Novel-mir-952-3p | - | TTAGTGTAGAATTGCTCTGTT        |
| Novel-mir-949   | ATACTGCAGGAAGACAGACACAAGTCAAAGTCCAGCTGGGTATGACTTGGTTTAGATTAGAGGTTCTGTCAAACATATAGCC                      | -18.4      | - | Novel-mir-949-3p | - | TTAGATTAGAGTTCTGTCAA         |
| Novel-mir-947   | CAGAGAGACAGAGCTCCTGCAGGAAATGTATTCTCTGAACCCAGTGTATATTTCTGGTTACATTTATCTCTGGGCTGAGTCCTTC<br>TT             | -18.7<br>4 | - | Novel-mir-947-3p | - | TTACATTTATCTCTGGGCTG         |
| Novel-mir-946   | AAAAGCAGACCCAGGTGGCTGGCTTCGGTGCAAGCAGTGAGGTTTATTACAGTGAAGGTAGTGACAGGGGGTCCAGAGGA                        | -25.9      | - | Novel-mir-946-3p | - | TTACAGTGAAGGTAGTGACAGGG<br>G |
| Novel-mir-945-1 | ACGTTGGCGCTAATGACTCCTGACTTCGCCAGTTGGAGGTCATAAAATAATGTTGAGTCAGTGTGTAACCTCGCTAAAC                         | -20.3      | - | Novel-mir-945-3p | - | TTAATGTTGAGTCAGTGTGTAAC      |
| Novel-mir-945-2 | TGGTGTAAGATTGTTGTTACAGTCTCATAATGACTCCCAACTTGGCAGTCAGAGGTCACCAAAATAATGTTGAGTCAGTGTGTA<br>ACTTCACTAAAC    | -18.1<br>7 | - | Novel-mir-945-3p | - | TTAATGTTGAGTCAGTGTGTAAC      |
| Novel-mir-943   | TGGAGAGGGGGCCGGTAGTCTTGAGTGGTTGTGTGCGCAGCGCGGTTAAGTTGAGCTCTGCCATGGCCTCGTGTAAAC                          | -27.7      | - | Novel-mir-943-3p | - | TTAAGTTGAGCTCTGCCATGGC<br>C  |
| Novel-mir-936   | TGACCTGAGACTTGAGAGCTGGTATCCCATAGTAAATAGCCCTCTGTTGACTTATCTGTTTGGAGCATCTGTTTTCTGTTTATGATG                 | -18.3      | - | Novel-mir-936-3p | - | TGTTTGGAGCATCTGTTTTCTG       |
| Novel-mir-935   | CCTGGTTGGATGACAACATCCTGGACGCTGCGGTTGGAGCTGGAGGGACGCTTCTGTTTCAAGCAGACAGGACTGCAGCATCTCCT<br>AA            | -31.9      | - | Novel-mir-935-3p | - | TGTTTCAAGCAGACAGGACTGCA<br>G |
| Novel-mir-933   | TTAAGCATCTGTTTTCTTGTGTATGCTGAGTATAAGGGCAGTCACATTCTGTTTCTGAGCTTCCCTGCAACAGACTGGTTTA                      | -18.5      | - | Novel-mir-933-3p | - | TGTTTCAAGCAGACTGGTTTA        |
| Novel-mir-931-1 | TCATCTTAAACTCAGTGTGCTTTTACACCATGATCAGACATCTTACTGCAGAGACTTGAACATGTTATTGGGATTAAGGAAC<br>TGATTAAGTTGG      | -21.2      | - | Novel-mir-931-3p | - | TGTTATTGGGATTAAGGAAC         |
| Novel-mir-931-2 | TCCTCTTACTTCTCAGTGTGCTTTTACACCATGATCAGACATCTTACTAAAAAGACTTGAACATGTTATTGGGATTAAGGAAC<br>GTACTAAGTTGG     | -24.9      | - | Novel-mir-931-3p | - | TGTTATTGGGATTAAGGAAC         |
| Novel-mir-931-3 | TGCTCTTACTTCTCAGTGTGCTTTTACACCATGATCAGACATCTTACTAAAAAGACTTGAACATGTTATTGGGATTAAGGAAC<br>GTACTAAGTTAG     | -20        | - | Novel-mir-931-3p | - | TGTTATTGGGATTAAGGAAC         |
| Novel-mir-930   | GATCTCAGTGTGCTTTTACACCATGATCAGACATTAAGGGCAGTGAATGTTATTGGGATTAAGGAACACTGCACTAAGTTG                       | -24.7      | - | Novel-mir-930-3p | - | TGTTATTGGGATTAAGGAAC         |
| Novel-mir-927   | GTGCTGTTGCCAGGTTTCCAAGTTTGGTCGTTAACTGGAGGGGATGACCATGTTAAACGCTGAGCTGAAGTCCACGAAACAGCA                    | -24.8      | - | Novel-mir-927-3p | - | TGTTAAACGCTGAGCTGAAGTCC      |
| Novel-mir-926   | TTTCCCTTCCCGAAGCAGCAGTGCAGTACCTCGATGTACAGAGTGTGTTTGTAGTGAATCGTGAATCTTGAAC                               | -26.4      | - | Novel-mir-926-3p | - | TGTGTTTGTAGTGAATCGTGG        |
| Novel-mir-923   | GAGTGTACTTCTTGGGGCCTCAGATAAAAGAACAGGTTGAATCTAAATCAGCTATAAATGTGTCTAGATTGGTCTAAAGAAAAA<br>TCTAA           | -20.6<br>6 | - | Novel-mir-923-3p | - | TGTGTCTAGATTGGTCTAAAGA       |
| Novel-mir-921-1 | AGATGCAGCAGTCTCTGGCGATCACCCGGCCCACTTGAAGTGCACGGTCCACCTGTGGTGTGTAGTACAGCTGGGGCAGC<br>TCCACCATCG          | -37.4      | - | Novel-mir-921-3p | - | TGTGTAGTACAGCTGGGGCAGC       |
| Novel-mir-921-2 | TGGCGATCACCCGGCCCACTTGAAGTGCATGGTCCACCGGTGGTGTGTAGTACAGCTGGGGCAGCTCCACCGTCG                             | -34.5      | - | Novel-mir-921-3p | - | TGTGTAGTACAGCTGGGGCAGC       |
| Novel-mir-919-1 | CAATGTTTATCCCGGAGATATCTAGGATGATGTTTACAATGAGATATGCTGGTCTGTTGAAAGTGTGTAGAGACAGTTTATCGGATG<br>CCATAA       | -23.4      | - | Novel-mir-919-3p | - | TGTGTAGAGACAGTTTATCGG        |
| Novel-mir-919-2 | CAGTGTTCACCCGGAGATGCTAGGATGTGTGTTACGATAAGATACGTGAGTTGTTGAAAGTGTGTAGAGACAGTTTATCGGATG<br>GCCACAC         | -24        | - | Novel-mir-919-3p | - | TGTGTAGAGACAGTTTATCGG        |
| Novel-mir-915   | TCTGCTTTGGCCAGGACATTGTCAAATGCATTTTTTCTGCAGAGAACTGTGACAGAACTGGAGATGGTGCACGACGCGAG                        | -22.2      | - | Novel-mir-915-3p | - | TGTGACAGAACTGGAGATGGT<br>G   |
| Novel-mir-913   | CGACAGAACTCATCCAGAAGTGGCCACAACTGAGGGCTCTGTCTGACACCACATCTCTGGGAGGCCATGCA                                 | -19.3      | - | Novel-mir-913-3p | - | TGTCTGACACCACATCTCTGGG       |
| Novel-mir-912-1 | TATTGCCTTTTCAATGACGCCACATGCTGACACATGTAGGATGTCCCAATTTCTACATTGTCAAGTCTGGAGCTGTAATACATCAGA<br>ACCTT        | -27.5      | - | Novel-mir-912-3p | - | TGTCAAGTCTGGAGCTGTAATAC<br>A |
| Novel-mir-912-2 | TATTGCCTTTTCAATGACGCCACATGCTGACACATGTAGGATGTCCCAATTTCTACATTGTCAAGTCTGGAGCTGTAATACATCAAAA<br>CCTT        | -27.5      | - | Novel-mir-912-3p | - | TGTCAAGTCTGGAGCTGTAATAC<br>A |
| Novel-mir-911   | TTGTTTCAGCGGATCTTCTGTATTGACTAAGTCTCTGCAACCGCTGTCAACAGCTGCTTGTCTACTGTATTCAACTCGTGAGAAGC<br>TGAACTTAATAT  | -23.1      | - | Novel-mir-911-3p | - | TGTATTCAACTCGTGAGAAGCTG<br>A |

|                 |                                                                                          |       |   |                  |   |                          |
|-----------------|------------------------------------------------------------------------------------------|-------|---|------------------|---|--------------------------|
| Novel-mir-909-1 | TGGCGATCACCCGGCCCCACTTGTAACTGCACGGTCCACCTGTGGTGTGTAGTACAGCGTGGGGCAGTCCACCATCGCCC         | -40.5 | - | Novel-mir-909-3p | - | TGTAGTACAGCGTGGGGCAGTCC  |
| Novel-mir-909-2 | TGGCGATCACCCGGCCCCACTTGTAACTGCATGGTCCACCGTGGTGTGTAGTACAGCGTGGGGCAGTCCACCATCGCCC          | -39   | - | Novel-mir-909-3p | - | TGTAGTACAGCGTGGGGCAGTCC  |
| Novel-mir-907   | TTCCGGTCAAGCAGTGTAAATTTTACAGTGAATGTGAACAAGTTCATACGATAACCAAGTGAAGTGTGAATGATGAGAGTAACC     | -19.9 | - | Novel-mir-907-3p | - | TGTAGAATGATGAGAGTAACCGG  |
| Novel-mir-905-1 | GGACGAGCAGCGTGGGGATTTTGCCTGAATATTATGCTGGGAAAGGAAACCAAGAATAATTAGTTGTACACGGAGTTAACTTCA     | -21.4 | 1 | Novel-mir-905-3p | - | TGTACACGGAGTTAACTTCACTG  |
| Novel-mir-905-2 | GGACGAGCAGTGTGGGGATTTTGCCTGAATATTATGCTGGGAAAGGAAACCAAGAATAATTAGTTGTACACGGAGTTAACTTCA     | -23.2 | - | Novel-mir-905-3p | - | TGTACACGGAGTTAACTTCACTG  |
| Novel-mir-904   | GGCTTCTGCGCATGACTATTAGATTTTCATAAATATGTTTTATTCGTCGCATCGAAGTGGCCATCTGTAAGTAGATTTGTGTAGTAG  | -24.5 | - | Novel-mir-904-3p | - | TGTAAGTAGATTTGTGTAGTAGGC |
| Novel-mir-903   | AGGCCAAATTAATATTACAAGCTCAAGTATTTGCACCTCCACACTGCACGCAGGCAGATGTAAGATGAAAGACCCTGAGCCACC     | -18.2 | - | Novel-mir-903-3p | - | TGTAAGATGAAAGACCCTGAGC   |
| Novel-mir-897   | AGACCTCAGTGTGCTTTTGGCACCATGATCACACATCTTATTACAGAGACTTGAACATGGTATTGGGATTAAGGAAGTGCACCTA    | -20.6 | - | Novel-mir-897-3p | - | TGGTATTGGGATTAAGGAAGTGC  |
| Novel-mir-896   | AGGACTGGTATATGACCATCTTTATTTAGTCTGTATAATCCATACTGGTCCCAAGTGGTAAATGCTCTGCAGAGAGGGAGGTGG     | -24.2 | - | Novel-mir-896-3p | - | TGGTAAATGCTCTGCAGAGAGGG  |
| Novel-mir-891   | TAGGGGATGCCGTCAAGCTGAAGAAGGAGTCTTTTCAAACTGGTGGCTCGTGGGACACCTGAGGCAGCTGATGGGTATCGGCA      | -37   | - | Novel-mir-891-3p | - | TGGGACACCTGAGGCAGCTGATG  |
| Novel-mir-890   | AAAACCAGGATCCAAATCCCATGTTCAAATGACGAGTGAAGTACTGGGAATTAAGTGGTAGTTTGGCTCCATTTTGC            | -20.9 | - | Novel-mir-890-3p | - | TGGGAATTAAGTGGTAGTTTGG   |
| Novel-mir-887   | GGTTCGATACAATTGCTTTATGAGCTACCACACATGTGTCGGAGCCCTCAAGTCTCGATGTTGTGGGGTGTCTTGGCTGATTCGG    | -23.2 | - | Novel-mir-887-3p | - | TGGATGTTGTGGGGTGTCTTGG   |
| Novel-mir-886   | GATTAGGAATATATGCTGGAGCAGTCTTTCAATCTACAATCGCAGAATTAACAAGTGGATGAAATGCTGGCTAATGGTATTACT     | -18.1 | 5 | Novel-mir-886-3p | - | TGGATGAAATGCTGGCTAATGGT  |
| Novel-mir-885   | GAGGGTTCATGGGAGTTTGCCEAACAGTCCACATGTGTTTCTGTCGATCTGGAGAAGGCATTCGTTCTGTCGCCT              | -30.3 | - | Novel-mir-885-3p | - | TGGATCTGGAGAAGGCATTCGT   |
| Novel-mir-883-1 | AAGGACCGCTCCTACCCAGTGTCCGACGCTCCACCTCTACCACGAAGTCCATGAGGGATCAAGTTGGAGGAGTATGGGGGCT       | -34.8 | 9 | Novel-mir-883-3p | - | TGGAGGAGTATGGGGGCTGTGG   |
| Novel-mir-883-2 | GAGGGCCGCTCCACCCAGTGTCCGACGCTGCCACCTCAACCACAAACTGCCGTGTGGGTCTGTTGGAGGAGTATGGGGGCT        | -38.1 | - | Novel-mir-883-3p | - | TGGAGGAGTATGGGGGCTGTGG   |
| Novel-mir-881   | TGCTGTTGGCACAAATTTGCCTCTTTCAATTCTCTACTACCATTGCAACTCCCTGCTTGCCTGCAATGGAAGAAGACTGTATTTGAAC | -21.4 | - | Novel-mir-881-3p | - | TGGAAGAAGACTGTATTTGAACC  |
| Novel-mir-321-2 | TAACATCACACGTCAGATCTCTCTCACCACCAAACTCGCGCGCAGGCAGCTTGGAAAGATGAAAGACCCTGGACCAAGAAACCTA    | -21   | - | Novel-mir-321-5p | - | TGGAAGATGAAAGACCCTGGAC   |
| Novel-mir-321-3 | TAACATCACACGTCAGATCTCTCTCACCACCAAACTCGCGCGCAGGCAGCTTGGAAAGATGAAAGACCCTGGACCAAGAAACCTA    | -21   | - | Novel-mir-321-5p | - | TGGAAGATGAAAGACCCTGGAC   |
| Novel-mir-321-4 | TAACATCACACGTCAGATCTCTCTCACCACCAAACTCGCGCGCAGGCAGCTTGGAAAGATGAAAGACCCTGGACCAAGAAACCTA    | -21.7 | - | Novel-mir-321-5p | - | TGGAAGATGAAAGACCCTGGAC   |
| Novel-mir-878   | TTTTAGCTTACTATGACCTGGATGACTGAGAATTTGCAACCTGAGAGTAGAGTTGGAGTGCCTAATCAGAGGAGGCAGTAGAGAG    | -30.8 | - | Novel-mir-878-3p | - | TGCTAATCAGAGGAGGCAGTAG   |
| Novel-mir-875   | CGGCAGAGCGTCAAAGTCAGGGTAGTCTTGAAGTCTCCGGTCTTCTAGCATGCTAACTCTGAGAGGCGAGGCAGTTCAGT         | -24.6 | - | Novel-mir-875-3p | - | TGCTAACTCTGAGAGGCGAGGC   |
| Novel-mir-872   | TCAGTGTATTAATAAATTAATCACATTTTGTGGCTAGGGATGCTGGAGATCTAGTTCTGTTGGTGCCTTAGACCTCTCTGCTGCCTT  | -19.1 | - | Novel-mir-872-3p | - | TGCCTTAGACCTCTCTGCTGCCT  |
| Novel-mir-867   | ATCCTGATTTCTACGGTCAATACAGTGAAGTCTTCAATATTATATGCTTTTTCCACTAGAGATGCATTAATACTGTGAAACTGCC    | -18.4 | - | Novel-mir-867-3p | - | TGCATTAATACTGTGAAACTGCC  |
| Novel-mir-866   | TGACTGGAGTAGCTTGGTTCAGATTACCGGCAGTAAGTCAAGCTGTTTCTGGTGCATGTTGACTCTGCCAAGGCTGCCCTTTGT     | -29.1 | - | Novel-mir-866-3p | - | TGCATGTTGACTCTGCCAAGGC   |
| Novel-mir-857   | GATGACCAGCATTAGTGAAGGGTATTGTCCATGGAGTGTAGGTCGGCTGCAAGGGAAGGCCACACTCTGAGCTGTGCA           | -29.3 | - | Novel-mir-857-3p | - | TGCAAGGGAAGGCCACACTCTG   |
| Novel-mir-856   | CTCCCTCTCTCGGAACAGTTCCTTTAGCACAAGACTGTTACATCCCAAGTGAAGAAGGAGCGTTACTGTAGGTCGTTCTCC        | -20.5 | 7 | Novel-mir-856-3p | - | TGCAAGAAGGAGCGTTACTGTAG  |
| Novel-mir-854   | CGAGGCTCGAGGCTCTGAACAGTCTTTTACGACACAAGACTGTTACATCCCAAGTGAAGAAGGAGCGTTACCGTAGGTCGTTCTCC   | -23.4 | 7 | Novel-mir-854-3p | - | TGCAAGAAGGAGCGTTACCGTAG  |

|                 |                                                                                                         |       |   |                  |   |                                |
|-----------------|---------------------------------------------------------------------------------------------------------|-------|---|------------------|---|--------------------------------|
| Novel-mir-852   | TTCTAGCTCTCTCATTGCACACTACAGTCACAGTCACAGTTGCACCACAGGTGCACCACAGGTGCAACTGTGACTGACGACATCTGGC<br>TTGGA       | -39.6 | - | Novel-mir-852-3p | - | TGCAACTGTGACTGACGACAT          |
| Novel-mir-849-1 | TCITTTGGATCAAGTACGTTGCTGTCCAAACCCATCCTCGTTCATCTGCAAAATGATGTAATTTGGCCAGGCACCTGGCTGACCAA<br>AT            | -23.2 | - | Novel-mir-849-3p | - | TGATGTAATTTGGCCAGGCACCTGG<br>C |
| Novel-mir-839-2 | AGGTCTCTCTGTGCGAGTGGGGAGTGAATGTGTCATATGTTTTGATGCTGGAAGCACCTTCTGAGTTATCATTCTGTAGACAGTC<br>AAGATT         | -18.5 | - | Novel-mir-839-3p | - | TGAGTTATCATTCTGTAGAC           |
| Novel-mir-835   | GGGGAGTTGTGGAAGGGCAGACATGGTGGCTTTGGAGAATCGTCAACGATGTTGAGTATGACAGTGTGCCCTGGGAGGGA<br>GGAAG               | -19.9 | - | Novel-mir-835-3p | - | TGAGTATGACAGTGTGCCCTGG<br>G    |
| Novel-mir-833-1 | TGCGGACGCTGGGGTCACTCCTGGTCGTAGGTGAAGCGATGATGGCTGAGGAGACAGGAGCATGCATAGATAGTTAACG                         | -18.3 | - | Novel-mir-833-3p | - | TGAGGAGACAGGAGCATGCATAG        |
| Novel-mir-833-2 | TGGTTATGGATCGGGCTGTGGACGCTGGGGTCACTCCTGAGCTAGTCTGGTTGAAGCGATGATGGCTGAGGAGACAGGAGCATG<br>CATAGATAGCTAATG | -33.2 | - | Novel-mir-833-3p | - | TGAGGAGACAGGAGCATGCATAG        |
| Novel-mir-830   | ACAGAGTCACGTGTTAAAAACAGGCCCTGGTGACCGGGAGCTGTGGCCAGCTGTGTGAGCAGGGCTGTGTTTTGAGCAGGT<br>GTGCTG             | -48.5 | - | Novel-mir-830-3p | - | TGAGCAGGGCTGTGTTTTGAGC         |
| Novel-mir-823   | AATATTTTCAAGTTGCATTTTTAGTTCTCTTAATTCATTTTTGTGTTTCTCGTAGGGTTTGAGAATGTAATCTGTGAGTTGTTTTAT<br>CT           | -18.6 | - | Novel-mir-823-3p | - | TGAGAATGTAATCTGTGAGT           |
| Novel-mir-822   | CCTGACGTTCCACCAGGTGGCGCATTAGGCGCGGTGATACATTGACTTGATTTTGGCGAGCCAGGGCTACTCTCAG                            | -19   | - | Novel-mir-822-3p | - | TGACTTGATTTTGGCGAGCCAGG<br>G   |
| Novel-mir-821   | TGGGTGTTTTGGCTGTGTGACTACAAATTTGCCAGTCACTTGTCACTTATAGGGATGCTACTCATGACTGTGTGCACATGTGCTT<br>CCATGCTCTC     | -21.7 | - | Novel-mir-821-3p | - | TGACTGTGTGCACATGTGCTT          |
| Novel-mir-820   | AGCTCAGAGAGGAATCTTCTGCGAACCACTGCTTCGAGGCTTGATCGTTGCCAAAAAGACATGTGACTGATGATGCCAGCGACG<br>AACAGCTGGCC     | -24.8 | - | Novel-mir-820-3p | - | TGACTGATGATGCCAGCGCAGA<br>A    |
| Novel-mir-819-1 | AGTCGAGCCAGGAGAGGGATCTCCGAACCACTGCCTCGGGGCTGTCTCGTTGCCTAAAAGACTTGTGACTGATGACGTCCGAC<br>GCAGAAATGGCTGGCC | -35.2 | - | Novel-mir-819-3p | - | TGACTGATGACGTCCGACCGAGA<br>A   |
| Novel-mir-819-2 | CGCGAACCACTGCCTCGAGGCTGTATTGTTGCCAAAAGACACGTGACTGATGACGTCCGACCGAGAATCGGCTGGCC                           | -18.7 | - | Novel-mir-819-3p | - | TGACTGATGACGTCCGACCGAGA<br>A   |
| Novel-mir-819-3 | CGCGAACCACTGCTTCGAGGCTGTATCGTTGCCAAAAGGACATGTGACTGATGACGTCCGACCGAGAATCGGCTGGCC                          | -22.7 | - | Novel-mir-819-3p | - | TGACTGATGACGTCCGACCGAGA<br>A   |
| Novel-mir-819-4 | CTCCAGCGAACCACTGCCTCGAGGCTGTATCATTGCCAAAAGACACGTGACTGATGACGTCCGACCGAGAATCGGCTGGCC                       | -24.4 | - | Novel-mir-819-3p | - | TGACTGATGACGTCCGACCGAGA<br>A   |
| Novel-mir-819-5 | TCGAGCTGGGAGAGCTCTCCCGAACCACTGCCTCGAGGTTGTATCGTTGCCAAAAGACACGTGACTGATGACGTCCGACG<br>CAGAAACGGCTGAG      | -26   | - | Novel-mir-819-3p | - | TGACTGATGACGTCCGACCGAGA<br>A   |
| Novel-mir-819-6 | TTCCACGAACCACTGCCTCGAGGCTGTATCGTTGCCAAAAGACACGTGACTGATGACGTCCGACCGAGAATCGGCTGGCC                        | -20.2 | - | Novel-mir-819-3p | - | TGACTGATGACGTCCGACCGAGA<br>A   |
| Novel-mir-817   | AACCTGACTAGATTTCTAGTCTAGATTTTCAGTTGATTTTTTCAGTTTACTATGACCTGGATGACTGAGAATCTGCACGGACATCTAA<br>TATTCTG     | -25.1 | - | Novel-mir-817-3p | - | TGACTGAGAATCTGCACGGACAT<br>C   |
| Novel-mir-816   | AAGTCCAAAGCATATGCCAGTGTGTGAGTTTTTTGGATGCACAGTATACTGACTCAAGAAACTGGCATATGTTTTGGACAT                       | -44.3 | - | Novel-mir-816-3p | - | TGACTCAAGAACTGGCATATG          |
| Novel-mir-815   | AGTCCAAAGCATATGCCAGTGTGTGAGTTTTTTGGATGCACAGTATACTGACTCAAGAAACTGGCATATGTTTTGGACA                         | -44.3 | - | Novel-mir-815-3p | - | TGACTCAAGAACTGGCATAT           |
| Novel-mir-814   | AGTCCAGTTTTGTGGACCACAGGATCTCGTCTGCTTTTTGCAGATGACGTTGCTCCTGTTAGCTCCATCAAAACAAGGAC                        | -38   | - | Novel-mir-814-3p | - | TGACGTTGCTGTTAGCTCCATC         |
| Novel-mir-813   | CGGGAAGTGATCCAGACAAGAGCTGAGGGAAGCAGGTTCCCTGGATGAGGTTTGTCAACCAATGCTGACCGAGGACTTCTGGG<br>TGACATCGGACA     | -28.6 | - | Novel-mir-813-3p | - | TGACCGAGGACTTCTGGGTG           |
| Novel-mir-811   | ACCATAAACATGAATCTGTCCCTGACCACAATCGTCAGGTTGACAATCTCGGGGCAGCATATATGCACCAAGC                               | -18.4 | - | Novel-mir-811-3p | - | TGACAATCTCTGGGCGACATAT<br>A    |
| Novel-mir-810-1 | AGCTTTGGAATAATGATCAACGTGAGAATGACAGGGTTCCCTGGGAGGAGGTAGGCCGGTGACAAAGTCTAGGGCGATATGAG<br>TCCAGGGCC        | -30.5 | - | Novel-mir-810-3p | - | TGACAAAGTCTAGGGCGATATGA        |
| Novel-mir-810-2 | CGGTGACGATGTTGAGAATGACCATGTTGCCCTGGGATGGAGGCAGGCCGTTGACAAAGTCTAGGGCGATATGAGACCAGGGC<br>C                | -29.5 | - | Novel-mir-810-3p | - | TGACAAAGTCTAGGGCGATATGA        |
| Novel-mir-808-1 | AACAAAGACAGGTATCAGAATCAGAGTCAGCTTCACTGGCCAAGTATCTTGACCACACAATGAATTTGACTCTGGTACAGTGGCTCT<br>TAGTGTG      | -26   | - | Novel-mir-808-3p | - | TGAATTTGACTCTGGTACAGTGG<br>C   |
| Novel-mir-808-2 | ATTTCTGGATGCTAATGTCTAAAGATCAGAATCAGAATTAGAATGAATTTGACTCTGGTACAGTGGCTCTCAATGTG                           | -19.3 | - | Novel-mir-808-3p | - | TGAATTTGACTCTGGTACAGTGG<br>C   |
| Novel-mir-808-3 | TAATTCAGGTCCTGTATTCAGAATCAGCTTTATTGGCCAGGTGTGTTGGACACACAATGAATTTGACTCTGGTACAGTGGCTCTTAA<br>TGTG         | -28.7 | - | Novel-mir-808-3p | - | TGAATTTGACTCTGGTACAGTGG<br>C   |

|                 |                                                                                                           |       |   |                  |   |                          |
|-----------------|-----------------------------------------------------------------------------------------------------------|-------|---|------------------|---|--------------------------|
| Novel-mir-806-1 | GATGATGGTGTTCATGTTGGAGACACAGTAATGGGTGTACAGGGTGAAGAGTCTGGGGCTGAGACAGCAGCCCTGCGG                            | -20.3 | - | Novel-mir-806-3p | - | TGAAGAGTCTGGGGCTGAGACAGC |
| Novel-mir-806-2 | GGGTGAGAGGGTACGGTTTCAGCCACAGCTTTCTGTCTGCCTTACAGTCTGGGTGTACAGGGTGAAGAGTCTGGGGCTGAGA<br>CAGCAGCCGTGCGG      | -37.5 | - | Novel-mir-806-3p | - | TGAAGAGTCTGGGGCTGAGACAGC |
| Novel-mir-805   | CGGGAGATTGACAGCGGATCGGTGCAGCTTCTACAGTAATGCGGTTGATGTACCAGTCCGCTGTTGGTGAAGAAGGAGCTGAGCT<br>GTAAGTTGAAGCTCTC | -34.2 | - | Novel-mir-805-3p | - | TGAAGAAGGAGCTGAGCTGTAAGT |
| Novel-mir-804   | AAGTGGATTCTGTGAGTAACCTATTTTGTGACTGGATGCACAGTGAACCTGTAATGTGTGGACACGCGTCAAACAA                              | -19.3 | - | Novel-mir-804-3p | - | TGAACTTGTATGTGTGGACAGC   |
| Novel-mir-802   | AAATGCTTAAATCGATTTTTTGTGTGCAGTTTGTGAGCTTTGCAGCTTACCAGCGTTGAACTCGGGAAGAAATTTGACAGAAGC<br>AATA              | -20.1 | - | Novel-mir-802-3p | - | TGAACTCGGGAAGAAATTTGAC   |
| Novel-mir-801   | AAGGGTGAGGGTTTGTAGTCTTTAGGGTCCGGCCAGGGGACAGAAAAAGAGTACCAGCTGAACAGAGGACTCAGGACAAGGGC<br>AGCATCGGC          | -29   | - | Novel-mir-801-3p | - | TGAACAGAGGACTCAGGACAAGG  |
| Novel-mir-800   | GTGATCATGGGCTCTGGCTGCATCTGTATCAGTCTTCTCTGTATGAGCTGAAAGTTAGAGGGACGGCCAAAGTCTTAGTCA                         | -28.2 | - | Novel-mir-800-3p | - | TGAAAGTTAGAGGGACGGCCAA   |
| Novel-mir-798   | AGCCAGAGGGCAAAGAAGTGAACAGTCCGTGCCAGGGTGGGTTGGATCTTTGAGGACGGAGGACGTTTCTACGC                                | -21.4 | - | Novel-mir-798-3p | - | TCTTTGAGGACGGAGGACG      |
| Novel-mir-796   | CCGATGCTCTGGCTGATAGTCTAGTGGTGTGGATCAGTGTGAATCGATCTTGTCTACTCTGGCATAACAGCTTGTATCAT                          | -30.4 | - | Novel-mir-796-3p | - | TCTTGTCTACTCTGGCATAACAGC |
| Novel-mir-795-1 | ATGCTGGTTTCCGAGCACTAATTCGGCCATTGAGACCATTGTGTGAGAGAATTTGACAAACTGTTCTTTGATAGATACAGGGTTTCTG<br>GTGACCAAGTT   | -29.5 | - | Novel-mir-795-3p | - | TCTTGTAGATACAGGGTTTCTG   |
| Novel-mir-795-2 | ATGCTGGTTTCTGAGCACTAGTTCGGCCATTGAGACCCTGCATGAGAGAATTCGACAAACTGTTCTTGTAGATACAGGGTTTCTG<br>GTGACCAAGTT      | -28.6 | - | Novel-mir-795-3p | - | TCTTGTAGATACAGGGTTTCTG   |
| Novel-mir-795-3 | TAAATGGTCATTGAGACCCTGCATGAGAGAATTCGACAAACTGTTCTTGTAGATACAGGGTTTCTGTTGACCAAGTT                             | -27.8 | - | Novel-mir-795-3p | - | TCTTGTAGATACAGGGTTTCTG   |
| Novel-mir-794   | TAACATCTTGTCTGTCTGCATCTCTAAGTTAGTGCCTGTGCCTGTATGCCAGTCTTGTAGAGCGAAGCAGACACACAACAACACC                     | -22.8 | - | Novel-mir-794-3p | - | TCTTGTAGAGCGAAGCAGACACA  |
| Novel-mir-790   | AAAATGTGTCCAGCCAGGATAATTAAGGAGGTCATTGACACTGTGGGGCCACTTTGCTCATATTTCTTAACTGTCTTTAGGCT<br>GGGCATGGAAC        | -33.4 | - | Novel-mir-790-3p | - | TCTTAACTGTCTTTAGGCTG     |
| Novel-mir-789   | TTCAGGCAGGTGACCAGGCTCTCTTGGGAAGACAATGTTTGGTCTTAAAGCAGGTGGGATGATGCTCTGGCTGAG                               | -23.1 | - | Novel-mir-789-3p | - | TCTTAAAGCAGGTGGGATGATG   |
| Novel-mir-788   | TTCAGGCAGGTGACCAGGCTCTCTTGGGAAGGGGACGATGTTGTAGTCTTAAAGCAGGAGGAAACGATGCTCTGGCTGAG                          | -29.6 | - | Novel-mir-788-3p | - | TCTTAAAGCAGGAGGAAACGATG  |
| Novel-mir-787   | CACAGGTCAAAGGAGGCGAGAGGATCATTGCAGACCCCTCACACCCTGGACACAATCTGTTTGAACCTCTCCCTCTGGATGG<br>CGTTAC              | -29.2 | - | Novel-mir-787-3p | - | TCTGTTTGAACCTCTCCCTCTGG  |
| Novel-mir-786   | CACGGGTCAAAGGAGGGTGGAGAGGATCACTGCAGACCCCTCACACCAGGACACAATCTGTTTGAACCTCTCCCTCTGGACGG<br>CGCTAC             | -27.1 | - | Novel-mir-786-3p | - | TCTGTTTGAACCTCTCCCTCTGG  |
| Novel-mir-785-1 | TGTACACCTCACAGGGCAAAGGAGAGGGAAAGATTTCTGCAGACCCCTCACACCCTGGACACAATCTGTTTGAACCTCTCTCTCTG<br>GCTGGTCTAG      | -25.1 | - | Novel-mir-785-3p | - | TCTGTTTGAACCTCTCTCTCTGG  |
| Novel-mir-785-2 | TGTACACCTCATGGGTGAGTGGGGGACAGAGAAGATTTCTGCAGACCCCTCACACCCTGCACACAATCTGTTTGAACCTCTCTCTCT<br>CTGGACAGTGTAC  | -28.1 | - | Novel-mir-785-3p | - | TCTGTTTGAACCTCTCTCTCTGG  |
| Novel-mir-784-1 | GCCAGCGCCTGCTCGGCATCGTCTGTACTGAGCCCTTCCACTGCCGCTGTTTATCACGGCGTTTGAACAGGCAATTGC                            | -26.6 | - | Novel-mir-784-3p | - | TCTGTTTATCACGGCGTTTGAAC  |
| Novel-mir-784-2 | GGTGGTGGCCTGCGGGCGCCTGCTGGCGCTGTGGAGACTGAACCTTCCACTGCCGATCTGTTTATCACGGCGTTTGAACAGG<br>CAATTGC             | -32.9 | - | Novel-mir-784-3p | - | TCTGTTTATCACGGCGTTTGAAC  |
| Novel-mir-784-3 | TGCCGGGCGCTGCTCGGCACCGTATGACTGAACCTTCCACTGCCGCTGTTTATCACGGCGTTTGAACAGGCAACTGC                             | -24.6 | - | Novel-mir-784-3p | - | TCTGTTTATCACGGCGTTTGAAC  |
| Novel-mir-781   | CATTTTGTGATACCACATACGTCACATCCAGGCTGCCACCTGTCTGTGAGGATGTATGTATGCCAAACTATTGT                                | -22.1 | - | Novel-mir-781-3p | - | TCTGTGAGGATGTATGTATGCC   |
| Novel-mir-780   | ATTTTGTGATACCACATACGTCACATCCAGGCTGCCACCTGTCTGTGAGGATGTATGTATGCCAAACTATTG                                  | -22.1 | - | Novel-mir-780-3p | - | TCTGTGAGGATGTATGTATGCC   |
| Novel-mir-775   | CCATTCGGCTTGCATGAGACCTGCAACCTTTCAAGTGGTTGGTGGACGAGTTCTGAGAGAGCAGAGGACTATGCAGCTGCTTA<br>C                  | -33.1 | - | Novel-mir-775-3p | - | TCTGAGAGGAGCAGAGGACTATG  |
| Novel-mir-773   | GGGCTGAAGACTCTGATATCTTCTCCCTGAAGGCAGGAGTCTGAAGTGGGAGTGTGAGGGTGAAGTGC                                      | -22.7 | - | Novel-mir-773-3p | - | TCTGAAGTGGGAGTGTGAGGGT   |
| Novel-mir-772   | CGGAGTGATATGGGCATGCCAACGAGTGTGTCAGCAGACGGCAGCTGCGTTCTGAACAAGTTGAGCCTGGAGAGTGTATGC                         | -22.8 | - | Novel-mir-772-3p | - | TCTGAACAAGTTGAGCCTGGA    |

|                 |                                                                                                       |            |   |                  |   |                          |
|-----------------|-------------------------------------------------------------------------------------------------------|------------|---|------------------|---|--------------------------|
| Novel-mir-771   | CCAGTTTCACAGTGACTACATCTATTATCGGCTTCTCAGGGGTTAAACAGATGAGTGTCCGTTCTCTGAAGAAGTTCCTTGTAGGTG<br>GAACAATC   | -24.8      | - | Novel-mir-771-3p | - | TCTCTGAAGAAGTTCCTTGTAGG  |
| Novel-mir-770-1 | ACAACCTAGCCATCCTCAGTGCAGAACACCAGAGGGATTGGGACATGCACCTCCCTCTCGTCTTACTGGCCTACAGGTCGGCTGTAC               | -27.5      | - | Novel-mir-770-3p | - | TCTCGTCTTACTGGCCTACAGGTC |
| Novel-mir-770-2 | ACAACCTGCCATCCTCAGTGCAGAACACCAGAGGGATTGGGACATGCACCTCCCTCTCGTCTTACTGGCCTACAGGTCGGCTGTAC                | -25.7      | - | Novel-mir-770-3p | - | TCTCGTCTTACTGGCCTACAGGTC |
| Novel-mir-769   | CAGAGAGCTGTAGCAATGCTAAGTCTCAGTATCTATCCAAATTATCTCGGAGAATAGGCATCAGCCGAGAGTCTTTTT                        | -21.9      | - | Novel-mir-769-3p | - | TCTCGGAGAATAGGCATCAGCCG  |
| Novel-mir-768   | TGGGTTATTTTGGTCCCGCTGCTGCGCTGAAGGACGGCTGTATATTATGAGCTCTCCTTTGAGTCAGTCGGCCCCAGATCTGCCC                 | -36.1      | - | Novel-mir-768-3p | - | TCTCCTTTGAGTCAGTCGGCCCC  |
| Novel-mir-767   | TGTGGTGCAACGTGGCGTTGGTGAATGGAGCGAGAGTCTGAGGATCTCATCTCGGTACCTAATGGCAGTCACGCTACC                        | -26        | - | Novel-mir-767-3p | - | TCTCATCTCGGTACCTAATGGCA  |
| Novel-mir-764   | CCTGTTGGCCGACGCTATGGTCTGATGGGCATGTTGGCCAGAGATCTCAAAACAGGATTGTAGACGGATTACAAGTTG                        | -27.3      | - | Novel-mir-764-3p | - | TCTCAAAACAGGATTGTAGACGG  |
| Novel-mir-760   | TATAAGCTTGTGGTCTCAGTGTGTCGATGAGGATTGTTCTTAGTGTGCATTCACATCCTCTAGTAGACTGTGAGAAGGCACT<br>TCACCTAGT       | -21.8      | - | Novel-mir-760-3p | - | TCTAGTAGACTGTGAGAAGGCAC  |
| Novel-mir-252-2 | CCTCATTGTAACATGAGGTTTAGCTCCATGATCATATCTCTCTCCTCCTCTTCTCCTACTTCTTAGGAGTAGACACCTTACTGG<br>CCACAATCAGA   | -18.1<br>5 | - | Novel-mir-252-5p | - | TCTAGGAGTAGACACCTTACTGG  |
| Novel-mir-758   | GACTGTTGTATCATCTGTGAAGTTGAGGAGTTTAAACACAGGGTCCCTGAGGTGCAATCGTTTAGGGAGAACAGCAGAGGGGAGA<br>GCAAAC       | -22.5      | - | Novel-mir-758-3p | - | TCGTTTAGGGAGAACAGCAGAGG  |
| Novel-mir-755   | ATAAAATGAGCTAGAGCTAGCATCTGCTCCGGGAGAGGGCCTTGGTGGGTAGAGTGAAGCAGTGAAGCACCACCAACA                        | -20.4      | - | Novel-mir-755-3p | - | TCGGGTAGAGTGAAGCAGTGAAG  |
| Novel-mir-754   | ATTAGCACAGCTAACTTATTAGCAAGCGAGTCCGACTTTGATTTCTGACTGCATCGCTTCGGCTGTGATTTAGCATCCGCTACT                  | -19.8      | - | Novel-mir-754-3p | - | TCGCTTCGGCTGTGATTTAGC    |
| Novel-mir-747   | CGGACACGGCGGGCCCGTTCTTACAGGGTCCAGCGGCATGCCCTAATCCATGGGTTTATCCGTTAGGTCCTGGAAGGATGTGT<br>TGGTCCC        | -38.3      | - | Novel-mir-747-3p | - | TCCGTAGGTCCTGGAAGGATG    |
| Novel-mir-746   | TCTCCTGGGTTTTCCCTGGGGCCTTTTCTGGTGGGACATGCCCGAACAACCTCCCTAGGAAGGCGCTCAGGAGGCATCCAAAAACA                | -34.8      | - | Novel-mir-746-3p | - | TCCCTAGGAAGGCGCTCAGGAG   |
| Novel-mir-743   | AGACTTGAGAAGCAGACACAGACCCAGAACTGCAGAGAAATCCAGTGGTTCTGTTTCTCCTCTCAATCC                                 | -22.8      | - | Novel-mir-743-3p | - | TCCAGTGGTTCTGTTTCTCTCC   |
| Novel-mir-741   | CCTGTTGAGAGATGCTCATCACAACATTGTTCAAGTGTGATGTTACACAAAGCCCTATGTTGACTAATGCTGGTGGGGAATC<br>TGCAG           | -19.3      | - | Novel-mir-741-3p | - | TCATGTTGACTAATGCTGGTGG   |
| Novel-mir-736-1 | GTCTCCACAGCCAAGTTCAGCTCAGATGGCTGAGCTCATTGCTCTCATAAAGCATGTAAGTTGGCAAAGATAAAG                           | -20.8      | - | Novel-mir-736-3p | - | TCATAAAGCATGTAAGTTGGCA   |
| Novel-mir-736-2 | GTCTCCACAGCCAAGTTCAGCTCAGATGGCTGAGCTCATTGCTCTCATAAAGCATGTAAGTTGGCAAAGATAAAG                           | -22.3      | - | Novel-mir-736-3p | - | TCATAAAGCATGTAAGTTGGCA   |
| Novel-mir-736-3 | GTCTCCACAGCCAAGTTCAGCTCAGATGGCTGAGCTCATTGCTCTCATAAAGCATGTAAGTTGGCAAAGATAAAG                           | -21.7      | - | Novel-mir-736-3p | - | TCATAAAGCATGTAAGTTGGCA   |
| Novel-mir-735   | CCAGTTCGGTTGCCAATGAGAAGGTGACCCTAAGGGATCAGTTTGTAGAAGGGTAAGCGATCCGGCACTG                                | -20.2      | - | Novel-mir-735-3p | - | TCAGTTTGTAGAAGGGTAAGCG   |
| Novel-mir-733   | AAAGGATTGCTGGCACAATTATCAAAGGACTTGTGAGAGACATTTTATGTGACTCAGTTGTAATGTGATGATGCTGTTTCCA<br>CC              | -19.7      | - | Novel-mir-733-3p | - | TCAGTTGTAATGTGATGATGCTG  |
| Novel-mir-732   | CAGCCAGCACTAAAGAGTATTTAAAGTCTTACTCCCAAGACAGTATCACGTTACCTCAGTTGGAATAACTTGTACTAGTGGTTGG<br>TGC          | -26.2      | - | Novel-mir-732-3p | - | TCAGTTGGAATAACTTGTACTAG  |
| Novel-mir-731   | AGCTGTGACTGTGCAAGCTCTAGCTGTTCTCTCGGGACAGATCAGTGAAGGACTGGAGAGCCGGTCCCTCCAGGG                           | -25        | - | Novel-mir-731-3p | - | TCAGTGAAGGACTGGAGAGCCGG  |
| Novel-mir-728   | GTTTACGCTACGGTTGACAAACATGTCATTCTTATTATAAGTAGCTTGGCTAATTGAATTCAGAGAATACCGGGTATCAGCAGGAG<br>CACAGAT     | -19.3      | - | Novel-mir-728-3p | - | TCAGAGAATACCGGGTATCAGCA  |
| Novel-mir-726   | CAGAAAGGGGCTCCGCTGACATTGTACATTCTGACTTTTTCTCAAATTTGACTTTAAAGTCAGAAAGTATGGGTACCTGTAGGGA<br>TCCAAGTTC    | -26        | - | Novel-mir-726-3p | - | TCAGAAAGTATGGGTACCTGTAGG |
| Novel-mir-724   | CCTTAGAAGGACACTGTTTTGGAGATAAAAGTAACTTCACTCAGTAATGGTGTTCACCTTATGACTTATGAGGATAGCCTTCA<br>TGCA           | -23.8      | - | Novel-mir-724-3p | - | TCACCTTATGACTTATGAGGATAG |
| Novel-mir-720   | AAATGTGCTGTGTTGACCAGTATACAGGGGATGATAGGGACATGGACATGCAGTCGATAAATTTCAATCAGGCTTTAAGACTCGTC<br>ATAGCACTGAA | -25.6      | - | Novel-mir-720-3p | - | TCAATCAGGCTTTAAGACTCGTCA |
| Novel-mir-719   | GGTAGTGGGTGGCGTCTGGCAGTGTCTGTTTCTGTTTGTAGCAAACGGTAATCAATACACAGTCTCAGCGTGCATCTCGTTTT                   | -22.7      | - | Novel-mir-719-3p | - | TCAATACACAGTCTCAGCGTGC   |

|                 |                                                                                                          |            |   |                  |   |                              |
|-----------------|----------------------------------------------------------------------------------------------------------|------------|---|------------------|---|------------------------------|
| Novel-mir-716   | CTGGTGCCTTTGACATGGTGGACCATGACATTTTGATATCTCACCTTCAAGATTTAGTGGGCATTCGTGGTGTGCCTTA                          | -18.2      | - | Novel-mir-716-3p | - | TCAAGATTTAGTGGGCATTCGTG      |
| Novel-mir-711   | GGCTGGAGATGGGCTGTTGCCAAAGACATGGATCTTCAGTTAGTAGTCAATAACCTCCTTATTGATGTCATTGCTTTATACCATAAA<br>AAGCA         | -19.6      | - | Novel-mir-711-3p | - | TATTGATGTCATTGCTTTATACC      |
| Novel-mir-709   | ATGTCTCTCTGTTGTCATTCTCCTCAACTTCTGCCTGAGAGAAAACGGGAAGATCTGTCTGCACAGTATTAAGTCTGGGAGGTCTGT<br>TCACGACTGCTTT | -20.1      | - | Novel-mir-709-3p | - | TATTAAGTCTGGGAGGTCTGTTC      |
| Novel-mir-708   | GCACAAGACTGTTACATCCCCAGTGTA AAAACCTAGCATATAAGTTATTAAGGCTGTCTGGGAGGGTGACGTCATGGGA                         | -20.7      | - | Novel-mir-708-3p | - | TATTAAGGCTGTCTGGGAGGGTG<br>A |
| Novel-mir-703   | ACCGTGTGGCCGTGTGAGGGAGGCGCCGGTAACAAAGTCAAGGGCTATATGAGACCAGGGCCGACTAGGCGTAGTAAGCGG                        | -24.5      | - | Novel-mir-703-3p | - | TATGAGACCAGGGCCGACTAGGC<br>G |
| Novel-mir-702   | ACTGAAAAGGCTCTCCAGGGGTGCTCAGCCTCATAGTCTACACTGCTTGGACAGAGCAGACTATCCGGTAGTCAACCTGGCGCT<br>GCTTTTCAG        | -36.9      | - | Novel-mir-702-3p | - | TATCGGTGATGTCACCTGGCGC       |
| Novel-mir-701   | AGAGAGGAGCGGGGTTAATTTCTGAAGATGATTTATAGACACCTGGTAGGTGTCGGGATTATCATCGTTGGGAGGACTGCTACTG<br>TTACCACT        | -25.1      | - | Novel-mir-701-3p | - | TATCATCGTTGGGAGGACTGCTA<br>C |
| Novel-mir-699   | AACAAATACAACATGACACATTTATTGACACAGAGGCATCAATTTGTGAAGTTGGTGAATATCAATCGATGAGCTGGACATTGTA<br>TGTGGA          | -20.1      | - | Novel-mir-699-3p | - | TATCAATCGAGTGAAGTGGACAT      |
| Novel-mir-698   | ACAATCTATAGCTTTAGGTTATGACATTGTGAAACATGTTTAAAAAACACACTTGCATGCGACTCTATAGAGGAAGAAGAACAGAGG<br>CTATGGAGATT   | -21.1<br>6 | - | Novel-mir-698-3p | - | TATAGAGGAAGAAGAACAGAGG<br>C  |
| Novel-mir-695   | GGCCGGAGCGTTGCAGAGCCAAACGGCATCACCTGGAAGTCCACCCCTTGTCCGATAGTGAATGCTGTTTTGGGGCGGGCCTCT<br>GGTG             | -35.8      | - | Novel-mir-695-3p | - | TAGTGAATGCTGTTTTGGGGCGG      |
| Novel-mir-693-1 | GTTGGAATACTGCAATGCTCTGATTTTGGAGTTCCTCAGTCTTTGCTCAACAACTCCAATTAGTCCAAAATGCAGCAGCTCGGCTG<br>CTATCTAA       | -26.1      | - | Novel-mir-693-3p | - | TAGTCCAAAATGCAGCAGCTCGG<br>C |
| Novel-mir-693-2 | GTTGGAATACTGCAATGCTCTGATTTTGGCGTTCCTCAGTCTTTGCTCAGCAAGCTCCAATTAGTCCAAAATGCAGCAGCTCGGCT<br>GCTATCTAA      | -25.1<br>4 | - | Novel-mir-693-3p | - | TAGTCCAAAATGCAGCAGCTCGG<br>C |
| Novel-mir-693-3 | GTTGGAATACTGCAATGCTCTGATTTTGGAGTTCCTCAGTCTTTGCTCAACAACTCCAATTAGTCCAAAATGCAGCAGCTCGGCTG<br>CTATCCAA       | -30.6      | - | Novel-mir-693-3p | - | TAGTCCAAAATGCAGCAGCTCGG<br>C |
| Novel-mir-692   | GTTTGGTTTTGGCGTATAGTGTGGTTTTGACTGGCGGCATCCACTGCAAGTGGATGATGATTGGTTCGATGAATGATTCCGGGTC<br>CGATA           | -26.3      | - | Novel-mir-692-3p | - | TAGTATTGGTCGATGAATGATTCC     |
| Novel-mir-690   | TATCATAAGGATCAGTACCATGGTATAGTCTATACCTGTGTGTGTAGGCTGTGAGATGGTATTGATCCTTATGCTA                             | -43.8      | - | Novel-mir-690-3p | - | TAGGCTGTGAGATGGTATTGAT       |
| Novel-mir-689   | TCTCTATCCTCCATGTCACAGAGGCAACCATACAGGAGGCGGGTAGGATGGTTCTGGAGGGGTGCCGAGGTAGAG                              | -26.8      | - | Novel-mir-689-3p | - | TAGGATGGTTCTGGAGGGGTGT<br>C  |
| Novel-mir-685   | ATGTGCGGGCCAGGATGGTGTGGCGGTCCAGGAGATGCTTTTAGCTCCTTAGGAAGGTGAGGAGACGTTGGGTGTTG<br>TAAGA                   | -28.1      | - | Novel-mir-685-3p | - | TAGGAAGGTGAGGAGACGTTGG<br>G  |
| Novel-mir-684   | AGGACCACATACATTTTACCCTTTTCTGAATGGCCTTCGGGGAACACCTTTACGAGACATAGCTTAGAGCAGGAACGTGGAAAC<br>TTGCTGTCT        | -18.3      | - | Novel-mir-684-3p | - | TAGCTTAGAGCAGGAACGTGGAA<br>G |
| Novel-mir-682   | CAAACAGGAACAAGGCCAGTTGCATATCAACGCTGCTGTCAAGGGTAGATGAGACATGAGCCAGAGGTGCCCTAAAAC                           | -20.1      | - | Novel-mir-682-3p | - | TAGATGAGACATGAGCCAGAGGT<br>G |
| Novel-mir-680   | TAATTAAGGTTGGGGCGACTGTTCAATTTCTGTTTGTGGCCCTAGACTATGGAATGCCCTGCCGTTGAACT                                  | -23.2      | - | Novel-mir-680-3p | - | TAGACTATGGAATGCCCTGC         |
| Novel-mir-676   | TGCCATACTGTCCATTTGTGCGGTGATGTGTACAGGAGCAGAGGCGCTACTTGCACCGGAGCCAGCAGGGTCTATGATGGC                        | -25.5      | - | Novel-mir-676-3p | - | TACTTGACCGGAGCCAGCAGGG<br>T  |
| Novel-mir-675   | ATTGACGTCACCTCCACTGATGTGTGTAGTATGGGTGACGAGTGGTCTGTCTACTTAGTATGGAGATATGTGGTTGTGCGTT<br>AA                 | -28.2      | - | Novel-mir-675-3p | - | TACTTAGTATGGAGATATGTGGT      |
| Novel-mir-675   | CTGACGTCACCTCCACTGATGTGTGTAGTATGGGTGACGAGTGGTCTGTCTACTTAGTATGGAGATATGTGGTTGTGCGTTA<br>A                  | -27.9      | - | Novel-mir-675-3p | - | TACTTAGTATGGAGATATGTGGT      |
| Novel-mir-674-1 | AACCAAGTTGTTCTGGAAGTCCGGAAGTCCAGACGGAACATTTTTAGTTCAGGCTCCTATACTGTGGAATGGTCTGCCATGGGAG<br>ATTAGATC        | -22.8      | - | Novel-mir-674-3p | - | TACTGTGGAATGGTCTGCCATGG<br>G |
| Novel-mir-674-2 | ACTCTATATTGTCCAGACTGACACACTGGGAAGACCGAGCTTTTTCAGTTCGGGCTCCTATACTGTGGAATGGTCTGCCATGGGAGA<br>TTAGATC       | -31.1      | - | Novel-mir-674-3p | - | TACTGTGGAATGGTCTGCCATGG<br>G |
| Novel-mir-670-1 | CCTGTCACCTGGAACGCCCTCACCTGTGCGGGGGCGGAGCTGCTGGAACACTGTGCCTGCTACCGAGGTACAGGGGGCG<br>GCCCGGTACGGAC         | -47.8      | - | Novel-mir-670-3p | - | TACCGAGGTACAGGGGGCGGCC<br>CG |
| Novel-mir-670-2 | CCTGTCACCTGGAATGACCCCTCACCTGTGCGGGGGCGGAGCTGCTGGAACACTGTGCCTGCTACCGAGGTACAGGGGGCG<br>GCCCGGTACGGAC       | -45.4      | - | Novel-mir-670-3p | - | TACCGAGGTACAGGGGGCGGCC<br>CG |
| Novel-mir-670-3 | CCTGTCGCTGGAACGCCCTCACCTGTACGGGGGGCGGAGCTGCTGTGCCTGCTACCGAGGTACAGGGGGCGGCCGGGTC<br>ACGGAC                | -45.5      | - | Novel-mir-670-3p | - | TACCGAGGTACAGGGGGCGGCC<br>CG |

|                 |                                                                                               |            |   |                  |   |                          |
|-----------------|-----------------------------------------------------------------------------------------------|------------|---|------------------|---|--------------------------|
| Novel-mir-670-4 | CCTCGTCGCCTGGAATGCACCCTCACCTGTGCGGGGGCGGAGCTGCTGGAACCTACCTGTGCCTGCTACCGAGGTACAGGGGGCCG        | -45.7      | - | Novel-mir-670-3p | - | TACCGAGGTACAGGGGGCGGCCG  |
| Novel-mir-667   | CCGCTGGAAGACTCAGTGTTTTGACCCGATAGCACAACTGCTAAAGTACATTGGCAACGAGACATCAAGTTTCACACGT               | -23.1<br>1 | - | Novel-mir-667-3p | - | TACATTGGCAACGAGACATCAAGG |
| Novel-mir-663   | AATTAGTCCACTTCAACGTGAGTCTCAGTGTTCAGACTCTTTATTTCTCGTCTCCATACAGAACAACCTCTCTCTGAGGTGACTA         | -21.3<br>2 | - | Novel-mir-663-3p | - | TACAGAACAACCTCTCTCTGAGG  |
| Novel-mir-662   | GGGGTGCAGATAAGGCGCACAGTACACTTGTGGCTGTCTGTGAAACGAGCATCGGGTACTCCTTTACACAACAGTCAAGGACACACCAGTGAT | -37.1      | - | Novel-mir-662-3p | - | TACACAACAGTCAAGGACA      |
| Novel-mir-659   | AGGGGGTAATGGATATTTGTCTTAAGTGTATAGCATTAAAGTCCGCGGTAATCAATGCAAGGACGAGGCGCCGCTCCA                | -21.4      | - | Novel-mir-659-3p | - | TAATCAATGCAAGGACGAGG     |
| Novel-mir-658   | AGAGGAGAGGTAATGGTATTTGTTTAAATGGTATGGCATTGATACCACAGTAATCAATACATGGACGAGGCCACCTCCTT              | -20.1      | - | Novel-mir-658-3p | - | TAATCAATACATGGACGAGG     |
| Novel-mir-657   | CACGTGCTTCCACAGTGGCTTGTCCCTGAACCTGGTCTGGTACAACGACTCAGGAATAAGTCTGGCTGCCCTGTGTCTATTT            | -24.7      | - | Novel-mir-657-3p | - | TAATAGTCTGGCTGCCCTGTGT   |
| Novel-mir-656   | ATTAGTATTGGTGACTGTCTTACTTAGTAGTGGCTTTGGCTGTATTTTAAAGTGAATTAATAAGTGATAAGGGACGGTAAC             | -25.3      | - | Novel-mir-656-3p | - | TAATAAGTGAAGGGACGGTAA    |
| Novel-mir-655-1 | CCATAGCTTTCCTTTGTACCGCACGTATGATGACTTGGGACCCATAAGTATGGTATCAGGTCCTAGAGGAAGCTTACA                | -21.9      | - | Novel-mir-655-3p | - | TAAGTATGGTATCAGGTCCTAGA  |
| Novel-mir-655-2 | CCATAGCTTTCCTTTGTACCGCACGTATGATGACTTGGGACCCATAAGTATGGTATCAGGTCCTAGAGGAAGCTTACA                | -24.6      | - | Novel-mir-655-3p | - | TAAGTATGGTATCAGGTCCTAGA  |
| Novel-mir-653   | ACAGTAGACTCCTCCGTACCTCATACTATTGATGGAGTCTCTGATCCTGATAAGATAGTGTAGTTTTGGCGGCTCATTACTGC           | -20.3      | - | Novel-mir-653-3p | - | TAAGTAGTGTAGTTTTGGCGGC   |
| Novel-mir-651-1 | ACTAGAGAGAAGAGTTGATGACTGTGACGACAGAGGGTGTAAATATTATTATTGACATGTATAACTGTAGACTTAGCCATAATGTT        | -18.1      | - | Novel-mir-651-3p | - | TAAGTGTAGACTTAGCCATAATGT |
| Novel-mir-651-2 | CACCAGAGAGAAAAGTTGATGACTGTGACGACAGAGGGTGTCAATATTATTATTACGACTGTATAACTGTAGACTTAGCCATAATG        | -18.1      | - | Novel-mir-651-3p | - | TAAGTGTAGACTTAGCCATAATGT |
| Novel-mir-649   | TGGAATGTGCTACAAGCCAGGTGTGTGAGTGTGTGATGTCAAGGCGGTAGATAACAATGAATACTGGACAATTGGTTGTCCG            | -18.5      | - | Novel-mir-649-3p | - | TAACAATGAATACTGGACAAT    |
| Novel-mir-647   | ATAATGCAATAACTCACTCACATTGCAACATTTAGACACTGGTAGGAGACTGTGATACCTTCCCTCTTAAATGGATAGTAGTGGACTG      | -25.6      | - | Novel-mir-647-3p | - | TAAATGGATAGTAGTGGACTGGT  |
| Novel-mir-644   | TTGGATCTGCACCTTGGGCATTTTTGTATGTCCGCTCGAACATGGAGGAGAGGGAGTAAAGAGAGACGACCCAGGTAGCTGACTT         | -25.2      | - | Novel-mir-644-3p | - | TAAAGAGAGACGACCCAGGTAG   |
| Novel-mir-642   | ATCCGGTGGAGTAGTAGTTGTATGGTTAGAATTACACCTGGGAGTAACTGTACAACCTTCTAGCTTTCCTTGGGA                   | -31.4      | - | Novel-mir-642-3p | - | GTTAACTGTACAACCTTCTAGC   |
| Novel-mir-639   | ATGGTCCGTGTTTATCAGATTGCTCATCATTTGTGCTGCATCAGGGTCCGTGTTACAGTATAATGTCTGTAGGTGGCGCTCGGCTT        | -21.3      | - | Novel-mir-639-3p | - | GTATAATGTCTGTAGGTGGC     |
| Novel-mir-636   | GCTTCAAGTATACTTTACTTTAACTTGCAGTTTCTATTGAAAGCTTTTTTCGGTCTTTTAAACAGTGAAGTCAAGAGATGAAGCGG        | -18.2      | - | Novel-mir-636-3p | - | GGAACCTCAGAGATGAAGCGGA   |
| Novel-mir-635   | TTCTGTCTTCCGGGAATGGAGTGAGAAGGGGGCCCTGGTAGAGCTCAAGATGGACAGAGTCCAGCTGTTGAGAAGTAGCTAGT           | -26.9      | - | Novel-mir-635-3p | - | GCTGTTGAGAAGTAGCTAGTGGC  |
| Novel-mir-634   | ACTGCTTTTTTCTCGCATTTTCCCGTGTGGTTAATGGCTCCTCTGCTACAGACTGAGACGGAGCTGGCACGAAGCAGC                | -24.2<br>1 | - | Novel-mir-634-3p | - | GCTACAGACTGAGACGGAGCTG   |
| Novel-mir-633-1 | TAACGCTCCAGCCACCTTTGAGAGATTGATGGGCGGGTCTCAAAGACATTTCCAGAACCCGCTGCGTAGTTTACCTGGACGACT          | -29.5<br>2 | - | Novel-mir-633-3p | - | GCGTAGTTTACCTGGACGACTTG  |
| Novel-mir-633-2 | TAACGCTCCAGCCACCTTTGAGAGATTGATGGGCGGGTCTCAAAGACATTTCCAGAACCCGCTGCGTAGTTTACCTGGACGACT          | -29.5<br>2 | - | Novel-mir-633-3p | - | GCGTAGTTTACCTGGACGACTTG  |
| Novel-mir-632   | TGCTGCCCTTAGAAACCAAGTGTGGGTGTGGCTGAAAACAGATATGGCGACCCATCCTTTGTTCTGAGGTCTGCA                   | -31.2<br>4 | - | Novel-mir-632-3p | - | GCGACCCATCCTTTGTTCTG     |
| Novel-mir-631-1 | TCTCTCTCTATCCACTCACCCCAACCGGTCGAGGCAGAAGGCCGCCACCAAGAGTCGGGGTCTGTGAGGTTTCT                    | -23.1      | - | Novel-mir-631-3p | - | GCCCACCAAGAGTCGGGGTCTGT  |
| Novel-mir-631-2 | TCTCTCTCTATCCACTCACCCCAACCGGTCGAGGCAGAAGGCCGCCACCAAGAGTCGGGGTCTGTGAGGTTTCT                    | -23.1      | - | Novel-mir-631-3p | - | GCCCACCAAGAGTCGGGGTCTGT  |
| Novel-mir-631-3 | TCTCTCTCTATCCACTCACCCCAACCGGTCGAGGCAGAAGGCCGCCACCAAGAGTCGGGGTCTGTGAGGTTTCT                    | -23.1      | - | Novel-mir-631-3p | - | GCCCACCAAGAGTCGGGGTCTGT  |
| Novel-mir-631-4 | TCTCTCTCTATCCACTCACCCCAACCGGTCGAGGCAGAAGGCCGCCACCAAGAGTCGGGGTCTGTGAGGTTTCT                    | -23.1      | - | Novel-mir-631-3p | - | GCCCACCAAGAGTCGGGGTCTGT  |

|                 |                                                                                                  |            |   |                  |   |                         |
|-----------------|--------------------------------------------------------------------------------------------------|------------|---|------------------|---|-------------------------|
| Novel-mir-631-5 | TCTCTCCTCTATCCACTCACCCCAACTGGTCGAGGCAGAAGGCCGCCACCAAGAGTCGGGGTCTGTCTCAGAGTTTCT                   | -24.8      | - | Novel-mir-631-3p | - | GCCCACCAAGAGTCGGGGTCTGT |
| Novel-mir-631-6 | TCTCTCCTCTATCCACTCAGCCGACTGGTCGAGGCAGAAGGCCGCCACCAAGAGTCGGGGTCTGTCTCAGAGTTTCT                    | -26.2      | - | Novel-mir-631-3p | - | GCCCACCAAGAGTCGGGGTCTGT |
| Novel-mir-631-7 | TCTTTCTCTATCCACTCACCCCAACCGGTCAAGGCAGAAGGCCGCCACCAAGAGTCGGGGTCTGTCTCAGAGTTTCT                    | -21.5      | - | Novel-mir-631-3p | - | GCCCACCAAGAGTCGGGGTCTGT |
| Novel-mir-631-8 | TGTCCTCTCTATCCACTCACCCCAACTGGTCGAGGCAGAAGGCTGCCACCAAGAGTCGGGGTCTGTCTCAGAGTTTCT                   | -28.4      | - | Novel-mir-631-3p | - | GCCCACCAAGAGTCGGGGTCTGT |
| Novel-mir-631-9 | TTTCTCCTCTCTCTTTATCCGCTCACCCACCCGGTTGAGGCAGAAGGTCGCCACCAAGAGTCGGGGTCTGTCTCAGAGTTTCT              | -20.3<br>4 | - | Novel-mir-631-3p | - | GCCCACCAAGAGTCGGGGTCTGT |
| Novel-mir-626-1 | CGAGTGATCCACTCTTACCTTTTGTAGACTGATGTGCTACGTTGACCGAGGATATCAGGACAAAAATATAATCACTGT                   | -20.4      | - | Novel-mir-626-3p | - | GAGGATATCAGGACAAAAATA   |
| Novel-mir-626-2 | CGAGTGATCCACTCTTACCTTTTGTAGACTGATGTGCTACGTTGACCGAGGATATCAGGACAAAAATATAATCATTGT                   | -20.4      | - | Novel-mir-626-3p | - | GAGGATATCAGGACAAAAATA   |
| Novel-mir-626-3 | AGACACCGCTCCATTACCTGCGTTCCACAGACTCCCATCTCCAAACGCCAAGCTGCTGAGGAAGTATGATCGGCATGGCAGCTAATGGC        | -20.6<br>7 | - | Novel-mir-625-3p | - | GAGGAAGTATGATCGGCATGGC  |
| Novel-mir-623   | GACCGGGCGTGTGTTTTGGGGTTTTGGGAGGGAGCAAGCAAGCCTGACAGAGACAGACAACCTCATGACTAAATAAGCTCTGAGACACTCAAAGT  | -25.4      | - | Novel-mir-623-3p | - | GACTAAATAAGCTCTGAGACACT |
| Novel-mir-621   | CATCGAGTCAGTTCTGTCTCATCTCACTGTCTGGTTGGCTCAGCAACCAACAGGACAAGTACAGACTCCAGAGGACAGCCAAACTGACT        | -24.3      | - | Novel-mir-621-3p | - | GACAAGTACAGACTCCAGAGGAC |
| Novel-mir-620-1 | GCAGTCTCTGGGACTGACTCCCTTACGTTGCCAGCCTTAGTGGCCGTTTGGGAACTGCAGGTTTTGGCACTTCCACATTGGCTTC            | -30        | - | Novel-mir-620-3p | - | GAAGTGCAGGTTTTGGCACTTCC |
| Novel-mir-620-2 | GGAATCTATGGGACTGACTTCCTTTGGAGCCAGCCTCAAGTGCCATTTGAGGAAGTGCAGGTTTTGGCACTTCCACACTGGATTTC           | -27.5      | - | Novel-mir-620-3p | - | GAAGTGCAGGTTTTGGCACTTCC |
| Novel-mir-615-1 | ACCCACCTTGACTATAGCTCGCCTGAGCAACAGGATAAGTACAACATATACCAACTGTATACAGAGACCTAAAGCACTGGGTGGGG           | -26.9      | - | Novel-mir-615-3p | - | CTGCTATACAGAGACCTAAAGCA |
| Novel-mir-615-2 | ACCCACCTTGACTATAGCTCGCCTGAGCAACAGGATAAGTACAACATATACCAACTGTATACAGAGACCTAAAGCACTGGGTGGGG           | -26.9      | - | Novel-mir-615-3p | - | CTGCTATACAGAGACCTAAAGCA |
| Novel-mir-615-3 | ACCCACCTTGACTATAGCTCGCCTGAGCAACAGGATAAGTACAACATATACCAACTGTATACAGAGACCTAAAGCACTGGGTGGGG           | -25.9      | - | Novel-mir-615-3p | - | CTGCTATACAGAGACCTAAAGCA |
| Novel-mir-615-4 | AGCCACCTCATCTTGACTATAGCTCGCCTTAGCAACATGATAAGTATAAACATATACAACCTGCTATACAGAGACCTAAAGCACTGGGTGGGG    | -23.8      | - | Novel-mir-615-3p | - | CTGCTATACAGAGACCTAAAGCA |
| Novel-mir-613   | GTCAGTGTAGTCCAAAGTGCTTACAGTGCAGGTAGTTTTAAGATCTACTGCAGTGAAGGCACCTTTCAGCACTGTTCTGA                 | -36.1      | - | Novel-mir-613-3p | - | CTGCAGTGAAGGCACCTTTCAGC |
| Novel-mir-609   | ACCTGCTCTCTAAAGAGCTGCGGTCCACAGCCAGCAGTCCCGCTGGCTCGTCTGGATCTGGGTCTGGAGGAGGAGGAGGAGGA              | -38.9      | - | Novel-mir-609-3p | - | CGTCTGGATCTGGGTCTGGAG   |
| Novel-mir-607   | CGAGCGGGTCTTTGTAAGCCGGATACGTCAGGCATTCTCACAGGATGGCGGACACTAACCTCTATACTTTGACCTCGTAGC                | -26.6      | - | Novel-mir-607-3p | - | CGGACACTAACCTCTATACTTTG |
| Novel-mir-605   | TTTGCCCACTCAAGTCGGTTACAATGACGCACTGCAGTCAGGTCGAGACCCGATAAGGATGACGAGCATGCAGATGAGCTTCCCTGAGACAGTTTC | -21.2      | - | Novel-mir-605-3p | - | CGAGCATGCAGATGAGCTTCCCT |
| Novel-mir-603   | CCCGTGTGGAGTTTACCCCGGTGAACGAGAGGGTCGCTTCCCTGCGCCTTTGGGTCGGGGATAGTCTTTCACTGC                      | -27.7      | - | Novel-mir-603-3p | - | CCTTTGGTGGGGATAGGT      |
| Novel-mir-602   | TGTTTATTATGGCGCACACATAGGAGGAGAGATGAATTCTGTACCCCTGCATGCGCGCCTGTCTGCCCTGTGTGTCTGTCTGTTCTGT         | -26.7      | - | Novel-mir-602-3p | - | CCTGTCTGCCCTGTGTGTGTCT  |
| Novel-mir-595   | TGTGTAGACATGGTCTAGTGGGAGTGCGGGTCATAAACAGAGAGTCTCCCCATGTCTCTTGCTCTGCTCGCTGCTGTGC                  | -26.6<br>3 | - | Novel-mir-595-3p | - | CCCATGTCTCTGCTCTGCCT    |
| Novel-mir-592   | TAGTGATCGGCTGGCTGTGATGCTCTGCTGGCTGAGTTTCTTTGAGGAGTTGACTGTCAGGATCGGCGCTGACGCT                     | -31.5      | - | Novel-mir-592-3p | - | CCAGATTGACTGTCAGGATCGG  |
| Novel-mir-590   | GGGCTTCTGCTGTATTAGCACGGGAGGAGTGCTAATTACCACTTCTCCCGGGAATCGCTATCAAGAGATT                           | -32.4      | - | Novel-mir-590-3p | - | CCACTTCTCCCGGGAATCGCTA  |
| Novel-mir-589   | CTCCTTTTCTCCTCTCTTCTCCTTTGTTGACTTTGTTCTTCCAGAGGACGCCACAAGGGAGAAGGAGAGGAGAAAGACAGA                | -41.7      | - | Novel-mir-589-3p | - | CCACAAGGGAGAAGGAGAGGA   |
| Novel-mir-586   | TTCTCTGCTAGCTCTTTGATTTTGGCTCCAGTTCTTGCACTGCCACACCATGGAGCATAGAAGTGCATGACGACGCTTTTGC               | -21.4      | - | Novel-mir-586-3p | - | CATGGAGCATAGAAGTGCATGAC |
| Novel-mir-583   | GTGTGAATTTCAAGTTGGTGGATCTTCCAGAAAGACCATGCAGAGCTCTACGGAGTGTCTAGGTTGCTACTGTTGGAAGCTGTGACTTCACA     | -24        | - | Novel-mir-583-3p | - | CAGGTTGCTACTGTTGGAAGCTG |



|                 |                                                                                                         |            |   |                  |   |                            |
|-----------------|---------------------------------------------------------------------------------------------------------|------------|---|------------------|---|----------------------------|
| Novel-mir-582   | CGGGTGTGGTGTGCTGCTGCTGGAACCTGGCCATCTGCGCTGCTGGGAAACAGTCTGACAGGTTAACATCAGGGTCCGCGAGG<br>GTCTGCATCC       | -29.1      | - | Novel-mir-582-3p | - | CAGGTTAACATCAGGGTCCGCGAGG  |
| Novel-mir-581   | ATCATCTGTTGGTACAGCTATTAGTACGCTGGGTAGTCTCAGTATCCAGGTAAGTACAGGCGGACTGATTAATGTGAA                          | -39.2      | - | Novel-mir-581-3p | - | CAGGTAAGTACAGGCGGACTGAG    |
| Novel-mir-573   | CTCTACGCCCCAGAAGTCTGCACTGGGTCATGGGGCAGCAGGAGCTGGTCACTATGGGAACTCCAAGACGGTGAGGCGACTTA                     | -29.1      | - | Novel-mir-573-3p | - | CACATGGGAACTCCAAGACGGTG    |
| Novel-mir-571   | TGGGGAATCCAGATGCTGCTGCAGTTGCTGTTGTTTGGATGAGACACACCAGGATCAGTAGACGGTGTGCTAGCTTGCCC                        | -21.5      | - | Novel-mir-571-3p | - | CACAGGATCAGTAGACGGTGTGC    |
| Novel-mir-569   | TCCCTGTTTTCTGGGGCTATCGATGGACTTGGTGCAGTCGCACAGTCCAGCAGCACCACACATTGATTGGCCATGGGCTCG<br>CGGGGGG            | -38.1      | - | Novel-mir-569-3p | - | CACACATTGATTGGCCATGGGC     |
| Novel-mir-565   | GGCAAGAGGCTGAGCTGTTTCTGCCCTGGCAGGATGAGCAGTGGGAACTAGGGACAAGTCAAGCAAGAACCAGGCAGACCAAG<br>ACC              | -25.8      | - | Novel-mir-565-3p | - | CAAGTCAGGCAAGAACCAGGCAG    |
| Novel-mir-564   | TAGTTGTCTATATGTACCCTGTAGAACCAGAAATTTGTGTAAGTCCAACAGTCGCAAACACGTCTCTACAGGAATACATGGGCAACT                 | -32.7      | - | Novel-mir-564-3p | - | CAAATACGTCTCTACAGGAATAC    |
| Novel-mir-560   | CACATCGATACACTGCTTTGATAGATGTGACAGAAACAGACTGAATCTGTGTTCACTAGTCTACAGTATGTAACACTGAACAAGCA<br>GGGTGTCTATGGC | -26.7      | - | Novel-mir-560-3p | - | ATGTAACACTGAACAAGCAGGAG    |
| Novel-mir-557   | GAACACAAAGTGTGCTTAAAGAGTTCATCAAAGGCCGCAATGATGTAGTTACCTGGCATGGGATGAGCTTCTGTCCAGCACAA<br>GTAGAA           | -27.6      | - | Novel-mir-557-3p | - | ATGGGATGAGCTTCTGTCCAGCA    |
| Novel-mir-555   | CCATACCAGGGTTAGAGTTCAGCCTCAGCATTCTTGTGTGGTCACTTCTATATTTATGGAATGCTCAAGCTCATGTTACCTTCGTA<br>TG            | -27.2      | - | Novel-mir-555-3p | - | ATGGAATGCTCAAGCTCATGTTA    |
| Novel-mir-553   | CGGCATCAAGCTACGGTCTAAAGAAAGATTCAAAGAGCCAGTCCCATGAAACTATCGTTGTAGAGGTTTTTCGCCCGTGTCTG<br>CCT              | -23.4      | - | Novel-mir-553-3p | - | ATCGTTGTAGAGGTTTTTCGCCCG   |
| Novel-mir-552   | AGCGTGAATCTTTTTCAGTAAAAGTCAAGCTCCAGTGTGTGACAGATTCTGTTAAAGGGAATAAAAAGCATGGTTGTCAAGGGCA<br>GTGCGGCG       | -21.1      | - | Novel-mir-552-3p | - | ATAAAAAGCATGGTTGTCAAGGG    |
| Novel-mir-551   | GGCACCCGGGCGATGACGTCACCTCCGGTTTAGCGATTTCCCGTTAGTAAGAAAGATGGCGGACGTAAGGCTCTTTTTT                         | -19.4      | - | Novel-mir-551-3p | - | AGTAAGAAAGATGGCGGACGTAAG   |
| Novel-mir-550   | TCGGCCACGCTCACATGCAGCAGTCACTCCACATATGCACATGTCAGCGTTGCAGCAGCAGCAGAAGGGAGTGGCTCTGCAGC<br>AGAAGGTACAACAGAT | -33.5      | - | Novel-mir-550-3p | - | AGGGAGTGGCTCTGCAGCAGAAAG   |
| Novel-mir-549   | AGAGATGATGATGTTGATGTTCTTTTAGGAGGGACCAGGATGGACAGGATTAGGAATGAACACATCAGACGGACAGCTC                         | -18.4      | - | Novel-mir-549-3p | - | AGGATTAGGAATGAACACATCAGAA  |
| Novel-mir-544   | TATAGTGTACCAGAGAGGCCACTGTCAAAGTGTGATAAAAGATGTGCGAAGTAGAGTTCCAAGATGGCGTTACTGAACACACA<br>AGT              | -18.5      | - | Novel-mir-544-3p | - | AGAGTTCCAAGATGGCGTTACTGAA  |
| Novel-mir-543   | AGAGACAAACGGATGCAGGTGAGATATCCATGGCTGCCACTCGGCAGAGTATGGAACCACTGGCATTCTGCTGTGGAT                          | -28.1      | - | Novel-mir-543-3p | - | AGAGTATGGAACCACTGGCATTCT   |
| Novel-mir-542   | GGCTGCTAAGACTATGTTGTGCTCTTATGTTATCCACAGGGCAGAGATAACAGATACACTGCTGGTCACTGCG                               | -18.2      | - | Novel-mir-542-3p | - | AGAGATAACAGATACACTGCTGCT   |
| Novel-mir-541   | CAGGGCTCGACCCAGGCAGACACTCCTCATTCTGTTATCATATGAGACTGAAGACGTGTCTGTGGAGTGGGCCCT                             | -33.3      | - | Novel-mir-541-3p | - | AGACTGAAGACGTGTCTGTGGAG    |
| Novel-mir-540   | AGGTGCATCACTGTGTGGTACGGAGCCTGTACTGCCTCTGCAGAAGGACTCTGCAACACATAGTGAATACAGCC                              | -32.6      | - | Novel-mir-540-3p | - | AGAAGGACTCTGCAACACATAGTGA  |
| Novel-mir-539   | GGCTGCATCACTGTGTGGTATGGAGCCTGTACTGCCTCTGCAGAAGGACTCTGCAACACATAGTGAACACAGC                               | -32.4      | - | Novel-mir-539-3p | - | AGAAGGACTCTGCAACACATAGTGA  |
| Novel-mir-538-1 | ACCTCAAGTGTATACCAGAGCTCAGAGGGGTGAGGTGTGGGCCCTCAGTCAACCACTACTCAAGGAACACAGGGTTGTTGCAGAG<br>CA             | -22.9      | - | Novel-mir-538-3p | - | ACTTACTCAAGGAACACAGGGTTG   |
| Novel-mir-538-2 | TCAAGTGTATTACTAGAGCTCAGAGGGGTGAGGTGTGAGGTGTGGGCCCTCAGTCAACCACTACTCAAGGAACACAGGGTTGTTG<br>CACAGAA        | -30.1      | - | Novel-mir-538-3p | - | ACTTACTCAAGGAACACAGGGTTG   |
| Novel-mir-536   | ATCCTGACTAAATGTTAGCTGGACGGCTCAGATCCGTCATAGTCACTATTGAGCGACACACAGACCTGTAGCATTCCAGGCAGAG<br>GATGTCACAGA    | -25.8      | - | Novel-mir-536-3p | - | ACCTGTAGCATTCCAGGCAGAGAG   |
| Novel-mir-534   | GAAAGGTAAAGAGTGTACATGGACATTTCAACTTAAATCTCAGAGTTGATTGAACCAAGTCACTTTGATGCCACTGCAAAAGCTGA<br>AT            | -18.5<br>1 | - | Novel-mir-534-3p | - | ACCAAAGTCACTTTGATGCCACTGCA |
| Novel-mir-531-1 | CCAGCCAGCTAACCAATGTGCAGACTACTGTACAACCACTACTTCTGAACAGGTAGTCTGAACACTGGGCGAGGGGGCTG                        | -38.2      | - | Novel-mir-531-3p | - | ACAGGTAGTCTGAACACTGGGC     |
| Novel-mir-531-2 | TCCAGCCAGCTAACCAATGTGCAGACTACTGTTCACTGTAGCCTGATGAACAGGTAGTCTGAACACTGGGCGAGGGGGGG                        | -42.5      | - | Novel-mir-531-3p | - | ACAGGTAGTCTGAACACTGGGC     |
| Novel-mir-6-2   | GGCATTATGCCAGCAGCGGACCTGAGTGGAGACGCCAGTGCAGGGCACAGGGTGGTAAAGAAATCTCTTCAGGACTGTG<br>CATGCCAAGGGATAA      | -36.1      | - | Novel-mir-6-5p   | - | AATCTCTTCAGGACTGTGCATGCG   |

|                 |                                                                                                      |            |   |                   |   |                          |
|-----------------|------------------------------------------------------------------------------------------------------|------------|---|-------------------|---|--------------------------|
| Novel-mir-528   | TGGTGCATCACTATGTGGTACGGAGCCTGTAAGTCCCTCTGCAGAAAGACTCTGCAGCACATAGTTAATACAGCCA                         | -35.5      | - | Novel-mir-528-3p  | - | AAGGACTCTGCAGCACATAGTT   |
| Novel-mir-526   | CAAACACTCAGTTCTATGTTTTCGTGAAAGGATGGTGTGCAGCCTATTGTGAACCTTCTGAAGAACAAAAGAGCTGGTTCCG                   | -21.4      | - | Novel-mir-526-3p  | - | AACCTTCTGAAGAACAAAAG     |
| Novel-mir-525   | ACTACGGGCCCTTAATCTTTGGCCCCAGTCTTTGGCTGGTGCCTGGATGAAGGGCAAGGGGAACATGTGGAACAGAGACAGTGT                 | -33.6      | - | Novel-mir-525-3p  | - | AACATGTGGAACAGAGACAG     |
| Novel-mir-524   | TATTATTTGTGCGTTGCCACAACCTGCTTGACTGTAAAAGACAAAACAGTAGTCAGTTTCAGGAGCGCACTCTTTGCC                       | -18.5      | - | Novel-mir-524-3p  | - | AACAGTAGTCAGTTTCAGGAGCGC |
| Novel-mir-580   | GATGATGAACCGTTTCCCTGTGAGTTCAAGCTGGCCATGTGACCTGATGAAGGCCAGGGGTGATGATGCTGAGTAAGGTTTCGCATG              | -23.8<br>6 | - | Novel-mir-580-3p  | - | CAGGGGTGATGATGCTGAGTAAG  |
| Novel-mir-803   | AGGTCTAGACCTTTGTAAGGTGCTGAGATTACTTTGTTAAGCTTTGCAGCTTCATCAGCGTTGAACCTCGGGAAGAATTTGACGGA<br>GGCAATAATA | -26.5      | - | Novel-mir-803-3p  | - | TGAACTCGGGAAGAATTTGACGGA |
| Novel-mir-548-1 | CCTAGGGCTGAATGGGAGGACCCAGAGCGCATTGCTGTCTGCAGGAGTTGATGGGTGTTCCAAATCTTATG                              | -22.3      | - | Novel-mir-548-3p  | - | AGGAGTTGATGGGTGTTCC      |
| Novel-mir-548-2 | TGAACGAGAGACCAGAGCGCATTGCTGTCTGCAGGAGTTGATGGGTGTTCCAAATCTGATG                                        | -19.9      | - | Novel-mir-548-3p  | - | AGGAGTTGATGGGTGTTCC      |
| Novel-mir-877   | GAGGGCAGCCCCGATGCCAGGCAGGAGTCCGTGTTGCCGTGGCGCTGCTGCTGAAGACCGGCTGGGACCTGGGCTGCAGG<br>G                | -38.7      | - | Novel-mir-877-3p  | - | TGCTGAAGACCGGCTGGGACCTG  |
| Novel-mir-573   | CTCTCCGCCAGAACTCTGCACTGGGTCCATGGGGCAGCAGGAGCTGGTCACTATGGAACTCCAAGACGGTGAGGCGGCTTA                    | -31.3      | - | Novel-mir-573-3p  | - | CACATGGAACTCCAAGACGGTG   |
| Novel-mir-679-1 | TATGCATTTGAGCACCTTCTCACTCTACCTAGGAGGGGCCAACACTAGACGAGTTAGAATGAGGGGTGCTGGGTTTCGT                      | -29.5      | - | Novel-mir-679-3p  | - | TAGACGAGTTAGAATGAGGGGTG  |
| Novel-mir-679-2 | TATTATTGATGACCTTCTCACTCTACCTAGGAGGGGCCAACACTAGACGAGTTAGAATGAGGGGTGCTGGGTTTCGT                        | -25.4      | - | Novel-mir-679-3p  | - | TAGACGAGTTAGAATGAGGGGTG  |
| Novel-mir-848   | GCTATGTGAAACAGGGCCGGCTAGGCGTAGTCAGCGGCCAAGGAGACCGGGTGACTGATGTAAGGGCTGGACTGAGCA<br>CAGGGA             | -31.2      | - | Novel-mir-848-3p  | - | TGATGTAAGGGCTGGACTG      |
| Novel-mir-916   | ATTGTGTCAGTTCTGATGTGCATGAGCGGCTTCTCAGAGGGAAGTAAACGATGTGTGAGTGTGACTGGTGAGCAGAAACACC<br>AT             | -20.6      | - | Novel-mir-916-3p  | - | TGTGAGTGTGACTGGTGAGC     |
| Novel-mir-979   | AACCGATTTACAACCTGTGAATAGATGTTTTCTGTTAGCCCTCAGAGGTGTACATATTTCTGAAGCTGAGTGAAGGAGAGATCAT<br>TGGTA       | -22.6      | - | Novel-mir-979-3p  | - | TTCTGAAGCTGAGTGAAGGAGA   |
| Novel-mir-554   | AAGTGCTCTACTATGAGAACTGAATCCATAGATGGTGGCTACTTCAAGTGTATCTATGGGCTCAGTTCTTTTGGCATGGTACT                  | -37.2      | - | Novel-mir-554-3p  | - | ATCTATGGGCTCAGTTCTTTTGG  |
| Novel-mir-481-2 | AACATCACACGTCCAGATCTCTCTACCACCAAACCTGCGCGCAGGCAGCTTGGAAAGATGAAAGACCTGGACCAAGAAACCT                   | -21        | - | Novel-mir-481-5p  | - | TTGGAAAGATGAAAGACCTGGAC  |
| Novel-mir-481-3 | AACATCACACGTCCAGATCTCTCTACTACCAAACCTGCGCGCAGGCAGCTTGGAAAGATGAAAGACCTGGACCAAGAAACCT                   | -21.7      | - | Novel-mir-481-5p  | - | TTGGAAAGATGAAAGACCTGGAC  |
| Novel-mir-481-4 | AACATCACATGTCCAGATCTCTCTACCACCAAACCTGCGCGCAGGCAGCTTGGAAAGATGAAAGACCTGGACCAAGAAACCT                   | -18        | - | Novel-mir-481-5p  | - | TTGGAAAGATGAAAGACCTGGAC  |
| Novel-mir-759   | AGCCTCGTATTTCACTGGATGCTGGTGCATGAGACCATAGATGAGTTATTAGCTTGGTTTAGCTCTACATGCACGGACATCCTTGACTC<br>GTGTG   | -22.5      | - | Novel-mir-759-3p  | - | TCTACATGCACGGACATCCTT    |
| Novel-mir-725-1 | ACAAAGGCCCTTGTGGAGAGAGCAAAATTCAGTGTGAATCGAAAGAAATTTCACTTGATAGGACCTCTGCACGCAGATATTCGT                 | -19.2      | - | Novel-mir-725-3p  | - | TCACCTTGATAGGACCTCTGCACG |
| Novel-mir-725-2 | ACAAAGGCCCTTGTGGAGAGAGCAAAATTCAGTGTGAATCGAAAGAAATTTCACTTGATAGGACCTCTGCACGCAGATATTCCTT                | -19.2      | - | Novel-mir-725-3p  | - | TCACCTTGATAGGACCTCTGCACG |
| Novel-mir-718   | TGGTCACTCTCTGGCATTACCGCGTGCCTTAATTGTATGGACATTTAAATCAAGGTCGCTGTGAACACGAGGAGAGACGA                     | -29.1      | - | Novel-mir-718-3p  | - | TCAAGGTCGCTGTGAACACGA    |
| Novel-mir-738   | CTGCAGTGTGCCACATTAAGTGTGCTGGGGCCCTACTGCAGGTTCTGGGTAAGGGGTATCAGTGTGGCTGGCATGGGTAAC<br>C               | -27.2      | - | Novel-mir-738-3p  | - | TCATCAGTGTGGCTGGCATGGG   |
| Novel-mir-956   | GGCATCTGTGTTTTATCCTCGTCCCACTCTGTTGTGTCTGTAGTATTTCTTCTATTATACTAGACACACAAGAACAATCGGAGC                 | -19.4<br>4 | - | Novel-mir-956-3p  | - | TTATACTAGACACACAAGAA     |
| Novel-mir-922   | ATGGACAAGTCCGCTCTGAGTCCCCAGCTCTGGCTTCTTTATGGAAGGTGTGTGACAGGGATTGAGGAGATCTTCAAAGT                     | -32.7      | - | Novel-mir-922-3p  | - | TGTGTGACAGGGATTGAGGAGA   |
| Novel-mir-1011  | TGCGTCGTTTTGCTGGCCAGTTGCTCTGTGTTCTCACACACAGCTTGAACACATTGTCAGCTGCAGTTGCTTCCCTT                        | -18.7      | - | Novel-mir-1011-3p | - | TTGTAACACATTGTCAGCTGCAG  |
| Novel-mir-1000  | CTTGGGAGGTCTGCTCTCGCTATGGCCCGTTGCATTGCTCCCTTATAGGGAGGCCAGAAGCTTCTCCATT                               | -27.5      | - | Novel-mir-1000-3p | - | TTGCTTTATAGGGAGGCCAGAAG  |

|                   |                                                                                                           |            |   |                  |   |                              |
|-------------------|-----------------------------------------------------------------------------------------------------------|------------|---|------------------|---|------------------------------|
| Novel-mir-978     | GGGTGCCGTGAATACGAAACACATGCTGAACCAGGAGCTGGGTGTTTCTAGAGCAGTGGGGAGTTGTGGAAGGGCAAGA                           | -23.4      | - | Novel-mir-978-3p | - | TTCTAGAGCAGTGGGGAGTTGTG<br>G |
| Novel-mir-766     | CGGGAGCAGGGTCTGTAGGGCTTTGGCGGTCCAGCCAAAGGGGCGAGGATCTCATCGGCACACTGTAGACCTGGTACCCT                          | -33.2      | - | Novel-mir-766-3p | - | TCTCATCGGCACACTGTAGAC        |
| Novel-mir-906     | CGGCCCCCATATACATCCAACAATGGCAGTGTATCAGAGAACTTTGTAGGTGATGGTGGGAGTTGACTTGAAGTCTGATGTG<br>TAGAGGGTGAACAG      | -26.9      | - | Novel-mir-906-3p | - | TGACTTGAAGTCTGATGTGAGA       |
| Novel-mir-454-2   | GTGGATGAAAGAGAAAGCACCACATTTGGGAGTGGGTGTACATCAGTACACAGGTTAAAAAGCCGGTTATCAGGTTGGGAGCTGT<br>CGAGCATGCAGCTGC  | -25.9      | - | Novel-mir-454-5p | - | TTATCAGGTTGGGAGCTGTCGAG<br>C |
| Novel-mir-390-2   | CTGCAGATATAATAAATAATCATCTGCATACAGGCAAACCTTATGTTGAAGTTAGTATCTTGTATTCCCTTTGATGCTATTATTCTGTCA<br>TATT        | -18.4      | - | Novel-mir-390-5p | - | TGTATTCCCTTTGATGCTATTATT     |
| Novel-mir-677     | GCTCTTGGCTGAGCGGGACACACTAGCTTTGACGCCGTGGATAAGCATTCTTTAATAAAGTCCCTTTGAGAAAATGAACGTCCACTC<br>CTGGCAATTAGAGC | -27.3      | - | Novel-mir-677-3p | - | TAGAAAATGAACGTCCACTCCTG<br>G |
| Novel-mir-900     | GAGAACTGTACAGCCAACCTGTAGGCCAGTAAAGCAGAGAGGAAGGTGCATATCCCAATCCCTCTGGTGTCTGCAGTGGATGGC<br>TAGTTGTTTT        | -29.2      | - | Novel-mir-900-3p | - | TGGTGTCTGCAGTGGATGGC         |
| Novel-mir-347-2   | GGATGGTAAACGGCTCCAGAAACGGGGAGACTATTTGGGCATGCCCTTTGATGGGAATGTGGTGCCGAGAGCCAAACCTG<br>TT                    | -31.6      | - | Novel-mir-347-5p | - | TGGGAATGTGGTGCCGAGAG<br>C    |
| Novel-mir-837-1   | TAACACCAGACATACAGAAAATGGTGAAGAAGGGAAATACCAGTTTTCCCAATGAGTCTTTCAAATGTTGAGTTATCGATCC                        | -18.3      | - | Novel-mir-837-3p | - | TGAGTCTTTCAAATGTTGATG        |
| Novel-mir-837-2   | TAACACCAGACATACAGAAAATGGTGAAGAAGGGAAATACCAGTTTTCCCACTGAGTCTTTCAAATGTTGAGTTATCGATCC                        | -18.3      | - | Novel-mir-837-3p | - | TGAGTCTTTCAAATGTTGATG        |
| Novel-mir-837-3   | TAACACCAGACATACAGAAAATGGTGAAGAAGGGAAATACCAGTTTTCCCACTGAGTCTTTCAAATGTTGAGTTATCGATCC                        | -18.6      | - | Novel-mir-837-3p | - | TGAGTCTTTCAAATGTTGATG        |
| Novel-mir-712     | GCAGGCAGAATGGGCTCAGGGGTATCTTACAGAGTGGGGGTTATATTTGTCGGGAGAAGGCATCTGGTTTCTGGTTG                             | -19.1      | - | Novel-mir-712-3p | - | TATTGTCGGGAGAAGGCATCTGG      |
| Novel-mir-710     | ACTTTAACTGTACTGCTGTTAGCCACAAGGCTGATATTTCTGCATGTATTCAAATATTATTCGGGTGCTGATAGAGGCTAGTTTGCCT                  | -20.8      | - | Novel-mir-710-3p | - | TATTATTCGGGTGCTGATAGAGG<br>C |
| Novel-mir-706     | GCTATCATGCCCGCTTCTTCCAAGTCCCATAGATGGCCTCTGTCTATGGGACTTGAGAAAGCAGCAGGAGGGTGG                               | -55.4      | - | Novel-mir-706-3p | - | TATGGGACTTGAGAAAGACGC        |
| Novel-mir-855     | CCTTCTCTCGGAACAGTTCTTTAGCACAAGACTGTTACATCCCAGTGAAGAAGGAGCGTTACTGTAGGTCGTCC                                | -20.5<br>7 | - | Novel-mir-855-3p | - | TGCAAGAAGGAGCGTTACTGT        |
| Novel-mir-837-1   | TAACACCAGACATACAGAAAATGGTGAAGAAGGGAAATACCAGTTTTCCCACTGAGTCTTTCAAATGTTGAGTTATCAATTC                        | -18.3      | - | Novel-mir-837-3p | - | TGAGTCTTTCAAATGTTGATG        |
| Novel-mir-837-2   | TAACACCAGACATACAGAAAATGGTGAAGAAGGGAAATACCAGTTTTCCCACTGAGTCTTTCAAATGTTGAGTTATCGATCT                        | -18.3      | - | Novel-mir-837-3p | - | TGAGTCTTTCAAATGTTGATG        |
| Novel-mir-837-3   | TAACGCCAGACATACAGAAAATGGTGAAGAAGGGAAATACCAGTTTTCCCACTGAGTCTTTCAAATGTTGAGTTATCAATAC                        | -18.3      | - | Novel-mir-837-3p | - | TGAGTCTTTCAAATGTTGATG        |
| Novel-mir-791     | TCTGTGTCTAGGAGGAATGGCAGGTTGGGGGCTGGGGGGTGAAGTAAAGGAGACTCCGTCAAAGCCTTCTTACAGCAATCTAAAGG<br>CATGGTCGCATT    | -28.7      | - | Novel-mir-791-3p | - | TCTTACAGCAATCTAAAGGCA        |
| Novel-mir-762-1   | TGGGCCAGTCGAGGCTGTAGCCCTAGCAGCCAAGGGGACATATAATCTATCTGGTGGTCCACCCCTGGATTGGGTTCC                            | -34.4      | - | Novel-mir-762-3p | - | TCTATCTGGTGGTCCACCCCTG<br>G  |
| Novel-mir-762-2   | TGGGCCAGTTGAGGCTGTGGCCCTAGCAGCCTGGGGGACGTATAATCTATCTGGTGGTCCACCCCTGGATCGGGTTCC                            | -34.2      | - | Novel-mir-762-3p | - | TCTATCTGGTGGTCCACCCCTG<br>G  |
| Novel-mir-762-3   | TGGGTCCAGTCGAGGCTGAACCCCTAGCAGCCAAGGGGACGTATAATCTATCTGGTGGTCCACCCCTGGATCGGGTTCC                           | -27.6      | - | Novel-mir-762-3p | - | TCTATCTGGTGGTCCACCCCTG<br>G  |
| Novel-mir-710     | CGGACTTTAACTGTACTGCTGTTAGCCACAAGGCTGATATTTCTGCATGTATTCTAATATTATTCGGGTGCTGATAGAGGCTAGTTT<br>GCCCT          | -22.8      | - | Novel-mir-710-3p | - | TATTATTCGGGTGCTGATAGAGG<br>C |
| Novel-mir-608     | ACCTGCTCTCTAAAAGAGCTCGGTCACAGCCCAAGGAGCAGTCCGCTGGCTCGTCTGGATCTGGGCTGGAGGAGGAGGAG<br>G                     | -37.8      | - | Novel-mir-608-3p | - | CGTCTGGATCTGGTCTGGAG         |
| Novel-mir-756     | TCCATCTGTGAAGAAGTTTCATTCTGGAATGAAGTGAAGAGAAAGCTTCTTCTCCTCGTCTGTGGAAGAGAGGTTTGTG<br>GTCGTGGC               | -23.1      | - | Novel-mir-756-3p | - | TGGTCTGTGGAAGAGAGGTTTGT<br>T |
| Novel-mir-687     | TTTCCGAGTCTGGGATCTTTGTCTTTCCGCCTGCAGTATCCAACACAGCCAGTGCATACCATAGACGGTAGATAATGGCTTAG<br>CTGGTCATCTG        | -24        | - | Novel-mir-687-3p | - | TAGGACGGTAGATAATGGCTTAG<br>C |
| Novel-mir-664     | CGGTAGCCATAATGCTGGCCTGGTCCCTTCAGCTCTTTGTGGATGGCAGCAGTACAGTAGCAAGAGGAGGAGTCAATTTTTTACC                     | -19.7      | - | Novel-mir-664-3p | - | TACAGTAGCAAGAGGAGAGTCA       |
| Novel-mir-102-1-1 | GCAGAAAGGGCAAAGAGAGAGGATGGGATACTGCTCATGTTTGTGTTTCTCACTTTGCCCTTAAACGG                                      | -25.2      | - | Novel-mir-102-3p | - | TTGTTTTGATTCTCACTTTG         |

|                      |                                                                                                         |            |   |                       |   |                              |
|----------------------|---------------------------------------------------------------------------------------------------------|------------|---|-----------------------|---|------------------------------|
| Novel-mir-102<br>1-2 | GCAGGAGGGGCAAAGAGAAGCAGAGGGGAGAAGAGGAGGGGATACTGCTTGGGTTTGTTTGATTCTCACTTTGCCCTTAACGG                     | -29.5      | - | Novel-mir-1021<br>-3p | - | TTGTTTTGATTCTCACTTTG         |
| Novel-mir-102<br>1-3 | GCAGGAGGGGCAAAGAGGAGCAGAGGGGAGAAGAGGAGGGGATACTGTTGAGTTTGTGTTGATTCTCACTTTGCCCTTAATGG                     | -29.5      | - | Novel-mir-1021<br>-3p | - | TTGTTTTGATTCTCACTTTG         |
| Novel-mir-928<br>-1  | CGAAATGCAGCAGAGGAGGCAGCAGTAAATGGCTCCTGTGTTGATGTGCTGGACCCCGTCTGCCCTGTTAACTGTACCTTCTCT                    | -29.9      | - | Novel-mir-928-<br>3p  | - | TGTTAACTGTACCTTCTCTC         |
| Novel-mir-928<br>-2  | CGAAATGCAGCAGAGGAGGCATCAGTAAATACCTCCTGTGTTGATGTGCTGGACCCCGTCTGCCCTGTTAACTGTACCTTCTCTC                   | -27.5      | - | Novel-mir-928-<br>3p  | - | TGTTAACTGTACCTTCTCTC         |
| Novel-mir-975        | TCCCTCAAGGACCAGTTCACCACAGCCCTCGTACTCCTCAACCTGACCCCTCACTGCAGTTCGTGGTAGAGGTGGACGCGTCCAA<br>CACTGGGG       | -26.6<br>1 | - | Novel-mir-975-<br>3p  | - | TTCGTGGTAGAGGTGGACGCGTC<br>C |
| Novel-mir-851        | AAGGTCCACAGTTCGTGCTGAAATGCGATCGAAACCAGGTGTGTGTGTGTCATGTGATTTCCAGGCGGCAGCTGAACAATG<br>GGTCTT             | -29        | - | Novel-mir-851-<br>3p  | - | TGATTTCCAGGCGGCAGCTGAA<br>C  |
| Novel-mir-669        | TACCAGTGCCAGGGCTCTGTTTCTGATCTCTTTGGTTTTCAAAGAGTATACCATAGGATTGATGCAGGGTGGGGTCAAGAT                       | -26.4      | - | Novel-mir-669-<br>3p  | - | TACCATAGGATTGATGCAGGGTG<br>G |
| Novel-mir-660        | GAGGGGTAATGGATATTTGTCCTAACTGTTATAGCATTAAAGTCCGCGTAATCAATGCAAGGACGAGGCGCGCTCCAT                          | -21.4      | - | Novel-mir-660-<br>3p  | - | TAATCAATGCAAGGACGAGGGC       |
| Novel-mir-101<br>4-1 | TGGCCTAGATCTGATTGCAGCCACATGACTGACACATGTAGGATGGCACACCTCTACATTGTCAAGTCTGGAGCTGTAACACATCAA<br>AACAT        | -31.9      | - | Novel-mir-1014<br>-3p | - | TTGTCAAGTCTGGAGCTGTAACA<br>C |
| Novel-mir-101<br>4-2 | TGGCCTAGATCTGATTGCAGCCACATGACTGACACATGTAGGATGGCACACCTCTACATTGTCAAGTCTGGAGCTGTAACACATCAA<br>AACCT        | -32.2      | - | Novel-mir-1014<br>-3p | - | TTGTCAAGTCTGGAGCTGTAACA<br>C |
| Novel-mir-928        | AAAATGCAGCAGAGGAAGTGTCAAGTAAACCTCCTGTGTTGATGTGCTGGACCTCGTATGCTGTGTTAACTGTACCTTCTCTCTC<br>CTCAGATC       | -23.5      | - | Novel-mir-928-<br>3p  | - | TGTTAACTGTACCTTCTCTC         |
| Novel-mir-792        | ACTTGGGGTGTGTTGCTTTGGACAGCAACTGTTCTTTCAATTTGAGCAGCATCAATATGTTCTTGAATCTCACTGGCTGTCCA<br>CTTATCTGGGG      | -21.4      | - | Novel-mir-792-<br>3p  | - | TCTTGAATCTCACTGGCTGTCCA<br>C |
| Novel-mir-669        | TACCAGTGCCAGGGCTCTGTTTCTGATTTCTTTGGTTTTCAAAGAGTATACCATAGGATTGATGCAGGGTGGGGTCAAGAG                       | -25        | - | Novel-mir-669-<br>3p  | - | TACCATAGGATTGATGCAGGGTG<br>G |
| Novel-mir-101<br>7   | CATACCTGTGGTAAGGAGAGAGGACATGTTAACAGGCCATAGCTTGTAAATTCTGAGCCCTGCCTGCACCTAAT                              | -21.9      | - | Novel-mir-1017<br>-3p | - | TTGTTAATTCTGAGCCCGTGCC       |
| Novel-mir-997        | ATTTTTTTTTGGCTAGAGCAGGTAATAGGTGTATGCTCCCTAACAGGTGAATGTGGTGTGTTGATTGGGCTGTGCAGGG<br>TGAGGTAGTA           | -25.3      | - | Novel-mir-997-<br>3p  | - | TTGATTTGGGCTGTGCAGGG         |
| Novel-mir-727<br>-1  | AGGGCATAAATAGTTGAGCAAAAGCATTTTACTTATGTGTGCGCTCAAAAAACATCCCGTGTCAAGATGTCAGATGCGCGCGCTCA<br>AAATGTCC      | -27.5<br>4 | - | Novel-mir-727-<br>3p  | - | TCAGAATGTCAGATGCGCGCGCT<br>C |
| Novel-mir-727<br>-2  | ATAAATAGTTGAGCAAAAGCATTGACCTATGCGTGCCTCAAAAAACATCCCGGCTCAGAATGTCAGATGCGCGCGCTCAAAA<br>AAATAT            | -28.5<br>9 | - | Novel-mir-727-<br>3p  | - | TCAGAATGTCAGATGCGCGCGCT<br>C |
| Novel-mir-706        | CCACCCTCTGCGCTTCTCCAAGTCCCATAGACAGAGGCCATCTATGGGACTTGGAGAAGACGCGGGCATGATA                               | -49.9      | - | Novel-mir-706-<br>3p  | - | TATGGGACTTGGAGAAGACGC        |
| Novel-mir-579<br>-1  | AGGCAGTGTCTCTCTCAGTAGCCACTTGACCTCCCATTTCCAGGGCTTCTGTTGGGGTAGACCCTGATT                                   | -20.4      | - | Novel-mir-579-<br>3p  | - | CAGGGCTTCTGTTGGGGTA          |
| Novel-mir-579<br>2   | CTGAAGGCAGTGTCTCTCTCAGTAGCTGCTGGCCCTCCAGTTCATCCAGGGCTTCTGTTGGGGTAGACCCTGATG                             | -22.2<br>2 | - | Novel-mir-579-<br>3p  | - | CAGGGCTTCTGTTGGGGTA          |
| Novel-mir-579<br>-3  | TCTGAAGGCAGTGTCTCTCTCAGTAGCCACTTGCCCTCTCATTTCCAGGGCTTCTGTTGGGGTAGACCCTCATT                              | -24.0<br>2 | - | Novel-mir-579-<br>3p  | - | CAGGGCTTCTGTTGGGGTA          |
| Novel-mir-579<br>4   | TGTCAGTGTACTCTCTCAGTAGTCTGACCTCCAGTTCATCCAGGGCTTCTGTTGGGGTAGACCCTGATG                                   | -21.3      | - | Novel-mir-579-<br>3p  | - | CAGGGCTTCTGTTGGGGTA          |
| Novel-mir-981        | GGAGACCTTGAAGCCCTCCCTGTGCCAAATGTGTCAACAATGTGTCTGAGCAATCATTATGCTTTCTGAGTCAGGAGCAGCTAACAA<br>CAGGTATC     | -18.5      | - | Novel-mir-981-<br>3p  | - | TTCTGAGTCAGGAGCAGCTAACAA     |
| Novel-mir-980<br>-1  | ACCCAGCTCACTGTGCCTGTCCCACTGTCACTGGATTACTAGCTTTCTGACAGACAAGGAGCAGCAGGTGAGGCTGGG                          | -35.9      | - | Novel-mir-980-<br>3p  | - | TTCTGACAGACAAGGAGCAGCAG<br>G |
| Novel-mir-980<br>-2  | CCCAGCTCACTGTGCCTGCCCCACCTGTCACTGGATTACTAGCTTTCTGACAGACAAGGAGCAGCAGGTGAGGCTGTG                          | -31        | - | Novel-mir-980-<br>3p  | - | TTCTGACAGACAAGGAGCAGCAG<br>G |
| Novel-mir-893        | TCAAGCTGTTGTAGCAGCCTCCACATCCCCATTTTTGTTTATAATATGAAAAATGGGGATGTGGAAGTCTGCTACAAACAGCT<br>TG               | -66.6      | - | Novel-mir-893-<br>3p  | - | TGGGGATGTGGAAGTCTGCTAC       |
| Novel-mir-591        | TGCCTCTTGAGAGAAAGACAAGGAGCTAGGGGAAAGCTGTTATCTGCATCCACCTACATCGCAGGACCAGAAGAGAAGGCAGGC<br>CCAGAGGAATGGCTA | -26.7      | - | Novel-mir-591-<br>3p  | - | CCAGAAGAGAAGGCAGGCCCA<br>GA  |
| Novel-mir-103<br>7   | GTAGGGATGTTGGGGTCGGCCAGTCTGCACCTCTGGACTTTGTTGGGATCTGTAGCCACGCCACACTCCGAC                                | -24.6      | - | Novel-mir-1037<br>-3p | - | TTGTTGGGATCTGTAGCCACGC<br>C  |

|                      |                                                                                                         |            |   |                       |   |                               |
|----------------------|---------------------------------------------------------------------------------------------------------|------------|---|-----------------------|---|-------------------------------|
| Novel-mir-102<br>1   | GACAAAGGGGCAAAAGAGGAGCAGAGGAAGAAGAGGAGGGAGAAAAGGAGGGGATACGATTGAGTTTGTGTTTCTCACTTTGCC<br>CATAAACG        | -20.7      | - | Novel-mir-1021<br>-3p | - | TTGTTTTGATTCTCACTTTG          |
| Novel-mir-100<br>1-1 | CATTACACGTCGGATCTCTCCACCATCCACCTGCGCGCAGGCAGCTGGAAAGATGAACAGAGACCGGACCCAGAAAC                           | -26.3      | - | Novel-mir-1001<br>-3p | - | TTGAAAGATGAACAGAGACCGG        |
| Novel-mir-100<br>1-2 | CATTACACGTCGGATCTCTCCACCATCCACCTGCGCGCAGGCAGCTGGAAAGATGAACAGAGACCGGACCCAGAAAC                           | -23.4      | - | Novel-mir-1001<br>-3p | - | TTGAAAGATGAACAGAGACCGG        |
| Novel-mir-941<br>-1  | GGTGAATAAACCTGCTGAAGCGTCTCCTGTGTACCCCTCTATCCAGTTGGTAAACACTGAATGTTAAGAGTTAGATGCAAAACG<br>GTAGGAGTTGCATG  | -22.1      | - | Novel-mir-941-<br>3p  | - | TTAAGAGTTAGATGCAAAACGGTA<br>G |
| Novel-mir-941<br>-2  | TGTGAATAAACCTGCTGAAGCGTCTCCTGTGTACCCCTCTATCCAGTTGGTAAACACTGAATGTTAAGAGTTAGATGCAAAACG<br>GTAGGAGTTGCATG  | -22.4      | - | Novel-mir-941-<br>3p  | - | TTAAGAGTTAGATGCAAAACGGTA<br>G |
| Novel-mir-950        | GTGTCGACATAGCAGCTTAGCTCTGGGTAAGATCCAATGCGCTGAAAAGACTACGTTCTCTTAGCTGTAGTAACGTCGCCCGGTC<br>GTAAG          | -24.6      | - | Novel-mir-950-<br>3p  | - | TTAGCTGTAGTAACGTCGCC          |
| Novel-mir-941        | TGAATAAACCTGCTGAAGCGTCTCCTGTGTACCCCTCTATCCAGTTGGTAAACACTGAAGGTTAAGAGTTAGATGCAAAACGGT<br>AGGAGTTGTATG    | -21.9      | - | Novel-mir-941-<br>3p  | - | TTAAGAGTTAGATGCAAAACGGTA<br>G |
| Novel-mir-876        | GGGCACCTCTAAATATTTTTCATGGTACTCACTATGTCCCTTACAGATTGCTAGAAAATTTCTGATGTGGAGAGAATTGCCA                      | -20.4      | - | Novel-mir-876-<br>3p  | - | TGCTAGAAAATTTCTGATGTGGAG      |
| Novel-mir-827        | GATGTGGAAGCTGATGCTCATGATGTTTCCAGCGATGGTGAGATGAAGTGGTGGCGTCCGGTGGGTGATGT                                 | -18.4      | - | Novel-mir-827-<br>3p  | - | TGAGATGAAGTGGTGGCGTCCGG       |
| Novel-mir-818        | TCAAGCCGAGAGAGGATCTCCCTGAAACACTGCGTAGAGGGTTGATCGTTGCCGAAAAGACACGTGACTGATGACGTCGCAGCA<br>CAGAAATGGCTGGCC | -25.2      | - | Novel-mir-818-<br>3p  | - | TGACTGATGACGTCGCAGCACAGA<br>A |
| Novel-mir-777        | TGAACAGTGTTCAGCGTCTCACAGCCTGGTGGATGAAGCTGTCTGTAAGTCTGGTGGAGTGGCCGTAAGA                                  | -20.5      | - | Novel-mir-777-<br>3p  | - | TCTGTAAGTCTGGTGGAGTG          |
| Novel-mir-730        | GACAAGAAGACTCTTTTGGTTCTCCATGCTGGACACCTTTTCCCTCAGGGGTGCAACCTCAGTCTGGAGATCAGAGCTCAAACCTCT<br>TGAG         | -24.5<br>2 | - | Novel-mir-730-<br>3p  | - | TCAGTCTGGAGATCAGAGCTCA        |
| Novel-mir-721        | ATGTTGACTGTTAGTCTCTCCAAAGTTTGTGTTCATGTTACACTTTCACACGGAAGTATGGAGCCCTTAGTCACTTG                           | -26.3      | - | Novel-mir-721-<br>3p  | - | TCACACGGAAGTATGGAGCCCT<br>T   |
| Novel-mir-600        | CCTCATCTTCTGCTCTGAATGAACAGCTGGGCAATTCGCCATCAAACATGCCGGGTTCCCTCTCATCATTGTCGGAGTCACTCA<br>CGTTGC          | -21.2      | - | Novel-mir-600-<br>3p  | - | CCCTCTCATCATTGTCGGAGTCA       |
| Novel-mir-545        | CAGCCCGGAGTGGTGGTTCATGTTAGATCAGCTGTCTAACACCCGGGTGACGGCCAAGCAGATTAAGAGGTGGACTGAGAGGG<br>ATCCAG           | -21.6      | - | Novel-mir-545-<br>3p  | - | AGCAGATTAAGAGGTGGACTGAG       |
| Novel-mir-533        | ATGTGCAGCTCAAGCATGCAGTGTGTGAGTGTGGACCTGAGAGGAGAGAAGGTACAGTTAACAGGGCAGGACGGGAGGGGTGCC<br>A               | -21.2      | - | Novel-mir-533-<br>3p  | - | ACAGTTAACAGGGCAGGACGGG        |
| Novel-mir-948        | AGCAGTCAATGGAGCGATGATGGCTGGAGATGAGGATGGCTGAGAGGGAATATCAGAGAGACAGATTACTGGAGACTGTGCAT<br>CGACCAGTGAAGGCG  | -25.4      | - | Novel-mir-948-<br>3p  | - | TTACTGGAGACTGTGCATCGACC       |
| Novel-mir-466        | AATTCTGGGCTCAGACTTGGCCGCTCAAAGGCCATTTTGTGTTTCTGATGCCATTCTGTTGTGACTGTCTGTTGTTTGGGT                       | -18.4<br>7 | - | Novel-mir-466-<br>5p  | - | TTCTGTTGTGACTGTCTGTTG         |
| Novel-mir-863        | AGCTCTGGGTTCTGTTTCTATCTGAAGCCCTATCACACAGAGAAGTCAAGTGCATAGCTGCTGCAGGAAGGCGGAACCACGAGT                    | -27.7      | - | Novel-mir-863-<br>3p  | - | TGCATAGCTGCTGCAGGAAGGCG<br>G  |
| Novel-mir-846        | TGACCGGTTGTCGATCAGCGCAGCAGAAACACAGTCAATGGTATGATGGGTGATGATGGGCCGGCTGCGGACGTTGGGATCA                      | -24.8      | - | Novel-mir-846-<br>3p  | - | TGATGATGGGCCGGCTGCGGA<br>C    |
| Novel-mir-714<br>-1  | AGCGGTAGACTGGTCAGATGCGCAGTGACAGTATTTTTCAGGGCATTCTGTATTTAGCTCTCCTGCTGCGTGGCAAGTTGCGAA                    | -25        | - | Novel-mir-714-<br>3p  | - | TATTTAGCTCTCCTGCTGCGTGG<br>C  |
| Novel-mir-714<br>-2  | ATGTAGACTGGTCAGATGCGCAGTGACAGTATTTTTCAGGGCATTCTGGCCGCTGATTTAGCTCTCCTGCTGCGTGGCAAGTGT<br>GGG             | -28.1      | - | Novel-mir-714-<br>3p  | - | TATTTAGCTCTCCTGCTGCGTGG<br>C  |
| Novel-mir-714<br>-3  | GTGTGTAGACTGGTCAGATGACAGTGTGAGTATTTTTCAGGGCATTCTGGCCGCTGATTTAGCTCTCCTGCTGCGTGGCAAGTG<br>AAACA           | -27        | - | Novel-mir-714-<br>3p  | - | TATTTAGCTCTCCTGCTGCGTGG<br>C  |
| Novel-mir-579        | CTGAAGTAGTCTCTCTTTTCAAGTACCCACTTGAACCTCCAGTTACCCAGGGCTTCTGGTTGGGGTAGACCCTTATG                           | -20.5      | - | Novel-mir-579-<br>3p  | - | CAGGGCTTCTGGTTGGGGTA          |
| Novel-mir-546        | TTAATTCATTATAAAATCAGAATCAGCTTTATTGGCCAGGTGTGTTGGGCACATGAGGAATTTGACTCTGTTACATGATAGAATAAT                 | -20.8      | - | Novel-mir-546-<br>3p  | - | AGGAATTTGACTCTGGTACATG        |
| Novel-mir-527        | TGGTGCATCACTATGTGGTACGGAGCCTGACTGCCTCTCGAAGGACTCTGCAGCACAATGTTAATACAGCC                                 | -33.8      | - | Novel-mir-527-<br>3p  | - | AAGGACTCTGCAGCACAATG          |
| Novel-mir-102<br>1-1 | ATACACAGGGCAGGAAGAGGAACGGAGGAGAAGAGGAGGGGATACTGCATGAGTTTGTGTTTCTCACTTTGCTTTACGAA                        | -20.5      | - | Novel-mir-1021<br>-3p | - | TTGTTTTGATTCTCACTTTG          |
| Novel-mir-102<br>1-2 | GCATGAGGGGCAAGGAGGAGCGGAGGAGAAGAGGAGGGGATACTGCTCGACTTTGTTTGTGTTTCTCACTTTGCTTTAATGG                      | -29.3      | - | Novel-mir-1021<br>-3p | - | TTGTTTTGATTCTCACTTTG          |

|                 |                                                                                                           |       |   |                   |   |                                |
|-----------------|-----------------------------------------------------------------------------------------------------------|-------|---|-------------------|---|--------------------------------|
| Novel-mir-1016  | TCTCTCCTGGCAGCCAGGGAGACATAATTTATCTGGTGGTCCACCCCTGGATCGGGTCTCTGTTGTTGCTCCCGTATGGTGT<br>CCTCGATCTT          | -28.3 | - | Novel-mir-1016-3p | - | TTGTTGTGCCTCCCGTATGGTGT        |
| Novel-mir-938   | ATAGCTAGCTTTATTTACCGGTTAAAAAGACAAATCTTGTGTTGGGCCATTGCTTGAATGTTTTGAGACATTAATCTTGGCTTGCA<br>CT              | -18.2 | - | Novel-mir-938-3p  | - | TGTTTTGAGACATTAATCTT           |
| Novel-mir-888   | GCCCCGTGCACACTGATGTGTTTGTAGTGGTTAAAGTTACATGTTAATATGGATTATGTAATAGAATAGTGTATGGGTT                           | -22.2 | - | Novel-mir-888-3p  | - | TGGATTATGTAATAGAATAGTG         |
| Novel-mir-774   | AATTCTGGGACCAGTGTGCAAAAGTTGGGCTCCGTCAGAGGCTCTGGGAGAAGGAAGCCCTCAATCTGAGAGACCTGGAGGA<br>GTTGGCAAAGAAAAG     | -33   | - | Novel-mir-774-3p  | - | TCTGAGAGACCTGGAGGAGTTGG<br>C   |
| Novel-mir-717   | ATCATCTCTGGCATTACCCGCTGCCTTAATTGTAAGACATTAATCAAGGTCGCTGTGAACACGGAGAGACACA                                 | -26.3 | - | Novel-mir-717-3p  | - | TCAAGGTCGCTGTGAACACG           |
| Novel-mir-714-1 | ATGTAGACTGGTCAGATGCCAGTGATAGTTATTTAAAGGCATTTTTGGACGCTGATTTAGCTCTCCTGCTGCGTGGCAAGTGT<br>GGG                | -21.2 | - | Novel-mir-714-3p  | - | TATTTAGCTCTCCTGCTGCGTGG<br>C   |
| Novel-mir-714-2 | ATGTAGACTGGTCAGATGCCAGTGATAGTTATTTTCAAGGCATTTTTGGCCACTATATTTAGCTCTCCTGCTGCGTGGCAAGTGTG<br>GG              | -25.1 | - | Novel-mir-714-3p  | - | TATTTAGCTCTCCTGCTGCGTGG<br>C   |
| Novel-mir-666-1 | AGTAAGGTTAATAGGTTACAGCTCCAGACTTGACAATGTAGAGATGAGCCATCTACATGTGCAGACATGAGGCTGCCATTAGATG<br>C                | -26.7 | - | Novel-mir-666-3p  | - | TACATGTGCAGACATGAGGCTG<br>C    |
| Novel-mir-666-2 | GGTTTTAATGTGTTAAAGCTCCAGACTTGACAATGTAAGGTTGAGCCATCTACATGTGCAGACATGAGGCTGCAATTAGATGC                       | -19.3 | - | Novel-mir-666-3p  | - | TACATGTGCAGACATGAGGCTG<br>C    |
| Novel-mir-666-3 | GGTTTTAATGTGTTACAGCTCCAGACTTGACAATGTAGAGGTTGAGCCATCTACATGTGCAGACATGAGGCTGCAATTAGATGC                      | -23.5 | - | Novel-mir-666-3p  | - | TACATGTGCAGACATGAGGCTG<br>C    |
| Novel-mir-666-4 | TAATGTGTTACAGCTCCAGACTTGACAATGTAGAGGTTGAGCCATCTACATGTGCAGACATGAGGCTGCAATTAGATGC                           | -25.4 | - | Novel-mir-666-3p  | - | TACATGTGCAGACATGAGGCTG<br>C    |
| Novel-mir-1012  | TCGTCACAGTAACAGCTGGGGTAATCATGTGATAACAGCTCAGCGTAGGATGGAGTTGTATCGAAAAGCCATAGCTGTCAGATG                      | -25   | - | Novel-mir-1012-3p | - | TTGTATCGAAAAGCCATAG            |
| Novel-mir-863   | AGCTCTGGATCCGCTCTATCTGAAGCACTATTACAAGTATAGTGCATAGCTGCTGCAGGAAGGCGGAACCACGAGT                              | -31.3 | - | Novel-mir-863-3p  | - | TGCATAGCTGCTGCAGGAAGGCG<br>G   |
| Novel-mir-859   | AGCTCAGGAGACCGCTTTCCAGCAGGTCAGGGACTACTGCACTCTGACCGAGTGTAGTGCATTTGATCCAGAACCAGGAGGTG<br>GACTGGC            | -41.7 | - | Novel-mir-859-3p  | - | TGCACTTGTATCCAGAACCAGGAG<br>G  |
| Novel-mir-752   | TGGGTGCTGGTATTGGAGACCCCGAGCTGAGGAAGAGCCCGGCTCAGCTGGTGGTCTGCTGTGGCACGGGGCCGG                               | -31   | - | Novel-mir-752-3p  | - | TCGACTGGTGGTCTGCTGTGGC         |
| Novel-mir-575   | TAGGCTTAATCACAGGTACGCAGTTTTTCCATAGGGTCTGGGCATGGATTCCAAGCAAAGTCACTGGTGGACTTACAAGTAGTGATG<br>GCCAT          | -26.7 | - | Novel-mir-575-3p  | - | CACTGGTGGACTTACAAGTAG          |
| Novel-mir-567   | CTGGAGACCTGTAGGGGGCCGGTGCATTGTGTTTTGGGCAGTGCCAGGCGCAAGTGTAGGCTGACCTGAACCTCGGATG                           | -29   | - | Novel-mir-567-3p  | - | CAAGTGTAGGCTGACCTGA            |
| Novel-mir-1008  | TCCTTGGTCAAGACACTGAACCCCAAGTTTCCCCCGATGGTCAGAGCCATTGGTTGAGTTGGTGTGCTGCAGATGTCTGCCTTGG                     | -30.4 | - | Novel-mir-1008-3p | - | TTGGTTGAGTTGGTGTGCTGCAGAT<br>G |
| Novel-mir-1003  | CAGGTAATAAATTAACATTACAGCTCCAGATCTCCACCACCAACCTGCGCGCAGGCAGCTGGAAAGTGAAGACCCTGGACCAT<br>GAAACCTA           | -22.5 | - | Novel-mir-1003-3p | - | TTGGAAGATGAAGACCCTGGAC<br>C    |
| Novel-mir-990   | CAGAGCAACTGGGGTTCAGTGTCTTGCCCAAGGACAATTTGACATGTGGACTGCCGGCACTGCAATTC                                      | -20.3 | - | Novel-mir-990-3p  | - | TTGACATGTGGACTGCCGGC           |
| Novel-mir-986   | GCCTTGGGTCTTCGATTGGTTTGTCCCTGAACAACTTACATTTTTGAGTGGGTGTGGTTCTTATGGATTGGGCATTACGGTCCG<br>GTTCTT            | -20.7 | - | Novel-mir-986-3p  | - | TTCTTATGGATTGGGCATTACCG<br>G   |
| Novel-mir-942   | GTTCTCTGCAGCAAAGTGAATTTAGTGTCTAGGGTGCCACACAGCGACCTTAAGGATTATGGAGGCCATTGTGCTCTTAGGAA                       | -20.8 | - | Novel-mir-942-3p  | - | TTAAGGATTATGGAGGCCATTGT<br>G   |
| Novel-mir-934   | ATTATCCATGTGCAAACTGAGAATGTAACAGTACATGATGATTTCTCGTAATAAACTCCTCAGCTGTTTAGAGTCTGATGGCAGA<br>GGGAAAGAAAAG     | -19.1 | - | Novel-mir-934-3p  | - | TGTTAGAGTCTGATGGCAGAGG         |
| Novel-mir-419   | GCCTATGTATTAAGGCCTATTATGGTCTGAACCAGGACAAGTTACTGTGTTGACTGTAAGGATGGTATTAATAAGG                              | -20.8 | - | Novel-mir-419-5p  | - | TGTGTTGACTGTAAGGATGGT          |
| Novel-mir-894   | AGCACGTGGAGGCCACAGCTGGCAGGCTGGACGGACAGCAGGTTGACTGCAGCATGGAACAGGTTGGGGCTGAAGCTGCAG<br>CGATGGCTTGGACTGCT    | -36.2 | - | Novel-mir-894-3p  | - | TGGGGCTGAAGCTGCAGCGATG<br>GC   |
| Novel-mir-338   | AGGTAGTTGAGAAGCTCTCCTGCTGGCAAGGCAGATGAGATCTGCCTGAGTACCTAAGTCTCTGGATGTTGTGGGGCTGGCTTGG<br>CTGACACCCG       | -30.6 | - | Novel-mir-338-5p  | - | TGGATGTTGTGGGGCTGGCTTGG<br>C   |
| Novel-mir-882-1 | AGGATCACAGGTAATAAATTAACATTACACGCTCAGGTATCTTGACCCGCAAACTGCTCGCAGGCAGATGGAAGATGAAAGACCCTGA<br>ACCACCAGGCCTA | -21.5 | - | Novel-mir-882-3p  | - | TGGAAGATGAAAGACCCTGAACC<br>C   |
| Novel-mir-882-2 | CAGGTAATAAATTAACATTACACGTTACAGTATCTTGACCTCCAACTGCTCGCAGGCAGCTGGAAGATGAAAGACCCTGAACCCAC<br>CAGGCCTA        | -24.9 | - | Novel-mir-882-3p  | - | TGGAAGATGAAAGACCCTGAACC<br>C   |

|                 |                                                                                                           |            |   |                   |   |                              |
|-----------------|-----------------------------------------------------------------------------------------------------------|------------|---|-------------------|---|------------------------------|
| Novel-mir-882-3 | CAGGTAATAACATTACAGCTCAGGTATCTTGCACCTCCAACTGCTCGCAGGCAGCTGGAAGATGAAAGACCCTGAACCCACC<br>AGGCCTA             | -21.1      | - | Novel-mir-882-3p  | - | TGGAAGATGAAAGACCCTGAACC<br>C |
| Novel-mir-880   | GACATGTTGGTGGGTAAGAGGAAACAATTGTAAGCTAATTTCTCAGTTCTTTAAACAGTGGAACTCAGAGAGACGAAGCGGACCCT<br>TGGA            | -19        | - | Novel-mir-880-3p  | - | TGGAACTCAGAGAGACGAAGCG<br>G  |
| Novel-mir-865   | TTGCTTCTCCGTGAGGGCAGCCTTGCCTGTATTTCTCTTATAGCTGCAGACTAAATCTGTTGCATGTACATGACCGCTCTCAGCG<br>GATTTTTGA        | -24.2<br>3 | - | Novel-mir-865-3p  | - | TGCATGTACATGACCGCTCTCAG<br>C |
| Novel-mir-844-1 | ACCTCTTCCCCGTGGTCTGCCACGGTACTGAAGTCCACAGTACATGGGAGCAGAATCCCACTGATAAGGTGGTGGTGGCTGGTGT<br>GAACAAAGG        | -31.5      | - | Novel-mir-844-3p  | - | TGATAAGTGGTGGTGGTGGCTGG<br>T |
| Novel-mir-844-2 | ACCTCTTCTCATGGCCTGCCACGGTACATGGGAGCAGAATCCTACTGATAAGGTGGTGGTGGCTGGTGTGAACAAAGG                            | -23.1      | - | Novel-mir-844-3p  | - | TGATAAGTGGTGGTGGTGGCTGG<br>T |
| Novel-mir-812   | TGCTGGAAAGTGTCTCGACTGGGACTCCATTGTTCTACTGGGGTACTTCAACTCATGAGCGATGACAGTACCTGGAGG<br>GGCGTGATTGGCAGG         | -30.1      | - | Novel-mir-812-3p  | - | TGACAGTGATACCTGGAGGGGG<br>T  |
| Novel-mir-143-1 | ATGATAATAAAAGGTGGGCGACTGTTCTATTTCTGTTTGGCCCTAGACTATGGAATGCCCTGCCGGTTGAACACGG                              | -23.2      | - | Novel-mir-143-5p  | - | TAGACTATGGAATGCCCTGCCGG<br>T |
| Novel-mir-143-2 | TAGTGGTCCCGCATCTCGCTATAAAAAGTGGGGTACTGTTCTGTTTCTATCTGAGCCCTAGACTATGGAATGCCCTGCCGGTTG<br>TACTACGG          | -22.6      | - | Novel-mir-143-5p  | - | TAGACTATGGAATGCCCTGCCGG<br>T |
| Novel-mir-619   | CCAGTGAATAACAAGGACGTTTTCTGATCTCAGCAGTTCCTTTTGTCTGCTTTTGAAGGATGTGTTTGTCTGCTCGGTGC                          | -19.4      | - | Novel-mir-619-3p  | - | CTTTTGAAGGATGTGTTTGTTC       |
| Novel-mir-594   | ATACCGGGGCTCTAACACGGTGGAGAAGAGATGCTCACTTTATTGTGCTCCCATCAGTCACATTGGTTTGTGCTCGGCTG                          | -25.6      | - | Novel-mir-594-3p  | - | CCCATCAGTCACATTGGTTTGTG      |
| Novel-mir-562   | CAGGGTGCACCTAGCAGCACATCATGTTTTGCAGATATGACTGAATCACTCCAAAACATTATGCGTGTACTGTGAGCTCAA                         | -32.1      | - | Novel-mir-562-3p  | - | CAAAAACATTATGCGTGTACT        |
| Novel-mir-556   | GTGTGTGTGTGTGTGTCTGTGTGTGTGACGCGCATGTAGTGTGAAATGGAGTCAAGCCACAGCAGTCACTGTGAG                               | -22.6      | - | Novel-mir-556-3p  | - | ATGGAGTCAAGCCACAGCACA<br>G   |
| Novel-mir-1023  | TGAAAAATATGGACTGTATTTTTATATAGCGCTATTCTCACAGTGTGTGCACTGGCCAAAGCGTTTACAGAGGATCATAACCA<br>TTCACCCAT          | -24.7      | - | Novel-mir-1023-3p | - | TTTACAGAGGATCATAACCC         |
| Novel-mir-984   | TGATCATAGACTTCCACCATCTGCAGAGAAAACTCTTCTGTTGGTTTGGAGAAAGGGCTGTATGGTGG                                      | -19.5      | - | Novel-mir-984-3p  | - | TTCTGTTGGTTTGGAGAAAGGGC      |
| Novel-mir-970   | AAAGGATAACAGTGGTTGGCCTCCGTTGGGACTGACAACACCCGCCATGAACGGCGCGCAATTCGAATGCACTGACCCGCTTGT<br>CGTATC            | -23.5      | - | Novel-mir-970-3p  | - | TTCCAATGCACTGACCCGCT         |
| Novel-mir-951   | GCCTAAACACTACAGCAGCTGCTTTTACTGATCTAAACACTTTGGGACTTGTAGTGAATCAGCTGCTGTGCTGTTGTCT                           | -33.2<br>2 | - | Novel-mir-951-3p  | - | TTAGTGAATCAGCTGCTGTG         |
| Novel-mir-937   | CATCGGCTGTTGTTGCTGCGCTGAGCCACACTGTGTGAGTCATGGAGGTTTGTGCGAGCGGGCAAGGGCTTTCTTCT                             | -24.8      | - | Novel-mir-937-3p  | - | TGTTTGTGAGGGGGCAAGG          |
| Novel-mir-917-1 | AACCTAAGGCAGGGATGAATCCAGCCGCCCATGAGCAAGATGTTGGGTGATTGGATCCGGGTCTGCAGCATCTGAGGAG                           | -27.1      | - | Novel-mir-917-3p  | - | TGTGATTGGATCCGGTCTGCAG<br>C  |
| Novel-mir-917-2 | ACTCTGGGTACACAACCTGAGGCAGGGATGAATCCAGCCGCTCCCTGAGCCAGATGTTGGGTGATTGGATCCGGGTCTGCAGC<br>ATTTGAGGAG         | -30.4<br>2 | - | Novel-mir-917-3p  | - | TGTGATTGGATCCGGTCTGCAG<br>C  |
| Novel-mir-914   | TGACAGTGTGGTGTACTGTAGGTTGGCACACGGTCTGGGTGAGCAGTGTGAAGAGCAATGGACTGAGCACATGCCCC                             | -23.8      | - | Novel-mir-914-3p  | - | TGTGAAGCAATGGACTGAG          |
| Novel-mir-908   | GCCTGACACCCTGTCTGGTCTGCGGCTTTGTTGGTGTGATCCTTCTCAGGGTGGAGCTCACCTGTGTAGCTGCAGGACGAGAG<br>GCTGGTGTCTTTC      | -44.1      | - | Novel-mir-908-3p  | - | TGTAGCTGCAGGACGAGAGGCT       |
| Novel-mir-313   | GACGTGAGATCTCACTGCGTACGTGAGCAGGTGCGTAACATGTTGGTTTGTGGTGTAGTAGGTGTGCGTAGTTGCTGTTGGTA<br>TGATCATTGCTGCTG    | -27.4<br>6 | - | Novel-mir-313-5p  | - | TGCGTAGTTGCTGTTGGTATGAT<br>C |
| Novel-mir-871   | TACTTGTGTGTGAGCGTCGACAGGTCATGTAGCTGCTGCTGAGTGCCTGAGCCAGTTGAGCGTTTACGCGTGAAC                               | -26.6      | - | Novel-mir-871-3p  | - | TGCCTGAGCCAGTTGAGCGTTG       |
| Novel-mir-797   | TCAGAGGGAGGAATACCAGGAGAGCATGTGGGATGAAACACAGGACAGTCTCTTTTATCTTCTTCACTGCTCATTCTCGCTGC                       | -22.9      | - | Novel-mir-797-3p  | - | TCTTTCATCTTCTTCACTGCTCA      |
| Novel-mir-793   | GATGCACACAGATGGATAAAAACATTAATAACATACAAAAATGCACACTGTTGAGAGCCCTCAACACCTCTTGCAATTATTGCTCTGTA<br>AAATGCGTTCCC | -22.9      | - | Novel-mir-793-3p  | - | TCTTGCATTAATTGCTCTGTA<br>AAA |
| Novel-mir-713   | ACTTCAAGTACAACCTCCAACAGTGCATCTACAAAAGTTCTCAGACGACTGCTATTGTTGGATGTGCATCTGGGGGGATGAGG<br>A                  | -24.5      | - | Novel-mir-713-3p  | - | TATTGTTGGATGTGCATCTGGGG      |
| Novel-mir-162   | GCCAGGCTGGGGAAATCGGGAGGGGATTCTGTCATTACCCTGGCTGAAGTGGCAAGGATGTTAAGGAACCTCCTCGTGGCACGG<br>CTCTGGG           | -43.2      | - | Novel-mir-162-5p  | - | TAGTTAAGGAACCTCCTCGTGGC<br>A |
| Novel-mir-683-1 | CTGACCTAAAGTGTCTGCCAGTACTGCATCAGACTGCAGGTCAATGACTTCTAGCTGAACATCACTGGGTGCATTATCTACACT                      | -21.3      | - | Novel-mir-683-3p  | - | TAGCTGAACATCACTGGTGCAT       |

|                 |                                                                                        |       |   |                   |   |                          |
|-----------------|----------------------------------------------------------------------------------------|-------|---|-------------------|---|--------------------------|
| Novel-mir-683-2 | CTGACTTAAAGTGCTCTGCCAGTATTGCATCAGACTGCAGGTCAATGACTTCTAGCTGAACATCACTGGGTGCATTATCCACT    | -22.1 | - | Novel-mir-683-3p  | - | TAGCTGAACATCACTGGGTGCAT  |
| Novel-mir-596-1 | AAACTTAGGGGTGACAAGGCTTTTGTCTGGGGCTCCAAAGTTGTGGATTTCATTGCCCTATATATTAGGCAGGCCCTTATTG     | -30.3 | - | Novel-mir-596-3p  | - | CCCCTATATATTAGGCAGGCC    |
| Novel-mir-596-2 | AAGACTTGGGGGACAGGGCTTTTGTCTGGGGCTCCAAAGTTGTGGAATACATTGCCCTATATATTAGGCAGGCCCTTCGTT      | -32.5 | - | Novel-mir-596-3p  | - | CCCCTATATATTAGGCAGGCC    |
| Novel-mir-587   | GTAAGGACCTAAGCAAGCTACTTGTTCATCGCTGCTGGCGATGGCAGACAGCGGCTGGTCAATGAAGTCAAGCAGCGGAG       | -35.6 | - | Novel-mir-587-3p  | - | CATGTGAAGTCAAGCAGCGGAGGA |
| Novel-mir-578-1 | TTAACTACAATGTGTATTCACTGTGATGTGCCTTGGGAGTGATGCTCAGCACTGCTCCCATGCAGGGAGTTACAGGAAAAGGCAAA | -27.3 | - | Novel-mir-578-3p  | - | CAGGGAGTTACAGGAAAAGGCA   |
| Novel-mir-578-2 | TTAACTACAATGTGTATTCACTGTGATGTGCCTTGGGAGTGATGCTCAGCACTGCTCCCATGCAGGGAGTTACAGGAAAAGGCAAA | -27.3 | - | Novel-mir-578-3p  | - | CAGGGAGTTACAGGAAAAGGCA   |
| Novel-mir-578-3 | TTAATTAACATAATGTGTATTCACTGTGATGTGCCTTGGGAGTGATGCTCAGCACTGCTCCCATGCAGGGAGTTACAGGAAAAGG  | -28   | - | Novel-mir-578-3p  | - | CAGGGAGTTACAGGAAAAGGCA   |
| Novel-mir-576   | ACTGTCTGCTGAAGTCTGTACTTGTCTGCTTGGTTGCTGAGCCAACCAGACAGTATAGAGTGCAGAGAACAGACTCG          | -28.3 | - | Novel-mir-576-3p  | - | CAGACAGTATAGAGTGCAGAG    |
| Novel-mir-568   | GCTGGAGCTGGTGCATTGTAGTTGCATTGCATGTTATGCTAACACACTGCAATGGATCTGCTTGAACACAGAACTTGG         | -30.7 | - | Novel-mir-568-3p  | - | CAATGGATCTGCTTGAACA      |
| Novel-mir-535   | CAGTCTACTTCTGCTTATTGTGAGTTCCTGGTTAAAAGAACCGGAAGCTACAGAGAAATAGTAGCT                     | -19.6 | - | Novel-mir-535-3p  | - | ACCGGAAGACTACAGAGA       |
| Novel-mir-1036  | GCTTGATACGCCCTCTCTGCCCGGCTGGGGCAGGGTCTTTTTTGTGGGAAAAGGATGGGGCTTAGAC                    | -29.1 | - | Novel-mir-1036-3p | - | TTTGTGGGAAAAGGATGGG      |
| Novel-mir-1025  | AGGATGCTTCGTCACCAAGATGCGACCTATCACTCGGTGTCTCTGCGAACTTTAGGATGATGTTGTGGAGGCGACACAG        | -27.2 | - | Novel-mir-1025-3p | - | TTTAGGATGATGTTGTGGAGGC   |
| Novel-mir-1021  | GCTGTTGTGACACATATGACCTAGTTTACAGACGAGGCGAGGGGAAGGACTGCGCGAGTTTGTGTTGATTCTCACTTTGTC      | -21.6 | - | Novel-mir-1021-3p | - | TTGTTTTGATTCTCACTTTG     |
| Novel-mir-1007  | TCTGTACTGGCTGCTGGACTTCTGACTGGCAGGCCCCAGACTGTCAGGATTGGTAATAGGACTTCAGCCAGCATTGTACAAA     | -29.5 | - | Novel-mir-1007-3p | - | TTGGTAATAGGACTTCAGCCAGC  |
| Novel-mir-994   | TGACAATAATGATGTTCCAGTGTTCAGTCTCAGTAGAGCCAGCAATGGCATTGTATGTTGAACATTATTTGAAAGTCTGTTG     | -20.4 | - | Novel-mir-994-3p  | - | TTGATGTTGAACATTATTTGA    |
| Novel-mir-991   | CTACAGGTTCCATACTGAGACATGGCAGCATTTAGGCTGTATACTAATTGTGATTCTACTGTTGACTTGGTCTGCTCCTGCA     | -25.2 | - | Novel-mir-991-3p  | - | TTGACTTGGTCTGCTCCTGCATG  |
| Novel-mir-982   | CCCAGTCACTGCGCTGCCCTGACCTGTCAGTGGATCACCAGTTTTCTGATAGACAGGAAGCAGCAGGTGAGGCTGGA          | -36.3 | - | Novel-mir-982-3p  | - | TTCTGATAGACAGGAAGCAGCAGG |
| Novel-mir-971   | TGTCCTCCGTGCAGGCATTGTTACCTGAGCTGTGAAGGCTTTTACACTTCCATAGCTTGTGTCAGTCTTACTTGGGCA         | -30.6 | - | Novel-mir-971-3p  | - | TTCCATAGCTTGTGTCAGTCTTC  |
| Novel-mir-932   | AGACCAGCTTCCCTGAGTTGCCGTGTAAGTATAGCTGTTGCTGGGCTTCTTTATTGTGGCAGCTGTGTTCACTGTCAGCTCAGG   | -40.0 | - | Novel-mir-932-3p  | - | TGTTCACTGTCAGCTCAGGTCA   |
| Novel-mir-902   | GCTGCTATCTGTTTAGCATTAGCTCGCAGTGCACACACGCTCCCATTCAGCATTGTGGTTTTGTTGAGGTGCTGGAATAAATTC   | -21.2 | - | Novel-mir-902-3p  | - | TGGTTTTGTTGAGGTGCTGGAAT  |
| Novel-mir-895   | CGGGCATGGGACCGCATCTTCATGGCTCCGGCCATGCAGGGCTGTGTGATATAGCAGATAAAGGCTGGGTTAGAGCAGAAGAA    | -26.7 | - | Novel-mir-895-3p  | - | TGGGTTAGAGCAGAAGAAGAGGGA |
| Novel-mir-884   | TGTTTGGTGACAGAGTTTGTGTTTTCAGTCTTGTCTGTAAGCTGGATACAGGAACAAGAAACGTGGTCTGAGC              | -18.6 | - | Novel-mir-884-3p  | - | TGGATACAGGAACAAGAAACG    |
| Novel-mir-884   | TGTTTGGTGACAGGTTTGTGTTTTCAGTCTTGTCTGTAAGCTGGATACAGGAACAAGAAACGTGGTCTGAGC               | -19.9 | - | Novel-mir-884-3p  | - | TGGATACAGGAACAAGAAACG    |
| Novel-mir-313   | AAGCCACCAAGATGATGCGCAACATGTGGGTTTGTAGTGTAGTAGTGTGCGTAGTGTGTTGATGATCATTGTTGCTG          | -18.9 | - | Novel-mir-313-5p  | - | TGCGTAGTGTGTTGTTGATGAT   |
| Novel-mir-860   | ACTGGGAAACACCCAGTGCACAAAGTCCATGATCGGCTGGTACTGTTGTTTATGATGGCGTGCATGCAGGACTAGAGATCGGC    | -33.6 | - | Novel-mir-860-3p  | - | TGCAGGACTAGAGATCGGCTGGC  |
| Novel-mir-846   | AGACCGGTGTCTATCAGCGCAGCAGAAACACAGTCAATGGTATGATGGGTGATGATGGCCGGGCTGCGGACGTTGGGATCA      | -26.4 | - | Novel-mir-846-3p  | - | TGATGATGGCCGGGCTGCGGA    |
| Novel-mir-838   | TGGGCTCAGGCAGTCCCAAGGGCAGGGACTCAGAGCAAGGGAGTACGCCCTGCTCCCTGAGTGTAGTGTCCCGGGAATC        | -37.4 | - | Novel-mir-838-3p  | - | TGAGTGTAGTGTCCCGGGA      |
| Novel-mir-831   | GATGACCAGCACCTTCTAGAGCTGCCGTCGGGCCAACTGAGCTATCGGGGAGAGGAGCCTTGGTGA                     | -28.3 | - | Novel-mir-831-3p  | - | TGAGCTATCGGGGAGAGGAGC    |



|                 |                                                                                                        |        |   |                  |   |                          |
|-----------------|--------------------------------------------------------------------------------------------------------|--------|---|------------------|---|--------------------------|
| Novel-mir-826   | GTCTCTGCTCCTGTA CTGGTCAAAGCTCCTCAGTGTGGATAGATGCCTGAGAGGTTCTGAACAAGTATAGGATCTCTGA                       | -30.7  | - | Novel-mir-826-3p | - | TGAGAGGTTCTGAACAAGTATA   |
| Novel-mir-824-1 | ATGGTCACGGGGGCCACCACACTCGATATCTTTCTCGCTTCACTTTACAGAGGGAAATGAGACGAAACAGGCACTGTGGTTACGTGAAGGC            | -21    | - | Novel-mir-824-3p | - | TGAGACGAAACAGGCACTGTGGTT |
| Novel-mir-824-2 | GGTCGCGGGGGCCACCGCACTCGACATCTTTCTCGCTTCACTTTACAGAGGGAAATGAGACGAAACAGGCACTGTGGTTACGTGCG                 | -26.3  | - | Novel-mir-824-3p | - | TGAGACGAAACAGGCACTGTGGTT |
| Novel-mir-807   | AAGCGGAGGCGATGATGGCTGTGAACACAGGGACATGGAGAACAGAGACAGGTGAAGTGGAGACTGTGCATCGACCTGTACGGCTG                 | -21.5  | - | Novel-mir-807-3p | - | TGAAGTGGAGACTGTGCATCGAC  |
| Novel-mir-761   | AGCTCAGCAGACATCTGCCCTCCATTCTAACTACCTGTGGTCTTTACAGTACAGGAGTCCAAAATCTAGTTACAGTGGGAGTCCGGGACACTGAGGT      | -32.5  | - | Novel-mir-761-3p | - | TCTAGTTACAGTGGGAGTCCGGG  |
| Novel-mir-734   | TCTGTGAGAAAGCTAGTAATCCACTGACAGGTGGGGCAGGCACAGTGAAGTGGGTCAGTTTGGAGTGGAGGATTTCCGGGATGATGG                | -23.9  | - | Novel-mir-734-3p | - | TCAGTTTGGAGTGGAGGATTTCC  |
| Novel-mir-715   | GCCCTGCCAAAAGTGTTCACAGTGGAGGTGAGCAGCTGTTGACCTCAACTGGGACATTTGACAGCGGTGAAAGAAT                           | -27.3  | - | Novel-mir-715-3p | - | TCAACTGGGACATTTGACAGCG   |
| Novel-mir-707-1 | TTTATTGATTTTCAAAGGCCTTTGACACTATTAATTTGAAATTTACTTGATAAATGGAAAGGTATGGTATTAGAGGTTTGGTGCTGAAATGGATAA       | -23.5  | - | Novel-mir-707-3p | - | TATGGTATTAGAGGTTTGGTGCTG |
| Novel-mir-707-2 | TTTATTGATTTTCAAAGGCCTTTGACACTATTAATTTGAAATTTACTTGATAAATGGAAAGGTATGGTATTAGAGGTTTGGTGCTGAAATGGATAA       | -22.7  | - | Novel-mir-707-3p | - | TATGGTATTAGAGGTTTGGTGCTG |
| Novel-mir-707-3 | TTTATTGATTTTCAAAGGCCTTTGATACTATTTACTTGATAAATGGAAAGGTATGGTATTAGAGGTTTGGTGCTGAAATGGATAA                  | -22.4  | - | Novel-mir-707-3p | - | TATGGTATTAGAGGTTTGGTGCTG |
| Novel-mir-696   | TGACAGGCTTGTGGAGGTGTTAATACTCTAACCCGGATCCACTGTCCACCGTTTATAGTTGTTACAGACCTGCAGACAATGACGTCG                | -23.2  | - | Novel-mir-696-3p | - | TAGTTGTTACAGACCTGCAGAC   |
| Novel-mir-665   | TGTGTTACAGTCCAGACTTGACAATGTAGAGGTGAGCCATCTTACATGTGTCAGACATGAGGCTGAAATTAG                               | -22.7  | - | Novel-mir-665-3p | - | TACATGTGTCAGACATGAGG     |
| Novel-mir-637   | AAGAGGGCAGCTGACGGACAGGATGTTCTTGTGAACCAGTTCGATGGGTCCTGGTCTGTGAGAGATCTTGTCTGTTGAGGTCGTCGG                | -33.3  | - | Novel-mir-637-3p | - | GGTCTGTGAGAGATCTTGTCTGTT |
| Novel-mir-601   | GCCGAGGCGTGCTGAGGCAAGTGGATAACGGCCCACTTCTCAATTGACAGATCATTGTCCCGGGTCATTTGTCCAGTAGTTGCAATCCCACT           | -23.7  | - | Novel-mir-601-3p | - | CCGGGTCATTTGTCCAGTAGTTG  |
| Novel-mir-599   | AATGCCGCTTGTCTGTGCAATGGCCTGCTTTGGGACTGACCCCAAGACTTTTGTGCTCCCTAGACTATGCCAGCCACAAAACTCGTATG              | -20.7  | - | Novel-mir-599-3p | - | CCCTAGACTATGCCAGCCACA    |
| Novel-mir-593   | TGTAAGTATCAGTGGGATTTACTATGTTCAATTTGCACTCTATGGTCATTTAAAGTGTGAGGACCATGAGTAAAGTATCCACGTACTCTCTGATG        | -24.3  | - | Novel-mir-593-3p | - | CCATGAGTAAAGTATCCACGTAC  |
| Novel-mir-561   | TCTTGTACTGCCATGGCATAGACCTCCTCTCTGCTGTGGAATCATGGTATTGGGAGAGAAACTCTGGACTTTGGCACAGG                       | -24.9  | - | Novel-mir-561-3p | - | ATTGGGAGAGAAACTCTGGACT   |
| Novel-mir-537   | TGTATAGACACCTGTAAGCCAACAGTGTGAGTGTGGGATCGGGGACTGTGGTACTGTGGATGCAGCAGGCTGTGAATTCGGTAT                   | -19.6  | - | Novel-mir-537-3p | - | ACTGTGGATGCAGCAGGCTGTG   |
| Novel-mir-532-1 | GAGTCTTTCTTACATGTTTCACTGTGCTGCTACTGTTACTTCTGAACTCAGACGTTACAGACATGAAACAGTAACTGTGGCCTGTGCAACAGTTACAGGCTC | -30.7  | - | Novel-mir-532-3p | - | ACAGTAACTGTGGCCTGTGCAAC  |
| Novel-mir-532-2 | GAGTCTTTCTTACATGTTTCACTGTGCTGCTACTGTTATTTCTGAACTCAGATGTTACAGACATGAAACAGTAACTGTGGCCTGTGCAACAGTTACAGGCTC | -29.1  | - | Novel-mir-532-3p | - | ACAGTAACTGTGGCCTGTGCAAC  |
| Novel-mir-532-3 | GAGTCTTTCTTACATGTTTCACTGTGCTGCTACTGTTATTTCTGAGCTCAGATGTTACAGACATGAAACAGTAACTGTGGCCTGTGCAACAGTTACAGGCTC | -30.89 | - | Novel-mir-532-3p | - | ACAGTAACTGTGGCCTGTGCAAC  |
| Novel-mir-539   | AACACTTTGTGTCTCCTGCAGCTACCGTTACTGCAAGAACAAGCCCTACCCCAAGTCCCGCTTCTGCAGGGGTGTGCCTGGTAAAG                 | -21.7  | - | Novel-mir-529-3p | - | AAGTCCCGCTTCTGCAGGGGTGT  |

---

### Supplementary Table S4 | The primers used in the study

Primers for qRT-PCR and making constructs, Sites for restriction enzymes are underlined.

| Primer name        | Primer sequence (5'-3')    | PCR conditions                                 |
|--------------------|----------------------------|------------------------------------------------|
| eel-U6             | F: CAAATTCGTGAAGCGTTCCTCAT | 94 °C, 15 s; 60 °C, 20s; 72 °C, 20s; 40 cycles |
| dre-U6             | F: CAAATTCGTGAAGCGTTCATCT  | 94 °C, 15 s; 60 °C, 20s; 72 °C, 20s; 40 cycles |
| dre/eel-miR-17a-5p | F: CAAAGTGCTTACAGTGCAGGTA  | 94 °C, 15 s; 60 °C, 20s; 72 °C, 20s; 40 cycles |
| dre/eel-miR-18a-5p | F: TAAGGTGCATCTAGTGCAGATA  | 94 °C, 15 s; 60 °C, 20s; 72 °C, 20s; 40 cycles |
| dre/eel-miR-19a-3p | F: TGTGCAAATCTATGCAAACTGA  | 94 °C, 15 s; 60 °C, 20s; 72 °C, 20s; 40 cycles |
| dre/eel-miR-19b-3p | F: TGTGCAAATCCATGCAAACTGA  | 94 °C, 15 s; 60 °C, 20s; 72 °C, 20s; 40 cycles |
| dre/eel-miR-20a-5p | F: TAAAGTGCTTATAGTGCAGGTAG | 94 °C, 15 s; 60 °C, 20s; 72 °C, 20s; 40 cycles |
| dre/eel-miR-92a-3p | F: TATTGCACTTGTCCCGCCTGTA  | 94 °C, 15 s; 60 °C, 20s; 72 °C, 20s; 40 cycles |
| dre-miR-17a-3p     | F: ACTGCAGTGGAGGCACTTCTAG  | 94 °C, 15 s; 60 °C, 20s; 72 °C, 20s; 40 cycles |

---



---

|                          |                                                                                 |                                                  |
|--------------------------|---------------------------------------------------------------------------------|--------------------------------------------------|
| dre-miR-19a-5p           | F:CTAGTTTTGCATAGTTGCACTAA                                                       | 94 °C, 15 s; 60 °C, 20s; 72 °C, 20s; 40 cycles   |
| dre-miR-19b-5p           | F:AGTTTTGCTGGTTGCATTCAGA                                                        | 94 °C, 15 s; 60 °C, 20s; 72 °C, 20s; 40 cycles   |
| dre-miR-20a-3p           | F:ACTGCAGTGTGAGCACTTGAAG                                                        | 94 °C, 15 s; 60 °C, 20s; 72 °C, 20s; 40 cycles   |
| eel-miR-17a-3p           | F:ACTGCAGTGAAGGCACTTTCAA                                                        | 94 °C, 15 s; 60 °C, 20s; 72 °C, 20s; 40 cycles   |
| eel-miR-18a-3p           | F:ACTGCCCTAAGTGCTCCTTCTA                                                        | 94 °C, 15 s; 60 °C, 20s; 72 °C, 20s; 40 cycles   |
| eel-miR-19a-5p           | F:CTAGTTTTGCATAGCTGCACTA                                                        | 94 °C, 15 s; 60 °C, 20s; 72 °C, 20s; 40 cycles   |
| eel-miR-19b-5p           | F:AGTTTTGCTGGTTGCATTCCGC                                                        | 94 °C, 15 s; 60 °C, 20s; 72 °C, 20s; 40 cycles   |
| eel-miR-20a-1-3p         | F:ACTGCATTGTGAGCACTTAAAA                                                        | 94 °C, 15 s; 60 °C, 20s; 72 °C, 20s; 40 cycles   |
| eel-miR-20a-3-3p         | F:CTGCAATGTGAGCACTTGAAGT                                                        | 94 °C, 15 s; 60 °C, 20s; 72 °C, 20s; 40 cycles   |
| Psi-dmrt1-3'UTR          | F: CCGCTCGAGGGGGTCGTTCTATAAGGTTTT<br>R: AATGCGGCCGCGCTTTGGTCTTGTTTGTAAAT        | 94 °C, 30 s; 62 °C, 30s; 72 °C, 1 min; 35 cycles |
| Psi-dmrt1-3'UTR<br>Mut-1 | F: TCATTCTTTCTGTACTGGA <sup>ACT</sup> CAGTAT<br>R: TCGCAGTAGTACTTACTGTCAAATCTTA | 94 °C, 30 s; 56 °C, 30s; 72 °C, 6 min; 30 cycles |

---

|                            |                                                                                                                                         |                                                  |
|----------------------------|-----------------------------------------------------------------------------------------------------------------------------------------|--------------------------------------------------|
| Psi-dmrt1-3'UTR<br>Mut-2   | F: TCATGTTTAGTAAGACTAACAGTTAATT<br>R: TCGCCTGTTGAATATGTGCATTTTCTAA                                                                      | 94 °C, 30 s; 56 °C, 30s; 72 °C, 6 min; 30 cycles |
| pcDNA6.2-<br>EmGFP-miR-19a | F: CACTGACTGACTCAGTTTATAGATTTGCA<br>CACAGGACACAAGGCCTGTTACTAGCAC<br>R: GCCAAAACCTCAGTTTTGCATAGATTTGCA<br>CACAGCATAACAGCCTTCAGCAAGCCTCCA | 94 °C, 30 s; 55 °C, 30s; 68 °C, 6 min; 30 cycles |
| pcDNA6.2-<br>EmGFP-miR-19b | F: CACTGACTGACTCAGTTTATGGATTTGCA<br>CACAGAGCACAAGGCCTGTTACTAGCAC<br>R: GCCAAAACCTCAGTTTTGCATGGATTTGCA<br>CACAGCATAACAGCCTTCAGCAAGCCTCCA | 94 °C, 30 s; 55 °C, 30s; 68 °C, 6 min; 30 cycles |
| pcDNA6.2-<br>EmGFP-miR-17a | F: CACTGACTGAC TACCTGCAGTAAGCACTT<br>TGCAGGACACAAGGCCTGTTACTAGCAC<br>R: GCCAAAACCTACCTGCACTGTAAGCACTT<br>GCAGCATAACAGCCTTCAGCAAGCCTCCA  | 94 °C, 30 s; 55 °C, 30s; 68 °C, 6 min; 30 cycles |
| pcDNA6.2-<br>EmGFP-miR-20a | F: CACTGACTGACCTACCTGCTATAAGCACTT<br>TACAGGACACAAGGCCTGTTACTAGCAC<br>R:GCCAAAACCTACCTGCACTATAAGCACTT<br>TACAGCATAACAGCCTTCAGCAAGCCTCCA  | 94 °C, 30 s; 55 °C, 30s; 68 °C, 6 min; 30 cycles |

Supplementary Figure S1

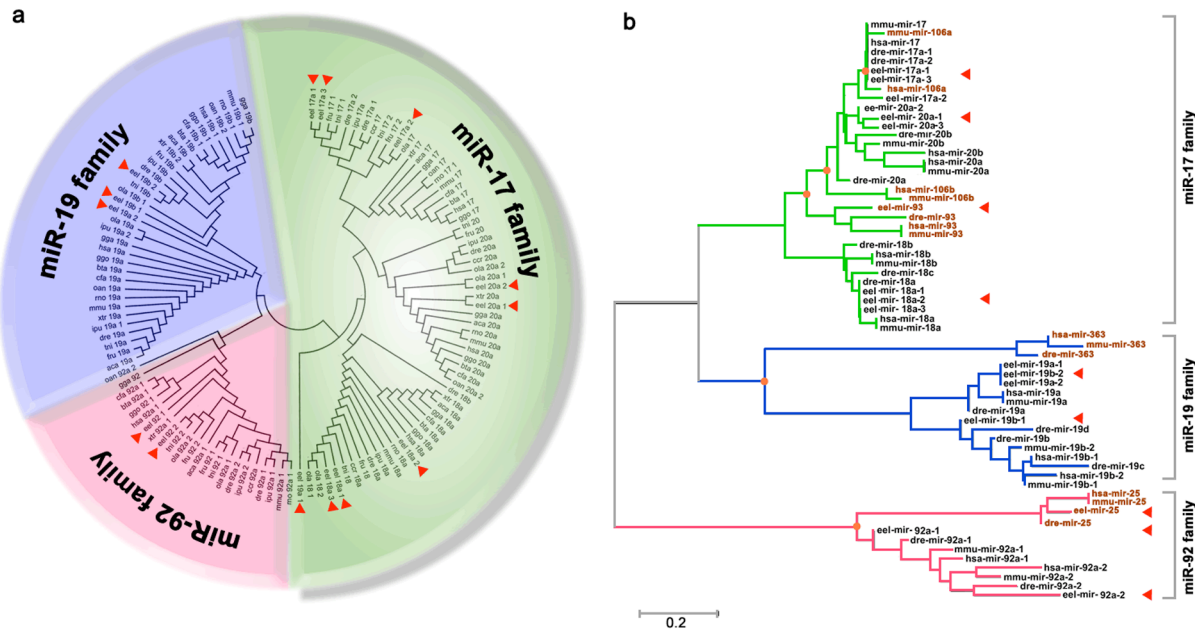

Supplementary Figure S1 | Phylogenetic analysis of miR-17-92 cluster and its paralogues. (a) Phylogenetic tree shows three miRNA families including miR-17, miR-19 and miR-92. The tree was constructed using miRNA precursors from fourteen vertebrate species including the swamp eel with MAGA 6.0. Red triangles indicate miRNAs in swamp eel. (b) Phylogenetic analysis highlights the relationship of miR-17-92 with its paralogous clusters. Red dots show branch points. miR-17-92 clusters are labeled in black color, while paralogous clusters are labeled in brown color. Red triangles indicate miRNAs in swamp eel.

Supplementary Figure S2

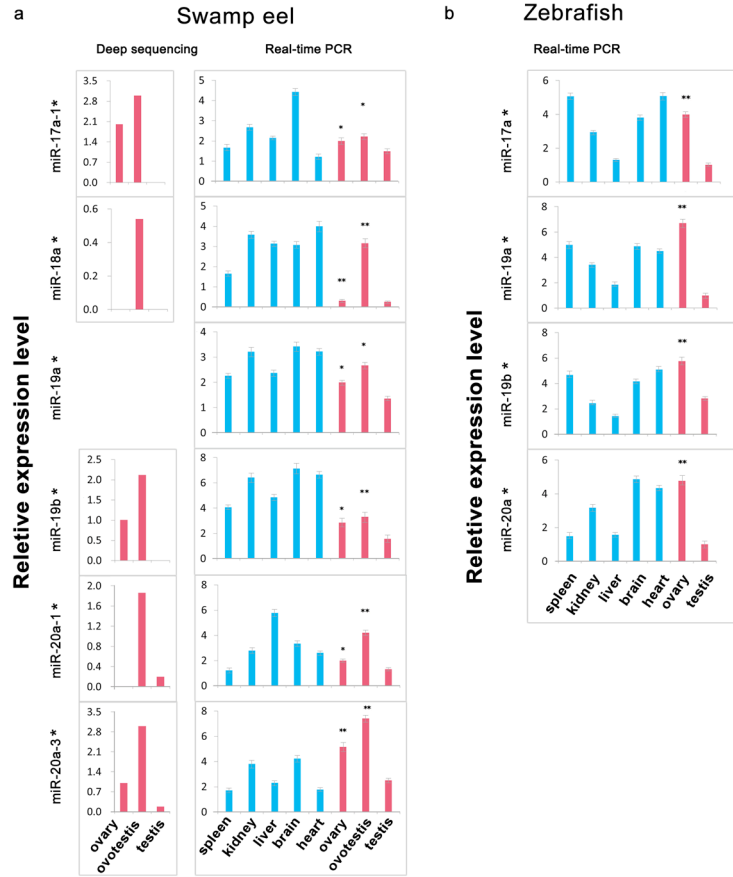

---

**Supplementary Figure S2 | Tissue distributions of star miRNAs of miR-17-92 cluster in both zebrafish and swamp eel.** (a) Six star miRNAs were expressed in adult tissues of swamp eel. The expression level in gonads was detected by q-PCR in comparison with deep sequencing (red bars). miR-19a\* was not detected by deep sequencing. However, by searching the reference genome, we did find the mature and typical stem loop of miR-19a, and detected its expression by q-PCR. (b) miR-17-92 cluster zebrafish generated six miRNAs guide strands and four star miRNAs. All of the star miRNAs were expressed in adult tissues of zebrafish. The expression was analyzed by q-PCR. The statistical significance was assessed by Student's t-test with  $p$  value  $< 0.05$ (\*),  $p$  value  $< 0.01$ (\*\*). The  $y$  axis indicates the  $\log_2$  fold change.

---

**Supplementary Figure S3**

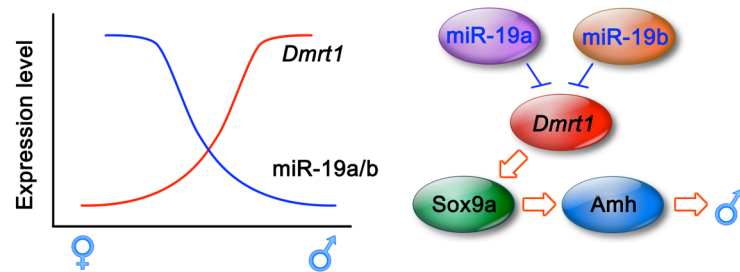

**Supplementary Figure S3 | The schematic diagram of the *Dmrt1* expression regulation by miR19a/b.** A negative correlation between *Dmrt1* and miR19a/b expressions supports the regulation pathway in gonads. Through direct repression on *Dmrt1*, miR-19a/b inhibits the expression levels of *Sox9a* and its downstream gene, *Amh*, thus leading to testis differentiation.
